# Supplementary material for: MMP14 cleaves PTH1R in the chondrocyte-derived osteoblast lineage, curbing signaling intensity for proper bone anabolism
Source: eLife. 2023 Mar 9;12:e82142. doi: 10.7554/eLife.82142 (PMC10036123; doi:10.7554/eLife.82142)
Supplement: Figure 1—source data 1. [file elife-82142-fig1-data1.xlsx]

## Sheet: Title and legend
Figure 1—source data 1. Complete list of signature genes expressed in all chondro-steogenic cell clusters from the tibia of C10Cre;RtdT postnatal day 6 mice. Genes are ranked in ascending order of p value. For the explanation of column name and cluster name, please refer to the below table.
Column Name	Explanation
gene	the mouse gene
p_val	p value
avg_log2FC	average log2(fold change)
% in this cluster	percentage of cells expressing the gene in the cluster
% in all other cells	percentage of cells expressing the gene in all other clusters
% difference	the difference between (% in this cluster) and (% in all other cells)
p_val_adj	adjusted p-values
cluster	the name of the cluster
Cluster Name	Explanation
1_Resting	Cluster 1 (resting chondrocytes)
2_Chondro	Cluster 2 (maturing chondrocytes)
3_Prolif	Cluster 3 (proliferating chondrocytes)
4_preHC	Cluster 4 (pre-hypertrophic chondrocytes)
5_HC	Cluster 5 (hypertrophic chondrocytes)
6_imOb	Cluster 6 (immature chondrocytes)
7_mOb	Cluster 7 (mature chondrocytes)
8_Osteocytes	Cluster 8 (osteocytes)
(Yellow highlighted genes refer to those listed in Figure 1 - figure supplement 1 A.)

## Sheet: resting chondrocytes
gene	p_val	avg_log2FC	% in this cluster	% in all other cells	% difference	p_val_adj	cluster
Itgbl1	4.46729e-103	0.702388	0.358	0.012	0.346	1.00581e-98	1_Resting
Pthlh	7.22918e-96	0.709929	0.358	0.014	0.344	1.62765e-91	1_Resting
Efemp1	5.20072e-50	1.81201	0.679	0.145	0.534	1.17094e-45	1_Resting
Dlk1	2.80657e-49	2.49439	0.975	0.375	0.6	6.319e-45	1_Resting
Cilp2	4.75114e-48	1.29705	0.333	0.029	0.304	1.06972e-43	1_Resting
Meg3	2.40262e-47	2.92209	1	0.686	0.314	5.4095e-43	1_Resting
Spock1	1.57859e-45	0.4441	0.259	0.018	0.241	3.55418e-41	1_Resting
Itm2a	1.71917e-45	2.04133	1	0.907	0.093	3.87072e-41	1_Resting
1500015O10Rik	2.70864e-45	2.40541	1	0.664	0.336	6.0985e-41	1_Resting
Fmod	6.08739e-41	1.82083	1	0.863	0.137	1.37058e-36	1_Resting
6330403K07Rik	1.6877e-40	0.319869	0.235	0.016	0.219	3.79986e-36	1_Resting
Wwp2	3.2209e-40	1.9183	0.975	0.761	0.214	7.25186e-36	1_Resting
Adgrg6	7.61266e-40	0.622304	0.444	0.065	0.379	1.71399e-35	1_Resting
Bgn	4.33917e-39	1.45801	1	0.982	0.018	9.76963e-35	1_Resting
Fzd2	6.63052e-39	0.942684	0.704	0.2	0.504	1.49286e-34	1_Resting
Col2a1	1.18003e-38	1.6352	1	0.996	0.004	2.65684e-34	1_Resting
Col16a1	9.30666e-38	1.51772	1	0.836	0.164	2.09539e-33	1_Resting
Vim	1.58475e-37	-2.56888	0.654	0.982	-0.328	3.56807e-33	1_Resting
Cxcl14	1.44614e-36	1.04998	0.58	0.119	0.461	3.25599e-32	1_Resting
Chadl	3.51241e-36	1.5636	0.963	0.649	0.314	7.9082e-32	1_Resting
Cntn1	8.12681e-36	0.30791	0.247	0.021	0.226	1.82975e-31	1_Resting
Col9a1	1.743e-34	1.23963	1	0.864	0.136	3.92436e-30	1_Resting
Tcea3	6.71778e-34	0.42757	0.272	0.028	0.244	1.51251e-29	1_Resting
Fibin	2.44233e-33	1.65973	0.963	0.703	0.26	5.49891e-29	1_Resting
Penk	2.76573e-33	1.77517	0.679	0.215	0.464	6.22704e-29	1_Resting
Boc	6.03554e-33	1.19309	0.691	0.236	0.455	1.3589e-28	1_Resting
Sfrp5	1.53289e-32	1.92531	0.753	0.268	0.485	3.4513e-28	1_Resting
Chad	2.98041e-32	1.72408	0.827	0.371	0.456	6.7104e-28	1_Resting
Col11a2	2.20095e-31	1.09841	1	0.907	0.093	4.95543e-27	1_Resting
Eif4a1	4.80163e-31	-1.0497	0.938	0.995	-0.057	1.08109e-26	1_Resting
Peg3	1.57651e-30	1.30101	1	0.829	0.171	3.54952e-26	1_Resting
Ucma	1.89335e-30	2.28895	0.951	0.616	0.335	4.26287e-26	1_Resting
Sparc	9.00675e-30	1.13886	1	1	0	2.02787e-25	1_Resting
S100a11	1.62433e-29	-1.37655	0.765	0.98	-0.215	3.65717e-25	1_Resting
Susd5	2.27443e-28	1.38738	0.938	0.62	0.318	5.12087e-24	1_Resting
Col9a3	6.7983e-28	1.13673	1	0.868	0.132	1.53064e-23	1_Resting
Pcp4	7.59388e-28	1.35347	0.457	0.102	0.355	1.70976e-23	1_Resting
S100a10	1.17308e-27	-1.34451	0.691	0.972	-0.281	2.64119e-23	1_Resting
Enho	3.00924e-27	1.04818	0.704	0.304	0.4	6.77529e-23	1_Resting
Pappa2	3.75929e-27	0.744806	0.333	0.053	0.28	8.46405e-23	1_Resting
Cpz	4.11257e-27	0.991578	0.667	0.188	0.479	9.25946e-23	1_Resting
Tmem121	4.64342e-27	0.506264	0.395	0.076	0.319	1.04547e-22	1_Resting
Igfbp7	1.61503e-26	1.93571	0.951	0.737	0.214	3.63624e-22	1_Resting
Islr	2.1059e-26	1.09161	1	0.828	0.172	4.74143e-22	1_Resting
Nrep	2.21511e-26	1.3873	0.914	0.638	0.276	4.98733e-22	1_Resting
Anxa2	2.3342e-26	-1.17045	0.667	0.969	-0.302	5.25546e-22	1_Resting
Runx1	7.14781e-26	-1.34137	0.148	0.82	-0.672	1.60933e-21	1_Resting
Tspan6	2.09065e-25	1.16216	0.926	0.675	0.251	4.70709e-21	1_Resting
Tmsb10	2.42074e-25	-1.75472	0.753	0.968	-0.215	5.4503e-21	1_Resting
Epb41l2	2.43147e-25	-0.970562	0.086	0.759	-0.673	5.47445e-21	1_Resting
Kctd4	3.06891e-25	0.904159	0.568	0.186	0.382	6.90964e-21	1_Resting
Pou3f3	3.4587e-25	0.950058	0.556	0.182	0.374	7.78727e-21	1_Resting
Tuba1c	2.16904e-24	-1.15987	0.21	0.805	-0.595	4.8836e-20	1_Resting
Mia	3.13603e-24	1.20768	0.988	0.666	0.322	7.06078e-20	1_Resting
Pam	4.66528e-24	0.975451	0.926	0.734	0.192	1.05039e-19	1_Resting
Col9a2	1.41876e-23	1.05992	1	0.831	0.169	3.19435e-19	1_Resting
S100a6	3.87402e-23	-1.80351	0.235	0.818	-0.583	8.72236e-19	1_Resting
Zbtb20	5.00001e-22	1.15347	0.988	0.835	0.153	1.12575e-17	1_Resting
Nfix	7.33333e-22	0.932542	0.926	0.838	0.088	1.6511e-17	1_Resting
Ppp1r3c	8.1206e-22	0.431392	0.222	0.03	0.192	1.82835e-17	1_Resting
Ifrd1	9.52659e-22	-1.31053	0.432	0.914	-0.482	2.14491e-17	1_Resting
Crispld1	1.03049e-21	1.44019	0.852	0.483	0.369	2.32014e-17	1_Resting
Smoc2	1.41226e-21	1.23463	0.963	0.721	0.242	3.1797e-17	1_Resting
Rgs3	4.70528e-21	-1.03503	0.185	0.767	-0.582	1.05939e-16	1_Resting
Sorbs2	4.78017e-21	1.29073	0.815	0.529	0.286	1.07626e-16	1_Resting
Shisa2	5.36488e-21	0.81603	0.543	0.194	0.349	1.2079e-16	1_Resting
Actb	8.45675e-21	-1.0794	1	1	0	1.90404e-16	1_Resting
Eif1	1.0411e-20	-0.645812	1	0.999	0.001	2.34403e-16	1_Resting
mt-Co1	1.52896e-20	0.765638	1	1	0	3.44245e-16	1_Resting
Cnmd	1.62314e-20	1.01948	1	0.714	0.286	3.65449e-16	1_Resting
Pmepa1	2.0718e-20	-1.15644	0.617	0.945	-0.328	4.66466e-16	1_Resting
Txn1	2.50302e-20	-0.898671	0.877	0.965	-0.088	5.63556e-16	1_Resting
Mfge8	2.87784e-20	1.23096	0.963	0.874	0.089	6.47946e-16	1_Resting
Gadd45b	3.03888e-20	-1.10603	0.63	0.96	-0.33	6.84204e-16	1_Resting
Rps11	3.66195e-20	-0.567128	0.988	0.999	-0.011	8.24489e-16	1_Resting
Lifr	4.15189e-20	-1.22464	0.086	0.653	-0.567	9.34797e-16	1_Resting
Galnt18	4.34543e-20	0.789186	0.58	0.238	0.342	9.78374e-16	1_Resting
G0s2	8.96187e-20	0.689523	0.321	0.067	0.254	2.01777e-15	1_Resting
Lgmn	2.66294e-19	-0.986351	0.247	0.774	-0.527	5.9956e-15	1_Resting
Cdkn1a	4.37224e-19	-1.18684	0.309	0.85	-0.541	9.8441e-15	1_Resting
Vit	4.94136e-19	1.05148	0.383	0.101	0.282	1.11255e-14	1_Resting
Prelid1	6.14332e-19	-0.844486	0.494	0.881	-0.387	1.38317e-14	1_Resting
Slc25a5	8.45038e-19	-0.972373	0.654	0.945	-0.291	1.9026e-14	1_Resting
Tnfrsf12a	1.18527e-18	-1.03199	0.16	0.71	-0.55	2.66863e-14	1_Resting
Rpl41	1.34147e-18	-0.440672	1	1	0	3.02031e-14	1_Resting
Errfi1	1.47055e-18	-1.32215	0.296	0.81	-0.514	3.31095e-14	1_Resting
Net1	1.48739e-18	0.775896	0.642	0.304	0.338	3.34886e-14	1_Resting
Rpl8	2.36064e-18	-0.425074	1	1	0	5.31497e-14	1_Resting
Capn6	3.24112e-18	0.953284	0.938	0.715	0.223	7.29737e-14	1_Resting
Vkorc1	3.93327e-18	0.834165	0.975	0.885	0.09	8.85575e-14	1_Resting
Dcn	4.55211e-18	0.931708	0.963	0.868	0.095	1.02491e-13	1_Resting
Thra	5.488e-18	0.748823	0.827	0.579	0.248	1.23562e-13	1_Resting
Prnp	5.65875e-18	0.952884	0.889	0.665	0.224	1.27407e-13	1_Resting
Srpx2	5.99935e-18	1.0202	0.728	0.354	0.374	1.35075e-13	1_Resting
Ebf1	6.31286e-18	-1.30852	0.16	0.698	-0.538	1.42134e-13	1_Resting
Ctsz	6.66319e-18	-1.11359	0.84	0.958	-0.118	1.50022e-13	1_Resting
Col11a1	9.42031e-18	0.787283	1	0.979	0.021	2.12098e-13	1_Resting
Ccdc80	1.08301e-17	-1.08058	0.358	0.82	-0.462	2.4384e-13	1_Resting
Sertad4	1.11321e-17	0.797618	0.58	0.267	0.313	2.50639e-13	1_Resting
Col3a1	1.1374e-17	0.689817	0.963	0.662	0.301	2.56085e-13	1_Resting
Rps20	2.2188e-17	-0.469516	1	0.999	0.001	4.99563e-13	1_Resting
Rbp4	2.56487e-17	1.77293	0.815	0.596	0.219	5.7748e-13	1_Resting
Pantr1	3.41486e-17	0.670431	0.543	0.234	0.309	7.68856e-13	1_Resting
Wnt4	3.71745e-17	-1.07241	0.111	0.648	-0.537	8.36983e-13	1_Resting
Fgfrl1	4.18108e-17	0.845513	0.914	0.651	0.263	9.4137e-13	1_Resting
Trps1	4.61278e-17	0.966415	0.938	0.802	0.136	1.03857e-12	1_Resting
Mt1	6.73871e-17	-1.67278	0.185	0.701	-0.516	1.51722e-12	1_Resting
Hoxa10	6.98671e-17	0.76539	0.617	0.309	0.308	1.57306e-12	1_Resting
Rbm3	7.04661e-17	-0.604142	0.975	0.992	-0.017	1.58654e-12	1_Resting
Timp1	9.07427e-17	-1.65929	0.519	0.857	-0.338	2.04307e-12	1_Resting
Atp5b	1.01988e-16	-0.675272	0.877	0.985	-0.108	2.29627e-12	1_Resting
Tcf4	1.17989e-16	1.00734	0.889	0.793	0.096	2.65653e-12	1_Resting
Fzd9	1.40057e-16	0.683989	0.457	0.164	0.293	3.15339e-12	1_Resting
Eif2s2	1.50275e-16	-0.708778	0.877	0.977	-0.1	3.38345e-12	1_Resting
Rpl27	1.57794e-16	-0.530369	0.963	0.991	-0.028	3.55273e-12	1_Resting
Piezo2	1.74219e-16	0.623819	0.556	0.24	0.316	3.92254e-12	1_Resting
Vsir	1.91062e-16	0.380912	0.21	0.035	0.175	4.30177e-12	1_Resting
Crim1	2.93174e-16	0.932403	0.679	0.393	0.286	6.6008e-12	1_Resting
Chil1	3.65612e-16	0.653842	0.395	0.119	0.276	8.23175e-12	1_Resting
Anxa1	3.81933e-16	-1.25971	0.185	0.673	-0.488	8.59923e-12	1_Resting
Smo	5.14123e-16	0.794798	0.79	0.611	0.179	1.15755e-11	1_Resting
Rpl23a	5.89832e-16	-0.586837	0.963	0.995	-0.032	1.32801e-11	1_Resting
Rpl32	6.23543e-16	-0.58704	1	0.999	0.001	1.40391e-11	1_Resting
Emp1	7.9943e-16	-1.26584	0.519	0.879	-0.36	1.79992e-11	1_Resting
H19	9.02441e-16	0.94579	0.988	0.825	0.163	2.03185e-11	1_Resting
Tubb6	9.15128e-16	-0.768294	0.136	0.635	-0.499	2.06041e-11	1_Resting
Sem1	1.02404e-15	-0.674939	0.963	0.993	-0.03	2.30562e-11	1_Resting
Apoe	1.16084e-15	1.52454	0.642	0.333	0.309	2.61363e-11	1_Resting
Tceal3	1.29644e-15	0.678357	0.481	0.194	0.287	2.91894e-11	1_Resting
Cox8a	1.4656e-15	-0.574246	0.951	0.991	-0.04	3.29979e-11	1_Resting
Ctsd	1.53337e-15	0.760562	0.975	0.914	0.061	3.45238e-11	1_Resting
Prdx1	2.95942e-15	-0.645397	0.938	0.99	-0.052	6.66313e-11	1_Resting
Gadd45g	3.43763e-15	-1.08142	0.395	0.842	-0.447	7.73983e-11	1_Resting
Camk4	3.60178e-15	0.455087	0.309	0.079	0.23	8.1094e-11	1_Resting
Edil3	3.74806e-15	0.717472	0.877	0.636	0.241	8.43875e-11	1_Resting
Pdgfrl	3.85285e-15	0.905197	0.79	0.611	0.179	8.6747e-11	1_Resting
Ctnnb1	4.50761e-15	-0.601961	0.975	0.991	-0.016	1.01489e-10	1_Resting
Ldha	5.40577e-15	-1.1225	0.926	0.98	-0.054	1.21711e-10	1_Resting
Cox5a	5.50416e-15	-0.611154	0.84	0.948	-0.108	1.23926e-10	1_Resting
Mpp6	5.65318e-15	-0.810239	0.37	0.796	-0.426	1.27281e-10	1_Resting
Cebpb	6.62538e-15	-1.17275	0.457	0.837	-0.38	1.4917e-10	1_Resting
Fkbp9	6.99296e-15	0.606917	0.988	0.965	0.023	1.57446e-10	1_Resting
Gpx4	8.11169e-15	-0.730466	0.802	0.969	-0.167	1.82635e-10	1_Resting
Runx2	8.61221e-15	-0.691658	0.321	0.828	-0.507	1.93904e-10	1_Resting
Igf2	9.16499e-15	0.826614	0.827	0.591	0.236	2.0635e-10	1_Resting
Ism1	1.06657e-14	0.334719	0.272	0.058	0.214	2.40138e-10	1_Resting
Cpq	1.2553e-14	0.748942	0.827	0.598	0.229	2.82631e-10	1_Resting
Nucb2	1.30743e-14	0.670025	0.864	0.659	0.205	2.94367e-10	1_Resting
Srpx	1.32972e-14	0.946387	0.84	0.701	0.139	2.99387e-10	1_Resting
Hmgcr	1.59354e-14	-0.821869	0.259	0.727	-0.468	3.58786e-10	1_Resting
Rpl24	1.78361e-14	-0.425911	0.988	0.998	-0.01	4.01581e-10	1_Resting
Rpl18a	2.19651e-14	-0.515505	1	1	0	4.94545e-10	1_Resting
Hnrnpf	2.20096e-14	-0.592833	0.877	0.966	-0.089	4.95547e-10	1_Resting
Rpl15	3.16872e-14	-0.435128	1	0.998	0.002	7.13437e-10	1_Resting
Rpl37	3.17947e-14	-0.50975	1	0.999	0.001	7.15858e-10	1_Resting
Plec	3.25127e-14	-0.688991	0.235	0.708	-0.473	7.32025e-10	1_Resting
Spon1	3.42667e-14	0.977204	0.333	0.099	0.234	7.71515e-10	1_Resting
Rps15a	3.75626e-14	-0.519584	1	0.998	0.002	8.45722e-10	1_Resting
Hmgcs1	4.39236e-14	-0.852128	0.346	0.785	-0.439	9.8894e-10	1_Resting
Igf2r	4.71039e-14	0.74374	0.914	0.781	0.133	1.06054e-09	1_Resting
Lpar4	5.08005e-14	1.13451	0.605	0.358	0.247	1.14377e-09	1_Resting
Rps17	5.37546e-14	-0.518922	0.963	0.995	-0.032	1.21028e-09	1_Resting
Rps12	7.86139e-14	-0.452925	1	0.999	0.001	1.76999e-09	1_Resting
Rpl27a	7.91402e-14	-0.45395	1	1	0	1.78184e-09	1_Resting
Rps2	8.13188e-14	-0.454768	1	1	0	1.83089e-09	1_Resting
Panx3	8.55415e-14	-1.18015	0.099	0.547	-0.448	1.92597e-09	1_Resting
Rps16	8.56095e-14	-0.460335	1	0.999	0.001	1.9275e-09	1_Resting
Rpl7	8.82564e-14	-0.483504	1	0.998	0.002	1.98709e-09	1_Resting
Ran	1.10157e-13	-0.791565	0.778	0.947	-0.169	2.48018e-09	1_Resting
Rgcc	1.12627e-13	-1.34057	0.309	0.73	-0.421	2.5358e-09	1_Resting
Tpm1	1.13099e-13	-1.48621	0.642	0.941	-0.299	2.54643e-09	1_Resting
Thbs1	1.19728e-13	0.947769	0.975	0.852	0.123	2.69568e-09	1_Resting
Ndufb8	1.29715e-13	-0.578809	0.691	0.938	-0.247	2.92053e-09	1_Resting
Cst3	1.41465e-13	1.87834	0.988	0.99	-0.002	3.18509e-09	1_Resting
Rflna	1.5155e-13	0.77594	0.728	0.464	0.264	3.41215e-09	1_Resting
Col27a1	1.62623e-13	0.802871	1	0.82	0.18	3.66146e-09	1_Resting
Lsmem1	1.64567e-13	-0.923533	0.136	0.586	-0.45	3.70523e-09	1_Resting
Msmo1	1.79129e-13	-0.935598	0.222	0.656	-0.434	4.03309e-09	1_Resting
Gapdh	1.79863e-13	-1.10217	1	0.994	0.006	4.0496e-09	1_Resting
Col4a5	1.91216e-13	0.442332	0.296	0.082	0.214	4.30524e-09	1_Resting
Fn1	2.18604e-13	0.512378	0.988	0.988	0	4.92187e-09	1_Resting
Gpc1	2.28449e-13	-0.80792	0.642	0.919	-0.277	5.14353e-09	1_Resting
Fbxo2	2.38241e-13	0.269445	0.235	0.052	0.183	5.36399e-09	1_Resting
Fau	2.55209e-13	-0.549994	1	0.999	0.001	5.74603e-09	1_Resting
Rpl28	2.81348e-13	-0.491241	1	1	0	6.33454e-09	1_Resting
Alpl	2.96398e-13	-1.88185	0.173	0.581	-0.408	6.67339e-09	1_Resting
Naca	2.99744e-13	-0.469753	0.988	0.991	-0.003	6.74874e-09	1_Resting
Gja1	3.08589e-13	-1.63692	0.296	0.689	-0.393	6.94788e-09	1_Resting
Hsd17b7	3.50994e-13	-0.562915	0.086	0.545	-0.459	7.90262e-09	1_Resting
Cpm	3.61611e-13	0.815939	0.605	0.298	0.307	8.14166e-09	1_Resting
Hacd1	3.82503e-13	-0.607399	0.284	0.724	-0.44	8.61205e-09	1_Resting
Lrp1	4.28694e-13	0.621159	0.938	0.912	0.026	9.65205e-09	1_Resting
Tpst1	4.38086e-13	0.610779	0.519	0.254	0.265	9.86351e-09	1_Resting
Uqcrq	4.38684e-13	-0.637845	0.778	0.948	-0.17	9.87698e-09	1_Resting
Ppia	4.69586e-13	-0.481068	1	0.996	0.004	1.05727e-08	1_Resting
Ubc	4.84786e-13	-0.733839	0.926	0.996	-0.07	1.0915e-08	1_Resting
Il17b	5.34192e-13	-1.52635	0.049	0.469	-0.42	1.20273e-08	1_Resting
Abracl	5.79902e-13	-0.704732	0.173	0.632	-0.459	1.30565e-08	1_Resting
H2afz	6.42666e-13	-1.11365	0.864	0.98	-0.116	1.44696e-08	1_Resting
Rpsa	6.54492e-13	-0.416382	1	1	0	1.47359e-08	1_Resting
Adamts1	6.56996e-13	-1.01501	0.099	0.533	-0.434	1.47923e-08	1_Resting
Ecm2	7.5693e-13	0.489233	0.284	0.075	0.209	1.70423e-08	1_Resting
Rpl18	8.67768e-13	-0.392122	1	1	0	1.95378e-08	1_Resting
Jak1	9.13505e-13	-0.682405	0.21	0.681	-0.471	2.05676e-08	1_Resting
Eif5a	9.48868e-13	-0.551529	0.975	0.985	-0.01	2.13638e-08	1_Resting
Ier3	1.00079e-12	-0.989806	0.383	0.824	-0.441	2.25328e-08	1_Resting
H2-K1	1.038e-12	-0.827241	0.222	0.656	-0.434	2.33706e-08	1_Resting
Gdf10	1.18398e-12	-1.00093	0.123	0.538	-0.415	2.66574e-08	1_Resting
Btf3	1.31339e-12	-0.447671	0.988	0.992	-0.004	2.9571e-08	1_Resting
Prkg2	1.35913e-12	-0.773325	0.062	0.486	-0.424	3.06007e-08	1_Resting
Ndrg1	1.46823e-12	-0.562304	0.074	0.519	-0.445	3.30571e-08	1_Resting
H2-DMa	1.58831e-12	-0.887197	0.062	0.488	-0.426	3.57609e-08	1_Resting
Samd5	1.67061e-12	0.338682	0.235	0.054	0.181	3.76139e-08	1_Resting
Gm42418	1.69183e-12	0.399369	1	1	0	3.80916e-08	1_Resting
Dusp5	1.81931e-12	-0.72372	0.099	0.517	-0.418	4.09618e-08	1_Resting
Map7d1	1.82085e-12	-0.555976	0.259	0.723	-0.464	4.09963e-08	1_Resting
Rps23	1.955e-12	-0.429857	1	0.999	0.001	4.40169e-08	1_Resting
Arpc1b	1.99019e-12	-0.797978	0.543	0.88	-0.337	4.48091e-08	1_Resting
Rps8	2.41745e-12	-0.375858	1	1	0	5.44288e-08	1_Resting
Rpl21	2.42178e-12	-0.419573	0.988	0.998	-0.01	5.45264e-08	1_Resting
Stk26	2.53408e-12	0.727072	0.741	0.511	0.23	5.70548e-08	1_Resting
Cct8	2.53915e-12	-0.576106	0.568	0.891	-0.323	5.7169e-08	1_Resting
Cfh	2.63632e-12	-2.28867	0.049	0.442	-0.393	5.93567e-08	1_Resting
Psmc6	3.13853e-12	-0.535593	0.358	0.808	-0.45	7.06639e-08	1_Resting
Hnrnpa1	3.34468e-12	-0.616882	0.852	0.977	-0.125	7.53056e-08	1_Resting
Sh3glb1	3.9104e-12	-0.556055	0.716	0.934	-0.218	8.80427e-08	1_Resting
Palld	3.96927e-12	-0.739966	0.062	0.476	-0.414	8.9368e-08	1_Resting
Megf6	4.00494e-12	0.885331	0.494	0.238	0.256	9.01712e-08	1_Resting
Cfl1	4.25342e-12	-0.818119	0.765	0.968	-0.203	9.57657e-08	1_Resting
Atf3	4.25421e-12	-0.492245	0.272	0.743	-0.471	9.57836e-08	1_Resting
Rnf19b	4.26884e-12	-0.545915	0.222	0.668	-0.446	9.61129e-08	1_Resting
Npm1	4.53505e-12	-0.570638	1	0.996	0.004	1.02107e-07	1_Resting
Hsp90aa1	5.0004e-12	-0.498321	0.901	0.993	-0.092	1.12584e-07	1_Resting
Sgms2	5.56064e-12	-1.4513	0.346	0.713	-0.367	1.25198e-07	1_Resting
Rras2	6.09506e-12	-0.516173	0.062	0.475	-0.413	1.3723e-07	1_Resting
Rtn4	6.21665e-12	-0.647317	0.593	0.925	-0.332	1.39968e-07	1_Resting
Rap1b	6.39671e-12	-0.669697	0.37	0.803	-0.433	1.44022e-07	1_Resting
Ppp1r14b	7.16784e-12	-0.634079	0.741	0.919	-0.178	1.61384e-07	1_Resting
Rpl10a	7.41984e-12	-0.440144	0.988	0.999	-0.011	1.67058e-07	1_Resting
Hnrnpab	8.3542e-12	-0.563655	0.753	0.955	-0.202	1.88095e-07	1_Resting
Rcan1	9.81922e-12	-1.30562	0.173	0.583	-0.41	2.2108e-07	1_Resting
Cox6a1	1.06411e-11	-0.589525	0.667	0.939	-0.272	2.39584e-07	1_Resting
Abi3bp	1.08039e-11	1.08588	0.296	0.087	0.209	2.4325e-07	1_Resting
Calm2	1.11194e-11	-0.700911	0.852	0.976	-0.124	2.50352e-07	1_Resting
Actg1	1.11336e-11	-0.82326	0.963	0.987	-0.024	2.50673e-07	1_Resting
Sema3c	1.12198e-11	0.415436	0.296	0.09	0.206	2.52614e-07	1_Resting
Ebp	1.16116e-11	-0.502357	0.148	0.579	-0.431	2.61434e-07	1_Resting
Nfic	1.16912e-11	0.571416	0.84	0.692	0.148	2.63228e-07	1_Resting
Cdkn1c	1.20381e-11	0.461967	1	0.843	0.157	2.71037e-07	1_Resting
2010107E04Rik	1.21331e-11	-0.552816	0.679	0.936	-0.257	2.73177e-07	1_Resting
Ldhb	1.25252e-11	0.64786	0.704	0.499	0.205	2.82004e-07	1_Resting
mt-Nd5	1.2688e-11	0.556119	0.975	0.992	-0.017	2.85669e-07	1_Resting
Rpl30	1.26991e-11	-0.409125	1	0.999	0.001	2.85921e-07	1_Resting
Tagln2	1.30132e-11	-0.912657	0.16	0.588	-0.428	2.92993e-07	1_Resting
Tpm4	1.34779e-11	-0.770834	0.432	0.822	-0.39	3.03454e-07	1_Resting
Fhl2	1.5273e-11	-0.826471	0.037	0.428	-0.391	3.43871e-07	1_Resting
Insig1	1.57368e-11	-0.58313	0.407	0.8	-0.393	3.54313e-07	1_Resting
Lmna	1.63896e-11	-0.824604	0.617	0.933	-0.316	3.69012e-07	1_Resting
Tuba1a	1.67075e-11	-1.13156	0.716	0.894	-0.178	3.76169e-07	1_Resting
Twf1	1.67734e-11	-0.413535	0.173	0.631	-0.458	3.77653e-07	1_Resting
Matn4	1.69111e-11	0.962211	0.889	0.728	0.161	3.80753e-07	1_Resting
Auts2	1.90477e-11	0.744594	0.84	0.789	0.051	4.28859e-07	1_Resting
Stk40	2.11931e-11	-0.469279	0.136	0.561	-0.425	4.77163e-07	1_Resting
Hoxa11	2.13825e-11	0.633775	0.407	0.178	0.229	4.81427e-07	1_Resting
Vdac1	2.18427e-11	-0.562141	0.58	0.863	-0.283	4.91789e-07	1_Resting
Rpl35a	2.19907e-11	-0.475929	0.988	0.999	-0.011	4.95121e-07	1_Resting
Tspan17	2.40719e-11	-0.465437	0.049	0.444	-0.395	5.41978e-07	1_Resting
Hk2	2.40932e-11	-0.535227	0.173	0.608	-0.435	5.42459e-07	1_Resting
Rps18	2.43389e-11	-0.45148	1	0.999	0.001	5.47991e-07	1_Resting
Ybx1	2.45684e-11	-0.498314	0.963	0.991	-0.028	5.53158e-07	1_Resting
Raph1	2.45889e-11	-0.679831	0.556	0.856	-0.3	5.53619e-07	1_Resting
Mgp	2.65996e-11	1.72543	0.988	0.815	0.173	5.9889e-07	1_Resting
Gsn	2.75476e-11	-1.02892	0.321	0.731	-0.41	6.20235e-07	1_Resting
Lpl	2.87977e-11	-1.54503	0.099	0.5	-0.401	6.48379e-07	1_Resting
Vldlr	2.99299e-11	-0.503316	0.062	0.458	-0.396	6.73871e-07	1_Resting
Itga1	3.06383e-11	-0.769857	0.111	0.512	-0.401	6.89821e-07	1_Resting
Rps27l	3.15102e-11	-0.538841	0.827	0.968	-0.141	7.09451e-07	1_Resting
Atraid	3.16517e-11	0.465508	0.926	0.876	0.05	7.12638e-07	1_Resting
Hivep3	3.17158e-11	-0.696572	0.21	0.628	-0.418	7.14081e-07	1_Resting
Pdcd10	3.33941e-11	-0.455505	0.259	0.702	-0.443	7.51869e-07	1_Resting
Ppa1	3.44502e-11	-1.90448	0.605	0.809	-0.204	7.75647e-07	1_Resting
Bach1	3.44573e-11	-0.525793	0.111	0.521	-0.41	7.75805e-07	1_Resting
Cct4	3.95245e-11	-0.531514	0.481	0.868	-0.387	8.89895e-07	1_Resting
Mest	4.06627e-11	0.72317	0.84	0.637	0.203	9.15521e-07	1_Resting
Zfand5	4.1255e-11	-0.693016	0.642	0.924	-0.282	9.28857e-07	1_Resting
Cyp51	4.23774e-11	-0.598283	0.284	0.706	-0.422	9.54128e-07	1_Resting
Car12	4.28566e-11	-0.597441	0.012	0.383	-0.371	9.64916e-07	1_Resting
Synpo	4.45545e-11	0.685325	0.691	0.496	0.195	1.00314e-06	1_Resting
Rpl31	4.73033e-11	-0.388816	0.988	0.991	-0.003	1.06503e-06	1_Resting
Atp1a1	4.7549e-11	-0.872185	0.667	0.957	-0.29	1.07057e-06	1_Resting
Nab1	4.79488e-11	-0.451669	0.099	0.503	-0.404	1.07957e-06	1_Resting
Rpl13	5.24896e-11	-0.375076	1	1	0	1.1818e-06	1_Resting
Ltbp3	5.32701e-11	0.546974	0.778	0.571	0.207	1.19938e-06	1_Resting
Ddx5	5.45827e-11	-0.565447	0.951	0.998	-0.047	1.22893e-06	1_Resting
Fads3	5.66004e-11	-0.450116	0.074	0.464	-0.39	1.27436e-06	1_Resting
Sp7	6.37509e-11	-0.468473	0.062	0.451	-0.389	1.43535e-06	1_Resting
Mfap2	6.53957e-11	0.454813	0.84	0.586	0.254	1.47238e-06	1_Resting
Hist1h2bc	6.79437e-11	-1.17869	0.457	0.745	-0.288	1.52975e-06	1_Resting
Mdh2	6.81913e-11	-0.520983	0.568	0.894	-0.326	1.53533e-06	1_Resting
Rpl7a	8.47877e-11	-0.37718	0.988	0.997	-0.009	1.909e-06	1_Resting
Ptprd	8.5011e-11	-1.12003	0.198	0.559	-0.361	1.91402e-06	1_Resting
Rpl19	1.00075e-10	-0.352765	1	0.999	0.001	2.2532e-06	1_Resting
Smad1	1.08428e-10	-0.456912	0.198	0.641	-0.443	2.44125e-06	1_Resting
Unc5b	1.09902e-10	-0.590197	0.136	0.556	-0.42	2.47444e-06	1_Resting
Rpl36al	1.1626e-10	-0.473874	0.926	0.975	-0.049	2.6176e-06	1_Resting
Rack1	1.28789e-10	-0.410215	1	0.999	0.001	2.89969e-06	1_Resting
Cycs	1.29357e-10	-0.608135	0.593	0.863	-0.27	2.91248e-06	1_Resting
Coq10b	1.45849e-10	-0.454038	0.284	0.73	-0.446	3.2838e-06	1_Resting
Ndufb9	1.73374e-10	-0.478561	0.802	0.959	-0.157	3.90352e-06	1_Resting
Tbca	1.75238e-10	-0.495558	0.728	0.935	-0.207	3.94549e-06	1_Resting
Cct3	1.75329e-10	-0.522191	0.481	0.848	-0.367	3.94752e-06	1_Resting
Myo10	1.81401e-10	-0.571111	0.123	0.515	-0.392	4.08423e-06	1_Resting
Cdh2	1.98586e-10	-1.14204	0.049	0.401	-0.352	4.47116e-06	1_Resting
Stat5b	1.99011e-10	0.470477	0.37	0.151	0.219	4.48074e-06	1_Resting
Chchd2	2.00675e-10	-0.390416	1	0.995	0.005	4.51819e-06	1_Resting
Med10	2.03025e-10	-0.483042	0.235	0.657	-0.422	4.57111e-06	1_Resting
Eif4g2	2.04724e-10	-0.429466	0.951	0.991	-0.04	4.60936e-06	1_Resting
Eef2	2.05901e-10	-0.38502	1	0.999	0.001	4.63586e-06	1_Resting
Atp6v0e	2.1218e-10	-0.557803	0.716	0.897	-0.181	4.77724e-06	1_Resting
Chsy1	2.20323e-10	-0.481229	0.346	0.751	-0.405	4.96056e-06	1_Resting
Rpl23	2.34759e-10	-0.370273	1	0.999	0.001	5.2856e-06	1_Resting
Msn	2.36234e-10	-0.453042	0.259	0.708	-0.449	5.3188e-06	1_Resting
Pura	2.47066e-10	0.535559	0.79	0.693	0.097	5.5627e-06	1_Resting
Cox5b	2.72212e-10	-0.481285	0.815	0.956	-0.141	6.12886e-06	1_Resting
Sec11c	2.9282e-10	-0.492743	0.21	0.612	-0.402	6.59284e-06	1_Resting
Rpl14	2.95226e-10	-0.373332	0.988	0.997	-0.009	6.64701e-06	1_Resting
Alcam	3.11115e-10	0.551325	0.296	0.101	0.195	7.00475e-06	1_Resting
Flna	3.30747e-10	-0.723278	0.185	0.574	-0.389	7.44678e-06	1_Resting
Fdps	3.41001e-10	-0.801677	0.395	0.726	-0.331	7.67764e-06	1_Resting
Gal3st1	3.54693e-10	0.356577	0.284	0.094	0.19	7.9859e-06	1_Resting
mt-Co2	3.77283e-10	0.401651	1	1	0	8.49452e-06	1_Resting
Cox6b1	4.21012e-10	-0.448254	0.877	0.976	-0.099	9.47909e-06	1_Resting
Tomm20	4.25285e-10	-0.489029	0.914	0.968	-0.054	9.57529e-06	1_Resting
mt-Co3	4.30744e-10	0.427189	1	1	0	9.69821e-06	1_Resting
Map2k3	4.42851e-10	-0.50566	0.272	0.691	-0.419	9.97079e-06	1_Resting
Idi1	4.45514e-10	-0.645266	0.247	0.632	-0.385	1.00307e-05	1_Resting
Stk17b	4.48932e-10	-0.589744	0.074	0.434	-0.36	1.01077e-05	1_Resting
Ywhaq	4.59613e-10	-0.641979	0.778	0.933	-0.155	1.03482e-05	1_Resting
Psmc4	4.81192e-10	-0.522046	0.37	0.759	-0.389	1.0834e-05	1_Resting
Ftl1	4.84746e-10	-0.587645	1	0.997	0.003	1.09141e-05	1_Resting
Bmp2k	4.87913e-10	-0.457396	0	0.338	-0.338	1.09854e-05	1_Resting
Elovl1	5.34804e-10	-0.41073	0.148	0.55	-0.402	1.20411e-05	1_Resting
Psat1	5.42226e-10	-0.341486	0	0.337	-0.337	1.22082e-05	1_Resting
Malat1	5.45988e-10	0.525	1	0.999	0.001	1.22929e-05	1_Resting
Asap1	5.50403e-10	-0.445217	0.111	0.497	-0.386	1.23923e-05	1_Resting
Cct2	5.52835e-10	-0.474196	0.741	0.933	-0.192	1.24471e-05	1_Resting
Dpysl3	5.77957e-10	-1.04245	0.025	0.364	-0.339	1.30127e-05	1_Resting
Cox4i1	6.13537e-10	-0.404428	0.975	0.997	-0.022	1.38138e-05	1_Resting
Eif3f	6.73452e-10	-0.436158	0.901	0.983	-0.082	1.51628e-05	1_Resting
Gsr	7.1079e-10	-0.4858	0.173	0.567	-0.394	1.60034e-05	1_Resting
Lum	7.33665e-10	-0.989892	0.815	0.907	-0.092	1.65185e-05	1_Resting
Aldoc	7.35016e-10	-0.624739	0.111	0.467	-0.356	1.65489e-05	1_Resting
Bsg	7.37785e-10	-0.894751	0.938	0.99	-0.052	1.66112e-05	1_Resting
Trabd2b	7.74115e-10	0.615132	0.543	0.312	0.231	1.74292e-05	1_Resting
Batf3	7.76764e-10	-0.472601	0.049	0.399	-0.35	1.74888e-05	1_Resting
Psma2	7.76831e-10	-0.464521	0.716	0.923	-0.207	1.74903e-05	1_Resting
Sdc3	8.73721e-10	-0.546045	0.58	0.879	-0.299	1.96718e-05	1_Resting
Btg1	8.80426e-10	-0.647164	0.741	0.969	-0.228	1.98228e-05	1_Resting
Rps6	9.12005e-10	-0.436477	1	0.997	0.003	2.05338e-05	1_Resting
Zeb2	9.61439e-10	-0.864848	0.037	0.379	-0.342	2.16468e-05	1_Resting
Sesn2	1.0004e-09	-0.378807	0.049	0.401	-0.352	2.25239e-05	1_Resting
Sbno2	1.03495e-09	-0.441632	0.136	0.531	-0.395	2.33019e-05	1_Resting
Dgkh	1.04444e-09	-0.383942	0.062	0.424	-0.362	2.35156e-05	1_Resting
Rpl10	1.05474e-09	-0.358831	1	0.998	0.002	2.37474e-05	1_Resting
Scd1	1.06514e-09	-0.643731	0.235	0.584	-0.349	2.39816e-05	1_Resting
Ier5	1.08416e-09	-0.723062	0.42	0.816	-0.396	2.441e-05	1_Resting
Myc	1.09796e-09	-0.536262	0.198	0.586	-0.388	2.47206e-05	1_Resting
Ptpn2	1.16646e-09	-0.411652	0.247	0.662	-0.415	2.6263e-05	1_Resting
Mmp2	1.17085e-09	0.713572	0.901	0.888	0.013	2.63616e-05	1_Resting
Anxa7	1.17252e-09	-0.431822	0.16	0.543	-0.383	2.63993e-05	1_Resting
Srsf11	1.21488e-09	0.5915	0.864	0.877	-0.013	2.73531e-05	1_Resting
Shox2	1.28792e-09	0.598958	0.852	0.804	0.048	2.89976e-05	1_Resting
Rps13	1.32955e-09	-0.35334	1	0.998	0.002	2.99349e-05	1_Resting
Nt5dc2	1.3717e-09	-0.520424	0.457	0.826	-0.369	3.08838e-05	1_Resting
Dctn3	1.38979e-09	-0.826472	0.383	0.76	-0.377	3.12911e-05	1_Resting
Rps3a1	1.41399e-09	-0.327678	1	1	0	3.1836e-05	1_Resting
Col12a1	1.53177e-09	0.663979	0.951	0.774	0.177	3.44879e-05	1_Resting
Srxn1	1.53309e-09	-0.982015	0.136	0.495	-0.359	3.45175e-05	1_Resting
Myh9	1.57213e-09	-0.575759	0.21	0.602	-0.392	3.53965e-05	1_Resting
Uchl3	1.57502e-09	-0.380977	0.173	0.56	-0.387	3.54615e-05	1_Resting
Cul3	1.57804e-09	-0.410802	0.333	0.764	-0.431	3.55295e-05	1_Resting
Clic4	1.59841e-09	-0.637444	0.642	0.878	-0.236	3.59881e-05	1_Resting
Tenm3	1.66691e-09	0.482158	0.531	0.306	0.225	3.75305e-05	1_Resting
Phgdh	1.73719e-09	-0.522109	0.296	0.685	-0.389	3.91129e-05	1_Resting
Tbrg1	1.79252e-09	-0.621695	0.704	0.905	-0.201	4.03585e-05	1_Resting
Pabpc1	1.8261e-09	-0.441013	0.951	0.994	-0.043	4.11147e-05	1_Resting
Epdr1	1.96806e-09	-0.514058	0.062	0.408	-0.346	4.43108e-05	1_Resting
Anxa8	2.06186e-09	-0.540507	0.012	0.339	-0.327	4.64227e-05	1_Resting
Adamts2	2.09864e-09	-1.02256	0.037	0.362	-0.325	4.72509e-05	1_Resting
Rps7	2.14674e-09	-0.398395	1	0.998	0.002	4.83338e-05	1_Resting
Cdk17	2.20452e-09	-0.328583	0.136	0.525	-0.389	4.96347e-05	1_Resting
Rel	2.33199e-09	-0.30529	0.086	0.463	-0.377	5.25048e-05	1_Resting
Tmod3	2.42717e-09	-0.546209	0.148	0.524	-0.376	5.46478e-05	1_Resting
Dlc1	2.47136e-09	-0.487762	0.358	0.754	-0.396	5.56426e-05	1_Resting
Atp5o.1	2.503e-09	-0.458137	0.802	0.955	-0.153	5.63551e-05	1_Resting
Banf1	2.57397e-09	-0.471839	0.407	0.782	-0.375	5.79529e-05	1_Resting
Cct5	2.60818e-09	-0.479653	0.593	0.879	-0.286	5.87231e-05	1_Resting
Cthrc1	2.65968e-09	0.548678	0.889	0.68	0.209	5.98826e-05	1_Resting
Pmvk	2.67591e-09	-0.504687	0.259	0.635	-0.376	6.02481e-05	1_Resting
Gm17056	2.68819e-09	-0.489424	0.111	0.479	-0.368	6.05245e-05	1_Resting
Arl6ip1	2.73105e-09	-0.465085	0.086	0.435	-0.349	6.14896e-05	1_Resting
Adamts5	2.7545e-09	-0.790636	0.025	0.353	-0.328	6.20175e-05	1_Resting
Psmc2	2.75977e-09	-0.382502	0.259	0.684	-0.425	6.21363e-05	1_Resting
Bnc2	2.84152e-09	0.35343	0.284	0.099	0.185	6.39769e-05	1_Resting
Mme	2.90238e-09	-0.837102	0.037	0.371	-0.334	6.5347e-05	1_Resting
Jund	2.9714e-09	-0.580914	0.802	0.981	-0.179	6.6901e-05	1_Resting
Cpe	3.04042e-09	0.943885	0.963	0.941	0.022	6.84551e-05	1_Resting
Pmpcb	3.14955e-09	-0.298914	0.111	0.503	-0.392	7.09122e-05	1_Resting
Arhgap23	3.16861e-09	-0.343742	0.123	0.51	-0.387	7.13412e-05	1_Resting
Metap2	3.17422e-09	-0.438466	0.531	0.866	-0.335	7.14676e-05	1_Resting
Rpl39	3.20659e-09	-0.351978	1	0.997	0.003	7.21964e-05	1_Resting
Cox6c	3.31952e-09	-0.44586	0.988	0.984	0.004	7.47389e-05	1_Resting
Slc25a13	3.7736e-09	-0.290464	0.012	0.335	-0.323	8.49627e-05	1_Resting
Mageh1	3.84455e-09	0.569005	0.654	0.506	0.148	8.65601e-05	1_Resting
Cap1	3.97002e-09	-0.389958	0.086	0.44	-0.354	8.9385e-05	1_Resting
Eif2s1	3.98723e-09	-0.388643	0.235	0.643	-0.408	8.97725e-05	1_Resting
Loxl3	4.0155e-09	0.632843	0.753	0.635	0.118	9.04091e-05	1_Resting
Ppfibp1	4.07276e-09	-0.415372	0.222	0.62	-0.398	9.16983e-05	1_Resting
Sh3pxd2b	4.37658e-09	-0.566593	0.074	0.4	-0.326	9.85386e-05	1_Resting
Hprt	4.6913e-09	-0.422909	0.296	0.671	-0.375	0.000105625	1_Resting
Msi2	4.74684e-09	0.529687	0.938	0.818	0.12	0.000106875	1_Resting
Reck	4.74987e-09	0.485209	0.506	0.297	0.209	0.000106943	1_Resting
Ehd4	4.89422e-09	-0.368008	0.074	0.412	-0.338	0.000110193	1_Resting
Bnip3l	4.97672e-09	-0.581223	0.568	0.851	-0.283	0.000112051	1_Resting
Rps10	5.04706e-09	-0.361768	1	0.999	0.001	0.000113635	1_Resting
Rnd3	5.09511e-09	-0.43634	0.123	0.493	-0.37	0.000114716	1_Resting
Fdft1	5.19785e-09	-0.376121	0.111	0.478	-0.367	0.00011703	1_Resting
Ube2e3	5.35703e-09	-0.473165	0.346	0.74	-0.394	0.000120614	1_Resting
Nedd8	5.40523e-09	-0.418133	0.827	0.96	-0.133	0.000121699	1_Resting
Camk2d	5.41836e-09	-0.439641	0.272	0.683	-0.411	0.000121994	1_Resting
Rpl36	5.50943e-09	-0.397325	0.988	0.998	-0.01	0.000124045	1_Resting
Nfia	5.58245e-09	0.618924	0.667	0.468	0.199	0.000125689	1_Resting
Hsp90ab1	5.70313e-09	-0.426807	0.975	0.998	-0.023	0.000128406	1_Resting
Hspd1	5.80571e-09	-0.491179	0.593	0.855	-0.262	0.000130716	1_Resting
Pard6g	5.98456e-09	-0.537993	0.025	0.339	-0.314	0.000134742	1_Resting
Calml3	5.98829e-09	0.398829	0.346	0.144	0.202	0.000134826	1_Resting
Zwint	6.06058e-09	-0.375908	0.111	0.471	-0.36	0.000136454	1_Resting
Cwc15	6.09426e-09	-0.418428	0.395	0.766	-0.371	0.000137212	1_Resting
Gpx3	6.17578e-09	-0.959022	0.062	0.382	-0.32	0.000139048	1_Resting
Gars	6.40139e-09	-0.519166	0.42	0.754	-0.334	0.000144127	1_Resting
Rpl34	6.41302e-09	-0.328894	1	0.998	0.002	0.000144389	1_Resting
H2-Ab1	6.71079e-09	-0.777637	0.111	0.449	-0.338	0.000151093	1_Resting
Psmd13	6.9172e-09	-0.437634	0.309	0.72	-0.411	0.000155741	1_Resting
Ube2a	7.47275e-09	-0.355864	0.235	0.633	-0.398	0.000168249	1_Resting
Rps19	7.79817e-09	-0.350858	0.988	0.998	-0.01	0.000175576	1_Resting
Mbnl1	7.92543e-09	0.5978	0.951	0.866	0.085	0.000178441	1_Resting
Pfn1	8.22082e-09	-0.537481	0.901	0.966	-0.065	0.000185092	1_Resting
3110079O15Rik	8.22154e-09	0.716269	1	0.834	0.166	0.000185108	1_Resting
Arpc1a	8.37223e-09	-0.376773	0.284	0.689	-0.405	0.000188501	1_Resting
Epha2	8.78382e-09	-0.388518	0.148	0.52	-0.372	0.000197768	1_Resting
Fosl2	8.96842e-09	-0.416653	0.21	0.612	-0.402	0.000201924	1_Resting
Dhcr24	9.09485e-09	-0.36295	0.099	0.461	-0.362	0.000204771	1_Resting
Airn	9.56242e-09	0.574269	0.593	0.414	0.179	0.000215298	1_Resting
Sertad1	9.67739e-09	-0.394803	0.333	0.79	-0.457	0.000217886	1_Resting
B830012L14Rik	9.81447e-09	0.424749	0.284	0.101	0.183	0.000220973	1_Resting
Runx3	1.03312e-08	-0.489295	0.247	0.611	-0.364	0.000232606	1_Resting
Eef1a1	1.03324e-08	-0.296719	1	1	0	0.000232634	1_Resting
Slit2	1.06214e-08	-0.755976	0.037	0.344	-0.307	0.000239142	1_Resting
Tax1bp1	1.11364e-08	-0.486932	0.519	0.875	-0.356	0.000250735	1_Resting
2310022B05Rik	1.14905e-08	-0.453946	0.259	0.625	-0.366	0.000258708	1_Resting
Mafk	1.19113e-08	-0.343851	0.099	0.458	-0.359	0.000268184	1_Resting
Mlf1	1.2117e-08	-0.489283	0.062	0.387	-0.325	0.000272814	1_Resting
Khdrbs1	1.22029e-08	-0.372639	0.346	0.768	-0.422	0.000274748	1_Resting
Scrg1	1.26937e-08	0.559757	0.938	0.597	0.341	0.000285799	1_Resting
H2-DMb1	1.29614e-08	-0.755429	0.185	0.513	-0.328	0.000291827	1_Resting
Lars2	1.3829e-08	0.599477	0.827	0.764	0.063	0.000311359	1_Resting
Asns	1.39551e-08	-0.507423	0.259	0.604	-0.345	0.000314199	1_Resting
Igf1r	1.40838e-08	-0.552788	0.543	0.836	-0.293	0.000317096	1_Resting
Zc3h15	1.44281e-08	-0.457209	0.469	0.828	-0.359	0.000324849	1_Resting
Hyal2	1.44534e-08	0.345607	0.309	0.12	0.189	0.000325419	1_Resting
Marveld1	1.44634e-08	0.515676	0.679	0.557	0.122	0.000325643	1_Resting
Myl6	1.44787e-08	-0.61507	0.938	0.994	-0.056	0.000325988	1_Resting
Dot1l	1.45387e-08	-0.444225	0.222	0.614	-0.392	0.000327339	1_Resting
Ets1	1.50559e-08	-0.442816	0.16	0.528	-0.368	0.000338984	1_Resting
Sqstm1	1.50721e-08	-0.421253	0.333	0.728	-0.395	0.000339349	1_Resting
Kcmf1	1.51701e-08	-0.387179	0.42	0.795	-0.375	0.000341555	1_Resting
Etf1	1.55535e-08	-0.41665	0.444	0.82	-0.376	0.000350187	1_Resting
Zmiz1	1.64659e-08	0.569608	0.765	0.641	0.124	0.00037073	1_Resting
Arid5b	1.65098e-08	-0.475143	0.074	0.398	-0.324	0.000371719	1_Resting
Ifitm3	1.65813e-08	-1.76969	0.16	0.457	-0.297	0.000373329	1_Resting
Tnfaip2	1.68467e-08	-0.35906	0.049	0.372	-0.323	0.000379304	1_Resting
Tnc	1.68963e-08	-2.89303	0.16	0.457	-0.297	0.000380419	1_Resting
Fkbp2	1.70581e-08	-0.40419	0.321	0.701	-0.38	0.000384063	1_Resting
Ppp1r1b	1.75764e-08	0.474552	0.42	0.218	0.202	0.000395734	1_Resting
Ndufs6	1.78733e-08	-0.431619	0.642	0.888	-0.246	0.000402417	1_Resting
Prrx1	1.83312e-08	-0.829052	0.086	0.4	-0.314	0.000412727	1_Resting
Cdk6	1.84704e-08	-0.419522	0.222	0.591	-0.369	0.00041586	1_Resting
Rpl4	1.8504e-08	-0.404466	0.951	0.996	-0.045	0.000416618	1_Resting
Jpt1	1.87685e-08	-0.496869	0.309	0.675	-0.366	0.000422572	1_Resting
Ndufb6	1.88488e-08	-0.415985	0.407	0.804	-0.397	0.00042438	1_Resting
Sqle	1.88967e-08	-0.368769	0.21	0.577	-0.367	0.000425458	1_Resting
Igsf3	1.92509e-08	-0.454224	0.247	0.635	-0.388	0.000433433	1_Resting
Nectin3	1.92715e-08	-0.369697	0.136	0.497	-0.361	0.000433898	1_Resting
Dnaja1	2.10557e-08	-0.619204	0.654	0.927	-0.273	0.000474069	1_Resting
Hspa8	2.12983e-08	-0.506401	1	0.997	0.003	0.000479531	1_Resting
Rps5	2.15774e-08	-0.397572	1	0.999	0.001	0.000485815	1_Resting
Cpxm1	2.19072e-08	0.631304	0.716	0.538	0.178	0.00049324	1_Resting
Atp2b1	2.20729e-08	-0.518567	0.79	0.921	-0.131	0.000496972	1_Resting
Cp	2.25433e-08	-1.1245	0.062	0.356	-0.294	0.000507561	1_Resting
Mprip	2.26139e-08	-0.509191	0.42	0.782	-0.362	0.000509152	1_Resting
Dph3	2.27137e-08	-0.408173	0.383	0.747	-0.364	0.0005114	1_Resting
Myl12a	2.38673e-08	-0.545532	0.84	0.96	-0.12	0.000537372	1_Resting
Eif6	2.39729e-08	-0.430567	0.383	0.762	-0.379	0.00053975	1_Resting
Vapa	2.46494e-08	-0.485746	0.679	0.889	-0.21	0.000554982	1_Resting
Fgfr1	2.48207e-08	0.601977	0.877	0.754	0.123	0.000558838	1_Resting
Cenpw	2.49423e-08	-0.389725	0.037	0.343	-0.306	0.000561576	1_Resting
Nhp2	2.54713e-08	-0.439551	0.407	0.746	-0.339	0.000573487	1_Resting
Fscn1	2.60577e-08	-0.518527	0.58	0.846	-0.266	0.000586689	1_Resting
Yipf1	2.67926e-08	-0.394404	0.284	0.651	-0.367	0.000603235	1_Resting
Clta	2.85194e-08	-0.447545	0.852	0.956	-0.104	0.000642114	1_Resting
Ccdc124	2.85584e-08	-0.341848	0.198	0.578	-0.38	0.000642992	1_Resting
Pltp	2.92678e-08	-0.390279	0.025	0.326	-0.301	0.000658965	1_Resting
Cnpy2	2.96911e-08	0.457285	0.975	0.951	0.024	0.000668494	1_Resting
Fkbp11	2.98551e-08	-0.784602	0.667	0.836	-0.169	0.000672188	1_Resting
Cdh11	3.02449e-08	-1.37334	0.136	0.414	-0.278	0.000680965	1_Resting
Rpl22	3.1419e-08	-0.384682	1	0.996	0.004	0.000707399	1_Resting
Psma5	3.27954e-08	-0.440588	0.543	0.862	-0.319	0.000738388	1_Resting
Mmp13	3.317e-08	-3.63297	0.099	0.394	-0.295	0.000746823	1_Resting
Ywhae	3.32948e-08	-0.379069	0.938	0.976	-0.038	0.000749633	1_Resting
Hspa9	3.39469e-08	-0.468749	0.519	0.851	-0.332	0.000764314	1_Resting
Trim47	3.40553e-08	-0.400497	0.173	0.532	-0.359	0.000766756	1_Resting
Rbms1	3.52567e-08	-0.570351	0.222	0.572	-0.35	0.000793804	1_Resting
Nudt4	3.64106e-08	-0.847293	0.296	0.64	-0.344	0.000819786	1_Resting
Rpl13a	3.76281e-08	-0.440346	0.778	0.952	-0.174	0.000847198	1_Resting
Extl1	3.88528e-08	0.598255	0.444	0.251	0.193	0.000874771	1_Resting
Nfat5	4.0067e-08	0.556185	0.901	0.858	0.043	0.000902109	1_Resting
Omd	4.06401e-08	1.72916	0.481	0.298	0.183	0.000915011	1_Resting
Rps24	4.26714e-08	-0.345896	1	1	0	0.000960746	1_Resting
Cks2	4.27067e-08	-0.793542	0.21	0.552	-0.342	0.00096154	1_Resting
Manf	4.29645e-08	-0.599962	0.827	0.929	-0.102	0.000967346	1_Resting
Timm13	4.52079e-08	-0.416464	0.741	0.931	-0.19	0.00101786	1_Resting
Vcl	4.95023e-08	-0.407698	0.16	0.509	-0.349	0.00111455	1_Resting
Fry	4.96021e-08	0.670632	0.593	0.446	0.147	0.00111679	1_Resting
Dapk2	4.97482e-08	-0.614194	0.012	0.293	-0.281	0.00112008	1_Resting
Dars	5.00792e-08	-0.308011	0.173	0.551	-0.378	0.00112753	1_Resting
Adipor2	5.04863e-08	-0.339549	0.173	0.546	-0.373	0.0011367	1_Resting
Slc38a4	5.10877e-08	-0.367879	0.173	0.531	-0.358	0.00115024	1_Resting
Rpl5	5.2354e-08	-0.348469	1	0.996	0.004	0.00117875	1_Resting
Spp1	5.32547e-08	-4.99069	0.469	0.736	-0.267	0.00119903	1_Resting
Bmp2	5.51105e-08	-0.419796	0.074	0.391	-0.317	0.00124081	1_Resting
Ninj2	5.73915e-08	0.325519	0.321	0.139	0.182	0.00129217	1_Resting
Cxadr	5.83294e-08	0.335393	0.358	0.159	0.199	0.00131329	1_Resting
Eif3b	5.84359e-08	-0.428073	0.444	0.791	-0.347	0.00131568	1_Resting
Pdcd6ip	6.07745e-08	-0.38517	0.358	0.726	-0.368	0.00136834	1_Resting
Fkbp14	6.29358e-08	0.460061	0.802	0.727	0.075	0.001417	1_Resting
Rps3	6.32821e-08	-0.301276	1	0.999	0.001	0.0014248	1_Resting
Rheb	6.37756e-08	-0.457527	0.593	0.874	-0.281	0.00143591	1_Resting
Vegfa	6.59727e-08	-0.562575	0.395	0.747	-0.352	0.00148538	1_Resting
Fyn	6.76133e-08	-0.401521	0.16	0.494	-0.334	0.00152231	1_Resting
Id3	6.82755e-08	-0.925364	0.716	0.894	-0.178	0.00153722	1_Resting
P3h3	6.8515e-08	0.483718	0.877	0.853	0.024	0.00154261	1_Resting
Lpcat3	6.98485e-08	-0.259819	0.074	0.391	-0.317	0.00157264	1_Resting
Sfxn1	7.19526e-08	-0.35171	0.247	0.621	-0.374	0.00162001	1_Resting
Maf	7.27333e-08	-0.630329	0.099	0.405	-0.306	0.00163759	1_Resting
Pgm2	7.43525e-08	-0.36016	0.185	0.53	-0.345	0.00167405	1_Resting
Atf4	7.4378e-08	-0.421167	0.988	0.981	0.007	0.00167462	1_Resting
Fabp5	7.48779e-08	-0.797415	0.21	0.542	-0.332	0.00168588	1_Resting
Smoc1	7.49627e-08	0.735499	0.469	0.263	0.206	0.00168779	1_Resting
Rnf149	7.59198e-08	-0.404591	0.309	0.691	-0.382	0.00170933	1_Resting
Strap	7.64288e-08	-0.413955	0.457	0.826	-0.369	0.0017208	1_Resting
Rpl35	7.65656e-08	-0.343289	0.975	0.995	-0.02	0.00172387	1_Resting
Nme1	7.67247e-08	-0.529465	0.926	0.943	-0.017	0.00172746	1_Resting
Eif4a2	7.69239e-08	0.525747	0.852	0.835	0.017	0.00173194	1_Resting
Eif3a	7.76114e-08	-0.436107	0.716	0.939	-0.223	0.00174742	1_Resting
Cops8	7.99832e-08	-0.349913	0.272	0.667	-0.395	0.00180082	1_Resting
Smad7	8.20266e-08	-0.481028	0.519	0.837	-0.318	0.00184683	1_Resting
Ugdh	8.34631e-08	-0.513283	0.704	0.88	-0.176	0.00187917	1_Resting
Myo18a	8.42888e-08	-0.253389	0.148	0.501	-0.353	0.00189776	1_Resting
Psmb7	8.46508e-08	-0.359723	0.494	0.824	-0.33	0.00190591	1_Resting
Psmc5	8.57824e-08	-0.382776	0.383	0.743	-0.36	0.00193139	1_Resting
Hddc2	8.63761e-08	-0.270191	0.123	0.468	-0.345	0.00194476	1_Resting
H2-D1	8.66192e-08	-0.73955	0.185	0.499	-0.314	0.00195023	1_Resting
Cmc1	8.70051e-08	-0.251714	0.111	0.453	-0.342	0.00195892	1_Resting
Fbxo28	8.76135e-08	-0.259901	0.037	0.329	-0.292	0.00197262	1_Resting
Larp4b	9.03015e-08	-0.313067	0.259	0.643	-0.384	0.00203314	1_Resting
Hmox1	9.06535e-08	-0.391898	0.099	0.432	-0.333	0.00204106	1_Resting
Ndufb7	9.14708e-08	-0.360051	0.593	0.879	-0.286	0.00205947	1_Resting
P4ha2	9.21344e-08	-0.754914	0.593	0.786	-0.193	0.00207441	1_Resting
Hint1	9.4333e-08	-0.417279	0.914	0.983	-0.069	0.00212391	1_Resting
Pygl	9.82982e-08	-0.400522	0.21	0.562	-0.352	0.00221318	1_Resting
Ppp1r12a	1.00565e-07	-0.382068	0.272	0.657	-0.385	0.00226421	1_Resting
Rock2	1.00693e-07	-0.517257	0.605	0.886	-0.281	0.00226711	1_Resting
Arpc2	1.07074e-07	-0.459144	0.728	0.936	-0.208	0.00241076	1_Resting
Clmn	1.07269e-07	0.348093	0.21	0.067	0.143	0.00241516	1_Resting
Rpl12	1.14697e-07	-0.367235	0.988	0.998	-0.01	0.00258239	1_Resting
Ghitm	1.1752e-07	-0.412093	0.346	0.723	-0.377	0.00264596	1_Resting
Cd44	1.1871e-07	-0.470056	0.086	0.396	-0.31	0.00267275	1_Resting
Ifitm2	1.19628e-07	0.474501	0.963	0.962	0.001	0.00269342	1_Resting
H2-Q7	1.21222e-07	-0.290335	0.012	0.285	-0.273	0.00272932	1_Resting
Slc7a1	1.21746e-07	-0.365681	0.259	0.632	-0.373	0.00274111	1_Resting
Eloc	1.22599e-07	-0.401209	0.691	0.898	-0.207	0.00276033	1_Resting
Eif3k	1.24961e-07	-0.374152	0.815	0.967	-0.152	0.00281349	1_Resting
Tdg	1.26336e-07	-0.245974	0.074	0.384	-0.31	0.00284446	1_Resting
Rps26	1.27735e-07	-0.409171	0.988	0.998	-0.01	0.00287595	1_Resting
S1pr3	1.29933e-07	-0.599095	0.012	0.282	-0.27	0.00292545	1_Resting
Ddx21	1.30503e-07	-0.276833	0.198	0.579	-0.381	0.00293828	1_Resting
Slc35b1	1.34729e-07	-0.388965	0.272	0.629	-0.357	0.00303343	1_Resting
Klf7	1.36834e-07	-0.309371	0.222	0.604	-0.382	0.00308081	1_Resting
Pim3	1.39308e-07	-0.45544	0.346	0.69	-0.344	0.00313653	1_Resting
Vmp1	1.39811e-07	-0.389684	0.296	0.664	-0.368	0.00314785	1_Resting
Irx3	1.40082e-07	-0.458232	0.025	0.297	-0.272	0.00315394	1_Resting
Tmem160	1.41623e-07	-0.325936	0.259	0.637	-0.378	0.00318864	1_Resting
Col8a2	1.42406e-07	0.49814	0.222	0.075	0.147	0.00320628	1_Resting
Cebpg	1.49277e-07	-0.269572	0.16	0.508	-0.348	0.00336098	1_Resting
Tcp11l2	1.50466e-07	-0.327137	0.086	0.397	-0.311	0.00338774	1_Resting
Timm22	1.51278e-07	-0.257151	0.173	0.548	-0.375	0.00340602	1_Resting
Serbp1	1.52762e-07	-0.388091	0.926	0.975	-0.049	0.00343944	1_Resting
Atp1b3	1.55034e-07	-0.512622	0.444	0.789	-0.345	0.0034906	1_Resting
Aprt	1.5565e-07	-0.46742	0.568	0.836	-0.268	0.00350447	1_Resting
Eif2a	1.64816e-07	-0.25612	0.185	0.555	-0.37	0.00371084	1_Resting
C530008M17Rik	1.69461e-07	0.327328	0.222	0.076	0.146	0.00381542	1_Resting
Abl2	1.73971e-07	-0.345581	0.074	0.371	-0.297	0.00391696	1_Resting
Lmo4	1.77772e-07	0.6329	0.741	0.696	0.045	0.00400255	1_Resting
Rplp2	1.77836e-07	-0.275668	1	0.999	0.001	0.00400397	1_Resting
Ikbip	1.79258e-07	0.500505	0.852	0.789	0.063	0.004036	1_Resting
Ahnak	1.80132e-07	-0.573089	0.704	0.917	-0.213	0.00405568	1_Resting
Atp5f1	1.84836e-07	-0.368181	0.877	0.961	-0.084	0.00416158	1_Resting
Sdcbp	1.87289e-07	-0.35189	0.432	0.813	-0.381	0.00421682	1_Resting
Ccdc12	2.00502e-07	-0.460103	0.259	0.604	-0.345	0.00451429	1_Resting
Ptx3	2.02883e-07	-0.682088	0.062	0.345	-0.283	0.0045679	1_Resting
Ugp2	2.035e-07	-0.538334	0.407	0.749	-0.342	0.0045818	1_Resting
Lbh	2.05313e-07	-0.48151	0.321	0.656	-0.335	0.00462262	1_Resting
Atp5g3	2.12628e-07	-0.38634	0.815	0.94	-0.125	0.00478733	1_Resting
Atp5g2	2.18752e-07	-0.337461	0.963	0.982	-0.019	0.00492519	1_Resting
Psmb3	2.28156e-07	-0.490018	0.691	0.919	-0.228	0.00513693	1_Resting
Myo1e	2.33056e-07	-0.261067	0.123	0.462	-0.339	0.00524726	1_Resting
Ube2f	2.417e-07	-0.302197	0.185	0.531	-0.346	0.00544187	1_Resting
Supt3	2.47524e-07	-0.249891	0.062	0.363	-0.301	0.005573	1_Resting
Snrpd1	2.49324e-07	-0.444855	0.679	0.889	-0.21	0.00561354	1_Resting
Fkbp1a	2.5047e-07	-0.351892	0.753	0.912	-0.159	0.00563933	1_Resting
Pa2g4	2.50547e-07	-0.358669	0.321	0.675	-0.354	0.00564106	1_Resting
Psme4	2.58746e-07	-0.352421	0.272	0.643	-0.371	0.00582568	1_Resting
Eif4e	2.64868e-07	-0.44473	0.444	0.787	-0.343	0.00596351	1_Resting
Ibsp	2.68081e-07	-3.65081	0.198	0.456	-0.258	0.00603583	1_Resting
Psmc1	2.69058e-07	-0.305439	0.296	0.665	-0.369	0.00605785	1_Resting
Atpif1	2.76053e-07	-0.440755	0.864	0.969	-0.105	0.00621534	1_Resting
Lox	2.76258e-07	-1.19982	0.111	0.398	-0.287	0.00621995	1_Resting
Braf	2.84188e-07	-0.244836	0.136	0.467	-0.331	0.00639849	1_Resting
Coro1b	2.86413e-07	-0.246347	0.074	0.38	-0.306	0.00644859	1_Resting
Nap1l1	2.87308e-07	-0.470383	0.728	0.925	-0.197	0.00646874	1_Resting
Slc25a4	2.91494e-07	-0.358266	0.914	0.982	-0.068	0.00656299	1_Resting
Fndc3a	2.93632e-07	-0.373715	0.272	0.64	-0.368	0.00661112	1_Resting
2010111I01Rik	2.99083e-07	0.516882	0.704	0.605	0.099	0.00673386	1_Resting
Azin1	2.99094e-07	-0.398537	0.519	0.875	-0.356	0.00673409	1_Resting
Sh3bp5	3.01862e-07	-0.245979	0.025	0.296	-0.271	0.00679642	1_Resting
Rela	3.06997e-07	-0.242506	0.123	0.449	-0.326	0.00691203	1_Resting
Gclm	3.12638e-07	-0.28289	0.123	0.446	-0.323	0.00703904	1_Resting
Gnb1	3.15447e-07	-0.374045	0.778	0.933	-0.155	0.00710229	1_Resting
Sptlc2	3.20321e-07	-0.313186	0.148	0.474	-0.326	0.00721203	1_Resting
Dnajb9	3.20584e-07	-0.524971	0.321	0.654	-0.333	0.00721795	1_Resting
Cdc42	3.25997e-07	-0.408017	0.84	0.963	-0.123	0.00733983	1_Resting
Ackr3	3.26565e-07	-0.534314	0.136	0.432	-0.296	0.00735261	1_Resting
Eml4	3.32742e-07	-0.305691	0.123	0.446	-0.323	0.00749168	1_Resting
Dyrk2	3.35502e-07	-0.296274	0.173	0.505	-0.332	0.00755382	1_Resting
Tpm3	3.35867e-07	-0.379951	0.58	0.874	-0.294	0.00756204	1_Resting
Rab11fip4	3.40713e-07	0.54211	0.444	0.269	0.175	0.00767115	1_Resting
2810474O19Rik	3.41859e-07	-0.649481	0.321	0.629	-0.308	0.00769696	1_Resting
Rpl39l	3.44254e-07	-0.549436	0.049	0.322	-0.273	0.00775087	1_Resting
Mif	3.45953e-07	-0.928092	0.963	0.956	0.007	0.00778914	1_Resting
Acadl	3.4922e-07	-0.28444	0.123	0.442	-0.319	0.00786268	1_Resting
Xpnpep1	3.54488e-07	-0.257598	0.16	0.517	-0.357	0.0079813	1_Resting
Pkp4	3.62169e-07	-0.268004	0.012	0.268	-0.256	0.00815423	1_Resting
Rps25	3.65162e-07	-0.383142	0.988	0.996	-0.008	0.00822161	1_Resting
Fam19a5	3.67217e-07	0.260247	0.259	0.1	0.159	0.00826789	1_Resting
Fxyd6	3.71572e-07	0.558834	0.728	0.532	0.196	0.00836593	1_Resting
Rps4x	3.83066e-07	-0.292166	1	0.999	0.001	0.00862473	1_Resting
Rala	3.88812e-07	-0.374654	0.395	0.729	-0.334	0.0087541	1_Resting
Rps28	3.90849e-07	-0.301856	0.988	0.997	-0.009	0.00879996	1_Resting
Odc1	3.94303e-07	-0.524689	0.778	0.904	-0.126	0.00887774	1_Resting
Atf6	4.00957e-07	-0.280916	0.111	0.427	-0.316	0.00902754	1_Resting
Il17d	4.01236e-07	0.752568	0.494	0.337	0.157	0.00903384	1_Resting
Slc16a3	4.07238e-07	-0.652382	0.235	0.527	-0.292	0.00916897	1_Resting
Mrps33	4.10658e-07	-0.344662	0.469	0.814	-0.345	0.00924598	1_Resting
Il11ra1	4.17783e-07	0.486671	0.519	0.368	0.151	0.00940639	1_Resting
N6amt1	4.25093e-07	-0.255313	0.099	0.405	-0.306	0.00957096	1_Resting
Dnajc21	4.32763e-07	-0.297229	0.198	0.527	-0.329	0.00974366	1_Resting
Pdha1	4.33232e-07	-0.302641	0.235	0.601	-0.366	0.00975422	1_Resting
Rex1bd	4.34735e-07	-0.409292	0.531	0.855	-0.324	0.00978807	1_Resting
Ywhah	4.46137e-07	-0.437817	0.321	0.659	-0.338	0.0100448	1_Resting
Slc35g1	4.50415e-07	-0.3372	0.111	0.414	-0.303	0.0101411	1_Resting
Cd81	4.5368e-07	0.34502	0.975	0.976	-0.001	0.0102146	1_Resting
Sdhc	4.61604e-07	-0.288287	0.247	0.61	-0.363	0.010393	1_Resting
Mras	4.63025e-07	-0.252361	0.099	0.407	-0.308	0.010425	1_Resting
Cybrd1	4.70616e-07	0.412475	0.444	0.267	0.177	0.0105959	1_Resting
Eif4a3	4.75097e-07	-0.302484	0.321	0.68	-0.359	0.0106968	1_Resting
Vcp	4.7651e-07	-0.448534	0.716	0.951	-0.235	0.0107286	1_Resting
Shf	4.7872e-07	-0.222794	0.086	0.388	-0.302	0.0107784	1_Resting
Atp5l	4.97461e-07	-0.35107	0.938	0.987	-0.049	0.0112003	1_Resting
Trib3	4.98248e-07	-0.281822	0.012	0.264	-0.252	0.011218	1_Resting
Pafah1b1	5.07647e-07	-0.380186	0.543	0.856	-0.313	0.0114297	1_Resting
Nrbp2	5.24895e-07	0.553755	0.58	0.454	0.126	0.011818	1_Resting
P3h4	5.36354e-07	0.46764	0.926	0.87	0.056	0.012076	1_Resting
Pdlim5	5.53492e-07	-0.342391	0.074	0.366	-0.292	0.0124619	1_Resting
Hist1h1c	5.62322e-07	-0.861341	0.37	0.647	-0.277	0.0126607	1_Resting
Ostc	5.75572e-07	-0.363676	0.938	0.975	-0.037	0.012959	1_Resting
mt-Atp8	5.77574e-07	0.691266	0.691	0.628	0.063	0.0130041	1_Resting
Rab3gap1	5.79132e-07	-0.213473	0.086	0.389	-0.303	0.0130391	1_Resting
Slit3	5.80922e-07	-0.463398	0.037	0.295	-0.258	0.0130795	1_Resting
Tm4sf1	5.86149e-07	-0.593965	0.099	0.373	-0.274	0.0131971	1_Resting
Lrig3	5.90507e-07	0.538992	0.407	0.237	0.17	0.0132953	1_Resting
Dusp1	6.10345e-07	-0.292356	0.395	0.703	-0.308	0.0137419	1_Resting
Snhg18	6.16978e-07	0.463329	0.938	0.882	0.056	0.0138913	1_Resting
Plod3	6.1813e-07	-0.268202	0.296	0.658	-0.362	0.0139172	1_Resting
Thbs3	6.35551e-07	0.549694	0.84	0.688	0.152	0.0143094	1_Resting
Chchd3	6.35775e-07	-0.242293	0.16	0.487	-0.327	0.0143145	1_Resting
Actr3	6.38738e-07	-0.395026	0.617	0.883	-0.266	0.0143812	1_Resting
Psap	6.40702e-07	0.361527	0.951	0.949	0.002	0.0144254	1_Resting
Exoc5	6.51971e-07	-0.335332	0.222	0.563	-0.341	0.0146791	1_Resting
Psmd3	6.59631e-07	-0.353232	0.37	0.741	-0.371	0.0148516	1_Resting
Clu	6.77133e-07	0.672591	0.469	0.259	0.21	0.0152457	1_Resting
Cebpd	6.86677e-07	-0.386092	0.346	0.72	-0.374	0.0154605	1_Resting
Dhx32	6.87374e-07	-0.315003	0.111	0.406	-0.295	0.0154762	1_Resting
Psmc3	7.01866e-07	-0.333838	0.469	0.782	-0.313	0.0158025	1_Resting
Hbb-bs	7.20473e-07	-0.833261	0.988	0.968	0.02	0.0162214	1_Resting
Ptpn1	7.26714e-07	-0.412527	0.272	0.613	-0.341	0.016362	1_Resting
Sox5	7.40766e-07	0.485887	0.778	0.575	0.203	0.0166783	1_Resting
Ranbp1	7.41721e-07	-0.425234	0.753	0.901	-0.148	0.0166999	1_Resting
C1qtnf4	7.52702e-07	0.506611	0.63	0.478	0.152	0.0169471	1_Resting
Mark3	7.61916e-07	-0.289168	0.272	0.647	-0.375	0.0171545	1_Resting
Myo1b	7.83087e-07	-0.471819	0.074	0.336	-0.262	0.0176312	1_Resting
Heyl	7.92552e-07	-0.332014	0.049	0.312	-0.263	0.0178443	1_Resting
Plaur	8.1067e-07	-0.448406	0.099	0.374	-0.275	0.0182522	1_Resting
Mrps26	8.27704e-07	-0.226879	0.222	0.593	-0.371	0.0186358	1_Resting
Tcn2	8.32293e-07	-0.347307	0.099	0.39	-0.291	0.0187391	1_Resting
Lef1	8.40464e-07	0.492981	0.481	0.3	0.181	0.0189231	1_Resting
Csnk1g3	8.41989e-07	-0.294359	0.259	0.598	-0.339	0.0189574	1_Resting
Mgarp	8.5021e-07	-0.303787	0.099	0.39	-0.291	0.0191425	1_Resting
Mbd2	8.54065e-07	-0.40598	0.444	0.751	-0.307	0.0192293	1_Resting
Gatad2a	8.70333e-07	-0.268975	0.222	0.56	-0.338	0.0195955	1_Resting
Scube1	8.75498e-07	-0.243004	0.025	0.281	-0.256	0.0197118	1_Resting
Adrm1	8.95106e-07	-0.29316	0.247	0.587	-0.34	0.0201533	1_Resting
Nipsnap3b	9.00895e-07	-0.20865	0.062	0.344	-0.282	0.0202837	1_Resting
Acsl5	9.37185e-07	-0.218863	0	0.234	-0.234	0.0211007	1_Resting
Lactb2	9.50479e-07	-0.204895	0.025	0.278	-0.253	0.0214	1_Resting
Blvrb	9.54207e-07	-0.347901	0.21	0.533	-0.323	0.021484	1_Resting
Mocs2	9.55327e-07	-0.306071	0.21	0.531	-0.321	0.0215092	1_Resting
Tuba1b	9.61803e-07	-0.748658	0.593	0.836	-0.243	0.021655	1_Resting
P3h2	9.63739e-07	-0.556594	0.136	0.4	-0.264	0.0216986	1_Resting
S100a13	9.76914e-07	-0.509966	0.543	0.849	-0.306	0.0219952	1_Resting
Mrpl35	9.96045e-07	-0.276273	0.198	0.542	-0.344	0.0224259	1_Resting
Hmgb1	1.00648e-06	-0.526569	0.951	0.987	-0.036	0.0226609	1_Resting
Metrnl	1.01515e-06	-0.482907	0.148	0.44	-0.292	0.0228561	1_Resting
Glrx3	1.01675e-06	-0.34087	0.543	0.842	-0.299	0.022892	1_Resting
Iah1	1.02053e-06	-0.267986	0.086	0.376	-0.29	0.0229772	1_Resting
Pim1	1.03386e-06	-0.591398	0.284	0.594	-0.31	0.0232773	1_Resting
Eif4ebp1	1.04842e-06	-0.498533	0.444	0.772	-0.328	0.0236053	1_Resting
Ifngr1	1.05556e-06	-0.343012	0.123	0.419	-0.296	0.023766	1_Resting
Aldoa	1.06378e-06	-0.68499	0.778	0.918	-0.14	0.023951	1_Resting
Crebrf	1.06447e-06	-0.282177	0.136	0.446	-0.31	0.0239666	1_Resting
Rps27a	1.07332e-06	-0.278447	1	1	0	0.0241657	1_Resting
Sparcl1	1.08083e-06	0.516806	0.605	0.416	0.189	0.0243349	1_Resting
Tomm70a	1.0948e-06	-0.26842	0.21	0.559	-0.349	0.0246494	1_Resting
Ndufs2	1.10826e-06	-0.397248	0.531	0.829	-0.298	0.0249524	1_Resting
S100b	1.11063e-06	0.643322	0.827	0.678	0.149	0.0250058	1_Resting
Sub1	1.11661e-06	-0.387994	0.877	0.969	-0.092	0.0251405	1_Resting
Jam2	1.16231e-06	0.308375	0.309	0.135	0.174	0.0261695	1_Resting
Nrm	1.17212e-06	-0.243973	0.074	0.348	-0.274	0.0263902	1_Resting
Ero1l	1.17612e-06	-0.398401	0.198	0.522	-0.324	0.0264803	1_Resting
Gpi1	1.18043e-06	-0.338278	0.593	0.843	-0.25	0.0265774	1_Resting
Smarcb1	1.20935e-06	-0.304328	0.309	0.664	-0.355	0.0272285	1_Resting
Rps15	1.22498e-06	-0.312874	1	0.999	0.001	0.0275804	1_Resting
Dnlz	1.2626e-06	-0.277439	0.235	0.567	-0.332	0.0284275	1_Resting
Tmem123	1.30142e-06	-0.323521	0.049	0.305	-0.256	0.0293016	1_Resting
Ndufa9	1.31839e-06	-0.27345	0.247	0.608	-0.361	0.0296836	1_Resting
Igdcc4	1.32738e-06	0.469644	0.469	0.31	0.159	0.0298861	1_Resting
Elmo1	1.32852e-06	-0.310357	0	0.229	-0.229	0.0299117	1_Resting
Inpp5a	1.35674e-06	-0.253228	0.123	0.426	-0.303	0.030547	1_Resting
Kctd14	1.36443e-06	0.256875	0.235	0.091	0.144	0.0307202	1_Resting
P3h1	1.37362e-06	0.426561	0.926	0.896	0.03	0.0309271	1_Resting
Gm13889	1.38789e-06	-0.484208	0.025	0.267	-0.242	0.0312483	1_Resting
Chac1	1.39392e-06	-0.284269	0.062	0.336	-0.274	0.031384	1_Resting
Bbc3	1.39392e-06	-0.213962	0.025	0.274	-0.249	0.0313841	1_Resting
Gfer	1.39592e-06	-0.201248	0.123	0.427	-0.304	0.0314292	1_Resting
Cdk5rap2	1.42955e-06	-0.254075	0.049	0.308	-0.259	0.0321862	1_Resting
Snx2	1.4428e-06	-0.269233	0.136	0.439	-0.303	0.0324846	1_Resting
Ldlr	1.44556e-06	-0.273013	0.407	0.726	-0.319	0.0325467	1_Resting
Rpp21	1.45963e-06	-0.265073	0.185	0.505	-0.32	0.0328636	1_Resting
Rbm22	1.50747e-06	-0.239572	0.198	0.527	-0.329	0.0339406	1_Resting
Klhl13	1.53763e-06	-0.243731	0.136	0.451	-0.315	0.0346197	1_Resting
Sae1	1.54321e-06	-0.342345	0.21	0.524	-0.314	0.0347454	1_Resting
Snrpa1	1.55073e-06	-0.30296	0.321	0.674	-0.353	0.0349147	1_Resting
Gsk3b	1.56991e-06	-0.403973	0.383	0.743	-0.36	0.0353465	1_Resting
Cpxm2	1.57016e-06	0.454583	0.383	0.212	0.171	0.0353522	1_Resting
Hmgb2	1.59542e-06	-1.05301	0.642	0.883	-0.241	0.0359208	1_Resting
Ube2l3	1.60156e-06	-0.338439	0.605	0.869	-0.264	0.0360591	1_Resting
Nt5c	1.60828e-06	-0.248273	0.123	0.422	-0.299	0.0362103	1_Resting
Adam10	1.66355e-06	-0.367387	0.099	0.374	-0.275	0.0374548	1_Resting
Txndc17	1.6663e-06	-0.362931	0.63	0.882	-0.252	0.0375166	1_Resting
Sbds	1.66675e-06	-0.214394	0.074	0.358	-0.284	0.0375268	1_Resting
M1ap	1.69231e-06	-0.410847	0.086	0.357	-0.271	0.0381024	1_Resting
Emc2	1.69706e-06	-0.281035	0.198	0.524	-0.326	0.0382093	1_Resting
Irx5	1.70981e-06	-0.344487	0.012	0.245	-0.233	0.0384965	1_Resting
Itpkb	1.72084e-06	0.371228	0.383	0.209	0.174	0.0387446	1_Resting
Ap2s1	1.72772e-06	-0.439842	0.321	0.654	-0.333	0.0388996	1_Resting
Cd1d1	1.75491e-06	-0.397468	0.012	0.246	-0.234	0.0395118	1_Resting
Smad4	1.76021e-06	-0.215885	0.222	0.589	-0.367	0.0396312	1_Resting
Pgk1	1.77248e-06	-1.17776	0.827	0.885	-0.058	0.0399075	1_Resting
Csnk2a2	1.80223e-06	-0.299913	0.259	0.601	-0.342	0.0405771	1_Resting
Pth1r	1.85466e-06	-0.856009	0.716	0.855	-0.139	0.0417577	1_Resting
Klf3	1.86107e-06	-0.445463	0.296	0.614	-0.318	0.0419021	1_Resting
Txnl1	1.89858e-06	-0.363231	0.679	0.872	-0.193	0.0427466	1_Resting
Dazap2	1.90714e-06	-0.332338	0.309	0.65	-0.341	0.0429392	1_Resting
Smtn	1.92008e-06	-0.239711	0.16	0.489	-0.329	0.0432305	1_Resting
Zfhx3	1.93579e-06	0.432547	0.728	0.65	0.078	0.0435844	1_Resting
Ctnna1	1.94807e-06	-0.370197	0.432	0.748	-0.316	0.0438608	1_Resting
Frzb	1.96174e-06	1.21395	0.432	0.278	0.154	0.0441687	1_Resting
Tiam2	1.97104e-06	-0.416933	0.383	0.692	-0.309	0.044378	1_Resting
Ttc39b	1.98512e-06	-0.24091	0.086	0.368	-0.282	0.044695	1_Resting
Pqlc1	2.01036e-06	-0.269379	0.123	0.42	-0.297	0.0452632	1_Resting
Med7	2.02821e-06	-0.234507	0.099	0.374	-0.275	0.0456651	1_Resting
Arpp19	2.03266e-06	-0.371986	0.556	0.814	-0.258	0.0457653	1_Resting
Anxa3	2.09104e-06	-0.333985	0.025	0.266	-0.241	0.0470798	1_Resting
Ipo5	2.09312e-06	-0.296101	0.333	0.679	-0.346	0.0471266	1_Resting
Dusp8	2.10985e-06	-0.256933	0.049	0.306	-0.257	0.0475032	1_Resting
Magohb	2.12614e-06	-0.236612	0.198	0.523	-0.325	0.0478701	1_Resting
Trp53bp2	2.13097e-06	-0.221476	0.049	0.308	-0.259	0.0479788	1_Resting
Eprs	2.17948e-06	-0.401546	0.704	0.904	-0.2	0.0490711	1_Resting
Lyn	2.19089e-06	-0.202109	0.049	0.305	-0.256	0.0493278	1_Resting
Dlx5	2.21643e-06	-0.286622	0.074	0.334	-0.26	0.049903	1_Resting
Ctsc	2.24432e-06	-0.735394	0.062	0.3	-0.238	0.0505309	1_Resting
Gtf2b	2.27447e-06	-0.363112	0.296	0.619	-0.323	0.0512096	1_Resting
Piezo1	2.28294e-06	-0.310024	0.296	0.651	-0.355	0.0514005	1_Resting
Eef1b2	2.30283e-06	-0.292779	0.988	0.997	-0.009	0.0518483	1_Resting
Rpl38	2.30924e-06	-0.275095	1	0.998	0.002	0.0519924	1_Resting
Ndufb2	2.31103e-06	-0.406259	0.63	0.88	-0.25	0.0520328	1_Resting
Npdc1	2.34262e-06	0.390478	0.37	0.185	0.185	0.0527441	1_Resting
Slc3a2	2.34369e-06	-0.374111	0.605	0.853	-0.248	0.0527681	1_Resting
Mical3	2.34734e-06	-0.302531	0.086	0.35	-0.264	0.0528505	1_Resting
Noct	2.36001e-06	-0.268853	0.111	0.398	-0.287	0.0531356	1_Resting
Csnk1d	2.37093e-06	-0.292772	0.247	0.585	-0.338	0.0533815	1_Resting
Id2	2.39112e-06	-0.404291	0.395	0.722	-0.327	0.053836	1_Resting
Nrp2	2.42205e-06	-0.898949	0.136	0.381	-0.245	0.0545325	1_Resting
Birc5	2.42788e-06	-0.677124	0	0.22	-0.22	0.0546637	1_Resting
Eif4ebp2	2.43227e-06	-0.259421	0.21	0.545	-0.335	0.0547626	1_Resting
Dpp3	2.43609e-06	-0.229123	0.111	0.4	-0.289	0.0548486	1_Resting
Postn	2.48178e-06	-1.20058	0.037	0.272	-0.235	0.0558774	1_Resting
Coq7	2.50691e-06	-0.251215	0.173	0.489	-0.316	0.056443	1_Resting
Txnrd1	2.52638e-06	-0.343822	0.247	0.571	-0.324	0.0568815	1_Resting
Lonp1	2.57493e-06	-0.253226	0.136	0.433	-0.297	0.0579745	1_Resting
Tmem176a	2.60222e-06	-0.713992	0.617	0.856	-0.239	0.058589	1_Resting
Atp5a1	2.62686e-06	-0.358928	0.926	0.986	-0.06	0.0591437	1_Resting
Dnajc15	2.65279e-06	-0.277649	0.235	0.567	-0.332	0.0597276	1_Resting
Angptl4	2.70698e-06	-0.612136	0.049	0.284	-0.235	0.0609476	1_Resting
Sox11	2.71052e-06	0.603076	0.593	0.429	0.164	0.0610274	1_Resting
Got2	2.81298e-06	-0.240594	0.185	0.523	-0.338	0.0633342	1_Resting
2005-03-01	2.85978e-06	-0.297677	0.309	0.659	-0.35	0.0643879	1_Resting
Hpgd	2.93575e-06	-0.716003	0.086	0.325	-0.239	0.0660984	1_Resting
Snrpf	3.01755e-06	-0.35919	0.79	0.942	-0.152	0.0679401	1_Resting
Plcd1	3.0396e-06	-0.308522	0.222	0.529	-0.307	0.0684365	1_Resting
Lgals3	3.04501e-06	-1.36624	0.494	0.654	-0.16	0.0685583	1_Resting
Col6a1	3.1161e-06	0.491613	0.926	0.85	0.076	0.0701591	1_Resting
Htatip2	3.1534e-06	-0.226578	0.074	0.333	-0.259	0.0709988	1_Resting
Satb2	3.17427e-06	-0.51956	0.049	0.286	-0.237	0.0714687	1_Resting
Hadh	3.17682e-06	-0.271605	0.309	0.678	-0.369	0.071526	1_Resting
Ctnnd1	3.19693e-06	-0.294598	0.173	0.475	-0.302	0.0719789	1_Resting
Mrpl54	3.24968e-06	-0.319961	0.58	0.842	-0.262	0.0731665	1_Resting
Stard4	3.25006e-06	-0.295648	0.173	0.477	-0.304	0.0731752	1_Resting
U2af1	3.26205e-06	-0.355937	0.568	0.846	-0.278	0.0734451	1_Resting
Sh3bp4	3.29516e-06	-0.25059	0.049	0.299	-0.25	0.0741905	1_Resting
Aimp1	3.3136e-06	-0.358574	0.556	0.832	-0.276	0.0746057	1_Resting
Sphk1	3.34032e-06	-0.248823	0	0.215	-0.215	0.0752073	1_Resting
Ei24	3.36351e-06	-0.253176	0.123	0.416	-0.293	0.0757294	1_Resting
Ror2	3.39961e-06	0.357884	0.395	0.239	0.156	0.0765421	1_Resting
Dhx40	3.46869e-06	-0.257782	0.111	0.397	-0.286	0.0780976	1_Resting
Rnpep	3.48682e-06	-0.221544	0.074	0.337	-0.263	0.0785058	1_Resting
Cdc42bpb	3.4983e-06	-0.208703	0.086	0.361	-0.275	0.0787642	1_Resting
Eif4h	3.5511e-06	-0.303188	0.605	0.883	-0.278	0.0799531	1_Resting
Olfml2b	3.55382e-06	-1.42828	0.123	0.364	-0.241	0.0800142	1_Resting
Snw1	3.56651e-06	-0.265278	0.259	0.601	-0.342	0.0802999	1_Resting
Blmh	3.5797e-06	-0.267625	0.309	0.657	-0.348	0.0805969	1_Resting
B3gnt9	3.6215e-06	0.385588	0.568	0.447	0.121	0.0815381	1_Resting
Enc1	3.67996e-06	-0.298887	0.049	0.288	-0.239	0.0828543	1_Resting
Cox7a2l	3.6877e-06	-0.379989	0.753	0.94	-0.187	0.0830286	1_Resting
Me2	3.7214e-06	-0.23641	0.062	0.312	-0.25	0.0837874	1_Resting
Rplp0	3.73387e-06	-0.24225	1	0.998	0.002	0.084068	1_Resting
Lxn	3.79693e-06	-0.37768	0.235	0.537	-0.302	0.0854878	1_Resting
Arhgdia	3.80697e-06	-0.325965	0.654	0.878	-0.224	0.085714	1_Resting
Kars	3.83021e-06	-0.284026	0.272	0.606	-0.334	0.0862371	1_Resting
Atp13a3	3.93281e-06	-0.331805	0.136	0.417	-0.281	0.0885473	1_Resting
Dazap1	3.95367e-06	-0.331586	0.346	0.706	-0.36	0.0890169	1_Resting
Rpl11	3.97843e-06	-0.271547	1	1	0	0.0895744	1_Resting
Atg3	4.09573e-06	-0.32063	0.333	0.638	-0.305	0.0922153	1_Resting
Pik3r1	4.11173e-06	-0.430918	0.222	0.517	-0.295	0.0925757	1_Resting
Sfpq	4.12547e-06	-0.354307	0.778	0.963	-0.185	0.092885	1_Resting
Rpl3	4.12624e-06	-0.252403	1	1	0	0.0929023	1_Resting
Ppp2r5a	4.15285e-06	-0.263932	0.185	0.509	-0.324	0.0935014	1_Resting
Gmps	4.21222e-06	-0.247127	0.21	0.532	-0.322	0.094838	1_Resting
Plod1	4.26903e-06	0.42019	0.79	0.718	0.072	0.0961171	1_Resting
Psmd2	4.33951e-06	-0.314146	0.457	0.786	-0.329	0.097704	1_Resting
Snf8	4.36572e-06	-0.276626	0.321	0.651	-0.33	0.0982941	1_Resting
Col13a1	4.3946e-06	-0.492804	0	0.211	-0.211	0.0989445	1_Resting
Kpna4	4.4254e-06	-0.23323	0.16	0.462	-0.302	0.099638	1_Resting
Arf1	4.56043e-06	-0.333358	0.827	0.959	-0.132	0.102678	1_Resting
Zfp260	4.56817e-06	0.524363	0.506	0.381	0.125	0.102852	1_Resting
Lcp1	4.59823e-06	-0.235028	0.062	0.304	-0.242	0.103529	1_Resting
mt-Nd2	4.60054e-06	-0.316077	1	1	0	0.103581	1_Resting
Copb1	4.61554e-06	-0.320946	0.63	0.865	-0.235	0.103919	1_Resting
Gan	4.62847e-06	-0.216372	0.049	0.296	-0.247	0.10421	1_Resting
Klf6	4.6576e-06	-0.64806	0.358	0.643	-0.285	0.104866	1_Resting
Ola1	4.66605e-06	-0.282903	0.321	0.677	-0.356	0.105056	1_Resting
Tomm40	4.71795e-06	-0.298296	0.321	0.668	-0.347	0.106225	1_Resting
Fam129a	4.77968e-06	-0.295985	0	0.209	-0.209	0.107615	1_Resting
Atp5h	4.84057e-06	-0.259432	0.926	0.983	-0.057	0.108985	1_Resting
Kctd10	4.87442e-06	-0.24248	0.148	0.45	-0.302	0.109748	1_Resting
Ndufb4	4.91959e-06	-0.27767	0.617	0.864	-0.247	0.110765	1_Resting
Mrc2	4.97493e-06	0.372011	0.79	0.687	0.103	0.11201	1_Resting
Hdgfl2	5.02283e-06	-0.208834	0.074	0.337	-0.263	0.113089	1_Resting
Slc25a3	5.15093e-06	-0.342197	0.901	0.983	-0.082	0.115973	1_Resting
Tspo	5.20856e-06	-0.393506	0.198	0.487	-0.289	0.117271	1_Resting
Tnfaip6	5.23768e-06	-0.450578	0.037	0.265	-0.228	0.117926	1_Resting
Slc20a2	5.27869e-06	-0.579278	0.111	0.361	-0.25	0.11885	1_Resting
AY036118	5.30516e-06	0.523865	0.79	0.773	0.017	0.119446	1_Resting
Ppfibp2	5.30741e-06	-0.347396	0	0.208	-0.208	0.119496	1_Resting
Lrrfip1	5.39979e-06	-0.327783	0.198	0.482	-0.284	0.121576	1_Resting
Cgref1	5.432e-06	-0.702221	0.222	0.492	-0.27	0.122301	1_Resting
Btbd7	5.49936e-06	-0.258005	0.21	0.543	-0.333	0.123818	1_Resting
Mcrs1	5.50374e-06	-0.252189	0.21	0.529	-0.319	0.123917	1_Resting
9530059O14Rik	5.65081e-06	-0.226597	0	0.207	-0.207	0.127228	1_Resting
Me1	5.67041e-06	-0.464073	0.383	0.624	-0.241	0.127669	1_Resting
Prelid3b	5.68065e-06	-0.252868	0.247	0.569	-0.322	0.1279	1_Resting
Cdv3	5.69852e-06	-0.396613	0.679	0.888	-0.209	0.128302	1_Resting
Usp14	5.71566e-06	-0.236215	0.198	0.528	-0.33	0.128688	1_Resting
Nop58	5.75535e-06	-0.367894	0.531	0.817	-0.286	0.129582	1_Resting
Dlgap4	5.79875e-06	-0.211194	0.111	0.39	-0.279	0.130559	1_Resting
Plxna2	5.82335e-06	-0.589914	0.037	0.258	-0.221	0.131113	1_Resting
Ddx17	5.90857e-06	0.437892	0.79	0.734	0.056	0.133031	1_Resting
Glrx5	5.93663e-06	-0.341259	0.358	0.699	-0.341	0.133663	1_Resting
Sft2d1	6.15694e-06	-0.221054	0.049	0.292	-0.243	0.138624	1_Resting
Efnb1	6.23497e-06	-0.432238	0.235	0.529	-0.294	0.14038	1_Resting
3632451O06Rik	6.26345e-06	0.422182	0.605	0.488	0.117	0.141022	1_Resting
Cast	6.30255e-06	-0.293273	0.235	0.553	-0.318	0.141902	1_Resting
Cdk2ap1	6.46412e-06	0.369747	0.914	0.876	0.038	0.14554	1_Resting
Mef2c	6.46716e-06	-0.476983	0.481	0.741	-0.26	0.145608	1_Resting
Mthfd1l	6.50628e-06	-0.210284	0.123	0.409	-0.286	0.146489	1_Resting
Rasl11a	6.58509e-06	-0.626497	0.049	0.278	-0.229	0.148263	1_Resting
Ccdc58	6.59334e-06	-0.218563	0.16	0.46	-0.3	0.148449	1_Resting
Wnt5a	6.59806e-06	-0.249353	0.025	0.239	-0.214	0.148555	1_Resting
Nars	6.63812e-06	-0.343145	0.395	0.741	-0.346	0.149457	1_Resting
Pde8a	6.65764e-06	-0.200372	0.111	0.393	-0.282	0.149897	1_Resting
Foxa3	6.65901e-06	-0.296635	0.111	0.372	-0.261	0.149928	1_Resting
Podnl1	6.80518e-06	-0.508281	0.012	0.221	-0.209	0.153219	1_Resting
Ogfr	6.82771e-06	-0.24458	0.284	0.626	-0.342	0.153726	1_Resting
Ptbp3	6.93002e-06	-0.262106	0.321	0.679	-0.358	0.156029	1_Resting
Spred1	6.97706e-06	0.384678	0.667	0.588	0.079	0.157088	1_Resting
Ndufa8	7.0365e-06	-0.332568	0.667	0.865	-0.198	0.158427	1_Resting
Itgb1	7.15331e-06	-0.412881	0.79	0.955	-0.165	0.161057	1_Resting
Eif1a	7.17438e-06	-0.389113	0.568	0.807	-0.239	0.161531	1_Resting
Eln	7.25109e-06	0.232889	0.259	0.113	0.146	0.163258	1_Resting
Frmd4a	7.35965e-06	-0.347935	0.123	0.374	-0.251	0.165703	1_Resting
Lin7c	7.41249e-06	-0.254509	0.259	0.613	-0.354	0.166892	1_Resting
Tmem14c	7.47695e-06	-0.347095	0.679	0.898	-0.219	0.168343	1_Resting
Wbp11	7.50292e-06	-0.246393	0.284	0.619	-0.335	0.168928	1_Resting
Dhrs7	7.59219e-06	-0.249785	0.16	0.454	-0.294	0.170938	1_Resting
Dpysl2	7.59921e-06	-0.238101	0.123	0.4	-0.277	0.171096	1_Resting
Mvd	7.62459e-06	-0.234806	0.086	0.341	-0.255	0.171668	1_Resting
2410002F23Rik	7.69263e-06	0.446785	0.593	0.496	0.097	0.1732	1_Resting
Slc36a2	7.88048e-06	-0.453748	0	0.201	-0.201	0.177429	1_Resting
Gtpbp4	7.89544e-06	-0.352178	0.37	0.664	-0.294	0.177766	1_Resting
Pnp	7.92081e-06	-0.382155	0.284	0.589	-0.305	0.178337	1_Resting
Mrps18c	8.00524e-06	-0.231496	0.247	0.581	-0.334	0.180238	1_Resting
Bzw1	8.135e-06	-0.265357	0.753	0.923	-0.17	0.18316	1_Resting
Tbx2	8.21328e-06	-0.344751	0	0.201	-0.201	0.184922	1_Resting
Eif3e	8.22886e-06	-0.363165	0.827	0.961	-0.134	0.185273	1_Resting
Bcar1	8.26289e-06	-0.208688	0.148	0.444	-0.296	0.186039	1_Resting
Smarca4	8.32695e-06	-0.30959	0.37	0.68	-0.31	0.187481	1_Resting
Nmt1	8.4014e-06	-0.214305	0.185	0.489	-0.304	0.189157	1_Resting
Acat2	8.41478e-06	-0.224984	0.099	0.362	-0.263	0.189459	1_Resting
Bud31	9.12593e-06	-0.241563	0.296	0.671	-0.375	0.20547	1_Resting
Sh3pxd2a	9.14587e-06	-0.257896	0.296	0.631	-0.335	0.205919	1_Resting
Hnrnpc	9.37332e-06	-0.344705	0.605	0.9	-0.295	0.21104	1_Resting
Mcl1	9.55234e-06	-0.363299	0.654	0.921	-0.267	0.215071	1_Resting
Stmn1	9.59599e-06	-0.81563	0.16	0.403	-0.243	0.216054	1_Resting
Ddx39	9.74771e-06	-0.275077	0.222	0.53	-0.308	0.21947	1_Resting
Dclk1	9.79255e-06	-0.302276	0.049	0.279	-0.23	0.220479	1_Resting
Lrrc59	9.83444e-06	-0.387444	0.716	0.884	-0.168	0.221422	1_Resting
C1qbp	9.89461e-06	-0.364867	0.506	0.804	-0.298	0.222777	1_Resting
Aldh9a1	9.94841e-06	-0.210051	0.062	0.306	-0.244	0.223988	1_Resting
Prkar1a	1.01748e-05	-0.396611	0.593	0.87	-0.277	0.229085	1_Resting
Nenf	1.03378e-05	0.347364	0.901	0.95	-0.049	0.232757	1_Resting
Iscu	1.04197e-05	-0.267936	0.21	0.522	-0.312	0.234599	1_Resting
Nsun2	1.0445e-05	-0.260867	0.296	0.618	-0.322	0.235168	1_Resting
Fam32a	1.0512e-05	-0.250739	0.185	0.473	-0.288	0.236677	1_Resting
Ralgps2	1.05656e-05	-0.235007	0.025	0.238	-0.213	0.237884	1_Resting
Cdon	1.07014e-05	0.46554	0.358	0.213	0.145	0.240942	1_Resting
Eny2	1.10205e-05	-0.323244	0.778	0.954	-0.176	0.248126	1_Resting
Ammecr1	1.11199e-05	-0.271465	0.123	0.379	-0.256	0.250365	1_Resting
Tjp1	1.11235e-05	-0.255733	0.148	0.423	-0.275	0.250447	1_Resting
Anxa11	1.11422e-05	-0.396301	0.346	0.59	-0.244	0.250868	1_Resting
S100a4	1.13149e-05	-0.509586	0.074	0.307	-0.233	0.254756	1_Resting
Ckb	1.19617e-05	-0.827523	0.333	0.581	-0.248	0.269319	1_Resting
Acot9	1.19765e-05	-0.211573	0.062	0.298	-0.236	0.269651	1_Resting
Nid2	1.20983e-05	0.490068	0.852	0.664	0.188	0.272394	1_Resting
Rgs2	1.22012e-05	-0.405733	0.037	0.249	-0.212	0.274711	1_Resting
Arih2	1.23087e-05	-0.251571	0.198	0.495	-0.297	0.277131	1_Resting
Ephb2	1.23091e-05	-0.22281	0.099	0.354	-0.255	0.27714	1_Resting
Tln2	1.23302e-05	-0.438277	0.136	0.39	-0.254	0.277615	1_Resting
Fkbp8	1.25091e-05	-0.30669	0.469	0.798	-0.329	0.281642	1_Resting
Psmd8	1.26262e-05	-0.416454	0.556	0.86	-0.304	0.284279	1_Resting
Zcchc14	1.26648e-05	-0.365608	0.235	0.519	-0.284	0.285148	1_Resting
Ptpn13	1.27799e-05	-0.308761	0.037	0.252	-0.215	0.287739	1_Resting
Rpl22l1	1.27967e-05	-0.315766	0.975	0.996	-0.021	0.288118	1_Resting
Ddrgk1	1.28353e-05	-0.244019	0.395	0.739	-0.344	0.288986	1_Resting
Tnni2	1.28895e-05	2.63047	0.309	0.164	0.145	0.290207	1_Resting
Baz1a	1.2965e-05	-0.275607	0.074	0.314	-0.24	0.291907	1_Resting
Heg1	1.3076e-05	-0.239137	0.012	0.215	-0.203	0.294406	1_Resting
Tnfrsf1a	1.30872e-05	-0.249727	0.222	0.547	-0.325	0.294658	1_Resting
Impad1	1.33165e-05	-0.328726	0.556	0.811	-0.255	0.299822	1_Resting
Psma3	1.34033e-05	-0.334143	0.852	0.957	-0.105	0.301775	1_Resting
Rpl26	1.34929e-05	-0.318063	0.988	0.999	-0.011	0.303794	1_Resting
Nedd4	1.35161e-05	-0.281328	1	0.995	0.005	0.304315	1_Resting
Creb3l2	1.35495e-05	0.371512	0.815	0.753	0.062	0.305067	1_Resting
Clmp	1.35877e-05	-0.378805	0.198	0.484	-0.286	0.305928	1_Resting
Mllt3	1.38533e-05	0.351687	0.321	0.171	0.15	0.311908	1_Resting
Tmem2	1.40755e-05	-0.294122	0.123	0.387	-0.264	0.316909	1_Resting
Cnn2	1.40827e-05	-0.829287	0.296	0.523	-0.227	0.317073	1_Resting
Arid5a	1.44465e-05	-0.201904	0.136	0.405	-0.269	0.325262	1_Resting
Atrx	1.44973e-05	0.354887	0.864	0.83	0.034	0.326407	1_Resting
Sorbs1	1.4605e-05	0.47296	0.58	0.458	0.122	0.328832	1_Resting
Zim1	1.4611e-05	0.56991	0.395	0.257	0.138	0.328967	1_Resting
Fat1	1.47232e-05	-0.477429	0.469	0.761	-0.292	0.331492	1_Resting
Slc6a6	1.47423e-05	0.368787	0.63	0.504	0.126	0.331924	1_Resting
Rnaseh2c	1.49333e-05	-0.361482	0.284	0.578	-0.294	0.336223	1_Resting
Eif3m	1.50159e-05	-0.307215	0.679	0.898	-0.219	0.338084	1_Resting
Carnmt1	1.51909e-05	-0.210859	0.185	0.491	-0.306	0.342023	1_Resting
Cxcl1	1.54626e-05	-0.983439	0.099	0.325	-0.226	0.34814	1_Resting
Grb14	1.61223e-05	-0.30577	0.111	0.352	-0.241	0.362994	1_Resting
Akirin2	1.6363e-05	-0.210717	0.185	0.493	-0.308	0.368414	1_Resting
Pxdc1	1.68282e-05	-0.335403	0.309	0.622	-0.313	0.378886	1_Resting
Gm10036	1.68693e-05	-0.385306	0.123	0.377	-0.254	0.379813	1_Resting
Vdac3	1.72462e-05	-0.336497	0.654	0.874	-0.22	0.388299	1_Resting
Rpl6	1.73784e-05	-0.208664	1	0.999	0.001	0.391275	1_Resting
Erh	1.73851e-05	-0.257152	0.383	0.735	-0.352	0.391426	1_Resting
Minos1	1.75206e-05	-0.306359	0.84	0.953	-0.113	0.394477	1_Resting
Chmp5	1.78112e-05	-0.227393	0.259	0.576	-0.317	0.40102	1_Resting
Llph	1.79233e-05	-0.276018	0.346	0.681	-0.335	0.403543	1_Resting
Adgra3	1.79275e-05	0.517214	0.642	0.569	0.073	0.403637	1_Resting
Tle1	1.79809e-05	-0.202695	0.086	0.331	-0.245	0.40484	1_Resting
H2afj	1.82566e-05	-0.37475	0.58	0.837	-0.257	0.411046	1_Resting
Hoxa5	1.82662e-05	0.250333	0.296	0.147	0.149	0.411263	1_Resting
Fstl1	1.83424e-05	-0.264177	0.827	0.683	0.144	0.412979	1_Resting
Dcun1d5	1.85637e-05	-0.286699	0.519	0.838	-0.319	0.417962	1_Resting
Fam213b	1.85731e-05	-0.210347	0.148	0.423	-0.275	0.418174	1_Resting
Hnrnpk	1.87697e-05	-0.27095	0.951	0.99	-0.039	0.422599	1_Resting
AC160336.1	1.87785e-05	-0.394844	0.086	0.311	-0.225	0.422797	1_Resting
Hbegf	1.90263e-05	-0.59317	0.198	0.468	-0.27	0.428376	1_Resting
Fech	1.90551e-05	-0.202346	0.111	0.368	-0.257	0.429027	1_Resting
Brd2	1.94704e-05	-0.315239	0.667	0.919	-0.252	0.438376	1_Resting
Golt1b	1.97824e-05	-0.299246	0.383	0.709	-0.326	0.445401	1_Resting
Alyref	2.01723e-05	-0.299282	0.444	0.734	-0.29	0.45418	1_Resting
Acaa2	2.02054e-05	-0.42205	0.185	0.451	-0.266	0.454925	1_Resting
Ilk	2.02073e-05	-0.27925	0.37	0.749	-0.379	0.454967	1_Resting
Med13l	2.03096e-05	-0.308366	0.346	0.688	-0.342	0.457271	1_Resting
1810022K09Rik	2.0589e-05	-0.284187	0.358	0.666	-0.308	0.463562	1_Resting
Vdr	2.06023e-05	-0.382614	0.259	0.532	-0.273	0.463862	1_Resting
Pon2	2.08302e-05	-0.223438	0.062	0.288	-0.226	0.468993	1_Resting
Immt	2.0875e-05	-0.242814	0.259	0.59	-0.331	0.470001	1_Resting
Rnase4	2.09737e-05	-0.287145	0.049	0.264	-0.215	0.472223	1_Resting
Rc3h1	2.10698e-05	-0.238404	0.185	0.477	-0.292	0.474387	1_Resting
Smap1	2.11229e-05	-0.291896	0.395	0.714	-0.319	0.475582	1_Resting
Ppp2r2d	2.1554e-05	-0.250171	0.222	0.51	-0.288	0.485288	1_Resting
Bnip3	2.17441e-05	-0.824893	0.469	0.625	-0.156	0.489569	1_Resting
Gab1	2.20034e-05	-0.22883	0.198	0.487	-0.289	0.495405	1_Resting
Eef1e1	2.24602e-05	-0.241783	0.222	0.51	-0.288	0.505691	1_Resting
Atp5j2	2.25977e-05	-0.29884	0.889	0.962	-0.073	0.508787	1_Resting
Pgam1	2.26471e-05	-0.624457	0.815	0.905	-0.09	0.5099	1_Resting
Timp2	2.2663e-05	0.330614	0.938	0.892	0.046	0.510257	1_Resting
Pla2g12a	2.26712e-05	-0.230383	0.148	0.423	-0.275	0.510443	1_Resting
Col22a1	2.27752e-05	-0.818389	0.012	0.202	-0.19	0.512784	1_Resting
Ndufab1	2.29019e-05	-0.309256	0.753	0.886	-0.133	0.515636	1_Resting
Psmd6	2.29747e-05	-0.323396	0.506	0.776	-0.27	0.517275	1_Resting
Sema6d	2.3484e-05	-0.306354	0.025	0.224	-0.199	0.528742	1_Resting
Fads1	2.36344e-05	-0.247639	0.321	0.639	-0.318	0.532127	1_Resting
Ephb4	2.3666e-05	0.332963	0.309	0.165	0.144	0.53284	1_Resting
2900097C17Rik	2.36691e-05	0.332773	0.84	0.848	-0.008	0.53291	1_Resting
Flnb	2.38165e-05	0.427292	0.63	0.553	0.077	0.536229	1_Resting
Ssbp3	2.38329e-05	0.401223	0.531	0.42	0.111	0.536598	1_Resting
Mrpl13	2.41135e-05	-0.246877	0.296	0.611	-0.315	0.542916	1_Resting
Mrpl23	2.4136e-05	-0.318678	0.543	0.837	-0.294	0.543422	1_Resting
Magt1	2.41843e-05	-0.307923	0.407	0.736	-0.329	0.54451	1_Resting
Gna13	2.42566e-05	-0.250366	0.259	0.577	-0.318	0.546137	1_Resting
Tceal9	2.43579e-05	0.335577	0.951	0.944	0.007	0.548417	1_Resting
Bok	2.4576e-05	-0.3206	0.025	0.223	-0.198	0.553328	1_Resting
Slc38a10	2.46069e-05	-0.359151	0.519	0.795	-0.276	0.554023	1_Resting
Coro1c	2.49469e-05	-0.23692	0.123	0.375	-0.252	0.56168	1_Resting
Wsb2	2.49623e-05	-0.220337	0.296	0.633	-0.337	0.562026	1_Resting
Hsd17b12	2.49801e-05	-0.270674	0.321	0.629	-0.308	0.562426	1_Resting
Klf10	2.54122e-05	-0.329438	0.296	0.603	-0.307	0.572156	1_Resting
Iqgap1	2.54856e-05	-0.336452	0.593	0.854	-0.261	0.573808	1_Resting
Ptprg	2.55993e-05	-0.219823	0.012	0.206	-0.194	0.576369	1_Resting
Calm1	2.56464e-05	-0.358033	0.889	0.981	-0.092	0.577429	1_Resting
Qk	2.56644e-05	-0.285982	0.691	0.912	-0.221	0.577835	1_Resting
Esd	2.57435e-05	-0.349374	0.63	0.883	-0.253	0.579615	1_Resting
Ssu72	2.59707e-05	-0.303466	0.383	0.703	-0.32	0.584731	1_Resting
Cib1	2.75394e-05	-0.22871	0.198	0.481	-0.283	0.620049	1_Resting
Elavl1	2.76535e-05	-0.298582	0.395	0.733	-0.338	0.622618	1_Resting
Ruvbl1	2.76823e-05	-0.209622	0.21	0.517	-0.307	0.623268	1_Resting
2610528A11Rik	2.77479e-05	-0.467812	0.037	0.238	-0.201	0.624743	1_Resting
Ubr5	2.78193e-05	-0.250734	0.321	0.661	-0.34	0.626352	1_Resting
Nav1	2.8037e-05	-0.319684	0.136	0.385	-0.249	0.631253	1_Resting
2011-09-01	2.83202e-05	-0.500156	0.407	0.716	-0.309	0.637629	1_Resting
Usp29	2.97139e-05	0.265675	0.284	0.146	0.138	0.669009	1_Resting
Cggbp1	3.00635e-05	-0.26853	0.395	0.699	-0.304	0.676881	1_Resting
Dennd5b	3.02126e-05	-0.275011	0.025	0.219	-0.194	0.680236	1_Resting
Tspan4	3.02973e-05	-0.374216	0.58	0.87	-0.29	0.682143	1_Resting
Tmsb4x	3.03068e-05	-2.55007	0.58	0.768	-0.188	0.682357	1_Resting
Tprgl	3.06295e-05	-0.234083	0.272	0.58	-0.308	0.689624	1_Resting
Cops5	3.0701e-05	-0.238665	0.333	0.647	-0.314	0.691234	1_Resting
Hspa4	3.07301e-05	-0.252095	0.37	0.702	-0.332	0.691889	1_Resting
Lsm4	3.12972e-05	-0.319687	0.531	0.811	-0.28	0.704656	1_Resting
Bzw2	3.1319e-05	-0.302418	0.358	0.65	-0.292	0.705147	1_Resting
Aga	3.13654e-05	0.447701	0.63	0.581	0.049	0.706191	1_Resting
Hspa14	3.1511e-05	-0.231654	0.148	0.396	-0.248	0.70947	1_Resting
Taf15	3.17032e-05	-0.228593	0.16	0.423	-0.263	0.713798	1_Resting
Gnai3	3.17924e-05	-0.291007	0.37	0.677	-0.307	0.715806	1_Resting
Pla2g4a	3.26298e-05	-0.270713	0.037	0.237	-0.2	0.734659	1_Resting
Ppic	3.26858e-05	-0.402762	0.914	0.972	-0.058	0.735922	1_Resting
Vasn	3.33197e-05	-0.417095	0.519	0.801	-0.282	0.750192	1_Resting
Crtap	3.36062e-05	0.368797	0.852	0.845	0.007	0.756643	1_Resting
Carhsp1	3.42672e-05	-0.218729	0.136	0.387	-0.251	0.771527	1_Resting
Ap3s1	3.46852e-05	-0.311748	0.383	0.698	-0.315	0.780938	1_Resting
Pcolce	3.51587e-05	-0.508772	0.79	0.915	-0.125	0.791599	1_Resting
Htra1	3.52134e-05	0.550858	0.704	0.593	0.111	0.792831	1_Resting
Mrpl12	3.57794e-05	-0.286678	0.358	0.691	-0.333	0.805572	1_Resting
Trp53inp2	3.62493e-05	-0.202544	0.198	0.494	-0.296	0.816153	1_Resting
Eif2s3x	3.65932e-05	-0.223221	0.284	0.592	-0.308	0.823896	1_Resting
Hip1	3.71485e-05	-0.263766	0.111	0.355	-0.244	0.836398	1_Resting
Tm2d1	3.72783e-05	-0.235799	0.333	0.665	-0.332	0.839322	1_Resting
Meltf	3.74694e-05	0.503863	0.716	0.583	0.133	0.843623	1_Resting
Retreg1	3.76492e-05	-0.279339	0.099	0.332	-0.233	0.847672	1_Resting
Trappc5	3.841e-05	-0.21894	0.198	0.477	-0.279	0.864801	1_Resting
Srf	3.84746e-05	-0.218355	0.148	0.41	-0.262	0.866256	1_Resting
Insig2	3.87947e-05	-0.356983	0.185	0.445	-0.26	0.873463	1_Resting
Utrn	3.89188e-05	-0.254266	0.321	0.654	-0.333	0.876257	1_Resting
Timp3	4.07506e-05	-0.665913	0.333	0.582	-0.249	0.9175	1_Resting
Tet1	4.10428e-05	0.277383	0.272	0.134	0.138	0.924079	1_Resting
Ufm1	4.16642e-05	-0.314241	0.531	0.788	-0.257	0.93807	1_Resting
Gclc	4.16664e-05	-0.211863	0.062	0.266	-0.204	0.938118	1_Resting
Psmb1	4.19157e-05	-0.28675	0.864	0.964	-0.1	0.943733	1_Resting
Ube2j2	4.19254e-05	-0.252301	0.321	0.636	-0.315	0.943951	1_Resting
Bambi	4.24957e-05	-0.357718	0.21	0.478	-0.268	0.956792	1_Resting
Ormdl3	4.26087e-05	0.417652	0.642	0.605	0.037	0.959334	1_Resting
mt-Atp6	4.30049e-05	0.250966	1	1	0	0.968256	1_Resting
Phb2	4.31907e-05	-0.264366	0.556	0.855	-0.299	0.97244	1_Resting
Naa10	4.32292e-05	-0.210863	0.272	0.59	-0.318	0.973305	1_Resting
Fbl	4.36693e-05	-0.295318	0.494	0.774	-0.28	0.983213	1_Resting
Tmem88	4.37289e-05	-0.237705	0.062	0.274	-0.212	0.984556	1_Resting
Cox7b	4.38908e-05	-0.32921	0.79	0.933	-0.143	0.988202	1_Resting
Stt3b	4.39054e-05	-0.311256	0.481	0.776	-0.295	0.98853	1_Resting
Polr2a	4.40872e-05	-0.213055	0.309	0.64	-0.331	0.992624	1_Resting
Zfp36	4.42788e-05	-0.260502	0.444	0.737	-0.293	0.996936	1_Resting
Ssr3	4.45183e-05	-0.268657	0.975	0.969	0.006	1	1_Resting
Yipf2	4.51756e-05	0.281277	0.222	0.099	0.123	1	1_Resting
Nav3	4.54581e-05	-0.411479	0.025	0.213	-0.188	1	1_Resting
Ogn	4.57148e-05	0.383465	0.506	0.328	0.178	1	1_Resting
Cdk13	4.58291e-05	-0.229672	0.198	0.471	-0.273	1	1_Resting
Aebp1	4.59628e-05	0.663479	0.741	0.733	0.008	1	1_Resting
Akap13	4.6019e-05	-0.259823	0.284	0.599	-0.315	1	1_Resting
Rrm2b	4.63136e-05	-0.209077	0.074	0.297	-0.223	1	1_Resting
Rnh1	4.66111e-05	-0.335672	0.494	0.778	-0.284	1	1_Resting
Pdrg1	4.71989e-05	0.371896	0.815	0.719	0.096	1	1_Resting
Serpinb6a	4.72903e-05	-0.288847	0.395	0.742	-0.347	1	1_Resting
Spcs3	4.76299e-05	-0.251951	0.284	0.601	-0.317	1	1_Resting
Ube2c	4.76962e-05	-0.491603	0.025	0.213	-0.188	1	1_Resting
Nphp1	4.78552e-05	0.431258	0.457	0.339	0.118	1	1_Resting
Nans	4.7938e-05	-0.238632	0.333	0.652	-0.319	1	1_Resting
Nrk	4.80046e-05	0.368425	0.877	0.668	0.209	1	1_Resting
Arfip2	4.85866e-05	0.431989	0.506	0.416	0.09	1	1_Resting
Fem1b	4.86244e-05	-0.227227	0.148	0.407	-0.259	1	1_Resting
Polr1d	4.87669e-05	-0.263245	0.617	0.89	-0.273	1	1_Resting
Cdk16	4.90748e-05	-0.207422	0.222	0.523	-0.301	1	1_Resting
Eif1ax	5.11841e-05	-0.296254	0.63	0.872	-0.242	1	1_Resting
Phf5a	5.24053e-05	-0.276043	0.395	0.731	-0.336	1	1_Resting
Rcn1	5.28915e-05	0.353323	0.988	0.94	0.048	1	1_Resting
Nckap1	5.33786e-05	-0.228821	0.284	0.593	-0.309	1	1_Resting
Cyp20a1	5.37126e-05	-0.210191	0.222	0.516	-0.294	1	1_Resting
Rpl36a	5.42438e-05	-0.258933	0.963	0.997	-0.034	1	1_Resting
Arl13b	5.50315e-05	-0.205521	0.123	0.374	-0.251	1	1_Resting
Mirg	5.50631e-05	0.486611	0.346	0.197	0.149	1	1_Resting
Tnpo1	5.54784e-05	-0.26414	0.296	0.602	-0.306	1	1_Resting
Ifitm10	5.62647e-05	0.318549	0.457	0.301	0.156	1	1_Resting
Dbi	5.6784e-05	0.441748	0.975	0.957	0.018	1	1_Resting
Bcar3	5.71308e-05	-0.201614	0.025	0.211	-0.186	1	1_Resting
Zbtb1	5.79647e-05	-0.247325	0.21	0.483	-0.273	1	1_Resting
Csrnp1	5.80242e-05	-0.277161	0.235	0.517	-0.282	1	1_Resting
Mtus1	5.82686e-05	0.41083	0.321	0.189	0.132	1	1_Resting
Gm11808	5.86597e-05	-0.257532	0.593	0.828	-0.235	1	1_Resting
Ndufs8	5.95759e-05	-0.229219	0.346	0.679	-0.333	1	1_Resting
Stip1	5.96309e-05	-0.212391	0.21	0.496	-0.286	1	1_Resting
Tubb2b	5.97729e-05	0.482733	0.37	0.231	0.139	1	1_Resting
Shmt2	5.98937e-05	-0.230754	0.235	0.517	-0.282	1	1_Resting
Ptgs2	6.02427e-05	-0.682248	0.049	0.242	-0.193	1	1_Resting
Aqp1	6.16514e-05	-0.365993	0.049	0.242	-0.193	1	1_Resting
Fip1l1	6.19356e-05	-0.201353	0.235	0.543	-0.308	1	1_Resting
Ncl	6.2425e-05	-0.346056	0.914	0.986	-0.072	1	1_Resting
Adamts9	6.34111e-05	-0.370115	0.173	0.418	-0.245	1	1_Resting
Ppp3ca	6.35831e-05	-0.35001	0.691	0.901	-0.21	1	1_Resting
Mtx1	6.41118e-05	-0.226789	0.333	0.644	-0.311	1	1_Resting
Cbx6	6.51636e-05	0.339631	0.358	0.216	0.142	1	1_Resting
Rac1	6.56238e-05	-0.325581	0.691	0.928	-0.237	1	1_Resting
Wisp1	6.60696e-05	-0.398962	0.247	0.494	-0.247	1	1_Resting
Slpi	6.70349e-05	-0.415595	0.099	0.315	-0.216	1	1_Resting
Rrp1	6.71887e-05	-0.245375	0.432	0.763	-0.331	1	1_Resting
Map2k2	6.73703e-05	-0.287716	0.593	0.848	-0.255	1	1_Resting
Sod2	6.74189e-05	-0.286526	0.531	0.805	-0.274	1	1_Resting
Tnfsf11	6.76726e-05	-0.562001	0.025	0.203	-0.178	1	1_Resting
Crlf3	6.80822e-05	0.608555	0.383	0.258	0.125	1	1_Resting
Gm8797	6.83499e-05	-0.431975	0.296	0.545	-0.249	1	1_Resting
Smad6	6.84965e-05	-0.218494	0.074	0.282	-0.208	1	1_Resting
Slk	6.87495e-05	-0.225379	0.259	0.551	-0.292	1	1_Resting
2700038G22Rik	6.97913e-05	-0.275994	0.062	0.265	-0.203	1	1_Resting
Car3	7.00898e-05	-1.08137	0.025	0.201	-0.176	1	1_Resting
Epas1	7.12626e-05	-0.423059	0.062	0.263	-0.201	1	1_Resting
Pbx1	7.13081e-05	0.372855	0.543	0.393	0.15	1	1_Resting
Rasgrp2	7.17851e-05	-0.43192	0.049	0.24	-0.191	1	1_Resting
Ndn	7.21568e-05	0.34519	0.753	0.672	0.081	1	1_Resting
Samm50	7.27448e-05	-0.224253	0.333	0.671	-0.338	1	1_Resting
Bst2	7.4287e-05	-0.229265	0.086	0.303	-0.217	1	1_Resting
Ergic2	7.44556e-05	-0.2485	0.42	0.736	-0.316	1	1_Resting
Ptpn12	7.50848e-05	-0.212042	0.111	0.345	-0.234	1	1_Resting
Smc1a	7.55855e-05	-0.28073	0.333	0.651	-0.318	1	1_Resting
Psmg4	7.62436e-05	-0.218228	0.321	0.634	-0.313	1	1_Resting
Cotl1	7.63727e-05	-0.275296	0.148	0.392	-0.244	1	1_Resting
Tex261	7.66124e-05	-0.242751	0.383	0.698	-0.315	1	1_Resting
Kif5b	7.68597e-05	-0.259648	0.444	0.775	-0.331	1	1_Resting
Gpx8	7.71776e-05	0.362806	0.901	0.893	0.008	1	1_Resting
Fbln5	7.78883e-05	-0.425952	0.037	0.224	-0.187	1	1_Resting
Ppp2r2a	7.89887e-05	-0.218428	0.321	0.627	-0.306	1	1_Resting
Ddah2	8.03869e-05	-0.359348	0.062	0.257	-0.195	1	1_Resting
Fth1	8.09089e-05	-0.524118	1	0.996	0.004	1	1_Resting
Gigyf1	8.09751e-05	0.336739	0.407	0.274	0.133	1	1_Resting
Slc40a1	8.15845e-05	0.635986	0.247	0.116	0.131	1	1_Resting
Tead1	8.21354e-05	-0.307451	0.346	0.639	-0.293	1	1_Resting
Dyrk1a	8.27281e-05	-0.206596	0.284	0.569	-0.285	1	1_Resting
Myo5a	8.28139e-05	-0.229609	0.185	0.451	-0.266	1	1_Resting
Basp1	8.31372e-05	-0.536812	0.148	0.367	-0.219	1	1_Resting
Plscr1	8.34266e-05	-0.311005	0.136	0.363	-0.227	1	1_Resting
Edf1	8.37298e-05	-0.30789	0.704	0.875	-0.171	1	1_Resting
Rapgef6	8.43824e-05	-0.230151	0.272	0.576	-0.304	1	1_Resting
Tyms	8.46731e-05	-0.314272	0.062	0.26	-0.198	1	1_Resting
Pdhb	8.53929e-05	-0.226183	0.247	0.533	-0.286	1	1_Resting
Snrpb	8.55266e-05	-0.274918	0.802	0.942	-0.14	1	1_Resting
Hp	8.61523e-05	-0.996059	0.037	0.216	-0.179	1	1_Resting
Cspg4	8.67002e-05	0.477871	0.951	0.77	0.181	1	1_Resting
Nfib	8.71572e-05	0.396422	0.556	0.389	0.167	1	1_Resting
Pros1	8.78153e-05	-0.403052	0.21	0.454	-0.244	1	1_Resting
Mcrip1	8.8926e-05	0.455782	0.827	0.849	-0.022	1	1_Resting
Smurf2	9.16929e-05	-0.21342	0.21	0.481	-0.271	1	1_Resting
Map4	9.29467e-05	-0.200524	0.247	0.533	-0.286	1	1_Resting
Nfe2l2	9.46204e-05	-0.21932	0.16	0.412	-0.252	1	1_Resting
Uqcr11	9.50177e-05	-0.281649	0.864	0.932	-0.068	1	1_Resting
Hivep2	9.60996e-05	-0.214766	0.185	0.453	-0.268	1	1_Resting
Snrpe	9.6574e-05	-0.301961	0.852	0.953	-0.101	1	1_Resting
Hebp1	9.76723e-05	-0.231927	0.148	0.382	-0.234	1	1_Resting
Zfp618	9.79598e-05	-0.217438	0.037	0.224	-0.187	1	1_Resting
Tmbim6	9.84483e-05	-0.346068	0.63	0.896	-0.266	1	1_Resting
Rangap1	0.000101194	-0.232502	0.123	0.35	-0.227	1	1_Resting
mt-Nd4l	0.000102209	0.243734	0.889	0.94	-0.051	1	1_Resting
Rps14	0.000102932	-0.249822	1	1	0	1	1_Resting
Zcchc24	0.000103563	-0.245993	0.086	0.301	-0.215	1	1_Resting
Mmp23	0.000103597	-0.41196	0.148	0.359	-0.211	1	1_Resting
Trio	0.00010456	-0.206407	0.16	0.409	-0.249	1	1_Resting
Maff	0.000104755	-0.314184	0.284	0.556	-0.272	1	1_Resting
Atp5e	0.000105318	-0.260434	0.963	0.986	-0.023	1	1_Resting
Smarca5	0.000105569	-0.306598	0.593	0.82	-0.227	1	1_Resting
Rnmt	0.000106105	-0.206964	0.21	0.484	-0.274	1	1_Resting
Cnih4	0.0001076	-0.226271	0.333	0.623	-0.29	1	1_Resting
Actn1	0.000107717	-0.252468	0.296	0.612	-0.316	1	1_Resting
Fbln7	0.000108529	0.4136	0.691	0.545	0.146	1	1_Resting
Anp32e	0.000109283	-0.28839	0.407	0.702	-0.295	1	1_Resting
4930523C07Rik	0.000111092	-0.28436	0.309	0.561	-0.252	1	1_Resting
Serpinf1	0.000111387	-1.71079	0.259	0.467	-0.208	1	1_Resting
Maged2	0.000115599	0.329554	0.951	0.929	0.022	1	1_Resting
Rhoa	0.00011628	-0.241652	0.889	0.974	-0.085	1	1_Resting
Pgm3	0.000116313	-0.264992	0.346	0.639	-0.293	1	1_Resting
Angpt1	0.000118012	0.659124	0.309	0.172	0.137	1	1_Resting
Kcnq1ot1	0.000119435	0.418545	0.901	0.84	0.061	1	1_Resting
Ttyh2	0.00011968	-0.216476	0.062	0.26	-0.198	1	1_Resting
Psmb5	0.000119981	-0.286137	0.728	0.904	-0.176	1	1_Resting
Ccdc8	0.000122759	0.347728	0.309	0.18	0.129	1	1_Resting
Tgm2	0.000123628	-0.221368	0.086	0.299	-0.213	1	1_Resting
Ppp1ca	0.000123689	-0.321063	0.815	0.936	-0.121	1	1_Resting
Mapk1	0.000124023	-0.207853	0.284	0.603	-0.319	1	1_Resting
Akr1b3	0.000124621	-0.282175	0.296	0.583	-0.287	1	1_Resting
Efhd2	0.000124643	-0.228591	0.259	0.55	-0.291	1	1_Resting
Ift43	0.000126232	-0.215989	0.296	0.576	-0.28	1	1_Resting
Ndufv1	0.000127056	-0.263581	0.321	0.618	-0.297	1	1_Resting
Dnajb11	0.000127182	-0.258432	0.432	0.743	-0.311	1	1_Resting
Pgls	0.000128129	-0.279515	0.741	0.924	-0.183	1	1_Resting
Mrto4	0.000128353	-0.236175	0.346	0.638	-0.292	1	1_Resting
Snx3	0.00012937	-0.286576	0.704	0.886	-0.182	1	1_Resting
Wisp3	0.000131569	0.331738	0.37	0.242	0.128	1	1_Resting
Phf20l1	0.000132404	-0.214516	0.247	0.543	-0.296	1	1_Resting
Fam89a	0.000133711	-0.353064	0.247	0.468	-0.221	1	1_Resting
Ypel3	0.000135017	0.430139	0.654	0.579	0.075	1	1_Resting
Rps6kb1	0.000137322	-0.265949	0.37	0.668	-0.298	1	1_Resting
Colec12	0.000140323	0.31905	0.901	0.882	0.019	1	1_Resting
Jag1	0.000141621	-0.22285	0.049	0.232	-0.183	1	1_Resting
Rab5a	0.000142499	-0.262738	0.432	0.722	-0.29	1	1_Resting
Dnaja2	0.000143271	-0.230386	0.469	0.76	-0.291	1	1_Resting
Cyb5b	0.000145705	-0.244902	0.321	0.593	-0.272	1	1_Resting
1110008F13Rik	0.00014908	-0.307643	0.531	0.789	-0.258	1	1_Resting
Mydgf	0.000149135	-0.275576	0.778	0.914	-0.136	1	1_Resting
Sdhd	0.000149967	-0.247812	0.481	0.784	-0.303	1	1_Resting
Mrps21	0.000150604	-0.217367	0.506	0.803	-0.297	1	1_Resting
Cct7	0.000152583	-0.28253	0.716	0.896	-0.18	1	1_Resting
Ncmap	0.000154443	0.338709	0.79	0.567	0.223	1	1_Resting
Sumo1	0.000156086	-0.284566	0.654	0.893	-0.239	1	1_Resting
Ctsf	0.000156368	0.321054	0.519	0.397	0.122	1	1_Resting
Pls3	0.000156796	-0.27644	0.235	0.479	-0.244	1	1_Resting
Atp8b2	0.000157136	0.424145	0.556	0.504	0.052	1	1_Resting
2610035D17Rik	0.000157199	0.232864	0.21	0.098	0.112	1	1_Resting
Dhx36	0.000157736	-0.201938	0.309	0.632	-0.323	1	1_Resting
Pomp	0.000158228	-0.227454	0.716	0.917	-0.201	1	1_Resting
Lims1	0.000158726	-0.291755	0.296	0.558	-0.262	1	1_Resting
Scn1b	0.0001606	-0.233894	0.259	0.514	-0.255	1	1_Resting
Pak1	0.000161561	-0.251381	0.136	0.361	-0.225	1	1_Resting
Gadd45a	0.000161739	-0.261745	0.21	0.46	-0.25	1	1_Resting
Idh2	0.000162499	-0.305734	0.506	0.802	-0.296	1	1_Resting
Rsl1d1	0.000163725	-0.243135	0.519	0.782	-0.263	1	1_Resting
Unc5c	0.000168122	0.420929	0.679	0.628	0.051	1	1_Resting
Gde1	0.000168151	-0.271238	0.432	0.704	-0.272	1	1_Resting
Ywhab	0.000169674	-0.329059	0.704	0.897	-0.193	1	1_Resting
Dynll1	0.000171867	-0.343603	0.938	0.981	-0.043	1	1_Resting
Nradd	0.00017201	-0.237994	0.037	0.21	-0.173	1	1_Resting
2007-09-01	0.000173761	-0.257114	0.605	0.87	-0.265	1	1_Resting
Mrpl27	0.000177224	-0.228332	0.346	0.658	-0.312	1	1_Resting
Cited2	0.000179385	-0.436145	0.247	0.476	-0.229	1	1_Resting
Kif1b	0.000181108	-0.262085	0.284	0.558	-0.274	1	1_Resting
Dock4	0.000181206	-0.216081	0.037	0.212	-0.175	1	1_Resting
Bcl10	0.000182756	-0.228293	0.247	0.509	-0.262	1	1_Resting
Fabp3	0.000189631	-0.25906	0.037	0.209	-0.172	1	1_Resting
Psmb6	0.00019202	-0.263379	0.914	0.946	-0.032	1	1_Resting
Mylk	0.000193064	-0.358945	0.037	0.208	-0.171	1	1_Resting
Sgk1	0.000194072	-0.494778	0.395	0.65	-0.255	1	1_Resting
Tubb4b	0.000196851	-0.531995	0.593	0.816	-0.223	1	1_Resting
Tcp1	0.00020151	-0.270163	0.802	0.898	-0.096	1	1_Resting
Bag3	0.000203849	-0.247285	0.37	0.68	-0.31	1	1_Resting
Pcsk6	0.000204677	-0.330216	0.173	0.407	-0.234	1	1_Resting
Orai1	0.000205351	0.335919	0.383	0.265	0.118	1	1_Resting
Dnajb4	0.000206865	-0.205929	0.173	0.419	-0.246	1	1_Resting
Cmtm5	0.000207193	0.336445	0.346	0.224	0.122	1	1_Resting
Bet1	0.000208664	-0.206823	0.321	0.636	-0.315	1	1_Resting
Cdr2l	0.000209012	-0.260806	0.136	0.347	-0.211	1	1_Resting
Tet3	0.000210065	0.365913	0.42	0.307	0.113	1	1_Resting
Micall1	0.000212739	-0.25351	0.123	0.337	-0.214	1	1_Resting
Sec61g	0.000214199	-0.277001	0.975	0.981	-0.006	1	1_Resting
Pcf11	0.000214242	-0.327579	0.321	0.595	-0.274	1	1_Resting
Pou3f1	0.000216391	0.218954	0.247	0.122	0.125	1	1_Resting
Nfatc2	0.000216925	-0.383674	0.259	0.496	-0.237	1	1_Resting
Nfkbia	0.000217829	-0.471079	0.617	0.801	-0.184	1	1_Resting
Mdm2	0.000218298	-0.239586	0.333	0.631	-0.298	1	1_Resting
Rai14	0.000220379	-0.335037	0.148	0.364	-0.216	1	1_Resting
Arf2	0.000220407	-0.203393	0.296	0.588	-0.292	1	1_Resting
Wnt5b	0.000221308	-0.219949	0.247	0.51	-0.263	1	1_Resting
Uqcrc2	0.000222334	-0.246394	0.469	0.764	-0.295	1	1_Resting
Sec13	0.000223651	-0.257338	0.605	0.846	-0.241	1	1_Resting
2004-09-01	0.000225175	-0.251526	0.049	0.226	-0.177	1	1_Resting
Tubb2a	0.000226393	0.305124	0.852	0.783	0.069	1	1_Resting
Sdhaf4	0.000231173	0.334971	0.568	0.534	0.034	1	1_Resting
Inppl1	0.000231539	0.3255	0.457	0.341	0.116	1	1_Resting
Osmr	0.000239752	-0.225119	0.185	0.433	-0.248	1	1_Resting
Ccng1	0.000242699	-0.227907	0.235	0.483	-0.248	1	1_Resting
Ptma	0.000243224	-0.345889	1	0.999	0.001	1	1_Resting
Atp5g1	0.000243991	-0.289781	0.938	0.967	-0.029	1	1_Resting
Gramd2	0.000253169	-0.215309	0.247	0.49	-0.243	1	1_Resting
Fkbp10	0.000255483	0.217543	0.975	0.982	-0.007	1	1_Resting
Gm10076	0.000257665	-0.289982	0.654	0.875	-0.221	1	1_Resting
Eef1d	0.0002591	-0.234796	0.926	0.963	-0.037	1	1_Resting
Rsrc1	0.000259873	-0.238392	0.395	0.718	-0.323	1	1_Resting
Rpl17	0.000262515	-0.264211	0.988	0.996	-0.008	1	1_Resting
Timm8a1	0.000265486	-0.204472	0.259	0.526	-0.267	1	1_Resting
Ddb1	0.000266438	-0.250407	0.802	0.926	-0.124	1	1_Resting
Srsf7	0.000287754	-0.280317	0.593	0.854	-0.261	1	1_Resting
Higd1a	0.000288429	-0.8928	0.901	0.918	-0.017	1	1_Resting
Pkm	0.000293827	-0.562439	0.926	0.962	-0.036	1	1_Resting
Yod1	0.000294357	-0.362657	0.16	0.377	-0.217	1	1_Resting
Gar1	0.000297112	-0.219278	0.321	0.607	-0.286	1	1_Resting
Tars	0.000300679	-0.217635	0.284	0.552	-0.268	1	1_Resting
Acp1	0.000303119	-0.270068	0.531	0.761	-0.23	1	1_Resting
Emb	0.000307724	-0.310842	0.21	0.436	-0.226	1	1_Resting
Ninj1	0.000308149	0.376366	0.494	0.376	0.118	1	1_Resting
Spg21	0.000308696	-0.212208	0.198	0.442	-0.244	1	1_Resting
Cdc34	0.000308946	-0.205824	0.198	0.438	-0.24	1	1_Resting
Psmd12	0.000312397	-0.254321	0.42	0.681	-0.261	1	1_Resting
Hnrnpm	0.000313677	-0.275294	0.617	0.873	-0.256	1	1_Resting
Cdc42ep3	0.000316127	0.503459	0.593	0.523	0.07	1	1_Resting
Cdo1	0.000318564	-0.356954	0.099	0.284	-0.185	1	1_Resting
Rbp1	0.000318908	-0.384623	0.062	0.228	-0.166	1	1_Resting
Slc35e4	0.000319597	-0.220208	0.148	0.362	-0.214	1	1_Resting
Irf2bp1	0.000320317	0.258843	0.284	0.163	0.121	1	1_Resting
Cul1	0.000323333	-0.283901	0.432	0.729	-0.297	1	1_Resting
Tkt	0.000341197	-0.241768	0.802	0.898	-0.096	1	1_Resting
Mapre1	0.000342216	-0.259462	0.63	0.893	-0.263	1	1_Resting
Loxl4	0.000346104	-0.268767	0.086	0.277	-0.191	1	1_Resting
Tgfbr2	0.000349039	0.432895	0.556	0.527	0.029	1	1_Resting
Dusp14	0.000349142	-0.24397	0.086	0.281	-0.195	1	1_Resting
Lamp1	0.000351581	-0.353346	0.864	0.962	-0.098	1	1_Resting
Eif3c	0.000352193	-0.266074	0.765	0.924	-0.159	1	1_Resting
Hexa	0.000352822	0.340426	0.753	0.757	-0.004	1	1_Resting
Csrp1	0.000356035	-0.277488	0.21	0.437	-0.227	1	1_Resting
Ece1	0.000356096	-0.217217	0.049	0.222	-0.173	1	1_Resting
Egln1	0.000362958	-0.397811	0.494	0.7	-0.206	1	1_Resting
Cd200	0.000366504	-0.420715	0.222	0.425	-0.203	1	1_Resting
Wwtr1	0.000366511	0.347243	0.864	0.847	0.017	1	1_Resting
Klhl21	0.0003666	-0.252635	0.259	0.513	-0.254	1	1_Resting
Itpr3	0.000367031	0.361923	0.333	0.222	0.111	1	1_Resting
Psmb4	0.000367486	-0.28177	0.852	0.956	-0.104	1	1_Resting
Ndufb5	0.000367519	-0.211691	0.79	0.94	-0.15	1	1_Resting
Lrrc75b	0.00037184	0.278476	0.222	0.112	0.11	1	1_Resting
Pam16	0.000375393	-0.245935	0.407	0.706	-0.299	1	1_Resting
Tpm2	0.000386079	-0.824525	0.173	0.35	-0.177	1	1_Resting
Abce1	0.000389369	-0.211948	0.358	0.645	-0.287	1	1_Resting
Itgav	0.000393306	-0.287277	0.296	0.564	-0.268	1	1_Resting
Sf3b6	0.000394655	-0.269284	0.679	0.869	-0.19	1	1_Resting
Prpf40a	0.000401187	-0.238186	0.556	0.81	-0.254	1	1_Resting
Tubb5	0.000408269	-0.911477	0.765	0.891	-0.126	1	1_Resting
Uaca	0.000409095	-0.284687	0.16	0.366	-0.206	1	1_Resting
Arhgef25	0.000409175	0.315629	0.457	0.351	0.106	1	1_Resting
Fam162a	0.000412493	-0.658921	0.716	0.834	-0.118	1	1_Resting
Itm2c	0.000412669	0.292455	0.852	0.845	0.007	1	1_Resting
Bcl9l	0.000414335	0.301027	0.432	0.311	0.121	1	1_Resting
Nrip1	0.000415974	-0.259357	0.222	0.466	-0.244	1	1_Resting
D830025C05Rik	0.000416001	-0.230164	0.099	0.289	-0.19	1	1_Resting
Nipbl	0.000441543	-0.202809	0.457	0.754	-0.297	1	1_Resting
Ptov1	0.000447399	0.295715	0.914	0.941	-0.027	1	1_Resting
Svil	0.000452217	-0.228807	0.062	0.232	-0.17	1	1_Resting
Dst	0.00045439	-0.252222	0.284	0.545	-0.261	1	1_Resting
Spc24	0.000460761	-0.297918	0.062	0.227	-0.165	1	1_Resting
Ndufa10	0.000460935	-0.247774	0.457	0.733	-0.276	1	1_Resting
Cyc1	0.000464622	-0.229912	0.494	0.766	-0.272	1	1_Resting
Mgst3	0.000468501	-0.209029	0.074	0.254	-0.18	1	1_Resting
Gpr180	0.000470189	0.350422	0.642	0.638	0.004	1	1_Resting
Ube2i	0.000473443	-0.232461	0.79	0.894	-0.104	1	1_Resting
Bcl2l11	0.000490181	-0.227246	0.21	0.445	-0.235	1	1_Resting
Rab1a	0.000500721	-0.232905	0.704	0.872	-0.168	1	1_Resting
Ubl5	0.000502176	-0.237861	0.753	0.919	-0.166	1	1_Resting
Grn	0.000507339	0.365489	0.654	0.643	0.011	1	1_Resting
Bglap	0.000513612	-3.55587	0.136	0.319	-0.183	1	1_Resting
Smdt1	0.000514189	-0.239939	0.753	0.927	-0.174	1	1_Resting
Dnm1	0.000515477	0.453841	0.432	0.338	0.094	1	1_Resting
Epha4	0.000516384	0.373383	0.284	0.162	0.122	1	1_Resting
Lsm5	0.000529342	-0.243782	0.494	0.729	-0.235	1	1_Resting
Ndufa1	0.000531314	-0.257056	0.679	0.861	-0.182	1	1_Resting
1110065P20Rik	0.000533162	0.338396	0.728	0.742	-0.014	1	1_Resting
Bmp3	0.000534873	0.539268	0.247	0.13	0.117	1	1_Resting
Hist1h2ac	0.000539619	-0.423525	0.123	0.305	-0.182	1	1_Resting
Tacc1	0.00054583	-0.240994	0.42	0.692	-0.272	1	1_Resting
Tmed3	0.000546895	0.331193	0.938	0.942	-0.004	1	1_Resting
Ccar1	0.00055012	-0.234688	0.395	0.676	-0.281	1	1_Resting
Prelp	0.000561539	-1.21195	0.679	0.633	0.046	1	1_Resting
Nfkbiz	0.000569924	-0.351459	0.309	0.555	-0.246	1	1_Resting
Taldo1	0.000573068	-0.273129	0.568	0.806	-0.238	1	1_Resting
Mtpn	0.000577069	-0.220501	0.407	0.695	-0.288	1	1_Resting
Cxxc5	0.000577211	0.347893	0.469	0.38	0.089	1	1_Resting
Nomo1	0.000580956	-0.209727	0.383	0.651	-0.268	1	1_Resting
Gli2	0.000581311	0.239699	0.247	0.136	0.111	1	1_Resting
Lgals1	0.000581365	-1.57259	0.481	0.601	-0.12	1	1_Resting
Kpnb1	0.000583194	-0.203072	0.395	0.667	-0.272	1	1_Resting
Ndufc1	0.000595709	-0.22443	0.753	0.903	-0.15	1	1_Resting
Raly	0.000599213	-0.335731	0.605	0.842	-0.237	1	1_Resting
Bax	0.000600592	-0.310898	0.531	0.772	-0.241	1	1_Resting
Slc35a2	0.000605474	0.365485	0.679	0.655	0.024	1	1_Resting
Eif1ad	0.000612853	-0.200845	0.284	0.544	-0.26	1	1_Resting
Nptn	0.00061645	-0.329345	0.543	0.798	-0.255	1	1_Resting
Ssbp4	0.000624846	-0.242131	0.173	0.379	-0.206	1	1_Resting
Mafb	0.000628344	-0.537102	0.284	0.474	-0.19	1	1_Resting
Pten	0.000634079	-0.204274	0.321	0.609	-0.288	1	1_Resting
Plxnd1	0.000635069	-0.304811	0.086	0.259	-0.173	1	1_Resting
Hspa5	0.000643697	-0.432739	0.988	0.997	-0.009	1	1_Resting
Ube2n	0.000645234	-0.270145	0.556	0.796	-0.24	1	1_Resting
Foxp2	0.000648949	0.379061	0.235	0.124	0.111	1	1_Resting
Slirp	0.0006503	-0.215733	0.481	0.745	-0.264	1	1_Resting
Gstm5	0.000652485	0.327337	0.753	0.778	-0.025	1	1_Resting
Tm2d3	0.000658896	0.417407	0.407	0.319	0.088	1	1_Resting
Anxa5	0.000659215	-0.254113	0.988	0.976	0.012	1	1_Resting
1190002N15Rik	0.000684431	0.315765	0.63	0.588	0.042	1	1_Resting
Hnrnpdl	0.000684855	-0.299895	0.716	0.912	-0.196	1	1_Resting
Snhg6	0.000686039	-0.312843	0.654	0.835	-0.181	1	1_Resting
Ywhaz	0.000690864	-0.302119	0.691	0.906	-0.215	1	1_Resting
Sh3gl1	0.000691088	0.287263	0.58	0.562	0.018	1	1_Resting
Mettl9	0.000696254	0.297413	0.741	0.801	-0.06	1	1_Resting
Npm3	0.000701164	-0.211458	0.309	0.569	-0.26	1	1_Resting
Hspb11	0.000725244	-0.265452	0.506	0.733	-0.227	1	1_Resting
Smc6	0.000736893	-0.260483	0.444	0.73	-0.286	1	1_Resting
Denr	0.000738209	-0.265889	0.568	0.802	-0.234	1	1_Resting
Cxcl12	0.000747889	-2.99555	0.123	0.279	-0.156	1	1_Resting
Gpx1	0.000756078	-0.30197	0.58	0.819	-0.239	1	1_Resting
Atp5j	0.000758597	-0.229297	0.901	0.971	-0.07	1	1_Resting
Mt2	0.000773588	-0.452171	0.074	0.234	-0.16	1	1_Resting
Maged1	0.00077769	0.247082	0.963	0.963	0	1	1_Resting
Acsf2	0.00079273	0.331901	0.333	0.227	0.106	1	1_Resting
Pdlim2	0.000793508	-0.293013	0.074	0.233	-0.159	1	1_Resting
Bicc1	0.000797685	-0.397929	0.37	0.627	-0.257	1	1_Resting
Cadm1	0.000814416	-0.268603	0.222	0.455	-0.233	1	1_Resting
Ppp1cb	0.00081909	-0.224912	0.593	0.857	-0.264	1	1_Resting
Sec62	0.000819372	0.266186	0.938	0.948	-0.01	1	1_Resting
Arpc4	0.000826637	-0.283752	0.556	0.795	-0.239	1	1_Resting
Gtf2e2	0.000831433	-0.206168	0.333	0.585	-0.252	1	1_Resting
Cd63	0.000840162	-0.589674	1	0.998	0.002	1	1_Resting
Sec11a	0.000840575	-0.200682	0.864	0.908	-0.044	1	1_Resting
Pdgfa	0.000842786	-0.389531	0.272	0.478	-0.206	1	1_Resting
Nrtn	0.000854829	0.212839	0.21	0.108	0.102	1	1_Resting
Chpf	0.000857236	0.335059	0.568	0.511	0.057	1	1_Resting
Dmac1	0.00086586	-0.204835	0.321	0.58	-0.259	1	1_Resting
Gna12	0.000867581	-0.213675	0.358	0.627	-0.269	1	1_Resting
Tef	0.000872403	0.38513	0.395	0.302	0.093	1	1_Resting
Arrdc4	0.000875994	-0.265123	0.111	0.293	-0.182	1	1_Resting
Csrp2	0.00088119	-0.265948	0.21	0.434	-0.224	1	1_Resting
Nudc	0.000881976	-0.309999	0.593	0.781	-0.188	1	1_Resting
Adk	0.000886323	-0.409262	0.679	0.77	-0.091	1	1_Resting
Eid1	0.000891052	0.25726	0.951	0.93	0.021	1	1_Resting
Arhgap5	0.000901421	0.295631	0.667	0.677	-0.01	1	1_Resting
Zfp644	0.000904566	0.339767	0.617	0.598	0.019	1	1_Resting
Ddx50	0.000905752	0.507138	0.704	0.789	-0.085	1	1_Resting
Ndufa3	0.000910919	-0.231543	0.457	0.718	-0.261	1	1_Resting
Ctsh	0.000920875	-0.295063	0.383	0.65	-0.267	1	1_Resting
Scara3	0.000925088	0.302924	0.556	0.394	0.162	1	1_Resting
Rbm17	0.000928647	-0.280761	0.556	0.746	-0.19	1	1_Resting
Eif3h	0.0009439	-0.21242	0.926	0.968	-0.042	1	1_Resting
Psma4	0.000959123	-0.258183	0.753	0.894	-0.141	1	1_Resting
Spcs2	0.000960859	-0.287977	0.753	0.905	-0.152	1	1_Resting
Tfrc	0.000963712	0.468907	0.457	0.386	0.071	1	1_Resting
Atp5d	0.000973151	-0.239923	0.938	0.976	-0.038	1	1_Resting
Atp5k	0.00097549	-0.241264	0.642	0.876	-0.234	1	1_Resting
Smpd3	0.000978992	-0.772608	0.531	0.665	-0.134	1	1_Resting
Serpine1	0.000985316	-0.329844	0.136	0.324	-0.188	1	1_Resting
Hsp90b1	0.000989887	-0.366251	0.975	0.992	-0.017	1	1_Resting
Pdia4	0.000993475	-0.21986	0.58	0.812	-0.232	1	1_Resting
Tmem176b	0.00100128	-0.693495	0.63	0.837	-0.207	1	1_Resting
Uqcrc1	0.00102344	-0.249217	0.469	0.721	-0.252	1	1_Resting
Tbcb	0.00102599	-0.214402	0.481	0.746	-0.265	1	1_Resting
Ech1	0.0010286	-0.200415	0.37	0.647	-0.277	1	1_Resting
Map1a	0.00103074	0.306777	0.309	0.203	0.106	1	1_Resting
Sox6	0.00104418	0.411741	0.642	0.578	0.064	1	1_Resting
Atxn7l3b	0.00104495	0.360519	0.802	0.805	-0.003	1	1_Resting
Pitx1	0.00104685	0.334934	0.383	0.294	0.089	1	1_Resting
Mafg	0.00104877	-0.213154	0.346	0.616	-0.27	1	1_Resting
Eps8	0.00105719	0.403806	0.321	0.22	0.101	1	1_Resting
Psma6	0.00105964	-0.220715	0.58	0.833	-0.253	1	1_Resting
Cyb5r3	0.00108223	-0.243264	0.432	0.705	-0.273	1	1_Resting
Dync1h1	0.00109124	-0.275508	0.444	0.703	-0.259	1	1_Resting
Colgalt1	0.00109148	0.266561	0.889	0.859	0.03	1	1_Resting
Frmd6	0.00109675	-0.366974	0.358	0.576	-0.218	1	1_Resting
Mthfd2	0.00110034	-0.269591	0.469	0.692	-0.223	1	1_Resting
Cdc26	0.00110689	0.26205	0.765	0.739	0.026	1	1_Resting
Myl12b	0.00114891	-0.232349	0.333	0.598	-0.265	1	1_Resting
Arpc3	0.00115982	-0.259322	0.691	0.885	-0.194	1	1_Resting
Picalm	0.00116949	-0.21859	0.37	0.647	-0.277	1	1_Resting
Uba52	0.00117102	-0.221041	0.827	0.926	-0.099	1	1_Resting
Tsc22d1	0.00117159	-0.346879	0.889	0.946	-0.057	1	1_Resting
Tma7	0.00122401	-0.232059	0.778	0.914	-0.136	1	1_Resting
Lmnb1	0.00122653	-0.232661	0.123	0.3	-0.177	1	1_Resting
Sc5d	0.00122657	-0.226019	0.296	0.526	-0.23	1	1_Resting
Cenpa	0.001245	-0.505568	0.074	0.224	-0.15	1	1_Resting
Elob	0.00126775	-0.228242	0.926	0.981	-0.055	1	1_Resting
Ptges3	0.0013104	-0.239742	0.617	0.833	-0.216	1	1_Resting
Naga	0.00131284	0.279578	0.531	0.505	0.026	1	1_Resting
Etfa	0.00132381	-0.214954	0.42	0.671	-0.251	1	1_Resting
Hdlbp	0.0013249	-0.200715	0.988	0.974	0.014	1	1_Resting
Ooep	0.00132505	0.282304	0.457	0.353	0.104	1	1_Resting
Sarnp	0.00134681	-0.207433	0.494	0.765	-0.271	1	1_Resting
Papss1	0.00137074	-0.215729	0.432	0.715	-0.283	1	1_Resting
mt-Nd3	0.00137172	-0.225326	0.975	0.996	-0.021	1	1_Resting
Sys1	0.00139116	-0.210537	0.469	0.728	-0.259	1	1_Resting
Ndufs3	0.00140241	-0.207923	0.506	0.805	-0.299	1	1_Resting
Psmd4	0.00140942	-0.210473	0.519	0.788	-0.269	1	1_Resting
Kctd12	0.00142619	-0.614505	0.247	0.422	-0.175	1	1_Resting
Bhlhe41	0.00146397	0.350982	0.42	0.323	0.097	1	1_Resting
Wls	0.00149562	-0.50892	0.494	0.681	-0.187	1	1_Resting
Usp53	0.00156142	0.444149	0.383	0.296	0.087	1	1_Resting
Selenow	0.00156911	0.260845	0.914	0.948	-0.034	1	1_Resting
Dnajb6	0.00156972	-0.231454	0.556	0.818	-0.262	1	1_Resting
Abcc5	0.0015724	0.325123	0.333	0.225	0.108	1	1_Resting
Hey1	0.00157669	-0.218753	0.099	0.262	-0.163	1	1_Resting
Nog	0.00158634	-0.22022	0.185	0.379	-0.194	1	1_Resting
Twsg1	0.00159193	0.294844	0.642	0.606	0.036	1	1_Resting
Stat5a	0.00161409	0.2811	0.235	0.131	0.104	1	1_Resting
Snu13	0.00162145	-0.242385	0.741	0.902	-0.161	1	1_Resting
Agbl3	0.00163672	-0.286819	0.099	0.257	-0.158	1	1_Resting
Ybx3	0.0016442	-0.226804	0.593	0.801	-0.208	1	1_Resting
Ubap2l	0.00167131	0.242415	0.728	0.743	-0.015	1	1_Resting
Clic1	0.00167701	-0.2745	0.568	0.812	-0.244	1	1_Resting
Galk1	0.00169069	-0.264198	0.593	0.777	-0.184	1	1_Resting
Selenop	0.00178131	-0.407674	0.123	0.281	-0.158	1	1_Resting
Fto	0.00178202	0.320918	0.568	0.555	0.013	1	1_Resting
Pdlim7	0.00178517	-0.203707	0.198	0.394	-0.196	1	1_Resting
Foxp1	0.00179381	-0.370826	0.198	0.379	-0.181	1	1_Resting
Nfkb1	0.00179431	-0.323163	0.346	0.581	-0.235	1	1_Resting
Avpi1	0.00179969	-0.213769	0.247	0.452	-0.205	1	1_Resting
Map7d3	0.00181138	0.284878	0.259	0.158	0.101	1	1_Resting
Tsc22d4	0.00183593	0.388954	0.605	0.588	0.017	1	1_Resting
Dstn	0.00184955	-0.333431	0.889	0.97	-0.081	1	1_Resting
Bglap2	0.00186901	-2.60608	0.086	0.232	-0.146	1	1_Resting
Col6a3	0.00188358	-0.670464	0.753	0.875	-0.122	1	1_Resting
Hba-a2	0.00189166	-0.529173	0.63	0.597	0.033	1	1_Resting
Dab2	0.0018957	0.375045	0.543	0.511	0.032	1	1_Resting
Slc35e3	0.00191212	0.3648	0.716	0.615	0.101	1	1_Resting
Cenpx	0.00191718	0.281538	0.654	0.613	0.041	1	1_Resting
Fbln1	0.00193292	-0.342604	0.198	0.389	-0.191	1	1_Resting
H3f3b	0.00196548	-0.26759	1	1	0	1	1_Resting
Rrm1	0.0019673	-0.24465	0.123	0.292	-0.169	1	1_Resting
App	0.00198234	0.260268	0.975	0.972	0.003	1	1_Resting
Dhrs3	0.00199996	0.301857	0.444	0.364	0.08	1	1_Resting
Oat	0.00201354	-0.219378	0.827	0.925	-0.098	1	1_Resting
Snrpg	0.00201645	-0.2294	0.802	0.927	-0.125	1	1_Resting
Srp9	0.00202847	-0.231005	0.901	0.962	-0.061	1	1_Resting
Rpn1	0.00204937	-0.236928	0.852	0.91	-0.058	1	1_Resting
Ssr1	0.00205834	-0.201008	0.877	0.957	-0.08	1	1_Resting
Tmem263	0.00206399	0.216136	0.778	0.748	0.03	1	1_Resting
Ube2s	0.00207463	-0.353728	0.889	0.96	-0.071	1	1_Resting
Hipk1	0.00211064	-0.219724	0.395	0.66	-0.265	1	1_Resting
Smc4	0.00211617	-0.25908	0.284	0.509	-0.225	1	1_Resting
Mtch1	0.00213688	-0.294627	0.753	0.909	-0.156	1	1_Resting
Psmb2	0.00215465	-0.252589	0.815	0.911	-0.096	1	1_Resting
Prcp	0.00217949	-0.275948	0.16	0.334	-0.174	1	1_Resting
Rbx1	0.00220133	-0.236426	0.852	0.938	-0.086	1	1_Resting
Stox2	0.00224451	-0.292117	0.111	0.259	-0.148	1	1_Resting
Mrpl30	0.00224907	-0.205772	0.58	0.842	-0.262	1	1_Resting
Tead2	0.00225264	-0.227567	0.099	0.246	-0.147	1	1_Resting
Smc2	0.00226123	-0.315398	0.099	0.249	-0.15	1	1_Resting
Igfbp4	0.00227511	-0.781765	0.642	0.462	0.18	1	1_Resting
St3gal6	0.00229245	-0.306041	0.309	0.536	-0.227	1	1_Resting
Hmgn3	0.00231267	-0.282013	0.296	0.506	-0.21	1	1_Resting
Dlg5	0.00234713	-0.205095	0.086	0.237	-0.151	1	1_Resting
Akirin1	0.00235339	-0.204929	0.333	0.57	-0.237	1	1_Resting
Ank	0.00235393	-0.272935	0.111	0.27	-0.159	1	1_Resting
Marcks	0.00236689	-1.18383	0.432	0.559	-0.127	1	1_Resting
Cdk1	0.00240808	-0.377837	0.074	0.213	-0.139	1	1_Resting
Sox8	0.0024133	0.393555	0.383	0.296	0.087	1	1_Resting
Smim5	0.00241551	-0.206114	0.123	0.287	-0.164	1	1_Resting
Glt8d2	0.00242025	0.215173	0.259	0.161	0.098	1	1_Resting
Gpsm1	0.00247498	0.337919	0.383	0.306	0.077	1	1_Resting
Phf10	0.00248281	-0.203967	0.358	0.617	-0.259	1	1_Resting
Nucb1	0.0025317	0.298004	0.864	0.906	-0.042	1	1_Resting
Gnb2	0.00253751	-0.296687	0.827	0.962	-0.135	1	1_Resting
Marcksl1	0.00254124	-0.286317	0.346	0.581	-0.235	1	1_Resting
Ccnd2	0.00256442	-0.225761	0.531	0.761	-0.23	1	1_Resting
Dlg4	0.00257104	0.22529	0.259	0.153	0.106	1	1_Resting
Twist1	0.00269487	-0.417277	0.173	0.324	-0.151	1	1_Resting
Myl9	0.00271745	-0.745512	0.136	0.276	-0.14	1	1_Resting
Lima1	0.00272251	-0.217122	0.136	0.303	-0.167	1	1_Resting
Cib2	0.00272961	0.216019	0.296	0.2	0.096	1	1_Resting
Tecr	0.00278906	-0.201478	0.617	0.84	-0.223	1	1_Resting
Fam114a1	0.00279385	0.362955	0.679	0.695	-0.016	1	1_Resting
Fam208a	0.00279662	0.232422	0.346	0.246	0.1	1	1_Resting
Mpc2	0.00280018	-0.217626	0.593	0.832	-0.239	1	1_Resting
Cmtm3	0.00281623	-0.293538	0.086	0.224	-0.138	1	1_Resting
Pkd1	0.00282832	0.471928	0.469	0.427	0.042	1	1_Resting
Npc2	0.00284346	-0.216917	0.852	0.953	-0.101	1	1_Resting
Uqcr10	0.00286201	-0.229403	0.84	0.947	-0.107	1	1_Resting
Cryl1	0.00286365	0.342991	0.395	0.33	0.065	1	1_Resting
Snrpb2	0.00290498	-0.216718	0.444	0.702	-0.258	1	1_Resting
Prdx5	0.00293855	-0.230235	0.914	0.945	-0.031	1	1_Resting
Zfp354c	0.00308029	0.325695	0.42	0.357	0.063	1	1_Resting
Gaa	0.00309378	0.203012	0.741	0.732	0.009	1	1_Resting
Scube2	0.00315048	0.372453	0.346	0.254	0.092	1	1_Resting
Acan	0.00316326	0.405659	1	0.846	0.154	1	1_Resting
Sf3b5	0.00324396	-0.236507	0.654	0.835	-0.181	1	1_Resting
Naxe	0.00328836	0.30945	0.642	0.667	-0.025	1	1_Resting
Zfhx4	0.00331131	-0.475165	0.185	0.349	-0.164	1	1_Resting
Taf10	0.00333756	-0.206934	0.63	0.84	-0.21	1	1_Resting
Nt5c3b	0.00338998	0.299409	0.444	0.387	0.057	1	1_Resting
Slc38a2	0.00339903	0.365426	0.938	0.95	-0.012	1	1_Resting
Son	0.0034112	0.276753	0.914	0.955	-0.041	1	1_Resting
Wdr89	0.00356783	-0.202491	0.691	0.867	-0.176	1	1_Resting
Qsox1	0.00361189	-0.58409	0.457	0.656	-0.199	1	1_Resting
Phyh	0.00362825	0.414129	0.556	0.506	0.05	1	1_Resting
Ppp2ca	0.00373166	-0.210376	0.704	0.917	-0.213	1	1_Resting
Mrpl20	0.00375245	-0.217569	0.741	0.892	-0.151	1	1_Resting
Trib2	0.00380084	0.237552	0.235	0.144	0.091	1	1_Resting
Calm3	0.00383322	-0.232422	0.642	0.852	-0.21	1	1_Resting
Efna5	0.00384567	-0.306179	0.099	0.238	-0.139	1	1_Resting
Impact	0.00385975	0.252298	0.383	0.299	0.084	1	1_Resting
Per3	0.00388294	0.379365	0.247	0.158	0.089	1	1_Resting
Mbtps1	0.00398061	0.270426	0.642	0.686	-0.044	1	1_Resting
Adam12	0.00412972	-0.2463	0.185	0.357	-0.172	1	1_Resting
Eif5b	0.00416653	0.307239	0.704	0.8	-0.096	1	1_Resting
Foxc1	0.00417035	-0.204746	0.432	0.697	-0.265	1	1_Resting
Sidt2	0.00437658	-0.229199	0.37	0.577	-0.207	1	1_Resting
Map1lc3b	0.00444725	-0.417053	0.84	0.939	-0.099	1	1_Resting
Fat3	0.00450848	-0.219042	0.136	0.29	-0.154	1	1_Resting
Ankrd11	0.00452748	-0.207218	0.753	0.919	-0.166	1	1_Resting
Fermt2	0.00456741	-0.25929	0.556	0.761	-0.205	1	1_Resting
Fam46a	0.00470466	0.347103	0.679	0.655	0.024	1	1_Resting
Derl1	0.00470852	0.267113	0.716	0.755	-0.039	1	1_Resting
Rspo3	0.00478687	-0.279707	0.222	0.4	-0.178	1	1_Resting
Mtdh	0.004793	-0.213949	0.679	0.897	-0.218	1	1_Resting
Mrpl57	0.00479423	-0.219283	0.593	0.767	-0.174	1	1_Resting
Tnnt3	0.00480389	-0.217306	0.111	0.254	-0.143	1	1_Resting
Col1a2	0.00483451	-1.60512	1	0.995	0.005	1	1_Resting
Rabac1	0.0049225	0.217994	0.877	0.904	-0.027	1	1_Resting
Rarg	0.00492358	0.329978	0.519	0.504	0.015	1	1_Resting
Ptp4a1	0.00503349	-0.274227	0.741	0.894	-0.153	1	1_Resting
Angptl2	0.00515232	0.270849	0.679	0.606	0.073	1	1_Resting
Nbl1	0.00516536	-0.229195	0.086	0.219	-0.133	1	1_Resting
Snrpd3	0.00524626	-0.207412	0.593	0.822	-0.229	1	1_Resting
Trp53i13	0.00536592	0.276664	0.568	0.566	0.002	1	1_Resting
Ntan1	0.0054617	-0.225079	0.556	0.756	-0.2	1	1_Resting
Pde3a	0.00546347	0.409887	0.42	0.359	0.061	1	1_Resting
Ramp1	0.00550045	-0.363951	0.136	0.279	-0.143	1	1_Resting
Top3b	0.00550226	0.220706	0.284	0.194	0.09	1	1_Resting
H1fx	0.00551133	-0.291835	0.21	0.377	-0.167	1	1_Resting
Smarce1	0.00558507	-0.233001	0.494	0.724	-0.23	1	1_Resting
Scp2	0.00561099	0.282798	0.741	0.801	-0.06	1	1_Resting
Brd3	0.00562477	0.273094	0.531	0.489	0.042	1	1_Resting
Uqcrb	0.00572925	-0.216845	0.877	0.965	-0.088	1	1_Resting
Ints6l	0.00575023	0.411917	0.432	0.38	0.052	1	1_Resting
Hba-a1	0.0058498	-0.527325	0.704	0.748	-0.044	1	1_Resting
Gga2	0.00585379	0.305145	0.531	0.513	0.018	1	1_Resting
Gng5	0.00592342	-0.239371	0.988	0.974	0.014	1	1_Resting
Stard10	0.00595942	0.249848	0.296	0.214	0.082	1	1_Resting
Ppt1	0.00615293	0.208368	0.543	0.519	0.024	1	1_Resting
Pabpc4	0.00618204	-0.221294	0.593	0.759	-0.166	1	1_Resting
Rhoj	0.00624909	0.302824	0.272	0.176	0.096	1	1_Resting
Tcf25	0.00628691	-0.250023	0.765	0.89	-0.125	1	1_Resting
Cops9	0.00631113	-0.236792	0.679	0.892	-0.213	1	1_Resting
Rrm2	0.00648052	-0.251877	0.099	0.233	-0.134	1	1_Resting
Vmac	0.00653986	0.239601	0.235	0.149	0.086	1	1_Resting
Srp14	0.00657132	-0.232682	0.765	0.895	-0.13	1	1_Resting
Tspan13	0.00660202	0.280218	0.346	0.249	0.097	1	1_Resting
Ndufa4l2	0.00662186	-0.584779	0.543	0.638	-0.095	1	1_Resting
Csnk1a1	0.00677419	-0.238618	0.852	0.961	-0.109	1	1_Resting
Nsg1	0.00679169	-0.260002	0.099	0.224	-0.125	1	1_Resting
Thbs2	0.00684397	0.522098	0.42	0.329	0.091	1	1_Resting
Creb3l1	0.00700099	-0.503296	0.247	0.39	-0.143	1	1_Resting
Mki67	0.00706781	-0.367904	0.111	0.239	-0.128	1	1_Resting
Prdm5	0.00724909	0.206355	0.333	0.248	0.085	1	1_Resting
Tra2b	0.00725029	0.258261	0.84	0.885	-0.045	1	1_Resting
Sdc4	0.00733499	-0.516147	0.963	0.922	0.041	1	1_Resting
Rnf130	0.0073352	0.287107	0.519	0.5	0.019	1	1_Resting
Hif1a	0.00755308	0.275257	0.877	0.853	0.024	1	1_Resting
Pycr1	0.00756761	0.318358	0.531	0.518	0.013	1	1_Resting
Cab39	0.00767472	-0.21974	0.42	0.629	-0.209	1	1_Resting
Adamts10	0.00777384	0.222655	0.333	0.243	0.09	1	1_Resting
Nav2	0.00782153	-0.238685	0.284	0.456	-0.172	1	1_Resting
Tcaf1	0.00797702	0.321127	0.444	0.397	0.047	1	1_Resting
Cdkn2aip	0.00810117	0.224005	0.383	0.297	0.086	1	1_Resting
Nudcd2	0.00814743	-0.221804	0.642	0.806	-0.164	1	1_Resting
Smpdl3a	0.00822792	0.303962	0.457	0.414	0.043	1	1_Resting
Pdgfrb	0.00825505	-0.607578	0.148	0.268	-0.12	1	1_Resting
Ssr2	0.00825679	-0.210407	0.963	0.983	-0.02	1	1_Resting
Ctgf	0.00831872	0.752807	0.84	0.853	-0.013	1	1_Resting
Use1	0.00851107	-0.206455	0.568	0.757	-0.189	1	1_Resting
Fzd7	0.00855895	0.246987	0.259	0.174	0.085	1	1_Resting
Car8	0.00858056	0.270491	0.321	0.222	0.099	1	1_Resting
Dynlrb1	0.00858594	0.202281	0.877	0.886	-0.009	1	1_Resting
Kdm6b	0.00863362	-0.272289	0.593	0.798	-0.205	1	1_Resting
Ckap4	0.0087589	-0.278743	0.951	0.947	0.004	1	1_Resting
Uqcc2	0.00877526	-0.203913	0.778	0.886	-0.108	1	1_Resting
Tnfrsf11b	0.00885958	0.230683	0.284	0.2	0.084	1	1_Resting
L3hypdh	0.00888355	0.258808	0.296	0.223	0.073	1	1_Resting
Gjc3	0.00903352	0.317748	0.272	0.193	0.079	1	1_Resting
Kazald1	0.00923167	0.23669	0.543	0.406	0.137	1	1_Resting
Klhl5	0.00926513	0.307463	0.346	0.28	0.066	1	1_Resting
Psip1	0.00944706	-0.252159	0.383	0.571	-0.188	1	1_Resting
Tmed5	0.00974873	-0.216713	0.296	0.492	-0.196	1	1_Resting
Tbx15	0.00988078	0.239542	0.42	0.346	0.074	1	1_Resting
Grpel1	0.00994243	-0.224755	0.506	0.706	-0.2	1	1_Resting
Gm1673	0.00999099	0.257189	0.531	0.488	0.043	1	1_Resting

## Sheet: maturing chondrocytes
gene	p_val	avg_log2FC	% in this cluster	% in all other cells	% difference	p_val_adj	cluster
Ucma	3.12452e-300	2.24067	0.995	0.484	0.511	7.03486e-296	2_Chondro
Col9a2	1.00059e-240	1.40133	1	0.772	0.228	2.25284e-236	2_Chondro
1500015O10Rik	1.67776e-234	1.62512	0.988	0.552	0.436	3.77747e-230	2_Chondro
Meltf	7.20045e-222	1.07983	0.946	0.449	0.497	1.62118e-217	2_Chondro
Scrg1	3.32217e-221	1.28692	0.987	0.461	0.526	7.47986e-217	2_Chondro
Meg3	1.15097e-218	1.82514	0.986	0.583	0.403	2.5914e-214	2_Chondro
Itm2a	2.25843e-212	1.17388	0.999	0.875	0.124	5.08486e-208	2_Chondro
Matn1	3.38783e-208	1.59166	0.991	0.625	0.366	7.6277e-204	2_Chondro
Mia	4.62792e-204	1.35162	0.997	0.551	0.446	1.04198e-199	2_Chondro
Chadl	8.14097e-195	1.05861	0.993	0.529	0.464	1.83294e-190	2_Chondro
Col9a3	7.63186e-191	1.3152	1	0.822	0.178	1.71831e-186	2_Chondro
Tmsb10	1.05217e-187	-1.53892	0.914	0.981	-0.067	2.36897e-183	2_Chondro
Thbs3	3.67738e-187	1.0587	0.978	0.582	0.396	8.27963e-183	2_Chondro
Nfatc2	6.4813e-186	1.61141	0.824	0.362	0.462	1.45926e-181	2_Chondro
Epyc	9.47565e-182	1.30352	0.986	0.535	0.451	2.13344e-177	2_Chondro
Fmod	3.67705e-181	1.11525	0.999	0.817	0.182	8.27888e-177	2_Chondro
Pcolce2	3.58258e-180	1.20431	0.977	0.592	0.385	8.06618e-176	2_Chondro
H19	1.77594e-179	1.30375	1	0.764	0.236	3.99852e-175	2_Chondro
Alpl	2.02858e-177	-2.32442	0.173	0.722	-0.549	4.56735e-173	2_Chondro
C1qtnf3	2.87891e-177	1.34919	0.978	0.513	0.465	6.48187e-173	2_Chondro
Matn4	1.20248e-176	1.17777	0.976	0.639	0.337	2.70739e-172	2_Chondro
Igf2	1.0058e-175	0.899622	0.92	0.474	0.446	2.26456e-171	2_Chondro
Cnmd	8.9169e-174	1.26281	1	0.615	0.385	2.00764e-169	2_Chondro
C4b	3.63928e-172	1.16267	0.867	0.422	0.445	8.19384e-168	2_Chondro
Col9a1	2.47692e-171	1.23129	1	0.817	0.183	5.57679e-167	2_Chondro
Fbln7	5.34037e-166	0.887619	0.893	0.418	0.475	1.20238e-161	2_Chondro
Sox9	2.55286e-165	1.23019	0.994	0.758	0.236	5.74776e-161	2_Chondro
Sox5	4.64673e-164	0.876727	0.916	0.453	0.463	1.04621e-159	2_Chondro
Serpina3n	2.66793e-163	1.07737	0.685	0.22	0.465	6.00685e-159	2_Chondro
Ccdc80	3.22621e-162	-1.23747	0.572	0.898	-0.326	7.26382e-158	2_Chondro
Tuba1a	9.93882e-162	-1.35572	0.71	0.957	-0.247	2.23772e-157	2_Chondro
Col5a2	9.70557e-159	-2.41509	0.361	0.814	-0.453	2.18521e-154	2_Chondro
Dlk1	1.75202e-157	1.33044	0.725	0.263	0.462	3.94467e-153	2_Chondro
Prelp	3.16259e-153	1.1734	0.965	0.508	0.457	7.12058e-149	2_Chondro
Itm2b	8.8979e-149	-1.29802	0.963	0.988	-0.025	2.00336e-144	2_Chondro
Sdc4	3.23932e-148	0.96329	1	0.893	0.107	7.29332e-144	2_Chondro
Pth1r	5.54764e-146	-1.5009	0.716	0.903	-0.187	1.24905e-141	2_Chondro
Mef2c	7.51309e-144	-1.29961	0.487	0.828	-0.341	1.69157e-139	2_Chondro
Fxyd6	1.65849e-141	0.847351	0.839	0.422	0.417	3.73409e-137	2_Chondro
Edil3	1.94453e-141	0.803434	0.927	0.534	0.393	4.37811e-137	2_Chondro
Tgfbi	2.20755e-140	1.26397	0.956	0.716	0.24	4.97029e-136	2_Chondro
Sox11	4.91257e-140	0.77982	0.764	0.307	0.457	1.10607e-135	2_Chondro
Nrk	8.16864e-140	0.907786	0.976	0.558	0.418	1.83917e-135	2_Chondro
Slc35e3	4.71572e-139	0.738711	0.893	0.513	0.38	1.06174e-134	2_Chondro
Unc5b	5.18037e-138	-0.912134	0.198	0.677	-0.479	1.16636e-133	2_Chondro
Cfh	2.83587e-137	-2.48227	0.079	0.566	-0.487	6.38497e-133	2_Chondro
Rcn2	1.33862e-136	0.677812	0.986	0.88	0.106	3.0139e-132	2_Chondro
Cd9	2.35976e-133	0.8203	1	0.955	0.045	5.313e-129	2_Chondro
Chst11	3.84698e-133	0.888756	0.986	0.652	0.334	8.66147e-129	2_Chondro
Matn3	4.67373e-131	1.12106	0.999	0.676	0.323	1.05229e-126	2_Chondro
S100b	7.09272e-127	0.761195	0.956	0.577	0.379	1.59692e-122	2_Chondro
Rcan1	4.39883e-124	1.62441	0.795	0.487	0.308	9.90396e-120	2_Chondro
Serpine2	7.57678e-124	-3.16724	0.261	0.664	-0.403	1.70591e-119	2_Chondro
Peg3	2.05631e-123	0.897112	0.998	0.771	0.227	4.62978e-119	2_Chondro
Mgp	1.57509e-121	1.67661	0.995	0.752	0.243	3.54632e-117	2_Chondro
Col16a1	1.64841e-121	0.690878	0.99	0.783	0.207	3.71139e-117	2_Chondro
Srxn1	9.53142e-120	1.50856	0.737	0.39	0.347	2.146e-115	2_Chondro
Cd200	9.67841e-120	-0.890808	0.087	0.547	-0.46	2.17909e-115	2_Chondro
Colgalt2	1.18792e-119	0.738428	0.832	0.419	0.413	2.67461e-115	2_Chondro
Cdh11	1.54935e-119	-1.72896	0.086	0.529	-0.443	3.48835e-115	2_Chondro
Col27a1	2.4114e-119	0.892298	1	0.758	0.242	5.42927e-115	2_Chondro
Acan	1.54077e-118	1.06501	1	0.793	0.207	3.46905e-114	2_Chondro
Cdh2	1.553e-118	-1.38406	0.071	0.514	-0.443	3.49659e-114	2_Chondro
Sorbs2	3.57868e-118	0.667925	0.8	0.436	0.364	8.05741e-114	2_Chondro
Lgmn	7.42241e-118	-0.917305	0.547	0.841	-0.294	1.67116e-113	2_Chondro
Csgalnact1	1.00415e-117	0.684088	0.877	0.467	0.41	2.26084e-113	2_Chondro
Wwp2	6.11252e-116	0.634705	0.976	0.686	0.29	1.37623e-111	2_Chondro
Marcks	8.2365e-116	-2.01469	0.263	0.667	-0.404	1.85445e-111	2_Chondro
Sorbs1	1.60671e-115	0.602082	0.745	0.353	0.392	3.61751e-111	2_Chondro
Tspan3	5.46559e-115	0.600803	0.986	0.92	0.066	1.23058e-110	2_Chondro
Phyh	6.96449e-115	0.649567	0.766	0.409	0.357	1.56806e-110	2_Chondro
Smoc1	2.26524e-114	0.525971	0.541	0.164	0.377	5.10018e-110	2_Chondro
Col11a2	1.1857e-111	0.8792	1	0.874	0.126	2.6696e-107	2_Chondro
Fgfrl1	1.52394e-110	0.64444	0.934	0.552	0.382	3.43114e-106	2_Chondro
Cpm	3.55913e-110	0.90925	0.576	0.203	0.373	8.01338e-106	2_Chondro
Pmepa1	1.09206e-108	0.862082	0.984	0.918	0.066	2.45877e-104	2_Chondro
Fkbp9	2.8811e-108	0.580724	0.999	0.953	0.046	6.48679e-104	2_Chondro
Adamts2	1.3121e-107	-1.24109	0.049	0.47	-0.421	2.9542e-103	2_Chondro
P4ha3	3.88368e-107	0.50331	0.667	0.277	0.39	8.74411e-103	2_Chondro
Ptgis	4.50707e-107	-1.03934	0.132	0.553	-0.421	1.01477e-102	2_Chondro
Islr	1.10014e-105	0.614661	0.988	0.773	0.215	2.47696e-101	2_Chondro
Ifitm3	2.35727e-105	-2.13014	0.162	0.559	-0.397	5.30739e-101	2_Chondro
Lgals1	1.18982e-104	-2.32708	0.345	0.694	-0.349	2.67889e-100	2_Chondro
Fap	5.70939e-104	-1.29697	0.105	0.514	-0.409	1.28547e-99	2_Chondro
Thbs1	6.33412e-104	0.932789	0.997	0.802	0.195	1.42613e-99	2_Chondro
Prrx1	2.7411e-103	-1.08878	0.092	0.506	-0.414	6.1716e-99	2_Chondro
Dpysl3	2.11031e-102	-1.21801	0.058	0.469	-0.411	4.75137e-98	2_Chondro
Aes	2.18704e-102	-1.08017	0.114	0.517	-0.403	4.92413e-98	2_Chondro
Tpt1	2.86727e-102	0.316878	1	1	0	6.45567e-98	2_Chondro
Zeb2	3.03503e-102	-1.06686	0.076	0.483	-0.407	6.83336e-98	2_Chondro
Rps26	4.76134e-102	0.476022	0.998	0.997	0.001	1.07202e-97	2_Chondro
Tubb5	4.91742e-102	-1.44938	0.771	0.932	-0.161	1.10716e-97	2_Chondro
Basp1	2.41181e-101	-0.977248	0.064	0.475	-0.411	5.43019e-97	2_Chondro
Ctsz	3.01883e-100	0.783608	0.977	0.946	0.031	6.79689e-96	2_Chondro
Col5a1	3.74491e-100	-1.46516	0.471	0.769	-0.298	8.43167e-96	2_Chondro
Olfml3	6.19155e-100	-1.38293	0.362	0.708	-0.346	1.39403e-95	2_Chondro
Sox6	8.55971e-100	0.549757	0.836	0.482	0.354	1.92722e-95	2_Chondro
Mme	3.88844e-99	-1.1048	0.072	0.474	-0.402	8.75482e-95	2_Chondro
Trabd2b	6.86111e-99	0.437887	0.587	0.215	0.372	1.54478e-94	2_Chondro
Papss2	9.85025e-99	0.729372	0.98	0.637	0.343	2.21778e-94	2_Chondro
Cp	1.06492e-98	-1.35872	0.062	0.458	-0.396	2.39768e-94	2_Chondro
Gfpt2	3.41067e-98	0.601807	0.761	0.395	0.366	7.67913e-94	2_Chondro
Cspg4	4.86167e-96	0.635042	0.985	0.694	0.291	1.0946e-91	2_Chondro
Ibsp	9.39494e-96	-3.86732	0.182	0.552	-0.37	2.11527e-91	2_Chondro
Slit2	9.4257e-96	-0.918941	0.051	0.444	-0.393	2.1222e-91	2_Chondro
Angptl2	1.31096e-95	0.59369	0.874	0.507	0.367	2.95162e-91	2_Chondro
Plod2	2.5697e-94	0.672406	0.998	0.899	0.099	5.78567e-90	2_Chondro
Tmsb4x	2.79864e-94	-2.95928	0.589	0.829	-0.24	6.30114e-90	2_Chondro
Eef1a1	1.44403e-93	0.321676	1	1	0	3.25123e-89	2_Chondro
Slc25a5	7.26591e-93	-0.752101	0.87	0.963	-0.093	1.63592e-88	2_Chondro
Msi2	1.06449e-92	0.576385	0.987	0.757	0.23	2.3967e-88	2_Chondro
Lef1	2.84754e-92	0.477965	0.559	0.208	0.351	6.41124e-88	2_Chondro
Col2a1	4.27953e-92	0.969939	1	0.995	0.005	9.63537e-88	2_Chondro
Ckb	4.9056e-92	-1.31699	0.328	0.669	-0.341	1.1045e-87	2_Chondro
Rps13	1.62576e-90	0.353272	0.997	0.998	-0.001	3.6604e-86	2_Chondro
Atp1a1	2.0347e-90	-0.918608	0.901	0.968	-0.067	4.58113e-86	2_Chondro
Serpinf1	2.57266e-90	-2.24549	0.192	0.564	-0.372	5.79235e-86	2_Chondro
Fam180a	5.93395e-90	0.750165	0.873	0.455	0.418	1.33603e-85	2_Chondro
Rpl36a	7.96756e-90	0.415588	0.997	0.996	0.001	1.7939e-85	2_Chondro
Lox	1.01388e-89	-1.6378	0.12	0.494	-0.374	2.28275e-85	2_Chondro
Bmp1	2.0472e-89	-1.28606	0.546	0.802	-0.256	4.60928e-85	2_Chondro
Hpgd	2.2086e-89	-0.940719	0.049	0.422	-0.373	4.97267e-85	2_Chondro
Xylt1	2.88212e-89	0.621067	0.966	0.543	0.423	6.4891e-85	2_Chondro
Igfbp7	5.47782e-89	0.831286	0.952	0.662	0.29	1.23333e-84	2_Chondro
Rpl23	1.1483e-88	0.330213	0.999	1	-0.001	2.58539e-84	2_Chondro
Sem1	3.00464e-88	-0.576278	0.984	0.995	-0.011	6.76495e-84	2_Chondro
Wif1	8.00883e-88	-1.9136	0.128	0.494	-0.366	1.80319e-83	2_Chondro
Bambi	8.05775e-88	-0.706961	0.194	0.577	-0.383	1.8142e-83	2_Chondro
Ifitm10	5.73614e-87	0.502831	0.545	0.214	0.331	1.29149e-82	2_Chondro
Wls	6.87751e-87	-0.956455	0.454	0.761	-0.307	1.54847e-82	2_Chondro
Gpx3	2.36818e-86	-1.1317	0.106	0.476	-0.37	5.33197e-82	2_Chondro
Rps24	9.12898e-86	0.359698	1	1	0	2.05539e-81	2_Chondro
Rps27a	3.75148e-85	0.302959	1	1	0	8.44645e-81	2_Chondro
Pde3a	1.18293e-84	0.429655	0.604	0.268	0.336	2.66338e-80	2_Chondro
Susd5	3.12081e-84	0.557058	0.957	0.503	0.454	7.0265e-80	2_Chondro
Creb3l2	5.83088e-84	0.582797	0.936	0.685	0.251	1.31282e-79	2_Chondro
Cox6c	1.37974e-83	-0.510011	0.978	0.987	-0.009	3.10649e-79	2_Chondro
Myo10	2.77919e-83	-0.655222	0.236	0.607	-0.371	6.25735e-79	2_Chondro
Dapk2	3.12838e-83	-0.751611	0.033	0.382	-0.349	7.04355e-79	2_Chondro
Vcan	5.20092e-83	-1.6537	0.07	0.425	-0.355	1.17099e-78	2_Chondro
Cd63	5.40897e-83	-0.955878	0.998	0.998	0	1.21783e-78	2_Chondro
Rpl18a	7.46238e-83	0.351271	1	1	0	1.68015e-78	2_Chondro
Spp1	1.20239e-82	-3.88748	0.559	0.793	-0.234	2.70717e-78	2_Chondro
Gpc1	1.24869e-82	-0.707738	0.832	0.942	-0.11	2.81142e-78	2_Chondro
Satb2	7.03738e-82	-0.757895	0.031	0.375	-0.344	1.58447e-77	2_Chondro
Trpv4	8.56721e-82	0.510214	0.886	0.554	0.332	1.92891e-77	2_Chondro
Col11a1	1.33939e-81	0.78584	1	0.972	0.028	3.01564e-77	2_Chondro
Pde4b	2.4244e-81	0.683289	0.696	0.377	0.319	5.45854e-77	2_Chondro
Sox4	3.52715e-81	-1.1169	0.288	0.625	-0.337	7.94137e-77	2_Chondro
Grb14	3.78457e-81	-0.520273	0.088	0.444	-0.356	8.52097e-77	2_Chondro
Lhfp	4.31761e-81	-0.845088	0.099	0.446	-0.347	9.7211e-77	2_Chondro
Rpl26	1.00145e-80	0.378942	0.999	0.998	0.001	2.25476e-76	2_Chondro
Tnc	1.05282e-80	-3.09227	0.214	0.538	-0.324	2.37042e-76	2_Chondro
Xlr3c	1.07666e-80	0.378033	0.453	0.157	0.296	2.4241e-76	2_Chondro
Eno1	1.66906e-80	0.657652	0.966	0.794	0.172	3.75789e-76	2_Chondro
Tpm4	1.70884e-80	-0.756747	0.678	0.863	-0.185	3.84745e-76	2_Chondro
Ctsc	1.99231e-80	-0.957895	0.047	0.388	-0.341	4.48568e-76	2_Chondro
Sdc2	3.6945e-80	-1.16486	0.561	0.816	-0.255	8.31816e-76	2_Chondro
Egr1	3.75559e-80	0.846178	0.978	0.898	0.08	8.45571e-76	2_Chondro
Olfml2b	1.02749e-78	-1.81843	0.112	0.452	-0.34	2.31339e-74	2_Chondro
Rpl12	1.41444e-78	0.372683	0.999	0.997	0.002	3.18462e-74	2_Chondro
Gsn	1.55095e-78	-1.13047	0.545	0.788	-0.243	3.49197e-74	2_Chondro
Rpl22	4.13611e-78	0.390892	0.997	0.996	0.001	9.31245e-74	2_Chondro
Spsb1	1.07951e-77	0.553178	0.669	0.361	0.308	2.43052e-73	2_Chondro
Prnp	1.90452e-77	0.560621	0.861	0.598	0.263	4.28802e-73	2_Chondro
Rps25	3.42175e-77	0.385117	0.999	0.995	0.004	7.70407e-73	2_Chondro
H2-DMa	5.43032e-77	0.702262	0.722	0.384	0.338	1.22264e-72	2_Chondro
Gm43154	7.10613e-77	0.415852	0.563	0.259	0.304	1.59995e-72	2_Chondro
Scube2	1.03387e-76	0.425372	0.47	0.175	0.295	2.32777e-72	2_Chondro
Zfhx4	1.90506e-76	-0.932768	0.097	0.439	-0.342	4.28923e-72	2_Chondro
Pkdcc	3.76071e-76	0.537958	0.9	0.668	0.232	8.46723e-72	2_Chondro
Calm2	6.37685e-76	-0.613384	0.951	0.981	-0.03	1.43575e-71	2_Chondro
Twist1	9.42656e-76	-0.787719	0.079	0.412	-0.333	2.12239e-71	2_Chondro
Hivep3	1.28198e-75	0.761163	0.814	0.542	0.272	2.88639e-71	2_Chondro
Sf3b5	1.692e-75	-0.547511	0.737	0.866	-0.129	3.80953e-71	2_Chondro
Klf6	7.62104e-75	-1.07793	0.42	0.718	-0.298	1.71588e-70	2_Chondro
Ftl1	1.31262e-74	-0.631074	0.995	0.998	-0.003	2.95536e-70	2_Chondro
Zbtb20	2.38162e-74	0.702376	0.978	0.786	0.192	5.36222e-70	2_Chondro
Ap2s1	2.48903e-74	-0.608706	0.426	0.729	-0.303	5.60406e-70	2_Chondro
Wisp3	5.21827e-74	0.343229	0.449	0.167	0.282	1.17489e-69	2_Chondro
S100a1	1.3152e-73	0.536538	0.924	0.7	0.224	2.96118e-69	2_Chondro
Rpl11	1.57306e-73	0.329659	1	1	0	3.54175e-69	2_Chondro
Insig2	5.43245e-73	-0.615813	0.187	0.534	-0.347	1.22312e-68	2_Chondro
Epb41l2	5.724e-73	-0.594494	0.555	0.813	-0.258	1.28876e-68	2_Chondro
Rpl37	7.84986e-73	0.338969	1	0.999	0.001	1.7674e-68	2_Chondro
Snhg6	8.20992e-73	0.489766	0.948	0.785	0.163	1.84846e-68	2_Chondro
Ddah1	9.06588e-73	0.496174	0.673	0.371	0.302	2.04118e-68	2_Chondro
Ncmap	2.09304e-72	0.487932	0.871	0.459	0.412	4.71248e-68	2_Chondro
Slc43a3	2.22135e-72	0.468541	0.801	0.476	0.325	5.00137e-68	2_Chondro
Npm1	8.4382e-72	0.412267	0.997	0.996	0.001	1.89986e-67	2_Chondro
Fibin	8.64211e-72	0.563214	0.912	0.633	0.279	1.94577e-67	2_Chondro
Fabp7	1.94297e-71	0.48422	0.547	0.249	0.298	4.3746e-67	2_Chondro
Igfbp5	5.50521e-71	-2.5361	0.077	0.398	-0.321	1.2395e-66	2_Chondro
Creb3l1	5.6946e-71	-0.868347	0.146	0.478	-0.332	1.28214e-66	2_Chondro
Rpl34	6.01501e-71	0.295605	0.999	0.997	0.002	1.35428e-66	2_Chondro
St3gal4	6.11292e-71	0.454633	0.718	0.438	0.28	1.37632e-66	2_Chondro
Rps3a1	6.13866e-71	0.29277	0.999	1	-0.001	1.38212e-66	2_Chondro
Gnb2	6.81003e-71	-0.553192	0.924	0.972	-0.048	1.53328e-66	2_Chondro
Cd47	2.88304e-70	-0.558842	0.569	0.813	-0.244	6.49115e-66	2_Chondro
Tuba1b	4.56051e-70	-1.02305	0.705	0.877	-0.172	1.0268e-65	2_Chondro
Ubc	6.03771e-70	-0.586926	0.99	0.996	-0.006	1.35939e-65	2_Chondro
Bpifb1	6.32471e-70	0.516965	0.369	0.115	0.254	1.42401e-65	2_Chondro
Msmo1	6.73338e-70	0.639358	0.864	0.561	0.303	1.51602e-65	2_Chondro
Col15a1	1.51906e-69	0.448469	0.579	0.283	0.296	3.42017e-65	2_Chondro
Crispld2	1.7761e-69	0.417264	0.496	0.206	0.29	3.99889e-65	2_Chondro
Pebp1	1.89879e-69	0.390547	0.992	0.964	0.028	4.27513e-65	2_Chondro
Mxd4	3.15511e-69	-0.70882	0.618	0.84	-0.222	7.10374e-65	2_Chondro
Cfl1	3.46142e-69	-0.727106	0.935	0.974	-0.039	7.79338e-65	2_Chondro
Rflna	5.40431e-69	0.478762	0.707	0.381	0.326	1.21678e-64	2_Chondro
Pla2g7	8.64289e-69	0.280485	0.291	0.064	0.227	1.94595e-64	2_Chondro
Rpl9	1.46637e-68	0.292572	1	0.999	0.001	3.30154e-64	2_Chondro
Mpzl2	1.58374e-68	0.37633	0.397	0.137	0.26	3.56579e-64	2_Chondro
F3	3.50658e-68	1.01032	0.437	0.173	0.264	7.89506e-64	2_Chondro
Mmp13	4.11653e-68	-3.49837	0.162	0.471	-0.309	9.26837e-64	2_Chondro
Rps7	5.73418e-68	0.315476	0.999	0.997	0.002	1.29105e-63	2_Chondro
Mfge8	6.74174e-68	0.741064	0.965	0.843	0.122	1.5179e-63	2_Chondro
Rpl35a	8.09851e-68	0.321088	1	0.998	0.002	1.82338e-63	2_Chondro
Rpl32	9.0184e-68	0.343294	0.998	1	-0.002	2.03049e-63	2_Chondro
Scand1	1.34524e-67	-0.529349	0.74	0.904	-0.164	3.02882e-63	2_Chondro
S1pr3	1.41654e-67	-0.71198	0.054	0.359	-0.305	3.18935e-63	2_Chondro
Gnas	1.81386e-67	0.332141	0.999	0.998	0.001	4.08391e-63	2_Chondro
Pfn1	1.84469e-67	-0.58941	0.927	0.979	-0.052	4.15331e-63	2_Chondro
Nrp2	2.13266e-67	-1.10313	0.151	0.46	-0.309	4.80168e-63	2_Chondro
Dusp14	4.51083e-67	0.65166	0.47	0.201	0.269	1.01561e-62	2_Chondro
Tsc22d1	4.81391e-67	0.648973	0.981	0.93	0.051	1.08385e-62	2_Chondro
Jpt1	5.67953e-67	-0.596828	0.467	0.741	-0.274	1.27875e-62	2_Chondro
Plagl1	1.3859e-66	0.582229	0.983	0.847	0.136	3.12036e-62	2_Chondro
B2m	2.29557e-66	-1.17978	0.519	0.728	-0.209	5.16848e-62	2_Chondro
Slit3	3.05645e-66	-0.577336	0.07	0.372	-0.302	6.8816e-62	2_Chondro
Cnn2	9.61554e-66	-1.1166	0.32	0.592	-0.272	2.16494e-61	2_Chondro
Eef1b2	2.50998e-65	0.33478	0.999	0.996	0.003	5.65122e-61	2_Chondro
Cd109	3.99301e-65	0.469273	0.878	0.624	0.254	8.99026e-61	2_Chondro
Gja1	7.63035e-65	-1.57491	0.555	0.726	-0.171	1.71797e-60	2_Chondro
Fuca2	9.9622e-65	0.553009	0.774	0.512	0.262	2.24299e-60	2_Chondro
Cks2	1.29606e-64	-0.993796	0.335	0.623	-0.288	2.91807e-60	2_Chondro
Tnfrsf12a	1.46451e-64	0.777244	0.839	0.641	0.198	3.29735e-60	2_Chondro
Mirg	2.50591e-64	0.613953	0.383	0.131	0.252	5.64205e-60	2_Chondro
Cd1d1	3.34988e-64	-0.51021	0.033	0.319	-0.286	7.54226e-60	2_Chondro
C1qtnf4	3.64158e-64	0.397295	0.71	0.395	0.315	8.19902e-60	2_Chondro
Ppic	5.80259e-64	-0.601782	0.952	0.977	-0.025	1.30645e-59	2_Chondro
Sh3pxd2b	2.35305e-63	-0.616698	0.176	0.474	-0.298	5.2979e-59	2_Chondro
Nfatc1	2.7319e-63	0.655491	0.787	0.549	0.238	6.15087e-59	2_Chondro
Ptprd	3.43201e-63	-1.17622	0.371	0.618	-0.247	7.72717e-59	2_Chondro
Mmp23	3.9035e-63	-0.643473	0.136	0.436	-0.3	8.78872e-59	2_Chondro
Nudt4	4.99824e-63	-1.02301	0.442	0.703	-0.261	1.12535e-58	2_Chondro
Myo1b	5.80949e-63	-0.593608	0.115	0.411	-0.296	1.30801e-58	2_Chondro
Rpl3	5.94594e-63	0.299248	1	1	0	1.33873e-58	2_Chondro
Tmem119	8.38225e-63	-0.678787	0.044	0.335	-0.291	1.88726e-58	2_Chondro
Adamts9	2.08878e-62	-0.692821	0.192	0.496	-0.304	4.70289e-58	2_Chondro
Ninj1	2.50172e-62	0.444613	0.577	0.303	0.274	5.63263e-58	2_Chondro
Rps5	5.30937e-62	0.318051	1	0.999	0.001	1.1954e-57	2_Chondro
Tmem176b	5.63275e-62	-1.10137	0.73	0.87	-0.14	1.26821e-57	2_Chondro
Xlr3b	5.85036e-62	0.22373	0.269	0.062	0.207	1.31721e-57	2_Chondro
Gxylt2	6.52909e-62	-0.666227	0.263	0.556	-0.293	1.47002e-57	2_Chondro
Grb10	7.00303e-62	0.438206	0.971	0.873	0.098	1.57673e-57	2_Chondro
Parp8	7.25892e-62	0.294757	0.439	0.172	0.267	1.63435e-57	2_Chondro
Kctd12	7.51489e-62	-0.992815	0.199	0.501	-0.302	1.69198e-57	2_Chondro
Myl6	8.78958e-62	-0.62136	0.99	0.993	-0.003	1.97897e-57	2_Chondro
Smim3	1.35617e-61	0.463058	0.587	0.311	0.276	3.05341e-57	2_Chondro
Palld	1.47736e-61	-0.668559	0.234	0.554	-0.32	3.32628e-57	2_Chondro
M1ap	1.93338e-61	0.757557	0.551	0.274	0.277	4.35302e-57	2_Chondro
Bhlhe41	3.02592e-61	0.473075	0.519	0.252	0.267	6.81286e-57	2_Chondro
Irx3	3.86381e-61	-0.509384	0.076	0.372	-0.296	8.69936e-57	2_Chondro
Postn	6.27728e-61	-1.48642	0.061	0.344	-0.283	1.41333e-56	2_Chondro
Sparcl1	6.53831e-61	0.463269	0.634	0.339	0.295	1.4721e-56	2_Chondro
Adam10	9.21146e-61	-0.467533	0.142	0.452	-0.31	2.07396e-56	2_Chondro
Slc35f1	1.40924e-60	0.286971	0.431	0.174	0.257	3.17291e-56	2_Chondro
Pard6g	2.02452e-60	-0.580385	0.12	0.411	-0.291	4.5582e-56	2_Chondro
Rpl13	2.17604e-60	0.276725	1	1	0	4.89936e-56	2_Chondro
Col12a1	2.31479e-60	-1.24967	0.648	0.828	-0.18	5.21175e-56	2_Chondro
Tmbim6	2.52423e-60	-0.509617	0.803	0.922	-0.119	5.6833e-56	2_Chondro
Rpl36	3.76135e-60	0.305016	0.997	0.998	-0.001	8.46867e-56	2_Chondro
Gfod1	1.79636e-59	0.412828	0.573	0.301	0.272	4.0445e-55	2_Chondro
Bicc1	1.9625e-59	-0.764846	0.43	0.693	-0.263	4.41857e-55	2_Chondro
Atf4	2.56071e-59	0.431225	0.998	0.975	0.023	5.76544e-55	2_Chondro
Rps29	2.73448e-59	0.246795	0.999	0.998	0.001	6.15668e-55	2_Chondro
Rbms1	5.03514e-59	-0.64092	0.342	0.647	-0.305	1.13366e-54	2_Chondro
Eef1g	6.32743e-59	0.368155	0.994	0.988	0.006	1.42462e-54	2_Chondro
Rtl3	8.63853e-59	0.488651	0.673	0.368	0.305	1.94497e-54	2_Chondro
Ptch1	1.07022e-58	0.570021	0.841	0.606	0.235	2.40961e-54	2_Chondro
Sema5a	1.52527e-58	-0.498249	0.078	0.367	-0.289	3.43415e-54	2_Chondro
Igfbp4	1.63617e-58	-2.35026	0.274	0.54	-0.266	3.68383e-54	2_Chondro
Rpl17	1.7911e-58	0.314342	0.997	0.996	0.001	4.03267e-54	2_Chondro
Rai14	2.62598e-58	-0.600169	0.146	0.439	-0.293	5.9124e-54	2_Chondro
Smoc2	3.67896e-58	0.552312	0.986	0.629	0.357	8.28317e-54	2_Chondro
Cxcl12	4.11556e-58	-3.22464	0.075	0.351	-0.276	9.26618e-54	2_Chondro
Pdrg1	7.62263e-58	0.442811	0.892	0.656	0.236	1.71623e-53	2_Chondro
Luc7l2	7.98676e-58	0.45394	0.991	0.927	0.064	1.79822e-53	2_Chondro
Mxra8	8.71479e-58	-0.80231	0.29	0.558	-0.268	1.96214e-53	2_Chondro
Csf1	1.33247e-57	-0.799769	0.094	0.374	-0.28	3.00006e-53	2_Chondro
Serpina3c	1.54192e-57	0.242814	0.213	0.038	0.175	3.47163e-53	2_Chondro
Podxl2	1.72748e-57	-0.419646	0.059	0.335	-0.276	3.88942e-53	2_Chondro
Rps3	1.77368e-57	0.279954	1	0.999	0.001	3.99343e-53	2_Chondro
Rps18	2.75275e-57	0.301964	0.999	0.999	0	6.19781e-53	2_Chondro
1700025G04Rik	2.78393e-57	0.451063	0.839	0.598	0.241	6.26802e-53	2_Chondro
Rps14	3.69551e-57	0.268112	1	1	0	8.32045e-53	2_Chondro
Micall2	3.96e-57	0.296905	0.397	0.151	0.246	8.91593e-53	2_Chondro
Capn6	4.267e-57	0.442324	0.935	0.639	0.296	9.60715e-53	2_Chondro
Antxr1	5.46571e-57	-0.81822	0.192	0.474	-0.282	1.2306e-52	2_Chondro
Sfrp5	5.74684e-57	0.777758	0.471	0.208	0.263	1.2939e-52	2_Chondro
H2-DMb1	7.38334e-57	0.626483	0.718	0.423	0.295	1.66236e-52	2_Chondro
Elovl6	8.57593e-57	0.442157	0.702	0.456	0.246	1.93087e-52	2_Chondro
Map4k4	1.77444e-56	-0.747754	0.641	0.835	-0.194	3.99515e-52	2_Chondro
Rps10	2.0209e-56	0.273055	1	0.999	0.001	4.55005e-52	2_Chondro
Tmem176a	2.20039e-56	-0.943773	0.78	0.876	-0.096	4.95418e-52	2_Chondro
Rpl4	2.43108e-56	0.313689	0.998	0.994	0.004	5.47359e-52	2_Chondro
Chd4	3.43689e-56	-0.509422	0.69	0.868	-0.178	7.73816e-52	2_Chondro
Ramp1	4.00982e-56	-0.705101	0.076	0.351	-0.275	9.02812e-52	2_Chondro
Pdcd4	7.35802e-56	0.453917	0.875	0.73	0.145	1.65666e-51	2_Chondro
Rps4x	1.5906e-55	0.275824	1	0.999	0.001	3.58124e-51	2_Chondro
Tmod3	1.69639e-55	-0.614957	0.305	0.594	-0.289	3.81941e-51	2_Chondro
Efna5	1.95867e-55	-0.576509	0.044	0.307	-0.263	4.40995e-51	2_Chondro
Sp7	2.37127e-55	-0.435087	0.226	0.523	-0.297	5.33891e-51	2_Chondro
Col1a2	2.52917e-55	-3.41505	0.995	0.995	0	5.69443e-51	2_Chondro
2310022B05Rik	4.56755e-55	-0.509997	0.434	0.685	-0.251	1.02838e-50	2_Chondro
Synpo	5.1046e-55	0.417291	0.69	0.429	0.261	1.1493e-50	2_Chondro
Lmo4	7.53307e-55	-0.55339	0.506	0.769	-0.263	1.69607e-50	2_Chondro
Pdlim5	9.06274e-55	-0.445622	0.146	0.439	-0.293	2.04048e-50	2_Chondro
Nav3	1.0357e-54	-0.553719	0.026	0.278	-0.252	2.33189e-50	2_Chondro
Cpne8	1.10094e-54	0.371287	0.736	0.442	0.294	2.47877e-50	2_Chondro
Pdgfrb	1.36772e-54	-0.976155	0.073	0.339	-0.266	3.07942e-50	2_Chondro
Ddah2	1.52436e-54	-0.523248	0.059	0.325	-0.266	3.43209e-50	2_Chondro
Sgms2	2.17228e-54	-1.29208	0.574	0.753	-0.179	4.89088e-50	2_Chondro
Rasgrp2	4.77702e-54	-0.607041	0.049	0.306	-0.257	1.07555e-49	2_Chondro
4930523C07Rik	4.80837e-54	0.524782	0.753	0.478	0.275	1.08261e-49	2_Chondro
Ezr	5.09265e-54	0.492955	0.604	0.346	0.258	1.14661e-49	2_Chondro
Col13a1	5.80479e-54	-0.585848	0.024	0.274	-0.25	1.30695e-49	2_Chondro
Fat1	6.7537e-54	-0.695761	0.601	0.812	-0.211	1.5206e-49	2_Chondro
Ndn	1.01404e-53	0.442365	0.838	0.612	0.226	2.28311e-49	2_Chondro
Rsrp1	1.22645e-53	-0.698637	0.604	0.826	-0.222	2.76134e-49	2_Chondro
Snta1	1.51138e-53	-0.316893	0.114	0.403	-0.289	3.40288e-49	2_Chondro
Xlr3a	1.66891e-53	0.211816	0.237	0.055	0.182	3.75755e-49	2_Chondro
P3h4	1.85998e-53	0.39674	0.978	0.831	0.147	4.18773e-49	2_Chondro
Sobp	1.87959e-53	0.42505	0.825	0.555	0.27	4.2319e-49	2_Chondro
Gas1	2.89466e-53	-1.00917	0.163	0.43	-0.267	6.51732e-49	2_Chondro
Efcab1	3.44774e-53	0.388362	0.601	0.348	0.253	7.76258e-49	2_Chondro
Col1a1	3.47702e-53	-3.94932	0.901	0.96	-0.059	7.82852e-49	2_Chondro
Mbnl2	3.89412e-53	0.453947	0.978	0.884	0.094	8.76762e-49	2_Chondro
Rpl18	4.90173e-53	0.259319	1	1	0	1.10362e-48	2_Chondro
Tiam2	8.27867e-53	0.469516	0.853	0.62	0.233	1.86394e-48	2_Chondro
Rplp2	1.10934e-52	0.236579	0.998	0.999	-0.001	2.49768e-48	2_Chondro
Epdr1	1.41264e-52	-0.53561	0.197	0.476	-0.279	3.18055e-48	2_Chondro
Slc16a4	2.99373e-52	0.257515	0.326	0.113	0.213	6.74039e-48	2_Chondro
Abracl	3.23085e-52	-0.655486	0.454	0.683	-0.229	7.27425e-48	2_Chondro
3110079O15Rik	3.32614e-52	0.746394	1	0.776	0.224	7.48881e-48	2_Chondro
Lamp1	4.22051e-52	-0.478126	0.925	0.972	-0.047	9.50247e-48	2_Chondro
Crispld1	4.52266e-52	0.37518	0.714	0.408	0.306	1.01828e-47	2_Chondro
Herpud1	6.32353e-52	0.502937	0.925	0.738	0.187	1.42374e-47	2_Chondro
Stox2	6.39958e-52	-0.483365	0.069	0.326	-0.257	1.44087e-47	2_Chondro
Iscu	1.2127e-51	-0.404079	0.305	0.594	-0.289	2.73039e-47	2_Chondro
Podnl1	1.29075e-51	-0.624665	0.04	0.283	-0.243	2.90612e-47	2_Chondro
Rasl11a	1.34858e-51	-0.781177	0.084	0.343	-0.259	3.03633e-47	2_Chondro
Tpm2	1.82929e-51	-1.10786	0.156	0.418	-0.262	4.11864e-47	2_Chondro
A2m	1.93085e-51	0.458031	0.558	0.291	0.267	4.34731e-47	2_Chondro
Ccdc12	2.21526e-51	-0.552929	0.413	0.665	-0.252	4.98765e-47	2_Chondro
Slc36a2	2.86578e-51	-0.550503	0.024	0.262	-0.238	6.45231e-47	2_Chondro
Hif1a	4.99074e-51	0.492759	0.958	0.813	0.145	1.12367e-46	2_Chondro
Slc38a10	5.00637e-51	-0.488724	0.703	0.82	-0.117	1.12718e-46	2_Chondro
Psme4	6.77735e-51	-0.410333	0.432	0.71	-0.278	1.52592e-46	2_Chondro
Slc35b1	1.00879e-50	-0.415989	0.444	0.686	-0.242	2.27129e-46	2_Chondro
Car3	1.03041e-50	-1.32077	0.026	0.262	-0.236	2.31996e-46	2_Chondro
Cmtm5	1.21663e-50	0.263547	0.392	0.164	0.228	2.73925e-46	2_Chondro
Myh9	1.37924e-50	-0.597783	0.395	0.667	-0.272	3.10537e-46	2_Chondro
Cpe	1.51978e-50	-0.613576	0.953	0.937	0.016	3.42177e-46	2_Chondro
Mmp14	1.56859e-50	-1.37041	0.598	0.765	-0.167	3.53169e-46	2_Chondro
Rpl19	1.6036e-50	0.220604	1	0.999	0.001	3.6105e-46	2_Chondro
Eif1a	1.78117e-50	0.424056	0.906	0.761	0.145	4.0103e-46	2_Chondro
Tnfsf11	1.86371e-50	-0.72418	0.028	0.263	-0.235	4.19614e-46	2_Chondro
Nid2	1.86459e-50	0.441321	0.917	0.574	0.343	4.19813e-46	2_Chondro
Rab27a	1.90207e-50	0.240701	0.239	0.06	0.179	4.28251e-46	2_Chondro
Epas1	2.7971e-50	-0.684691	0.075	0.328	-0.253	6.29767e-46	2_Chondro
Angptl4	3.25046e-50	-0.700208	0.091	0.349	-0.258	7.3184e-46	2_Chondro
Ppfibp2	3.93366e-50	-0.414805	0.03	0.268	-0.238	8.85663e-46	2_Chondro
Manf	5.30448e-50	-0.540146	0.893	0.939	-0.046	1.1943e-45	2_Chondro
Id1	7.64181e-50	0.724313	0.799	0.539	0.26	1.72055e-45	2_Chondro
Igf2r	9.88891e-50	0.408709	0.902	0.74	0.162	2.22649e-45	2_Chondro
Adamts5	1.34893e-49	-0.823248	0.161	0.414	-0.253	3.03711e-45	2_Chondro
Frmd6	1.70728e-49	-0.732358	0.412	0.631	-0.219	3.84395e-45	2_Chondro
Omd	2.36185e-49	-0.565639	0.106	0.378	-0.272	5.3177e-45	2_Chondro
Klf10	4.39734e-49	0.456069	0.763	0.531	0.232	9.9006e-45	2_Chondro
Sfrp4	4.79753e-49	-0.703502	0.026	0.258	-0.232	1.08016e-44	2_Chondro
Bmp7	6.94603e-49	0.341349	0.44	0.21	0.23	1.5639e-44	2_Chondro
Casc4	7.52116e-49	0.382588	0.846	0.636	0.21	1.69339e-44	2_Chondro
Aqp1	8.51547e-49	-0.487563	0.061	0.304	-0.243	1.91726e-44	2_Chondro
Arid5b	1.02765e-48	-0.462149	0.187	0.467	-0.28	2.31376e-44	2_Chondro
Ebp	1.41102e-48	-0.432764	0.384	0.637	-0.253	3.17692e-44	2_Chondro
Mylk	1.91155e-48	-0.520464	0.035	0.268	-0.233	4.30385e-44	2_Chondro
Nop10	2.42433e-48	0.413341	0.932	0.813	0.119	5.45837e-44	2_Chondro
Dok1	2.99221e-48	0.368773	0.622	0.382	0.24	6.73697e-44	2_Chondro
Irx5	3.33414e-48	-0.395931	0.061	0.307	-0.246	7.50681e-44	2_Chondro
Pdgfc	3.90893e-48	-0.349756	0.03	0.26	-0.23	8.80095e-44	2_Chondro
Zfp36l1	3.96284e-48	-0.981253	0.548	0.728	-0.18	8.92233e-44	2_Chondro
Stk17b	4.36355e-48	-0.539496	0.233	0.498	-0.265	9.82452e-44	2_Chondro
Metrnl	5.59258e-48	-0.630254	0.244	0.504	-0.26	1.25917e-43	2_Chondro
Cox4i1	6.55002e-48	-0.315114	0.995	0.996	-0.001	1.47474e-43	2_Chondro
Chil1	7.80262e-48	0.276461	0.262	0.075	0.187	1.75676e-43	2_Chondro
Rpl22l1	9.54156e-48	0.320548	0.998	0.995	0.003	2.14828e-43	2_Chondro
Raph1	1.07097e-47	-0.499119	0.769	0.879	-0.11	2.41129e-43	2_Chondro
Pls3	1.2767e-47	-0.438498	0.283	0.545	-0.262	2.8745e-43	2_Chondro
Kdm6b	1.31265e-47	0.673613	0.884	0.758	0.126	2.95543e-43	2_Chondro
Sfrp1	1.32016e-47	0.253352	0.524	0.274	0.25	2.97233e-43	2_Chondro
Uqcrq	1.4926e-47	-0.413469	0.931	0.948	-0.017	3.3606e-43	2_Chondro
Fads3	1.93268e-47	-0.382335	0.254	0.53	-0.276	4.35143e-43	2_Chondro
Iqsec1	2.51939e-47	0.365703	0.627	0.392	0.235	5.67242e-43	2_Chondro
Vcp	3.1186e-47	-0.385591	0.914	0.957	-0.043	7.02152e-43	2_Chondro
Ndufa11	3.15204e-47	-0.408534	0.802	0.889	-0.087	7.09682e-43	2_Chondro
Hmgcs1	3.19154e-47	0.566979	0.901	0.725	0.176	7.18575e-43	2_Chondro
Ssr3	3.81949e-47	-0.360919	0.962	0.972	-0.01	8.59958e-43	2_Chondro
Mdk	4.02232e-47	-1.24559	0.289	0.526	-0.237	9.05625e-43	2_Chondro
Cebpg	5.66812e-47	0.399796	0.661	0.437	0.224	1.27618e-42	2_Chondro
Zmiz1	7.26494e-47	0.357891	0.804	0.584	0.22	1.6357e-42	2_Chondro
Mtch1	7.83708e-47	-0.476348	0.832	0.932	-0.1	1.76452e-42	2_Chondro
Atp5o.1	9.17571e-47	-0.370551	0.942	0.954	-0.012	2.06591e-42	2_Chondro
Rps8	9.59378e-47	0.217095	1	1	0	2.16004e-42	2_Chondro
Picalm	1.0605e-46	-0.46256	0.451	0.712	-0.261	2.38771e-42	2_Chondro
Stk40	1.25374e-46	0.411781	0.702	0.491	0.211	2.8228e-42	2_Chondro
Slc35d1	1.3197e-46	0.397686	0.829	0.547	0.282	2.97131e-42	2_Chondro
Pla2g4a	1.357e-46	-0.34747	0.059	0.298	-0.239	3.05529e-42	2_Chondro
2810474O19Rik	2.81792e-46	-0.54655	0.428	0.694	-0.266	6.34455e-42	2_Chondro
Gng5	3.76497e-46	0.353723	0.991	0.968	0.023	8.47682e-42	2_Chondro
Uaca	3.81192e-46	-0.41809	0.165	0.436	-0.271	8.58253e-42	2_Chondro
Fabp3	3.91359e-46	-0.364354	0.04	0.268	-0.228	8.81144e-42	2_Chondro
Cox8a	4.81168e-46	-0.328686	0.991	0.99	0.001	1.08335e-41	2_Chondro
Ccdc3	6.62212e-46	-0.57274	0.015	0.228	-0.213	1.49097e-41	2_Chondro
Tmem123	8.00329e-46	-0.376332	0.114	0.369	-0.255	1.80194e-41	2_Chondro
Rnaseh2c	8.21652e-46	-0.451027	0.39	0.64	-0.25	1.84995e-41	2_Chondro
Tmem132a	9.80409e-46	-0.361981	0.028	0.247	-0.219	2.20739e-41	2_Chondro
Trps1	1.79211e-45	0.415147	0.948	0.751	0.197	4.03495e-41	2_Chondro
Sdk2	1.80008e-45	0.422836	0.875	0.719	0.156	4.05289e-41	2_Chondro
Tbx2	2.28357e-45	-0.404071	0.035	0.257	-0.222	5.14147e-41	2_Chondro
Atp5l	2.56332e-45	-0.345149	0.98	0.988	-0.008	5.77131e-41	2_Chondro
Antxr2	2.86889e-45	-0.344167	0.141	0.399	-0.258	6.4593e-41	2_Chondro
Tomm20	2.89731e-45	0.329899	0.991	0.958	0.033	6.5233e-41	2_Chondro
Ptpn13	2.90629e-45	-0.389321	0.076	0.311	-0.235	6.54352e-41	2_Chondro
Slc41a1	2.92977e-45	0.4001	0.607	0.394	0.213	6.59638e-41	2_Chondro
Ndufa4	3.3191e-45	-0.514698	0.901	0.968	-0.067	7.47296e-41	2_Chondro
Rplp1	3.38966e-45	0.230824	1	1	0	7.63181e-41	2_Chondro
Ptprs	5.134e-45	-0.812951	0.6	0.744	-0.144	1.15592e-40	2_Chondro
Cda	5.15799e-45	0.27408	0.348	0.147	0.201	1.16132e-40	2_Chondro
Ikzf4	5.17642e-45	0.288787	0.374	0.158	0.216	1.16547e-40	2_Chondro
Tnfrsf19	7.24553e-45	-0.409249	0.023	0.237	-0.214	1.63133e-40	2_Chondro
Ndufa4l2	8.30924e-45	0.667435	0.818	0.566	0.252	1.87082e-40	2_Chondro
Sec11c	9.03731e-45	-0.445263	0.43	0.667	-0.237	2.03475e-40	2_Chondro
Nfat5	1.06435e-44	0.451108	0.955	0.823	0.132	2.39639e-40	2_Chondro
Notch3	1.34144e-44	-0.533245	0.021	0.232	-0.211	3.02024e-40	2_Chondro
Htra1	1.34829e-44	-0.520182	0.416	0.665	-0.249	3.03568e-40	2_Chondro
Vldlr	1.60586e-44	-0.413119	0.254	0.522	-0.268	3.6156e-40	2_Chondro
H2-D1	1.72795e-44	-0.779871	0.31	0.56	-0.25	3.89048e-40	2_Chondro
Lingo1	2.17622e-44	0.230274	0.341	0.135	0.206	4.89976e-40	2_Chondro
Cox5a	3.71393e-44	-0.371084	0.924	0.953	-0.029	8.3619e-40	2_Chondro
Pdgfra	5.85493e-44	-0.426065	0.079	0.311	-0.232	1.31824e-39	2_Chondro
Ppp1ca	7.14693e-44	-0.401345	0.886	0.951	-0.065	1.60913e-39	2_Chondro
St6galnac4	7.1564e-44	-0.414774	0.159	0.409	-0.25	1.61126e-39	2_Chondro
Bmp2k	1.32177e-43	-0.420452	0.154	0.396	-0.242	2.97598e-39	2_Chondro
Tead2	1.86544e-43	-0.401256	0.077	0.306	-0.229	4.20005e-39	2_Chondro
Zfp91	1.96412e-43	-0.404244	0.69	0.853	-0.163	4.42222e-39	2_Chondro
B830012L14Rik	2.25922e-43	0.39311	0.225	0.06	0.165	5.08664e-39	2_Chondro
Cdh15	2.27512e-43	-0.454336	0.021	0.228	-0.207	5.12243e-39	2_Chondro
Gdf10	2.40526e-43	0.519773	0.719	0.454	0.265	5.41544e-39	2_Chondro
Cdv3	2.49818e-43	-0.381433	0.851	0.895	-0.044	5.62464e-39	2_Chondro
Rps15	3.82986e-43	0.251652	0.998	1	-0.002	8.62294e-39	2_Chondro
Ifitm5	4.20294e-43	-1.25395	0.031	0.241	-0.21	9.46291e-39	2_Chondro
Fam46a	4.45761e-43	-0.697299	0.494	0.717	-0.223	1.00363e-38	2_Chondro
Pdlim2	8.12232e-43	-0.436403	0.066	0.291	-0.225	1.82874e-38	2_Chondro
Lepr	8.71476e-43	-0.679957	0.024	0.231	-0.207	1.96213e-38	2_Chondro
Dap	8.94563e-43	-0.443259	0.932	0.927	0.005	2.01411e-38	2_Chondro
Vps37b	9.33473e-43	0.383056	0.659	0.426	0.233	2.10171e-38	2_Chondro
Idi1	1.30385e-42	0.447296	0.804	0.553	0.251	2.93562e-38	2_Chondro
Rpl10a	1.47032e-42	0.244096	1	0.998	0.002	3.31043e-38	2_Chondro
Comp	1.81805e-42	0.296991	0.999	0.785	0.214	4.09335e-38	2_Chondro
Cdr2l	1.98967e-42	-0.376906	0.159	0.411	-0.252	4.47974e-38	2_Chondro
Cul1	2.22418e-42	-0.434082	0.573	0.778	-0.205	5.00775e-38	2_Chondro
Rps23	2.49415e-42	0.238472	1	0.998	0.002	5.61557e-38	2_Chondro
Ifngr1	2.93983e-42	-0.398182	0.231	0.48	-0.249	6.61902e-38	2_Chondro
Rcn1	3.09062e-42	0.351381	0.991	0.923	0.068	6.95853e-38	2_Chondro
Cmtm3	3.16874e-42	-0.459936	0.063	0.281	-0.218	7.13442e-38	2_Chondro
Flna	3.59407e-42	-0.702923	0.402	0.626	-0.224	8.09204e-38	2_Chondro
Unc5c	3.96342e-42	0.350605	0.78	0.572	0.208	8.92365e-38	2_Chondro
Thbs2	4.00839e-42	-0.534368	0.155	0.398	-0.243	9.02488e-38	2_Chondro
Cltc	4.05782e-42	-0.384662	0.746	0.861	-0.115	9.13619e-38	2_Chondro
Ugdh	4.44132e-42	0.460339	0.96	0.844	0.116	9.99962e-38	2_Chondro
Rbp1	5.97268e-42	-0.51669	0.066	0.284	-0.218	1.34475e-37	2_Chondro
Me2	8.234e-42	-0.309993	0.128	0.373	-0.245	1.85388e-37	2_Chondro
Rps6	9.82755e-42	0.260354	0.998	0.997	0.001	2.21267e-37	2_Chondro
Enpp6	9.84846e-42	-0.339339	0.015	0.211	-0.196	2.21738e-37	2_Chondro
Foxa3	1.56355e-41	0.322087	0.537	0.3	0.237	3.52034e-37	2_Chondro
Zfp385b	1.88928e-41	0.308385	0.643	0.395	0.248	4.25371e-37	2_Chondro
Slc26a2	2.26135e-41	0.387773	0.896	0.646	0.25	5.09144e-37	2_Chondro
Fbn1	2.77598e-41	-1.26433	0.132	0.359	-0.227	6.25012e-37	2_Chondro
Rpl28	3.65963e-41	0.246153	1	1	0	8.23967e-37	2_Chondro
Plxna2	5.18474e-41	-0.685315	0.092	0.313	-0.221	1.16734e-36	2_Chondro
Vstm4	6.43007e-41	-0.35386	0.024	0.223	-0.199	1.44773e-36	2_Chondro
Cd302	8.0642e-41	-0.610365	0.505	0.713	-0.208	1.81565e-36	2_Chondro
Prcp	8.6361e-41	-0.506694	0.166	0.391	-0.225	1.94442e-36	2_Chondro
Rpl39	9.24159e-41	0.222214	0.997	0.997	0	2.08074e-36	2_Chondro
Rps27	9.37009e-41	0.210429	0.998	0.997	0.001	2.10968e-36	2_Chondro
Zfand5	9.53788e-41	-0.550795	0.882	0.93	-0.048	2.14745e-36	2_Chondro
Tgfb1	1.18065e-40	-0.460475	0.489	0.709	-0.22	2.65824e-36	2_Chondro
Slc25a10	1.44445e-40	-0.242257	0.105	0.341	-0.236	3.25217e-36	2_Chondro
Loxl3	1.93717e-40	0.361011	0.8	0.576	0.224	4.36154e-36	2_Chondro
Dync1h1	1.99288e-40	-0.406314	0.541	0.755	-0.214	4.48696e-36	2_Chondro
Rlbp1	2.01418e-40	0.233548	0.368	0.171	0.197	4.53493e-36	2_Chondro
Mthfd2	2.08509e-40	0.382895	0.85	0.624	0.226	4.69459e-36	2_Chondro
Fam129a	2.13548e-40	-0.326024	0.05	0.263	-0.213	4.80804e-36	2_Chondro
Sema6d	2.64554e-40	-0.373392	0.063	0.278	-0.215	5.95643e-36	2_Chondro
Hmga2	3.18659e-40	0.316222	0.277	0.1	0.177	7.1746e-36	2_Chondro
Ndufa1	5.01147e-40	-0.398483	0.8	0.877	-0.077	1.12833e-35	2_Chondro
Aldoa	6.60426e-40	0.371403	0.985	0.888	0.097	1.48695e-35	2_Chondro
Cox6a1	9.48558e-40	-0.385651	0.92	0.936	-0.016	2.13568e-35	2_Chondro
Ugp2	9.57706e-40	-0.574148	0.679	0.764	-0.085	2.15628e-35	2_Chondro
Chad	1.00475e-39	0.329299	0.561	0.315	0.246	2.26219e-35	2_Chondro
Tmtc2	1.0846e-39	-0.275864	0.03	0.229	-0.199	2.44197e-35	2_Chondro
Gsk3b	1.09057e-39	-0.487806	0.61	0.781	-0.171	2.45541e-35	2_Chondro
Rex1bd	1.15674e-39	-0.394501	0.758	0.88	-0.122	2.6044e-35	2_Chondro
Pcdh7	1.26068e-39	-0.247957	0.023	0.218	-0.195	2.83841e-35	2_Chondro
Bglap2	1.32722e-39	-2.65063	0.071	0.288	-0.217	2.98825e-35	2_Chondro
Ltbp1	1.53668e-39	-0.332436	0.034	0.234	-0.2	3.45984e-35	2_Chondro
Pygl	1.70801e-39	0.307268	0.772	0.469	0.303	3.84559e-35	2_Chondro
Clta	1.91886e-39	-0.382415	0.943	0.958	-0.015	4.32032e-35	2_Chondro
Itga1	2.08855e-39	-0.690113	0.343	0.562	-0.219	4.70238e-35	2_Chondro
Itgb1	2.22182e-39	-0.476996	0.924	0.961	-0.037	5.00242e-35	2_Chondro
Rps19	2.25436e-39	0.224376	1	0.997	0.003	5.0757e-35	2_Chondro
Plxnd1	2.63531e-39	-0.457081	0.095	0.316	-0.221	5.9334e-35	2_Chondro
Selenop	4.13131e-39	-0.58541	0.116	0.338	-0.222	9.30165e-35	2_Chondro
Lsp1	4.72623e-39	0.395992	0.611	0.382	0.229	1.06411e-34	2_Chondro
Rps21	5.06413e-39	0.212273	0.998	0.999	-0.001	1.14019e-34	2_Chondro
Hmgn3	5.24366e-39	-0.516342	0.328	0.566	-0.238	1.18061e-34	2_Chondro
Epb41l3	6.69385e-39	-0.249197	0.035	0.236	-0.201	1.50712e-34	2_Chondro
Hmgcr	7.10154e-39	0.404727	0.882	0.651	0.231	1.59891e-34	2_Chondro
Cited2	9.37716e-39	-0.588912	0.305	0.534	-0.229	2.11127e-34	2_Chondro
Fscn1	9.47166e-39	0.367396	0.925	0.806	0.119	2.13254e-34	2_Chondro
Myadm	9.60464e-39	0.453213	0.749	0.577	0.172	2.16249e-34	2_Chondro
Tnnt3	1.00601e-38	0.318387	0.403	0.192	0.211	2.26502e-34	2_Chondro
Eef2	1.03699e-38	0.23884	1	0.998	0.002	2.33479e-34	2_Chondro
Rps16	1.08822e-38	0.207185	0.998	1	-0.002	2.45014e-34	2_Chondro
Rps2	1.34484e-38	0.230308	1	1	0	3.0279e-34	2_Chondro
Cox5b	1.40651e-38	-0.329707	0.937	0.958	-0.021	3.16675e-34	2_Chondro
Zim1	1.48237e-38	0.258785	0.407	0.204	0.203	3.33755e-34	2_Chondro
Ctsl	2.24256e-38	-0.647699	0.718	0.824	-0.106	5.04913e-34	2_Chondro
Hbegf	2.57142e-38	0.959036	0.596	0.409	0.187	5.78955e-34	2_Chondro
Kitl	2.63191e-38	-0.759984	0.033	0.226	-0.193	5.92574e-34	2_Chondro
Uxs1	3.01608e-38	0.333901	0.735	0.544	0.191	6.79071e-34	2_Chondro
Rpl7	3.31558e-38	0.242229	1	0.998	0.002	7.46502e-34	2_Chondro
Svil	3.3565e-38	-0.339851	0.076	0.286	-0.21	7.55715e-34	2_Chondro
Nupr1	3.7077e-38	-1.16061	0.574	0.723	-0.149	8.34789e-34	2_Chondro
Rpl5	3.85336e-38	0.237897	0.999	0.996	0.003	8.67583e-34	2_Chondro
Rpl6	4.18294e-38	0.211517	0.999	0.999	0	9.41789e-34	2_Chondro
Mef2a	5.52983e-38	-0.406148	0.561	0.77	-0.209	1.24504e-33	2_Chondro
Hspa8	5.53682e-38	-0.385087	0.997	0.997	0	1.24662e-33	2_Chondro
Gpx4	5.60437e-38	-0.435521	0.952	0.969	-0.017	1.26182e-33	2_Chondro
Nfib	6.39721e-38	-0.565365	0.234	0.454	-0.22	1.44033e-33	2_Chondro
1110008F13Rik	9.78263e-38	-0.379742	0.698	0.814	-0.116	2.20256e-33	2_Chondro
Foxp1	9.89444e-38	-0.551441	0.208	0.438	-0.23	2.22773e-33	2_Chondro
Anxa1	1.13021e-37	-0.792028	0.526	0.711	-0.185	2.54467e-33	2_Chondro
Sox8	1.42075e-37	0.240669	0.453	0.24	0.213	3.19881e-33	2_Chondro
Rps17	1.42363e-37	0.247983	0.998	0.993	0.005	3.2053e-33	2_Chondro
Paics	1.72362e-37	0.317853	0.912	0.65	0.262	3.88074e-33	2_Chondro
Lrp8	1.79645e-37	0.309417	0.449	0.253	0.196	4.0447e-33	2_Chondro
Sec61a1	1.79942e-37	-0.397056	0.871	0.916	-0.045	4.05139e-33	2_Chondro
Tmbim1	2.7778e-37	0.355121	0.75	0.546	0.204	6.25423e-33	2_Chondro
Hp	3.72485e-37	-1.15366	0.066	0.267	-0.201	8.38651e-33	2_Chondro
Rack1	4.54858e-37	0.226705	0.999	1	-0.001	1.02411e-32	2_Chondro
Kazald1	4.58564e-37	-0.949844	0.277	0.46	-0.183	1.03246e-32	2_Chondro
Trim47	4.662e-37	0.361905	0.688	0.459	0.229	1.04965e-32	2_Chondro
Adam12	4.76684e-37	-0.475165	0.192	0.413	-0.221	1.07325e-32	2_Chondro
Qsox1	4.99119e-37	-0.839165	0.52	0.701	-0.181	1.12377e-32	2_Chondro
Pdk4	5.96246e-37	-0.329043	0.035	0.224	-0.189	1.34245e-32	2_Chondro
Aff3	6.34341e-37	0.252625	0.513	0.291	0.222	1.42822e-32	2_Chondro
mt-Nd4l	6.57032e-37	-0.454399	0.887	0.958	-0.071	1.47931e-32	2_Chondro
Srpx2	6.99561e-37	-0.459265	0.192	0.429	-0.237	1.57506e-32	2_Chondro
Bcar3	8.72446e-37	-0.240308	0.058	0.263	-0.205	1.96431e-32	2_Chondro
Hapln1	1.06235e-36	0.281791	1	0.761	0.239	2.39188e-32	2_Chondro
Phex	1.16941e-36	-0.681061	0.026	0.209	-0.183	2.63293e-32	2_Chondro
Rgs3	1.27867e-36	-0.626786	0.637	0.795	-0.158	2.87892e-32	2_Chondro
Pcolce	1.35794e-36	-0.816181	0.927	0.907	0.02	3.05741e-32	2_Chondro
Plet1	1.62463e-36	0.824636	0.235	0.08	0.155	3.65785e-32	2_Chondro
Ptp4a3	1.83611e-36	-0.332288	0.164	0.393	-0.229	4.13401e-32	2_Chondro
Tagln2	3.04161e-36	-0.807552	0.444	0.628	-0.184	6.84819e-32	2_Chondro
Agpat3	3.39366e-36	-0.295191	0.1	0.313	-0.213	7.64082e-32	2_Chondro
Epb41l4aos	3.39693e-36	0.335527	0.704	0.511	0.193	7.64818e-32	2_Chondro
Snai2	3.61058e-36	0.323748	0.583	0.367	0.216	8.12923e-32	2_Chondro
Ywhah	3.66278e-36	0.443325	0.768	0.605	0.163	8.24675e-32	2_Chondro
Chchd2	3.85751e-36	-0.277506	0.993	0.996	-0.003	8.68518e-32	2_Chondro
Psmd8	4.14899e-36	-0.443532	0.782	0.879	-0.097	9.34145e-32	2_Chondro
Pgk1	5.32571e-36	0.443986	0.967	0.852	0.115	1.19908e-31	2_Chondro
Rpl21	5.86786e-36	0.225691	1	0.996	0.004	1.32115e-31	2_Chondro
Dnajb4	5.93555e-36	-0.374923	0.239	0.478	-0.239	1.33639e-31	2_Chondro
Selenom	7.32897e-36	-0.594333	0.877	0.928	-0.051	1.65012e-31	2_Chondro
Myl12b	1.11156e-35	-0.432233	0.441	0.649	-0.208	2.50268e-31	2_Chondro
Prdx1	1.16913e-35	-0.32677	0.986	0.989	-0.003	2.63229e-31	2_Chondro
Mdh2	1.30916e-35	-0.343169	0.834	0.905	-0.071	2.94757e-31	2_Chondro
Pcbp1	1.35429e-35	-0.33131	0.858	0.896	-0.038	3.04918e-31	2_Chondro
Acadl	1.37664e-35	-0.32862	0.268	0.497	-0.229	3.09951e-31	2_Chondro
Nckap5	1.37718e-35	0.251725	0.335	0.157	0.178	3.10072e-31	2_Chondro
Hspb11	1.8684e-35	0.3287	0.853	0.679	0.174	4.2067e-31	2_Chondro
Itpkc	1.91503e-35	0.251833	0.221	0.07	0.151	4.31169e-31	2_Chondro
Tpi1	2.04794e-35	0.389083	0.971	0.877	0.094	4.61094e-31	2_Chondro
Gramd2	2.05867e-35	0.285133	0.655	0.418	0.237	4.63509e-31	2_Chondro
Chac1	2.12142e-35	0.328232	0.478	0.271	0.207	4.77637e-31	2_Chondro
Dennd5b	2.33452e-35	-0.308842	0.069	0.27	-0.201	5.25618e-31	2_Chondro
Ecm1	2.41724e-35	-0.399869	0.051	0.244	-0.193	5.44241e-31	2_Chondro
Kif21a	2.91903e-35	0.317219	0.608	0.42	0.188	6.57219e-31	2_Chondro
Ywhab	3.33444e-35	-0.370344	0.842	0.912	-0.07	7.5075e-31	2_Chondro
Dhrs7	3.7281e-35	-0.309755	0.27	0.513	-0.243	8.39382e-31	2_Chondro
Lifr	3.83189e-35	-0.863098	0.522	0.682	-0.16	8.6275e-31	2_Chondro
Itga9	4.19689e-35	-0.422308	0.027	0.203	-0.176	9.44929e-31	2_Chondro
Rab28	5.16874e-35	0.326843	0.774	0.606	0.168	1.16374e-30	2_Chondro
Hes1	5.39765e-35	0.566473	0.843	0.663	0.18	1.21528e-30	2_Chondro
Snhg12	5.69831e-35	0.342959	0.82	0.668	0.152	1.28297e-30	2_Chondro
Gli1	7.40876e-35	0.203498	0.381	0.182	0.199	1.66808e-30	2_Chondro
Mgst3	7.57825e-35	-0.308219	0.099	0.307	-0.208	1.70624e-30	2_Chondro
Ehd3	1.07159e-34	-0.225829	0.083	0.29	-0.207	2.41269e-30	2_Chondro
Micall1	1.12232e-34	0.443506	0.467	0.28	0.187	2.5269e-30	2_Chondro
Rpl29	1.21543e-34	0.294569	0.995	0.992	0.003	2.73653e-30	2_Chondro
Ano6	1.3596e-34	-0.262626	0.035	0.216	-0.181	3.06114e-30	2_Chondro
Psmd13	1.53324e-34	-0.352764	0.589	0.755	-0.166	3.45208e-30	2_Chondro
St3gal5	2.06843e-34	-0.267984	0.199	0.435	-0.236	4.65708e-30	2_Chondro
Hnrnpdl	2.62858e-34	-0.408429	0.856	0.926	-0.07	5.91824e-30	2_Chondro
Leprot	4.11033e-34	-0.422296	0.428	0.647	-0.219	9.2544e-30	2_Chondro
Gpx1	4.24751e-34	-0.431205	0.735	0.843	-0.108	9.56327e-30	2_Chondro
Srpx	4.26586e-34	0.315463	0.851	0.648	0.203	9.60458e-30	2_Chondro
Map4k3	7.42502e-34	-0.362204	0.215	0.434	-0.219	1.67174e-29	2_Chondro
H2afz	8.40604e-34	-0.735884	0.967	0.98	-0.013	1.89262e-29	2_Chondro
H2-K1	1.02933e-33	-0.589562	0.534	0.687	-0.153	2.31754e-29	2_Chondro
Nradd	1.12506e-33	-0.299999	0.069	0.258	-0.189	2.53307e-29	2_Chondro
Mindy2	1.25863e-33	-0.412033	0.338	0.566	-0.228	2.83381e-29	2_Chondro
Adamts1	1.58228e-33	-0.721463	0.375	0.578	-0.203	3.56251e-29	2_Chondro
Zcchc14	1.78505e-33	-0.456645	0.36	0.57	-0.21	4.01904e-29	2_Chondro
Efhd2	1.85008e-33	0.374609	0.689	0.486	0.203	4.16546e-29	2_Chondro
Cap1	1.94656e-33	-0.325749	0.263	0.495	-0.232	4.38267e-29	2_Chondro
Atp5d	2.3542e-33	-0.31753	0.959	0.98	-0.021	5.30049e-29	2_Chondro
Rpl38	2.38395e-33	0.226075	1	0.997	0.003	5.36747e-29	2_Chondro
Ptbp1	3.32773e-33	-0.375414	0.814	0.896	-0.082	7.49238e-29	2_Chondro
Avpi1	4.05713e-33	-0.356811	0.289	0.506	-0.217	9.13463e-29	2_Chondro
Smap1	4.13162e-33	-0.322343	0.598	0.747	-0.149	9.30233e-29	2_Chondro
Epcam	4.47792e-33	0.323877	0.204	0.065	0.139	1.0082e-28	2_Chondro
Il11ra1	4.72502e-33	0.234784	0.511	0.319	0.192	1.06384e-28	2_Chondro
Ddr1	5.92015e-33	0.25513	0.506	0.315	0.191	1.33292e-28	2_Chondro
Lama4	5.94875e-33	-0.37904	0.168	0.383	-0.215	1.33936e-28	2_Chondro
Tiam1	6.74068e-33	0.241128	0.421	0.239	0.182	1.51766e-28	2_Chondro
Rps15a	9.14228e-33	0.203483	1	0.998	0.002	2.05838e-28	2_Chondro
Fat3	9.95833e-33	-0.379511	0.136	0.343	-0.207	2.24212e-28	2_Chondro
Eif4a1	1.01303e-32	-0.299027	0.995	0.993	0.002	2.28083e-28	2_Chondro
Eif4g2	1.01623e-32	-0.273258	0.991	0.989	0.002	2.28804e-28	2_Chondro
Ndufb7	1.02059e-32	-0.323996	0.821	0.892	-0.071	2.29787e-28	2_Chondro
Tpd52l1	1.11546e-32	0.207209	0.445	0.254	0.191	2.51146e-28	2_Chondro
Vps29	1.17349e-32	-0.317031	0.499	0.697	-0.198	2.6421e-28	2_Chondro
Nptn	1.19674e-32	-0.494788	0.688	0.831	-0.143	2.69445e-28	2_Chondro
Fchsd2	1.20993e-32	0.285701	0.622	0.414	0.208	2.72416e-28	2_Chondro
Loxl1	1.29966e-32	-0.570747	0.1	0.291	-0.191	2.92618e-28	2_Chondro
Fkbp7	1.42552e-32	-0.727352	0.536	0.696	-0.16	3.20956e-28	2_Chondro
Gls	1.46803e-32	0.368396	0.967	0.859	0.108	3.30528e-28	2_Chondro
Gnai1	1.46972e-32	-0.281992	0.1	0.299	-0.199	3.30906e-28	2_Chondro
Nsg1	2.24888e-32	-0.419996	0.086	0.271	-0.185	5.06334e-28	2_Chondro
Aurkaip1	2.31666e-32	-0.341537	0.662	0.802	-0.14	5.21597e-28	2_Chondro
Heyl	2.36273e-32	0.283116	0.451	0.25	0.201	5.31968e-28	2_Chondro
Galnt18	2.52838e-32	0.207498	0.377	0.197	0.18	5.69265e-28	2_Chondro
Foxn3	2.56933e-32	-0.513515	0.467	0.67	-0.203	5.78485e-28	2_Chondro
Elmo1	2.95159e-32	-0.304498	0.086	0.275	-0.189	6.6455e-28	2_Chondro
Barx2	3.79246e-32	0.347104	0.304	0.134	0.17	8.53873e-28	2_Chondro
Tm4sf1	4.11774e-32	-0.551126	0.219	0.422	-0.203	9.2711e-28	2_Chondro
Gm973	4.74641e-32	0.24959	0.377	0.199	0.178	1.06865e-27	2_Chondro
Rhoa	5.37826e-32	-0.273364	0.971	0.972	-0.001	1.21092e-27	2_Chondro
Fkbp2	5.51473e-32	-0.325007	0.57	0.737	-0.167	1.24164e-27	2_Chondro
Clic1	6.31268e-32	-0.401399	0.717	0.84	-0.123	1.4213e-27	2_Chondro
Zfp618	6.33062e-32	-0.263807	0.079	0.273	-0.194	1.42534e-27	2_Chondro
Lamb1	7.90221e-32	-0.4328	0.035	0.203	-0.168	1.77918e-27	2_Chondro
Wbp1l	8.06096e-32	-0.236586	0.119	0.324	-0.205	1.81492e-27	2_Chondro
Hspg2	8.22811e-32	0.274669	1	0.943	0.057	1.85256e-27	2_Chondro
Nbdy	9.17548e-32	0.302667	0.781	0.643	0.138	2.06586e-27	2_Chondro
Pcsk6	1.09652e-31	-0.596413	0.254	0.458	-0.204	2.46882e-27	2_Chondro
Rps6kb1	1.1577e-31	-0.356087	0.541	0.706	-0.165	2.60656e-27	2_Chondro
Psmb5	1.28172e-31	-0.37416	0.853	0.917	-0.064	2.8858e-27	2_Chondro
Tgfbr2	1.33382e-31	0.272182	0.662	0.476	0.186	3.0031e-27	2_Chondro
Chn1	1.35454e-31	-0.259864	0.059	0.239	-0.18	3.04974e-27	2_Chondro
Atp5k	1.38804e-31	-0.326925	0.827	0.887	-0.06	3.12518e-27	2_Chondro
Ndufb8	1.52276e-31	-0.300232	0.914	0.939	-0.025	3.4285e-27	2_Chondro
Rap1b	1.52435e-31	-0.472265	0.719	0.819	-0.1	3.43207e-27	2_Chondro
Ssh2	1.69618e-31	-0.252013	0.054	0.232	-0.178	3.81896e-27	2_Chondro
Psmb3	1.75523e-31	-0.375795	0.877	0.927	-0.05	3.9519e-27	2_Chondro
Mif	2.05196e-31	0.432067	0.97	0.951	0.019	4.61998e-27	2_Chondro
Dazap2	2.63319e-31	-0.324366	0.501	0.694	-0.193	5.92862e-27	2_Chondro
Mlf1	2.92988e-31	0.532622	0.508	0.329	0.179	6.59662e-27	2_Chondro
Cox6b1	3.29912e-31	-0.282855	0.962	0.977	-0.015	7.42796e-27	2_Chondro
Dctn2	3.40657e-31	-0.344617	0.597	0.779	-0.182	7.6699e-27	2_Chondro
Tln1	4.16172e-31	-0.384062	0.551	0.739	-0.188	9.37012e-27	2_Chondro
Anxa11	4.98478e-31	0.308828	0.747	0.521	0.226	1.12232e-26	2_Chondro
Col22a1	5.07713e-31	-0.914113	0.07	0.246	-0.176	1.14312e-26	2_Chondro
Ubn2	5.28734e-31	0.39628	0.815	0.702	0.113	1.19045e-26	2_Chondro
Cgref1	6.28052e-31	-0.764008	0.357	0.534	-0.177	1.41406e-26	2_Chondro
Pgrmc1	6.84392e-31	-0.477229	0.637	0.79	-0.153	1.54091e-26	2_Chondro
Mrpl20	6.95558e-31	-0.301957	0.856	0.9	-0.044	1.56605e-26	2_Chondro
Mrps11	8.04286e-31	-0.246596	0.156	0.366	-0.21	1.81085e-26	2_Chondro
Mmp9	8.61089e-31	-2.11724	0.058	0.232	-0.174	1.93874e-26	2_Chondro
Tnfaip8	8.97359e-31	0.258837	0.446	0.261	0.185	2.0204e-26	2_Chondro
Zfp652	9.68411e-31	-0.282357	0.328	0.539	-0.211	2.18038e-26	2_Chondro
Rnase4	1.06009e-30	-0.316066	0.119	0.312	-0.193	2.38679e-26	2_Chondro
Npc2	1.14173e-30	-0.371635	0.925	0.96	-0.035	2.5706e-26	2_Chondro
2011-09-01	1.5029e-30	-0.596946	0.59	0.753	-0.163	3.38378e-26	2_Chondro
Bglap	1.79485e-30	-3.34991	0.172	0.369	-0.197	4.0411e-26	2_Chondro
Tmem14c	1.8135e-30	-0.339596	0.844	0.911	-0.067	4.08308e-26	2_Chondro
Atp5j	1.93552e-30	-0.272436	0.965	0.97	-0.005	4.35782e-26	2_Chondro
Chst2	2.21241e-30	-0.385794	0.068	0.242	-0.174	4.98124e-26	2_Chondro
Acot1	2.2976e-30	0.23168	0.501	0.311	0.19	5.17305e-26	2_Chondro
Blvrb	2.3537e-30	-0.379749	0.384	0.578	-0.194	5.29936e-26	2_Chondro
C1qtnf6	2.59287e-30	-0.50693	0.637	0.768	-0.131	5.83785e-26	2_Chondro
Ahnak2	2.62956e-30	0.261397	0.293	0.135	0.158	5.92045e-26	2_Chondro
Tfrc	2.63931e-30	0.350846	0.524	0.336	0.188	5.94241e-26	2_Chondro
Rgs2	2.73047e-30	-0.429959	0.108	0.295	-0.187	6.14765e-26	2_Chondro
Hip1	2.95113e-30	-0.336617	0.2	0.406	-0.206	6.64448e-26	2_Chondro
Fkbp10	3.12109e-30	-0.432871	0.987	0.98	0.007	7.02714e-26	2_Chondro
Map9	3.27426e-30	0.259026	0.278	0.124	0.154	7.37199e-26	2_Chondro
Myo1d	3.43207e-30	-0.214178	0.148	0.362	-0.214	7.7273e-26	2_Chondro
Pik3r1	4.09796e-30	-0.473442	0.363	0.565	-0.202	9.22655e-26	2_Chondro
Atp5h	4.22672e-30	-0.27839	0.971	0.986	-0.015	9.51646e-26	2_Chondro
Fmnl3	5.19385e-30	-0.247267	0.084	0.268	-0.184	1.1694e-25	2_Chondro
Tmem59	5.86326e-30	-0.62174	0.977	0.981	-0.004	1.32011e-25	2_Chondro
Pkm	6.13391e-30	0.307784	0.993	0.949	0.044	1.38105e-25	2_Chondro
P3h1	7.98444e-30	0.285389	0.979	0.866	0.113	1.7977e-25	2_Chondro
Mylip	8.1362e-30	-0.263321	0.149	0.355	-0.206	1.83187e-25	2_Chondro
S100a13	8.48516e-30	-0.454587	0.778	0.865	-0.087	1.91043e-25	2_Chondro
Panx3	9.82312e-30	-0.854628	0.444	0.57	-0.126	2.21168e-25	2_Chondro
1810058I24Rik	9.87024e-30	0.260991	0.979	0.894	0.085	2.22228e-25	2_Chondro
Osmr	1.2578e-29	0.328926	0.561	0.376	0.185	2.83194e-25	2_Chondro
H2afj	1.28873e-29	-0.344065	0.759	0.857	-0.098	2.90157e-25	2_Chondro
Anxa7	1.43956e-29	-0.302033	0.382	0.591	-0.209	3.24117e-25	2_Chondro
D8Ertd738e	1.5064e-29	-0.327982	0.786	0.878	-0.092	3.39165e-25	2_Chondro
Atg3	1.65289e-29	-0.311394	0.509	0.677	-0.168	3.72148e-25	2_Chondro
Man2a1	1.68212e-29	-0.388691	0.122	0.311	-0.189	3.78729e-25	2_Chondro
Ap1s2	1.91552e-29	-0.226965	0.086	0.271	-0.185	4.3128e-25	2_Chondro
Ints6l	2.5131e-29	0.262153	0.519	0.328	0.191	5.65823e-25	2_Chondro
Hsd17b7	4.79104e-29	0.352979	0.657	0.486	0.171	1.0787e-24	2_Chondro
Ei24	5.26182e-29	-0.243956	0.246	0.47	-0.224	1.1847e-24	2_Chondro
Rom1	6.5096e-29	-0.219169	0.044	0.208	-0.164	1.46564e-24	2_Chondro
Megf6	6.68195e-29	0.225774	0.373	0.196	0.177	1.50444e-24	2_Chondro
Npas3	7.16293e-29	0.21134	0.333	0.173	0.16	1.61273e-24	2_Chondro
Arf5	7.93257e-29	-0.329268	0.973	0.988	-0.015	1.78602e-24	2_Chondro
Mgat4a	8.31201e-29	0.242896	0.518	0.338	0.18	1.87145e-24	2_Chondro
Rac1	8.95934e-29	-0.284439	0.905	0.928	-0.023	2.0172e-24	2_Chondro
Macf1	9.20448e-29	-0.343875	0.523	0.705	-0.182	2.07239e-24	2_Chondro
Gnb1	9.64822e-29	-0.285825	0.895	0.941	-0.046	2.1723e-24	2_Chondro
Coro1c	9.6983e-29	-0.299597	0.219	0.426	-0.207	2.18357e-24	2_Chondro
Esyt1	1.18627e-28	-0.291145	0.171	0.373	-0.202	2.6709e-24	2_Chondro
Timp3	1.29417e-28	-0.555836	0.434	0.629	-0.195	2.91383e-24	2_Chondro
Plekhh2	1.34331e-28	0.281392	0.501	0.324	0.177	3.02447e-24	2_Chondro
Trim8	1.36135e-28	-0.242651	0.155	0.355	-0.2	3.06508e-24	2_Chondro
Etl4	1.58666e-28	-0.240516	0.069	0.241	-0.172	3.57236e-24	2_Chondro
Sdc3	1.69133e-28	-0.348629	0.832	0.886	-0.054	3.80803e-24	2_Chondro
Fosl1	1.71576e-28	0.281899	0.292	0.139	0.153	3.86304e-24	2_Chondro
Pgam1	1.7243e-28	0.337066	0.97	0.877	0.093	3.88226e-24	2_Chondro
Luc7l3	1.81735e-28	-0.347415	0.426	0.63	-0.204	4.09176e-24	2_Chondro
Khk	2.01073e-28	0.223193	0.332	0.166	0.166	4.52716e-24	2_Chondro
Msn	2.19737e-28	-0.314621	0.587	0.739	-0.152	4.94738e-24	2_Chondro
Park7	2.60535e-28	0.261832	0.965	0.918	0.047	5.86595e-24	2_Chondro
Psmc3	2.67908e-28	-0.290222	0.653	0.82	-0.167	6.03195e-24	2_Chondro
Flnb	2.69648e-28	0.25625	0.683	0.506	0.177	6.07111e-24	2_Chondro
Snx5	3.09599e-28	0.27003	0.746	0.575	0.171	6.97062e-24	2_Chondro
Arhgdia	3.21682e-28	-0.311254	0.824	0.89	-0.066	7.24267e-24	2_Chondro
Tsc22d3	3.51321e-28	-0.366553	0.54	0.736	-0.196	7.90999e-24	2_Chondro
Fam83g	3.51548e-28	0.299352	0.246	0.105	0.141	7.91509e-24	2_Chondro
9530059O14Rik	3.75103e-28	0.272646	0.315	0.158	0.157	8.44544e-24	2_Chondro
Hipk1	3.91462e-28	-0.335743	0.512	0.707	-0.195	8.81377e-24	2_Chondro
Tssc4	4.18207e-28	-0.247239	0.17	0.37	-0.2	9.41594e-24	2_Chondro
Heg1	4.19575e-28	-0.238358	0.083	0.258	-0.175	9.44672e-24	2_Chondro
Nt5e	4.456e-28	0.236308	0.617	0.414	0.203	1.00327e-23	2_Chondro
Anxa3	6.07415e-28	-0.326392	0.126	0.311	-0.185	1.3676e-23	2_Chondro
Sh3bgrl	7.07032e-28	-0.520214	0.582	0.726	-0.144	1.59188e-23	2_Chondro
Fam162a	8.40693e-28	0.33419	0.934	0.792	0.142	1.89282e-23	2_Chondro
Vdac3	8.78023e-28	-0.318604	0.832	0.882	-0.05	1.97687e-23	2_Chondro
2810001G20Rik	8.99778e-28	0.271028	0.562	0.387	0.175	2.02585e-23	2_Chondro
Ndufv1	9.49734e-28	-0.337904	0.478	0.661	-0.183	2.13833e-23	2_Chondro
Maea	1.11337e-27	-0.258527	0.291	0.501	-0.21	2.50675e-23	2_Chondro
Ece1	1.20528e-27	-0.286828	0.091	0.266	-0.175	2.71369e-23	2_Chondro
Ephb2	1.64978e-27	0.266349	0.464	0.303	0.161	3.71448e-23	2_Chondro
Pdia4	1.75077e-27	0.261009	0.894	0.773	0.121	3.94187e-23	2_Chondro
Tram2	1.79019e-27	0.242974	0.511	0.342	0.169	4.03062e-23	2_Chondro
Cyba	1.91209e-27	-0.420169	0.47	0.647	-0.177	4.30508e-23	2_Chondro
Bok	2.03311e-27	-0.333182	0.092	0.265	-0.173	4.57754e-23	2_Chondro
Rpl39l	2.03323e-27	-0.430818	0.173	0.369	-0.196	4.57782e-23	2_Chondro
Ptpn14	2.1411e-27	0.287317	0.593	0.429	0.164	4.82068e-23	2_Chondro
Cyp51	2.16605e-27	0.339782	0.842	0.639	0.203	4.87687e-23	2_Chondro
Cdc42	2.2125e-27	-0.300173	0.959	0.96	-0.001	4.98144e-23	2_Chondro
Dlx5	2.57261e-27	-0.255527	0.183	0.382	-0.199	5.79223e-23	2_Chondro
Itgav	2.73557e-27	-0.447919	0.418	0.61	-0.192	6.15913e-23	2_Chondro
P3h3	3.63381e-27	0.290054	0.922	0.827	0.095	8.18152e-23	2_Chondro
Gpr153	3.89001e-27	-0.34271	0.3	0.497	-0.197	8.75836e-23	2_Chondro
Gadd45b	4.12705e-27	0.381143	0.977	0.942	0.035	9.29204e-23	2_Chondro
Dusp18	4.18999e-27	0.298969	0.46	0.288	0.172	9.43376e-23	2_Chondro
Mdfi	4.30661e-27	0.343522	0.79	0.643	0.147	9.69633e-23	2_Chondro
Ndufs2	4.861e-27	-0.313852	0.743	0.852	-0.109	1.09446e-22	2_Chondro
Atp6v0d1	5.28096e-27	-0.268822	0.467	0.649	-0.182	1.18901e-22	2_Chondro
Adam15	6.66612e-27	-0.205712	0.111	0.294	-0.183	1.50088e-22	2_Chondro
Fbln1	6.69354e-27	-0.601957	0.256	0.433	-0.177	1.50705e-22	2_Chondro
Clic4	6.96681e-27	0.484288	0.937	0.847	0.09	1.56858e-22	2_Chondro
Arpc4	7.03283e-27	-0.333381	0.704	0.821	-0.117	1.58344e-22	2_Chondro
Slc16a2	7.08785e-27	0.229147	0.494	0.316	0.178	1.59583e-22	2_Chondro
Nav1	7.43962e-27	-0.396437	0.25	0.427	-0.177	1.67503e-22	2_Chondro
Mpp6	7.8747e-27	-0.460809	0.736	0.804	-0.068	1.77299e-22	2_Chondro
Uqcrc1	9.41082e-27	-0.324974	0.597	0.759	-0.162	2.11885e-22	2_Chondro
Hspe1	9.46872e-27	0.268493	0.977	0.94	0.037	2.13188e-22	2_Chondro
1500011K16Rik	9.91732e-27	0.244565	0.579	0.405	0.174	2.23288e-22	2_Chondro
Phc2	1.43345e-26	-0.321535	0.296	0.498	-0.202	3.22741e-22	2_Chondro
Igf1	1.5908e-26	-1.39926	0.076	0.23	-0.154	3.58169e-22	2_Chondro
Acaa2	1.60959e-26	-0.545234	0.32	0.491	-0.171	3.62399e-22	2_Chondro
Tacc1	1.66986e-26	-0.32749	0.59	0.721	-0.131	3.75968e-22	2_Chondro
Iah1	1.73819e-26	-0.277934	0.224	0.423	-0.199	3.91354e-22	2_Chondro
Cd82	1.74427e-26	0.252554	0.579	0.418	0.161	3.92722e-22	2_Chondro
Penk	1.81477e-26	0.799977	0.336	0.186	0.15	4.08595e-22	2_Chondro
Cst3	1.86136e-26	-0.451345	0.99	0.991	-0.001	4.19085e-22	2_Chondro
Bex2	2.10401e-26	0.252681	0.211	0.08	0.131	4.73718e-22	2_Chondro
Mrps12	2.23408e-26	-0.252742	0.363	0.561	-0.198	5.03003e-22	2_Chondro
Mprip	2.31608e-26	-0.39276	0.683	0.807	-0.124	5.21465e-22	2_Chondro
Sidt2	2.36831e-26	-0.332194	0.456	0.615	-0.159	5.33225e-22	2_Chondro
Eif4b	2.4006e-26	0.280506	0.92	0.821	0.099	5.40494e-22	2_Chondro
Ackr3	2.76659e-26	0.351818	0.56	0.372	0.188	6.22897e-22	2_Chondro
Cpxm2	2.94639e-26	0.208379	0.333	0.171	0.162	6.6338e-22	2_Chondro
Hsp90b1	2.99657e-26	-0.379088	0.992	0.991	0.001	6.74677e-22	2_Chondro
Rala	3.00105e-26	-0.302677	0.646	0.749	-0.103	6.75685e-22	2_Chondro
Fzd1	3.01963e-26	-0.260699	0.127	0.309	-0.182	6.7987e-22	2_Chondro
Cib1	3.22397e-26	-0.249665	0.332	0.528	-0.196	7.25878e-22	2_Chondro
Reep3	3.31978e-26	-0.379722	0.593	0.752	-0.159	7.47449e-22	2_Chondro
Cacnb3	3.51818e-26	-0.262932	0.112	0.278	-0.166	7.92119e-22	2_Chondro
Tle2	4.94299e-26	-0.36362	0.112	0.279	-0.167	1.11291e-21	2_Chondro
Eva1b	6.34358e-26	0.263704	0.836	0.704	0.132	1.42826e-21	2_Chondro
Cyr61	6.45256e-26	0.509478	0.963	0.896	0.067	1.45279e-21	2_Chondro
Golm1	6.50887e-26	-0.21112	0.052	0.206	-0.154	1.46547e-21	2_Chondro
Phlda3	6.85869e-26	-0.27442	0.109	0.282	-0.173	1.54423e-21	2_Chondro
Gstm1	7.21394e-26	-0.250945	0.086	0.254	-0.168	1.62422e-21	2_Chondro
Atp5b	7.34554e-26	-0.278934	0.977	0.984	-0.007	1.65385e-21	2_Chondro
Actg1	7.74549e-26	-0.402511	0.987	0.987	0	1.7439e-21	2_Chondro
Xpnpep1	7.79975e-26	-0.241249	0.357	0.565	-0.208	1.75611e-21	2_Chondro
Mtss1	8.25258e-26	-0.209655	0.063	0.221	-0.158	1.85807e-21	2_Chondro
Has2	9.07685e-26	0.27179	0.324	0.166	0.158	2.04365e-21	2_Chondro
Gtpbp4	9.39226e-26	0.307045	0.747	0.622	0.125	2.11467e-21	2_Chondro
Sulf1	9.77113e-26	-0.449274	0.097	0.263	-0.166	2.19997e-21	2_Chondro
Btg2	9.93318e-26	0.681175	0.891	0.785	0.106	2.23645e-21	2_Chondro
Lztfl1	1.01964e-25	0.27103	0.631	0.478	0.153	2.29571e-21	2_Chondro
Aldoc	1.05289e-25	0.251659	0.625	0.394	0.231	2.37058e-21	2_Chondro
Carhsp1	1.05564e-25	-0.227482	0.233	0.437	-0.204	2.37678e-21	2_Chondro
Psma7	1.07346e-25	-0.31677	0.908	0.95	-0.042	2.4169e-21	2_Chondro
Atp5g3	1.09465e-25	-0.273484	0.927	0.94	-0.013	2.46462e-21	2_Chondro
Dbn1	1.1806e-25	-0.26136	0.073	0.23	-0.157	2.65812e-21	2_Chondro
Ggt5	1.21075e-25	-0.467228	0.058	0.206	-0.148	2.72601e-21	2_Chondro
Romo1	1.21128e-25	-0.302049	0.804	0.873	-0.069	2.7272e-21	2_Chondro
Raf1	1.22369e-25	-0.304159	0.389	0.582	-0.193	2.75514e-21	2_Chondro
Dock4	1.36471e-25	-0.254829	0.087	0.253	-0.166	3.07264e-21	2_Chondro
Ngf	1.55397e-25	0.312035	0.233	0.095	0.138	3.49877e-21	2_Chondro
Man2a2	1.55963e-25	-0.292401	0.227	0.418	-0.191	3.51152e-21	2_Chondro
Adam17	1.88676e-25	-0.246331	0.206	0.41	-0.204	4.24804e-21	2_Chondro
Cry2	2.08313e-25	0.231136	0.608	0.443	0.165	4.69016e-21	2_Chondro
Ssbp4	2.15199e-25	-0.350903	0.249	0.422	-0.173	4.8452e-21	2_Chondro
Dnajb9	2.29318e-25	-0.415574	0.531	0.689	-0.158	5.16309e-21	2_Chondro
Rgcc	2.383e-25	-0.436817	0.591	0.767	-0.176	5.36531e-21	2_Chondro
Ctsk	2.39233e-25	-0.470785	0.474	0.609	-0.135	5.38633e-21	2_Chondro
Csrp2	2.58255e-25	-0.465668	0.297	0.479	-0.182	5.81462e-21	2_Chondro
Ctsh	2.65099e-25	-0.505194	0.541	0.682	-0.141	5.96871e-21	2_Chondro
Nfil3	3.27105e-25	-0.260407	0.197	0.389	-0.192	7.36476e-21	2_Chondro
Wnt5a	3.3021e-25	-0.224144	0.109	0.281	-0.172	7.43467e-21	2_Chondro
Frzb	3.48962e-25	-0.322917	0.148	0.333	-0.185	7.85688e-21	2_Chondro
Chmp4b	3.50408e-25	-0.302987	0.716	0.817	-0.101	7.88943e-21	2_Chondro
Gps1	3.52895e-25	-0.274286	0.496	0.664	-0.168	7.94543e-21	2_Chondro
Gsr	3.84787e-25	-0.254768	0.418	0.61	-0.192	8.66349e-21	2_Chondro
Pon2	3.88476e-25	-0.247538	0.15	0.332	-0.182	8.74653e-21	2_Chondro
Tcn2	3.9136e-25	-0.323668	0.248	0.433	-0.185	8.81146e-21	2_Chondro
Jund	4.73293e-25	0.410859	0.983	0.974	0.009	1.06562e-20	2_Chondro
Akr1b3	4.86519e-25	-0.348769	0.455	0.622	-0.167	1.0954e-20	2_Chondro
Sap30l	5.1209e-25	-0.258276	0.279	0.473	-0.194	1.15297e-20	2_Chondro
Rel	5.62757e-25	0.264574	0.569	0.409	0.16	1.26705e-20	2_Chondro
Psma3	5.80078e-25	-0.269402	0.943	0.959	-0.016	1.30605e-20	2_Chondro
Actr10	5.9663e-25	-0.280262	0.618	0.748	-0.13	1.34331e-20	2_Chondro
Traf4	6.64075e-25	-0.221282	0.118	0.294	-0.176	1.49517e-20	2_Chondro
Pxdc1	7.46446e-25	-0.332372	0.484	0.664	-0.18	1.68062e-20	2_Chondro
Chka	7.70125e-25	-0.486471	0.451	0.618	-0.167	1.73394e-20	2_Chondro
Nme1	8.88066e-25	-0.363994	0.949	0.94	0.009	1.99948e-20	2_Chondro
Tspan2	9.14162e-25	0.228263	0.389	0.231	0.158	2.05824e-20	2_Chondro
Arpc1a	9.46417e-25	-0.293621	0.573	0.718	-0.145	2.13086e-20	2_Chondro
Cs	9.49953e-25	-0.238973	0.293	0.496	-0.203	2.13882e-20	2_Chondro
Per2	1.00687e-24	0.203491	0.361	0.201	0.16	2.26697e-20	2_Chondro
Slc20a2	1.22463e-24	-0.656033	0.233	0.401	-0.168	2.75726e-20	2_Chondro
Ndufa3	1.47291e-24	-0.304383	0.604	0.752	-0.148	3.31627e-20	2_Chondro
Krt16	1.50952e-24	1.2707	0.255	0.117	0.138	3.39868e-20	2_Chondro
Dpysl2	1.611e-24	-0.272201	0.255	0.445	-0.19	3.62716e-20	2_Chondro
Adgrg2	1.72455e-24	0.201504	0.325	0.175	0.15	3.88283e-20	2_Chondro
Ctnnal1	1.9797e-24	0.21123	0.397	0.242	0.155	4.45729e-20	2_Chondro
Nedd8	2.07097e-24	-0.269703	0.938	0.964	-0.026	4.66278e-20	2_Chondro
Nbl1	2.50732e-24	-0.240073	0.095	0.262	-0.167	5.64522e-20	2_Chondro
mt-Cytb	3.04532e-24	-0.324327	1	1	0	6.85653e-20	2_Chondro
Med10	3.19092e-24	-0.336869	0.54	0.687	-0.147	7.18435e-20	2_Chondro
Ptgs2	3.44741e-24	-0.584172	0.115	0.283	-0.168	7.76183e-20	2_Chondro
Prdx2	4.06875e-24	-0.573016	0.905	0.915	-0.01	9.16079e-20	2_Chondro
Mettl1	4.49753e-24	0.255877	0.73	0.581	0.149	1.01262e-19	2_Chondro
Epb41l1	4.54755e-24	0.218558	0.425	0.267	0.158	1.02388e-19	2_Chondro
Sqle	4.55111e-24	0.279337	0.704	0.515	0.189	1.02468e-19	2_Chondro
Zfp651	4.61789e-24	-0.268408	0.176	0.353	-0.177	1.03972e-19	2_Chondro
Lrrfip2	4.66356e-24	-0.248904	0.283	0.478	-0.195	1.05e-19	2_Chondro
Kctd10	4.8659e-24	-0.238634	0.299	0.497	-0.198	1.09556e-19	2_Chondro
Jtb	5.00218e-24	-0.277759	0.485	0.651	-0.166	1.12624e-19	2_Chondro
Incenp	5.35753e-24	-0.216411	0.054	0.201	-0.147	1.20625e-19	2_Chondro
Col4a1	5.46796e-24	-1.1053	0.126	0.283	-0.157	1.23111e-19	2_Chondro
Fbxl7	5.95927e-24	-0.281	0.083	0.237	-0.154	1.34173e-19	2_Chondro
mt-Co3	6.1189e-24	-0.390444	1	1	0	1.37767e-19	2_Chondro
Eef1d	7.8482e-24	0.231488	0.98	0.955	0.025	1.76702e-19	2_Chondro
Scara3	8.27299e-24	-0.566697	0.295	0.438	-0.143	1.86266e-19	2_Chondro
Pts	8.58334e-24	0.235734	0.556	0.402	0.154	1.93254e-19	2_Chondro
Ptprg	9.07835e-24	-0.233264	0.088	0.243	-0.155	2.04399e-19	2_Chondro
Glmp	1.06897e-23	-0.251343	0.2	0.388	-0.188	2.40678e-19	2_Chondro
Ndufa13	1.08271e-23	-0.25267	0.967	0.968	-0.001	2.43772e-19	2_Chondro
Mrpl18	1.12754e-23	-0.277268	0.536	0.677	-0.141	2.53867e-19	2_Chondro
Dnajb11	1.18326e-23	-0.27943	0.647	0.769	-0.122	2.66412e-19	2_Chondro
Mpdu1	1.30447e-23	-0.261296	0.32	0.516	-0.196	2.93701e-19	2_Chondro
Phlda1	1.37467e-23	0.644318	0.914	0.845	0.069	3.09506e-19	2_Chondro
Mgat1	1.72343e-23	-0.24194	0.249	0.442	-0.193	3.8803e-19	2_Chondro
Usp25	1.8665e-23	-0.228768	0.18	0.361	-0.181	4.20242e-19	2_Chondro
Tob2	2.73603e-23	-0.258146	0.208	0.4	-0.192	6.16016e-19	2_Chondro
Ssu72	2.74963e-23	-0.273092	0.593	0.734	-0.141	6.19079e-19	2_Chondro
Trappc1	3.03585e-23	-0.230361	0.257	0.446	-0.189	6.83521e-19	2_Chondro
Nr2f6	3.26171e-23	-0.272485	0.307	0.501	-0.194	7.34374e-19	2_Chondro
Tmed9	3.34434e-23	0.215824	0.998	0.981	0.017	7.52978e-19	2_Chondro
Slc25a51	3.57852e-23	-0.253465	0.282	0.462	-0.18	8.05705e-19	2_Chondro
Tmem57	3.58674e-23	-0.273542	0.469	0.64	-0.171	8.07554e-19	2_Chondro
Snx2	3.61863e-23	-0.243633	0.291	0.484	-0.193	8.14733e-19	2_Chondro
Tmem109	3.69183e-23	-0.265691	0.335	0.531	-0.196	8.31215e-19	2_Chondro
Pxn	3.77013e-23	0.204494	0.475	0.324	0.151	8.48846e-19	2_Chondro
Ihh	3.91824e-23	-0.402287	0.064	0.209	-0.145	8.82192e-19	2_Chondro
Ndufa2	4.54242e-23	-0.245387	0.955	0.968	-0.013	1.02273e-18	2_Chondro
Wipi1	5.488e-23	-0.280435	0.485	0.644	-0.159	1.23562e-18	2_Chondro
Comt	6.30882e-23	-0.288132	0.388	0.571	-0.183	1.42043e-18	2_Chondro
Tenm3	6.76408e-23	0.225201	0.42	0.271	0.149	1.52293e-18	2_Chondro
mt-Nd4	7.14745e-23	-0.286427	1	1	0	1.60925e-18	2_Chondro
Lrp10	7.22152e-23	-0.269127	0.325	0.51	-0.185	1.62592e-18	2_Chondro
Psma2	7.4897e-23	-0.257469	0.9	0.924	-0.024	1.6863e-18	2_Chondro
Hip1r	7.62629e-23	0.210197	0.697	0.45	0.247	1.71706e-18	2_Chondro
Fermt2	8.40535e-23	-0.360049	0.671	0.788	-0.117	1.89247e-18	2_Chondro
Eif5	9.23863e-23	-0.272992	0.951	0.969	-0.018	2.08008e-18	2_Chondro
Mogs	1.06583e-22	0.237666	0.673	0.54	0.133	2.39971e-18	2_Chondro
Gamt	1.11327e-22	-0.305115	0.175	0.336	-0.161	2.50652e-18	2_Chondro
Fam20b	1.28085e-22	0.236266	0.709	0.53	0.179	2.88383e-18	2_Chondro
Anxa5	1.36368e-22	0.239067	0.993	0.97	0.023	3.07033e-18	2_Chondro
Psmc5	1.38468e-22	-0.264117	0.648	0.766	-0.118	3.1176e-18	2_Chondro
Ap1s1	1.45542e-22	-0.246206	0.404	0.596	-0.192	3.27689e-18	2_Chondro
Lxn	1.53415e-22	-0.360078	0.432	0.566	-0.134	3.45413e-18	2_Chondro
Oaz1	1.55892e-22	-0.232743	0.992	0.996	-0.004	3.50992e-18	2_Chondro
Fam89a	1.57403e-22	0.250044	0.634	0.397	0.237	3.54393e-18	2_Chondro
Mrpl14	1.593e-22	-0.250623	0.64	0.765	-0.125	3.58663e-18	2_Chondro
Vim	1.70551e-22	-0.616614	0.973	0.974	-0.001	3.83996e-18	2_Chondro
Batf3	1.92646e-22	0.286247	0.511	0.344	0.167	4.33743e-18	2_Chondro
Fkbp8	2.06758e-22	-0.268718	0.705	0.821	-0.116	4.65517e-18	2_Chondro
Fzd5	2.13234e-22	-0.203384	0.077	0.223	-0.146	4.80096e-18	2_Chondro
Cdkn1c	2.16362e-22	-0.349047	0.985	0.794	0.191	4.87138e-18	2_Chondro
Zbtb7a	2.33808e-22	-0.331418	0.297	0.468	-0.171	5.26419e-18	2_Chondro
Npdc1	2.41677e-22	-0.216567	0.08	0.231	-0.151	5.44136e-18	2_Chondro
Pten	2.86443e-22	-0.289173	0.473	0.65	-0.177	6.44926e-18	2_Chondro
Edf1	2.88716e-22	-0.257368	0.837	0.884	-0.047	6.50043e-18	2_Chondro
Trip6	2.92012e-22	-0.264705	0.268	0.447	-0.179	6.57465e-18	2_Chondro
Txndc17	2.9375e-22	-0.244901	0.86	0.882	-0.022	6.61379e-18	2_Chondro
Commd2	3.24214e-22	-0.200345	0.298	0.495	-0.197	7.29968e-18	2_Chondro
Actb	3.40386e-22	-0.430811	1	1	0	7.6638e-18	2_Chondro
Angpt1	4.03397e-22	-0.314157	0.072	0.215	-0.143	9.08249e-18	2_Chondro
Hbp1	4.47343e-22	-0.301284	0.42	0.606	-0.186	1.00719e-17	2_Chondro
2007-09-01	4.675e-22	-0.312763	0.814	0.882	-0.068	1.05258e-17	2_Chondro
Polr2j	4.73471e-22	-0.278895	0.551	0.697	-0.146	1.06602e-17	2_Chondro
Atp13a3	5.21144e-22	-0.3217	0.275	0.461	-0.186	1.17336e-17	2_Chondro
Tmem41b	5.86808e-22	0.282776	0.609	0.458	0.151	1.3212e-17	2_Chondro
Pbx1	6.09452e-22	-0.369689	0.276	0.443	-0.167	1.37218e-17	2_Chondro
Rrad	6.28544e-22	0.80746	0.262	0.131	0.131	1.41517e-17	2_Chondro
Serinc3	6.33298e-22	-0.341056	0.753	0.842	-0.089	1.42587e-17	2_Chondro
Sdhb	6.769e-22	-0.273718	0.627	0.757	-0.13	1.52404e-17	2_Chondro
Nt5dc2	6.79457e-22	-0.312189	0.758	0.839	-0.081	1.5298e-17	2_Chondro
Nfix	7.18709e-22	0.239943	0.9	0.818	0.082	1.61817e-17	2_Chondro
Ggnbp2	7.43778e-22	-0.279803	0.488	0.656	-0.168	1.67462e-17	2_Chondro
Top2a	8.22875e-22	-0.632152	0.122	0.274	-0.152	1.8527e-17	2_Chondro
Smc2	9.63365e-22	-0.411988	0.134	0.287	-0.153	2.16902e-17	2_Chondro
Rspo3	9.80378e-22	-0.487641	0.277	0.441	-0.164	2.20732e-17	2_Chondro
Nucks1	9.83688e-22	-0.446553	0.816	0.853	-0.037	2.21477e-17	2_Chondro
Ptpn2	1.01911e-21	0.256566	0.747	0.614	0.133	2.29453e-17	2_Chondro
Stx7	1.06591e-21	-0.277218	0.299	0.474	-0.175	2.3999e-17	2_Chondro
Agrn	1.11187e-21	-0.202438	0.109	0.266	-0.157	2.50339e-17	2_Chondro
Pltp	1.15956e-21	-0.285456	0.192	0.367	-0.175	2.61075e-17	2_Chondro
Ywhaz	1.17035e-21	-0.296062	0.863	0.915	-0.052	2.63505e-17	2_Chondro
Sun2	1.2578e-21	-0.220796	0.141	0.306	-0.165	2.83193e-17	2_Chondro
Jmjd6	1.40638e-21	-0.22202	0.304	0.494	-0.19	3.16645e-17	2_Chondro
Nsa2	1.51232e-21	0.244689	0.952	0.89	0.062	3.40498e-17	2_Chondro
Dazap1	1.55387e-21	-0.284601	0.597	0.734	-0.137	3.49854e-17	2_Chondro
Mtx2	1.61235e-21	-0.235152	0.217	0.388	-0.171	3.6302e-17	2_Chondro
Rgl1	1.69359e-21	-0.209875	0.093	0.244	-0.151	3.81311e-17	2_Chondro
Gpc4	1.77082e-21	-0.21711	0.262	0.451	-0.189	3.987e-17	2_Chondro
Cars	1.8431e-21	0.244713	0.554	0.41	0.144	4.14973e-17	2_Chondro
Atp5j2	1.88645e-21	-0.235256	0.953	0.963	-0.01	4.24734e-17	2_Chondro
Atp1b3	1.95089e-21	-0.404547	0.75	0.792	-0.042	4.39242e-17	2_Chondro
Tbcb	2.25618e-21	-0.284579	0.657	0.77	-0.113	5.0798e-17	2_Chondro
Arc	2.76812e-21	0.570567	0.283	0.15	0.133	6.23243e-17	2_Chondro
Tsc22d2	2.87364e-21	-0.363836	0.356	0.516	-0.16	6.47e-17	2_Chondro
Bcl2	3.39905e-21	0.213327	0.563	0.406	0.157	7.65296e-17	2_Chondro
Actr2	3.41005e-21	-0.270387	0.573	0.715	-0.142	7.67772e-17	2_Chondro
G3bp2	3.52024e-21	-0.259088	0.468	0.637	-0.169	7.92582e-17	2_Chondro
Hist1h2bc	3.59067e-21	0.512298	0.821	0.705	0.116	8.0844e-17	2_Chondro
Psip1	3.68797e-21	-0.353195	0.46	0.606	-0.146	8.30346e-17	2_Chondro
Pgd	3.87113e-21	-0.271848	0.499	0.653	-0.154	8.71584e-17	2_Chondro
Mrpl43	4.19724e-21	-0.238636	0.361	0.536	-0.175	9.45008e-17	2_Chondro
Vdr	4.35468e-21	-0.339131	0.402	0.571	-0.169	9.80455e-17	2_Chondro
Gm5617	4.62352e-21	0.207405	0.596	0.443	0.153	1.04098e-16	2_Chondro
Msl1	4.81212e-21	-0.223091	0.263	0.444	-0.181	1.08345e-16	2_Chondro
Rab5c	5.21606e-21	-0.263318	0.489	0.664	-0.175	1.1744e-16	2_Chondro
Hsp90aa1	5.25148e-21	-0.253679	0.993	0.99	0.003	1.18237e-16	2_Chondro
Phf5a	6.19958e-21	-0.261664	0.648	0.751	-0.103	1.39584e-16	2_Chondro
Abl1	7.19263e-21	-0.20063	0.129	0.289	-0.16	1.61942e-16	2_Chondro
Pclaf	7.67488e-21	-0.533909	0.07	0.206	-0.136	1.728e-16	2_Chondro
Kpnb1	7.86946e-21	-0.291275	0.555	0.7	-0.145	1.77181e-16	2_Chondro
Birc5	8.10235e-21	-0.624896	0.111	0.254	-0.143	1.82424e-16	2_Chondro
Prdm2	8.37619e-21	-0.221736	0.205	0.384	-0.179	1.8859e-16	2_Chondro
Il11	8.40832e-21	0.815643	0.275	0.145	0.13	1.89313e-16	2_Chondro
Plod1	9.25863e-21	0.236314	0.821	0.681	0.14	2.08458e-16	2_Chondro
Stmn1	9.97425e-21	-0.700245	0.286	0.438	-0.152	2.2457e-16	2_Chondro
Sptbn1	1.07284e-20	-0.318266	0.674	0.802	-0.128	2.4155e-16	2_Chondro
Dlg5	1.20952e-20	-0.274278	0.125	0.274	-0.149	2.72323e-16	2_Chondro
Celf1	1.28905e-20	-0.278769	0.396	0.57	-0.174	2.90231e-16	2_Chondro
Runx1	1.3575e-20	-0.530976	0.726	0.831	-0.105	3.05641e-16	2_Chondro
Snhg18	1.44565e-20	0.237579	0.958	0.855	0.103	3.25487e-16	2_Chondro
Psmd1	1.50364e-20	-0.248443	0.604	0.741	-0.137	3.38545e-16	2_Chondro
Sfn	1.51656e-20	0.390419	0.244	0.121	0.123	3.41453e-16	2_Chondro
Atxn1	1.67379e-20	0.234383	0.574	0.44	0.134	3.76855e-16	2_Chondro
Gar1	1.69842e-20	0.222181	0.687	0.566	0.121	3.824e-16	2_Chondro
Col6a3	2.08719e-20	-0.749184	0.874	0.871	0.003	4.69931e-16	2_Chondro
Spns2	2.09596e-20	-0.210368	0.068	0.201	-0.133	4.71905e-16	2_Chondro
Ccng2	2.12698e-20	-0.211365	0.084	0.223	-0.139	4.78891e-16	2_Chondro
Kirrel	2.29048e-20	-0.317846	0.271	0.434	-0.163	5.15701e-16	2_Chondro
Krtcap2	2.3819e-20	-0.222936	0.978	0.97	0.008	5.36285e-16	2_Chondro
Maf	2.44228e-20	-0.407307	0.276	0.443	-0.167	5.4988e-16	2_Chondro
Lamtor1	2.64221e-20	-0.258508	0.584	0.734	-0.15	5.94894e-16	2_Chondro
Timm13	2.86888e-20	-0.241666	0.903	0.934	-0.031	6.45929e-16	2_Chondro
Sucla2	2.9292e-20	-0.210627	0.303	0.482	-0.179	6.5951e-16	2_Chondro
Wsb2	3.11686e-20	-0.231435	0.529	0.661	-0.132	7.01761e-16	2_Chondro
Tomm7	3.33257e-20	0.221698	0.934	0.87	0.064	7.50328e-16	2_Chondro
Srrm2	3.95537e-20	-0.258772	0.925	0.952	-0.027	8.90552e-16	2_Chondro
Osbpl8	4.18886e-20	-0.264281	0.368	0.546	-0.178	9.43121e-16	2_Chondro
Ttyh2	4.37784e-20	-0.237675	0.141	0.299	-0.158	9.85671e-16	2_Chondro
Kdm2a	4.90687e-20	-0.28078	0.385	0.565	-0.18	1.10478e-15	2_Chondro
Wsb1	4.93127e-20	-0.402742	0.604	0.755	-0.151	1.11028e-15	2_Chondro
Atp5a1	4.95381e-20	-0.234951	0.985	0.984	0.001	1.11535e-15	2_Chondro
Jak1	5.13741e-20	-0.375497	0.565	0.709	-0.144	1.15669e-15	2_Chondro
Htra2	5.17846e-20	0.201421	0.594	0.453	0.141	1.16593e-15	2_Chondro
Hnrnpa3	5.24142e-20	-0.287872	0.934	0.946	-0.012	1.18011e-15	2_Chondro
Rnf10	5.75187e-20	-0.257703	0.576	0.715	-0.139	1.29503e-15	2_Chondro
Arpp19	6.15565e-20	-0.254197	0.744	0.831	-0.087	1.38595e-15	2_Chondro
Ykt6	6.48454e-20	-0.218419	0.389	0.561	-0.172	1.45999e-15	2_Chondro
Mia3	6.72946e-20	-0.248567	0.554	0.699	-0.145	1.51514e-15	2_Chondro
Agbl3	8.08508e-20	-0.324852	0.146	0.294	-0.148	1.82036e-15	2_Chondro
Eif4g3	8.29544e-20	-0.292207	0.533	0.685	-0.152	1.86772e-15	2_Chondro
Mbd2	8.41025e-20	-0.252143	0.694	0.762	-0.068	1.89357e-15	2_Chondro
Ciapin1	8.68681e-20	-0.221559	0.322	0.502	-0.18	1.95584e-15	2_Chondro
Ebf1	9.30497e-20	-0.924964	0.611	0.712	-0.101	2.09501e-15	2_Chondro
Itgb5	9.38779e-20	-0.359419	0.456	0.61	-0.154	2.11366e-15	2_Chondro
Tbc1d2b	1.14191e-19	-0.221503	0.079	0.211	-0.132	2.571e-15	2_Chondro
Pfkl	1.19245e-19	0.221698	0.707	0.54	0.167	2.68479e-15	2_Chondro
Mcrs1	1.31183e-19	-0.217403	0.388	0.571	-0.183	2.95359e-15	2_Chondro
Spcs2	1.35819e-19	-0.261955	0.887	0.907	-0.02	3.05797e-15	2_Chondro
Adam9	1.49096e-19	-0.237883	0.151	0.304	-0.153	3.35691e-15	2_Chondro
Nop58	1.51807e-19	0.296261	0.878	0.784	0.094	3.41794e-15	2_Chondro
Rab11b	1.80296e-19	-0.277767	0.522	0.674	-0.152	4.05937e-15	2_Chondro
Cox14	2.01731e-19	0.223592	0.878	0.787	0.091	4.54198e-15	2_Chondro
St6galnac6	2.03731e-19	-0.258044	0.319	0.482	-0.163	4.58701e-15	2_Chondro
Lmf2	2.05349e-19	-0.209247	0.279	0.454	-0.175	4.62343e-15	2_Chondro
Lrrc58	2.41096e-19	-0.31698	0.653	0.779	-0.126	5.42828e-15	2_Chondro
Klf13	2.59061e-19	-0.218384	0.327	0.504	-0.177	5.83277e-15	2_Chondro
Slc44a1	2.75474e-19	-0.307611	0.385	0.55	-0.165	6.2023e-15	2_Chondro
Shox2	2.8643e-19	0.231041	0.87	0.78	0.09	6.44897e-15	2_Chondro
Hras	3.0562e-19	-0.227031	0.566	0.71	-0.144	6.88103e-15	2_Chondro
Fbln5	3.54146e-19	-0.489815	0.119	0.258	-0.139	7.9736e-15	2_Chondro
Clcn4	3.64897e-19	-0.262691	0.407	0.577	-0.17	8.21565e-15	2_Chondro
Phldb1	4.03035e-19	0.230306	0.657	0.533	0.124	9.07433e-15	2_Chondro
Csnk1g3	4.66829e-19	-0.250774	0.467	0.635	-0.168	1.05107e-14	2_Chondro
Snf8	5.28265e-19	-0.232457	0.54	0.682	-0.142	1.18939e-14	2_Chondro
Hspa13	5.29332e-19	-0.209924	0.26	0.432	-0.172	1.19179e-14	2_Chondro
Raly	5.47048e-19	-0.355264	0.776	0.858	-0.082	1.23168e-14	2_Chondro
Chmp1a	5.76034e-19	-0.207071	0.382	0.566	-0.184	1.29694e-14	2_Chondro
Nucb2	5.86867e-19	0.215539	0.782	0.62	0.162	1.32133e-14	2_Chondro
Suclg1	6.04976e-19	-0.242597	0.671	0.783	-0.112	1.3621e-14	2_Chondro
Adprh	6.34902e-19	-0.240293	0.244	0.406	-0.162	1.42948e-14	2_Chondro
Zfp36l2	6.79265e-19	-0.495144	0.469	0.613	-0.144	1.52936e-14	2_Chondro
Tax1bp1	7.05501e-19	-0.266922	0.828	0.88	-0.052	1.58844e-14	2_Chondro
Glrx5	7.30895e-19	-0.268804	0.597	0.725	-0.128	1.64561e-14	2_Chondro
Mrps16	7.5882e-19	-0.271837	0.732	0.784	-0.052	1.70848e-14	2_Chondro
Gtf2h5	8.7021e-19	-0.231707	0.849	0.886	-0.037	1.95928e-14	2_Chondro
Lmo7	9.51776e-19	-0.283871	0.305	0.47	-0.165	2.14292e-14	2_Chondro
Arpc3	9.69882e-19	-0.260715	0.858	0.889	-0.031	2.18369e-14	2_Chondro
Efcab14	1.00047e-18	0.204261	0.568	0.438	0.13	2.25256e-14	2_Chondro
Dnm3os	1.00646e-18	-0.244435	0.144	0.293	-0.149	2.26605e-14	2_Chondro
Ogt	1.0086e-18	0.206223	0.754	0.615	0.139	2.27087e-14	2_Chondro
Lamp2	1.01792e-18	-0.342482	0.818	0.892	-0.074	2.29184e-14	2_Chondro
Asns	1.08842e-18	0.219963	0.711	0.551	0.16	2.45057e-14	2_Chondro
Cmtm7	1.09011e-18	-0.255541	0.414	0.58	-0.166	2.45438e-14	2_Chondro
Cycs	1.13172e-18	-0.310085	0.838	0.863	-0.025	2.54808e-14	2_Chondro
Igf1r	1.48007e-18	0.241229	0.944	0.784	0.16	3.33239e-14	2_Chondro
Gprc5c	1.49671e-18	-0.201642	0.18	0.339	-0.159	3.36985e-14	2_Chondro
Nr4a1	1.50902e-18	-0.3968	0.295	0.447	-0.152	3.39757e-14	2_Chondro
Trib1	1.52801e-18	0.684401	0.595	0.476	0.119	3.44031e-14	2_Chondro
Grina	1.65672e-18	-0.240661	0.153	0.299	-0.146	3.73011e-14	2_Chondro
Mt1	1.66503e-18	0.747216	0.751	0.663	0.088	3.74882e-14	2_Chondro
Mex3a	1.70273e-18	-0.230981	0.088	0.217	-0.129	3.83369e-14	2_Chondro
Zc3h7a	1.73737e-18	-0.246146	0.397	0.57	-0.173	3.91169e-14	2_Chondro
Ncstn	1.96718e-18	-0.219007	0.276	0.448	-0.172	4.42912e-14	2_Chondro
Lasp1	2.06216e-18	-0.219157	0.399	0.582	-0.183	4.64294e-14	2_Chondro
Dync1i2	2.08864e-18	-0.258777	0.418	0.584	-0.166	4.70258e-14	2_Chondro
Cxadr	2.25101e-18	0.229454	0.25	0.131	0.119	5.06814e-14	2_Chondro
Efnb1	2.37379e-18	-0.34465	0.41	0.564	-0.154	5.3446e-14	2_Chondro
Rbms3	2.40104e-18	-0.369044	0.122	0.255	-0.133	5.40594e-14	2_Chondro
Banf1	2.50704e-18	-0.258865	0.718	0.793	-0.075	5.64461e-14	2_Chondro
Wdr45b	3.14976e-18	-0.224221	0.405	0.586	-0.181	7.09168e-14	2_Chondro
Coa3	3.19937e-18	-0.225063	0.494	0.645	-0.151	7.20339e-14	2_Chondro
Ube2a	3.27626e-18	-0.24945	0.511	0.665	-0.154	7.3765e-14	2_Chondro
Sh3glb1	3.31484e-18	-0.216136	0.929	0.928	0.001	7.46336e-14	2_Chondro
Atp11a	3.4465e-18	-0.249432	0.157	0.298	-0.141	7.7598e-14	2_Chondro
Tmco1	3.56933e-18	-0.239926	0.764	0.817	-0.053	8.03635e-14	2_Chondro
Klhl24	3.84069e-18	-0.32193	0.373	0.53	-0.157	8.64731e-14	2_Chondro
P4ha1	3.9014e-18	0.207032	0.966	0.788	0.178	8.784e-14	2_Chondro
Elof1	4.06402e-18	-0.231625	0.492	0.641	-0.149	9.15015e-14	2_Chondro
Myo5a	4.13836e-18	-0.233422	0.325	0.49	-0.165	9.31751e-14	2_Chondro
Tmed5	4.21621e-18	-0.321511	0.369	0.531	-0.162	9.49279e-14	2_Chondro
Supt4a	4.2419e-18	-0.28807	0.59	0.713	-0.123	9.55065e-14	2_Chondro
Rexo1	4.36899e-18	-0.223875	0.261	0.426	-0.165	9.83678e-14	2_Chondro
Papss1	4.85692e-18	-0.240926	0.63	0.738	-0.108	1.09353e-13	2_Chondro
Arhgap23	5.43901e-18	-0.218249	0.373	0.549	-0.176	1.22459e-13	2_Chondro
Atp2b4	6.23487e-18	-0.226199	0.219	0.383	-0.164	1.40378e-13	2_Chondro
Clk3	6.2498e-18	-0.200725	0.229	0.389	-0.16	1.40714e-13	2_Chondro
Ap2m1	7.18489e-18	-0.256093	0.788	0.857	-0.069	1.61768e-13	2_Chondro
Cdca3	7.4891e-18	-0.393932	0.1	0.232	-0.132	1.68617e-13	2_Chondro
Dlgap4	7.54974e-18	-0.200736	0.26	0.43	-0.17	1.69982e-13	2_Chondro
Blmh	7.95687e-18	-0.227538	0.537	0.69	-0.153	1.79149e-13	2_Chondro
Txndc15	8.96337e-18	-0.228525	0.375	0.546	-0.171	2.0181e-13	2_Chondro
Eid1	9.33535e-18	0.210868	0.964	0.918	0.046	2.10185e-13	2_Chondro
mt-Co1	9.4914e-18	-0.340168	1	1	0	2.13699e-13	2_Chondro
Spire1	1.18535e-17	0.208181	0.542	0.412	0.13	2.66882e-13	2_Chondro
Plac8	1.20676e-17	-0.678854	0.086	0.209	-0.123	2.71701e-13	2_Chondro
Cyhr1	1.23887e-17	-0.205397	0.36	0.534	-0.174	2.78932e-13	2_Chondro
Hmox2	1.31677e-17	-0.20487	0.324	0.491	-0.167	2.96472e-13	2_Chondro
Taf13	1.37625e-17	0.225226	0.704	0.562	0.142	3.09863e-13	2_Chondro
Rbm42	1.41029e-17	-0.239647	0.455	0.614	-0.159	3.17527e-13	2_Chondro
S100a11	1.42146e-17	-0.405786	0.972	0.976	-0.004	3.20042e-13	2_Chondro
Atp6ap2	1.43906e-17	-0.237104	0.295	0.458	-0.163	3.24003e-13	2_Chondro
Dynll1	1.47988e-17	-0.265302	0.98	0.98	0	3.33196e-13	2_Chondro
Zcchc24	1.52592e-17	-0.279464	0.193	0.334	-0.141	3.4356e-13	2_Chondro
Ccnl1	1.538e-17	-0.386606	0.766	0.84	-0.074	3.46281e-13	2_Chondro
Clmp	1.57989e-17	-0.448976	0.384	0.512	-0.128	3.55713e-13	2_Chondro
Calml3	1.70214e-17	0.213374	0.231	0.119	0.112	3.83237e-13	2_Chondro
Tspan6	1.75723e-17	0.236243	0.766	0.649	0.117	3.95641e-13	2_Chondro
Spc24	1.821e-17	-0.308949	0.128	0.259	-0.131	4.09997e-13	2_Chondro
Ppp1cc	1.85184e-17	-0.259981	0.527	0.669	-0.142	4.16941e-13	2_Chondro
Cyc1	1.9336e-17	-0.219771	0.687	0.786	-0.099	4.35349e-13	2_Chondro
Tjp1	2.14082e-17	-0.214762	0.293	0.463	-0.17	4.82005e-13	2_Chondro
Gdi2	2.3756e-17	-0.202962	0.95	0.952	-0.002	5.34865e-13	2_Chondro
Abca1	2.41211e-17	-0.206268	0.092	0.222	-0.13	5.43086e-13	2_Chondro
Vamp8	2.48949e-17	-0.333647	0.739	0.796	-0.057	5.60508e-13	2_Chondro
Ifngr2	2.51584e-17	-0.288409	0.176	0.313	-0.137	5.66441e-13	2_Chondro
Psmb6	2.56083e-17	-0.241456	0.932	0.949	-0.017	5.7657e-13	2_Chondro
Lima1	2.65954e-17	-0.257094	0.191	0.339	-0.148	5.98795e-13	2_Chondro
Ndufs6	2.71914e-17	-0.224023	0.857	0.891	-0.034	6.12215e-13	2_Chondro
Leprotl1	3.09455e-17	-0.230005	0.469	0.622	-0.153	6.96737e-13	2_Chondro
Slc29a1	3.52313e-17	-0.547389	0.647	0.757	-0.11	7.93232e-13	2_Chondro
Mtpn	3.80776e-17	-0.234097	0.604	0.719	-0.115	8.57317e-13	2_Chondro
Tmx3	3.87019e-17	-0.201169	0.242	0.406	-0.164	8.71373e-13	2_Chondro
Phip	3.96097e-17	-0.355741	0.366	0.518	-0.152	8.91813e-13	2_Chondro
Prr5	4.07919e-17	0.206739	0.545	0.394	0.151	9.1843e-13	2_Chondro
Rab1b	4.17846e-17	-0.214559	0.378	0.544	-0.166	9.40779e-13	2_Chondro
Ppp1r14b	5.00669e-17	-0.278908	0.872	0.931	-0.059	1.12726e-12	2_Chondro
Sppl2a	5.16854e-17	-0.244496	0.584	0.71	-0.126	1.1637e-12	2_Chondro
Ndufb9	5.29108e-17	-0.210302	0.951	0.956	-0.005	1.19129e-12	2_Chondro
Serp1	5.66357e-17	-0.295464	0.919	0.9	0.019	1.27515e-12	2_Chondro
Tra2b	5.70634e-17	-0.302449	0.828	0.905	-0.077	1.28478e-12	2_Chondro
Psme2	6.07178e-17	-0.295465	0.448	0.596	-0.148	1.36706e-12	2_Chondro
Pgm3	6.8994e-17	0.244014	0.723	0.597	0.126	1.5534e-12	2_Chondro
Crk	7.38726e-17	-0.255187	0.434	0.592	-0.158	1.66324e-12	2_Chondro
Coq10b	8.1546e-17	0.312999	0.78	0.695	0.085	1.83601e-12	2_Chondro
Ints2	8.23991e-17	-0.243011	0.268	0.418	-0.15	1.85522e-12	2_Chondro
Myl9	8.9281e-17	-0.865834	0.184	0.307	-0.123	2.01016e-12	2_Chondro
Cdk1	8.93826e-17	-0.448115	0.118	0.244	-0.126	2.01245e-12	2_Chondro
Mafg	9.27037e-17	0.263129	0.693	0.577	0.116	2.08722e-12	2_Chondro
Man1a2	9.29972e-17	-0.244765	0.426	0.584	-0.158	2.09383e-12	2_Chondro
Fdft1	9.50991e-17	0.22487	0.569	0.43	0.139	2.14116e-12	2_Chondro
Rhoc	9.62935e-17	-0.359779	0.654	0.733	-0.079	2.16805e-12	2_Chondro
Mrpl57	9.78688e-17	-0.218009	0.709	0.783	-0.074	2.20351e-12	2_Chondro
Pik3ip1	1.02972e-16	-0.202547	0.163	0.308	-0.145	2.31841e-12	2_Chondro
Kcnma1	1.05143e-16	0.240074	0.641	0.495	0.146	2.36729e-12	2_Chondro
Errfi1	1.06534e-16	0.580858	0.837	0.781	0.056	2.39861e-12	2_Chondro
Acadvl	1.09436e-16	-0.207223	0.31	0.47	-0.16	2.46395e-12	2_Chondro
Nufip2	1.10061e-16	-0.290378	0.602	0.743	-0.141	2.47803e-12	2_Chondro
Psmb4	1.17077e-16	-0.229194	0.957	0.952	0.005	2.63599e-12	2_Chondro
Arpc1b	1.27e-16	-0.403731	0.851	0.879	-0.028	2.85941e-12	2_Chondro
Mrps18c	1.2721e-16	-0.224277	0.47	0.611	-0.141	2.86413e-12	2_Chondro
Ppfibp1	1.2894e-16	-0.250222	0.525	0.641	-0.116	2.90309e-12	2_Chondro
Luzp1	1.38374e-16	-0.26349	0.52	0.653	-0.133	3.1155e-12	2_Chondro
Stard4	1.40254e-16	0.213375	0.575	0.429	0.146	3.15782e-12	2_Chondro
Nap1l4	1.41634e-16	-0.23237	0.441	0.601	-0.16	3.18889e-12	2_Chondro
Zfp292	1.56937e-16	-0.225963	0.347	0.504	-0.157	3.53343e-12	2_Chondro
Guk1	1.61625e-16	0.206689	0.79	0.672	0.118	3.639e-12	2_Chondro
Bex3	1.62025e-16	0.223151	0.882	0.776	0.106	3.64799e-12	2_Chondro
Tbc1d10a	1.6655e-16	0.205875	0.505	0.385	0.12	3.74987e-12	2_Chondro
Bax	1.69786e-16	-0.291494	0.694	0.793	-0.099	3.82274e-12	2_Chondro
Ndufb11	1.97226e-16	-0.21345	0.943	0.939	0.004	4.44054e-12	2_Chondro
Bscl2	2.00622e-16	-0.234067	0.367	0.526	-0.159	4.517e-12	2_Chondro
Ccnd1	2.02578e-16	0.232089	0.525	0.393	0.132	4.56105e-12	2_Chondro
Lims1	2.2535e-16	-0.315686	0.439	0.594	-0.155	5.07376e-12	2_Chondro
Cd44	2.39172e-16	-0.280908	0.278	0.43	-0.152	5.38495e-12	2_Chondro
Zdbf2	2.40137e-16	0.201251	0.325	0.21	0.115	5.4067e-12	2_Chondro
Ccdc124	2.4137e-16	-0.24334	0.463	0.608	-0.145	5.43445e-12	2_Chondro
Ssna1	2.42433e-16	-0.201935	0.354	0.511	-0.157	5.45839e-12	2_Chondro
Cab39	2.56019e-16	-0.286956	0.555	0.65	-0.095	5.76427e-12	2_Chondro
Smim14	2.56025e-16	-0.337054	0.723	0.771	-0.048	5.76439e-12	2_Chondro
2008-09-01	2.57557e-16	-0.246147	0.244	0.397	-0.153	5.7989e-12	2_Chondro
2010107E04Rik	2.73298e-16	-0.211516	0.922	0.932	-0.01	6.15331e-12	2_Chondro
Abhd12	2.7818e-16	-0.224669	0.362	0.51	-0.148	6.26322e-12	2_Chondro
Pros1	2.8595e-16	-0.49146	0.371	0.477	-0.106	6.43817e-12	2_Chondro
Cttn	3.03044e-16	-0.216753	0.466	0.617	-0.151	6.82305e-12	2_Chondro
Rap2a	3.05079e-16	-0.207976	0.182	0.33	-0.148	6.86885e-12	2_Chondro
Camk2d	3.09737e-16	0.339653	0.733	0.649	0.084	6.97373e-12	2_Chondro
Snx18	3.12631e-16	0.227321	0.752	0.611	0.141	7.03889e-12	2_Chondro
P3h2	3.19717e-16	-0.427832	0.314	0.423	-0.109	7.19842e-12	2_Chondro
Surf4	3.44468e-16	-0.241821	0.934	0.912	0.022	7.75571e-12	2_Chondro
Nip7	3.5794e-16	0.201664	0.62	0.508	0.112	8.05901e-12	2_Chondro
Taf1d	3.95848e-16	-0.29714	0.639	0.77	-0.131	8.91253e-12	2_Chondro
Zfp469	3.97637e-16	0.208766	0.579	0.454	0.125	8.95281e-12	2_Chondro
Irf1	3.99335e-16	-0.321493	0.228	0.372	-0.144	8.99102e-12	2_Chondro
Hexim1	4.07482e-16	-0.29171	0.405	0.558	-0.153	9.17446e-12	2_Chondro
Plpp3	4.1073e-16	-0.442439	0.185	0.329	-0.144	9.24758e-12	2_Chondro
Ube2l3	4.34945e-16	-0.212898	0.842	0.87	-0.028	9.79279e-12	2_Chondro
Slc7a1	4.37013e-16	0.236433	0.726	0.582	0.144	9.83934e-12	2_Chondro
Srp9	4.82712e-16	-0.202689	0.964	0.959	0.005	1.08683e-11	2_Chondro
Mlf2	4.91271e-16	-0.214072	0.683	0.782	-0.099	1.1061e-11	2_Chondro
Lmcd1	5.41057e-16	0.288592	0.433	0.295	0.138	1.21819e-11	2_Chondro
Rrm2	5.66842e-16	-0.317923	0.135	0.265	-0.13	1.27625e-11	2_Chondro
Etfa	5.70105e-16	-0.215374	0.577	0.698	-0.121	1.28359e-11	2_Chondro
Smurf2	6.00293e-16	-0.24187	0.359	0.518	-0.159	1.35156e-11	2_Chondro
C1qbp	6.6043e-16	0.214105	0.856	0.774	0.082	1.48696e-11	2_Chondro
Arpc5l	6.83362e-16	-0.216111	0.481	0.625	-0.144	1.53859e-11	2_Chondro
Agt	7.08199e-16	-0.649795	0.231	0.369	-0.138	1.59451e-11	2_Chondro
H13	7.50709e-16	-0.244037	0.729	0.787	-0.058	1.69022e-11	2_Chondro
Cast	7.64307e-16	-0.230975	0.433	0.587	-0.154	1.72084e-11	2_Chondro
Ppp2r5a	8.3817e-16	-0.225682	0.392	0.542	-0.15	1.88714e-11	2_Chondro
Dlst	8.6897e-16	-0.253229	0.424	0.573	-0.149	1.95648e-11	2_Chondro
Kdelr1	8.78063e-16	-0.219459	0.879	0.908	-0.029	1.97696e-11	2_Chondro
Tspo	8.82563e-16	-0.330755	0.38	0.518	-0.138	1.98709e-11	2_Chondro
Ube2b	8.83837e-16	0.213057	0.935	0.869	0.066	1.98996e-11	2_Chondro
Ubb	9.27085e-16	-0.288428	0.998	0.998	0	2.08733e-11	2_Chondro
Plin2	1.05643e-15	-0.214134	0.191	0.336	-0.145	2.37855e-11	2_Chondro
Tgfb1i1	1.05956e-15	-0.219523	0.144	0.276	-0.132	2.3856e-11	2_Chondro
Mocs2	1.07457e-15	-0.210579	0.409	0.566	-0.157	2.41939e-11	2_Chondro
Sae1	1.1125e-15	-0.256252	0.416	0.554	-0.138	2.5048e-11	2_Chondro
Fndc3b	1.1322e-15	0.212931	0.979	0.916	0.063	2.54915e-11	2_Chondro
Atp6v0b	1.16777e-15	-0.245009	0.786	0.825	-0.039	2.62922e-11	2_Chondro
Asap1	1.22458e-15	-0.275825	0.392	0.523	-0.131	2.75713e-11	2_Chondro
3632451O06Rik	1.34613e-15	0.205109	0.588	0.454	0.134	3.03082e-11	2_Chondro
Map1b	1.55496e-15	-0.282707	0.1	0.221	-0.121	3.50099e-11	2_Chondro
Ptpa	1.68038e-15	-0.236447	0.529	0.674	-0.145	3.78337e-11	2_Chondro
Phf14	1.69077e-15	-0.249195	0.41	0.56	-0.15	3.80676e-11	2_Chondro
Exoc5	1.77757e-15	-0.237024	0.448	0.595	-0.147	4.00221e-11	2_Chondro
Uqcrfs1	1.83519e-15	-0.221711	0.671	0.755	-0.084	4.13192e-11	2_Chondro
Eif2s2	1.84324e-15	0.213343	0.987	0.97	0.017	4.15006e-11	2_Chondro
Hp1bp3	1.92285e-15	-0.238975	0.548	0.683	-0.135	4.3293e-11	2_Chondro
Ikbip	2.20741e-15	0.205233	0.879	0.757	0.122	4.96998e-11	2_Chondro
Nxf1	2.24871e-15	-0.268266	0.703	0.804	-0.101	5.06296e-11	2_Chondro
Fam120a	2.30494e-15	0.217541	0.835	0.72	0.115	5.18958e-11	2_Chondro
Mpc2	2.47839e-15	-0.235739	0.771	0.847	-0.076	5.58011e-11	2_Chondro
Socs1	2.47967e-15	0.258633	0.455	0.331	0.124	5.58298e-11	2_Chondro
Mtx1	2.79178e-15	0.207992	0.719	0.604	0.115	6.2857e-11	2_Chondro
Ube2d2a	2.88435e-15	-0.208414	0.807	0.866	-0.059	6.49412e-11	2_Chondro
Pcf11	2.90167e-15	-0.311909	0.489	0.626	-0.137	6.53312e-11	2_Chondro
Sgk1	2.90186e-15	-0.47978	0.556	0.677	-0.121	6.53354e-11	2_Chondro
Pappa	3.55672e-15	-0.627725	0.178	0.295	-0.117	8.00795e-11	2_Chondro
Plec	4.43398e-15	0.258477	0.782	0.662	0.12	9.9831e-11	2_Chondro
Lpl	5.23096e-15	-1.44819	0.416	0.518	-0.102	1.17775e-10	2_Chondro
Glul	5.65501e-15	-0.209011	0.139	0.264	-0.125	1.27322e-10	2_Chondro
Birc6	5.89293e-15	-0.231507	0.652	0.765	-0.113	1.32679e-10	2_Chondro
Spty2d1	6.09364e-15	-0.237435	0.469	0.607	-0.138	1.37198e-10	2_Chondro
Mknk2	6.35739e-15	-0.205967	0.288	0.434	-0.146	1.43137e-10	2_Chondro
Etfb	6.38155e-15	-0.26716	0.749	0.813	-0.064	1.43681e-10	2_Chondro
Slc38a4	7.24992e-15	-0.248866	0.428	0.557	-0.129	1.63232e-10	2_Chondro
Trappc2l	7.34927e-15	-0.203483	0.566	0.685	-0.119	1.65469e-10	2_Chondro
Ehd1	7.80587e-15	-0.209751	0.389	0.534	-0.145	1.75749e-10	2_Chondro
Arpc2	8.07144e-15	-0.228023	0.915	0.937	-0.022	1.81729e-10	2_Chondro
Ctbp1	8.07322e-15	-0.24254	0.657	0.769	-0.112	1.81768e-10	2_Chondro
Psmd3	8.47845e-15	-0.208893	0.66	0.759	-0.099	1.90892e-10	2_Chondro
mt-Atp6	8.69031e-15	-0.281812	1	1	0	1.95662e-10	2_Chondro
Nectin3	9.1194e-15	-0.213466	0.378	0.53	-0.152	2.05323e-10	2_Chondro
Ddx3x	9.63919e-15	-0.249447	0.91	0.935	-0.025	2.17026e-10	2_Chondro
Polr2i	9.9387e-15	-0.209629	0.563	0.692	-0.129	2.2377e-10	2_Chondro
Irs2	1.01718e-14	-0.236779	0.376	0.521	-0.145	2.29017e-10	2_Chondro
Ctnnb1	1.2807e-14	-0.234515	0.99	0.992	-0.002	2.8835e-10	2_Chondro
Herc1	1.3591e-14	-0.21365	0.396	0.547	-0.151	3.06002e-10	2_Chondro
Cald1	1.41122e-14	-0.799119	0.858	0.884	-0.026	3.17736e-10	2_Chondro
Rnaset2a	1.43861e-14	-0.260884	0.579	0.708	-0.129	3.23904e-10	2_Chondro
Col10a1	1.51973e-14	-2.82987	0.185	0.309	-0.124	3.42167e-10	2_Chondro
Psme1	1.7111e-14	-0.286099	0.322	0.455	-0.133	3.85255e-10	2_Chondro
Smtn	1.80457e-14	0.212287	0.561	0.45	0.111	4.06299e-10	2_Chondro
Esyt2	1.95112e-14	-0.207653	0.483	0.612	-0.129	4.39295e-10	2_Chondro
Tns3	2.19403e-14	-0.425069	0.435	0.554	-0.119	4.93985e-10	2_Chondro
Klhl21	2.30707e-14	0.269605	0.593	0.474	0.119	5.19436e-10	2_Chondro
Fam76a	2.52226e-14	0.239106	0.536	0.427	0.109	5.67888e-10	2_Chondro
Yy1	2.80245e-14	-0.230369	0.498	0.631	-0.133	6.30971e-10	2_Chondro
S100a16	3.01632e-14	-0.304841	0.463	0.584	-0.121	6.79124e-10	2_Chondro
Ube2r2	3.15664e-14	-0.261774	0.573	0.692	-0.119	7.10717e-10	2_Chondro
Eml4	3.34365e-14	-0.233975	0.334	0.477	-0.143	7.52823e-10	2_Chondro
Plgrkt	3.3551e-14	-0.207497	0.469	0.603	-0.134	7.554e-10	2_Chondro
Sparc	3.57672e-14	-0.371327	1	1	0	8.05299e-10	2_Chondro
Tacc2	3.65118e-14	0.218605	0.442	0.323	0.119	8.22063e-10	2_Chondro
Vasp	4.4469e-14	-0.282809	0.383	0.506	-0.123	1.00122e-09	2_Chondro
Psmd7	4.54116e-14	-0.204418	0.834	0.874	-0.04	1.02244e-09	2_Chondro
Map4	4.54955e-14	-0.216806	0.414	0.567	-0.153	1.02433e-09	2_Chondro
Bnip2	4.61288e-14	-0.22559	0.602	0.706	-0.104	1.03859e-09	2_Chondro
Fhl2	4.72431e-14	-0.556575	0.331	0.451	-0.12	1.06368e-09	2_Chondro
Pxylp1	4.83631e-14	0.300987	0.647	0.531	0.116	1.0889e-09	2_Chondro
D16Ertd472e	4.93971e-14	-0.226361	0.289	0.429	-0.14	1.11217e-09	2_Chondro
Rnd3	4.97014e-14	-0.272326	0.388	0.52	-0.132	1.11903e-09	2_Chondro
Plekhg2	5.30587e-14	-0.203345	0.13	0.251	-0.121	1.19462e-09	2_Chondro
Ilkap	6.72555e-14	-0.210216	0.382	0.53	-0.148	1.51426e-09	2_Chondro
Ube2n	6.7649e-14	-0.210483	0.732	0.812	-0.08	1.52312e-09	2_Chondro
Ubl5	7.72031e-14	-0.210313	0.895	0.922	-0.027	1.73823e-09	2_Chondro
Sh3bgrl3	7.97744e-14	-0.261397	0.714	0.778	-0.064	1.79612e-09	2_Chondro
Mki67	8.12058e-14	-0.436346	0.155	0.267	-0.112	1.82835e-09	2_Chondro
Ppif	8.27366e-14	0.255792	0.354	0.246	0.108	1.86282e-09	2_Chondro
Dda1	8.62646e-14	-0.209665	0.512	0.627	-0.115	1.94225e-09	2_Chondro
Ntan1	8.88429e-14	-0.24928	0.708	0.767	-0.059	2.0003e-09	2_Chondro
Vegfa	9.50237e-14	0.370683	0.802	0.714	0.088	2.13946e-09	2_Chondro
Psmb7	1.01101e-13	-0.204453	0.763	0.836	-0.073	2.27628e-09	2_Chondro
Prdx5	1.19576e-13	-0.233587	0.946	0.944	0.002	2.69225e-09	2_Chondro
Ctnnd1	1.34447e-13	-0.238016	0.368	0.506	-0.138	3.02707e-09	2_Chondro
Lpp	1.39057e-13	-0.343978	0.595	0.709	-0.114	3.13086e-09	2_Chondro
Ube2c	1.40482e-13	-0.471573	0.126	0.24	-0.114	3.16294e-09	2_Chondro
Tmem259	1.54099e-13	-0.205502	0.537	0.668	-0.131	3.46955e-09	2_Chondro
Socs3	1.59729e-13	-0.49565	0.476	0.608	-0.132	3.5963e-09	2_Chondro
Lsm3	1.63788e-13	-0.228053	0.504	0.613	-0.109	3.68768e-09	2_Chondro
Stub1	1.65805e-13	-0.201014	0.78	0.837	-0.057	3.73311e-09	2_Chondro
Tspan17	1.72387e-13	-0.231485	0.334	0.471	-0.137	3.8813e-09	2_Chondro
Gxylt1	1.85249e-13	-0.201541	0.255	0.389	-0.134	4.17089e-09	2_Chondro
2007-03-01	2.48432e-13	-0.214899	0.562	0.693	-0.131	5.59345e-09	2_Chondro
Rrm1	2.48477e-13	-0.278834	0.2	0.32	-0.12	5.59446e-09	2_Chondro
Dnajc9	2.69945e-13	-0.23167	0.248	0.372	-0.124	6.07781e-09	2_Chondro
Sesn2	2.88628e-13	0.217612	0.467	0.364	0.103	6.49846e-09	2_Chondro
Arid1a	2.94017e-13	-0.213589	0.442	0.581	-0.139	6.61979e-09	2_Chondro
Pnrc1	3.00938e-13	-0.326364	0.735	0.8	-0.065	6.77561e-09	2_Chondro
Hnrnpll	3.07513e-13	-0.236764	0.348	0.495	-0.147	6.92365e-09	2_Chondro
Idh2	3.18684e-13	-0.278286	0.747	0.812	-0.065	7.17517e-09	2_Chondro
Ubald2	3.19528e-13	-0.227136	0.397	0.53	-0.133	7.19417e-09	2_Chondro
Bub3	3.42068e-13	-0.243703	0.461	0.579	-0.118	7.70166e-09	2_Chondro
Ckap5	4.38068e-13	-0.203133	0.265	0.392	-0.127	9.86311e-09	2_Chondro
Sptan1	4.42253e-13	-0.252467	0.434	0.572	-0.138	9.95733e-09	2_Chondro
Ccdc88c	4.42963e-13	-0.207186	0.183	0.307	-0.124	9.9733e-09	2_Chondro
Zc3h15	4.52058e-13	-0.222326	0.786	0.832	-0.046	1.01781e-08	2_Chondro
Pdha1	5.71183e-13	-0.222129	0.499	0.627	-0.128	1.28602e-08	2_Chondro
Tln2	5.76711e-13	-0.419226	0.303	0.414	-0.111	1.29847e-08	2_Chondro
Hook3	5.80644e-13	-0.21622	0.531	0.651	-0.12	1.30732e-08	2_Chondro
Fgfr2	6.25652e-13	-0.488066	0.402	0.494	-0.092	1.40865e-08	2_Chondro
Ammecr1	6.31018e-13	-0.206252	0.274	0.41	-0.136	1.42074e-08	2_Chondro
Pim1	6.87702e-13	-0.349777	0.509	0.616	-0.107	1.54836e-08	2_Chondro
Serinc5	8.09396e-13	-0.649339	0.452	0.514	-0.062	1.82236e-08	2_Chondro
Esd	1.13736e-12	-0.259393	0.845	0.888	-0.043	2.56077e-08	2_Chondro
Acaa1a	1.34755e-12	-0.204017	0.531	0.649	-0.118	3.03401e-08	2_Chondro
Brd3	1.36641e-12	-0.224726	0.395	0.526	-0.131	3.07647e-08	2_Chondro
Plcd1	1.38734e-12	-0.202358	0.44	0.551	-0.111	3.12359e-08	2_Chondro
Ints6	1.39671e-12	-0.231743	0.441	0.582	-0.141	3.14469e-08	2_Chondro
Id3	1.43745e-12	-0.639965	0.849	0.904	-0.055	3.23641e-08	2_Chondro
Btbd7	1.66079e-12	-0.242182	0.445	0.568	-0.123	3.73927e-08	2_Chondro
Baz1a	1.73746e-12	-0.205568	0.218	0.342	-0.124	3.91188e-08	2_Chondro
Dnajc3	1.81695e-12	-0.207668	0.8	0.851	-0.051	4.09086e-08	2_Chondro
Brd1	1.85643e-12	-0.21581	0.43	0.569	-0.139	4.17976e-08	2_Chondro
Col3a1	2.02227e-12	-1.71687	0.653	0.677	-0.024	4.55315e-08	2_Chondro
Hmgn5	2.05559e-12	-0.216754	0.253	0.374	-0.121	4.62816e-08	2_Chondro
Mien1	2.25289e-12	-0.251335	0.605	0.656	-0.051	5.07237e-08	2_Chondro
Tsen34	2.25512e-12	-0.242284	0.567	0.686	-0.119	5.0774e-08	2_Chondro
2005-03-01	2.34073e-12	-0.210539	0.565	0.682	-0.117	5.27016e-08	2_Chondro
Dnaja1	2.3645e-12	-0.408543	0.9	0.928	-0.028	5.32366e-08	2_Chondro
Adgrl1	2.43073e-12	-0.2069	0.244	0.363	-0.119	5.47278e-08	2_Chondro
Oaz2	2.5782e-12	-0.262449	0.384	0.508	-0.124	5.80481e-08	2_Chondro
Hilpda	2.91817e-12	0.445365	0.373	0.268	0.105	6.57027e-08	2_Chondro
Slc13a5	3.39864e-12	-0.423544	0.237	0.347	-0.11	7.65204e-08	2_Chondro
Spry2	3.45587e-12	0.242937	0.343	0.243	0.1	7.78089e-08	2_Chondro
Cenpw	3.51282e-12	-0.24487	0.249	0.368	-0.119	7.90912e-08	2_Chondro
Serpinb6a	3.68834e-12	-0.237544	0.665	0.759	-0.094	8.3043e-08	2_Chondro
2004-09-01	3.7167e-12	-0.25153	0.148	0.25	-0.102	8.36816e-08	2_Chondro
4833422C13Rik	3.82434e-12	-0.208598	0.105	0.205	-0.1	8.6105e-08	2_Chondro
Plscr3	3.9712e-12	-0.230199	0.234	0.351	-0.117	8.94117e-08	2_Chondro
Cpz	4.05972e-12	-0.462544	0.128	0.228	-0.1	9.14046e-08	2_Chondro
Lrrc59	5.2117e-12	-0.231039	0.905	0.871	0.034	1.17341e-07	2_Chondro
Fis1	5.64952e-12	-0.202479	0.746	0.814	-0.068	1.27199e-07	2_Chondro
Pfdn6	6.12497e-12	-0.200194	0.577	0.673	-0.096	1.37904e-07	2_Chondro
Son	6.25084e-12	-0.220227	0.943	0.958	-0.015	1.40738e-07	2_Chondro
Mmp16	6.27585e-12	-0.234019	0.231	0.344	-0.113	1.41301e-07	2_Chondro
Rnaset2b	6.52681e-12	-0.238178	0.582	0.677	-0.095	1.46951e-07	2_Chondro
Ppp1r12a	7.69818e-12	-0.235119	0.563	0.679	-0.116	1.73324e-07	2_Chondro
Mpzl1	7.82715e-12	-0.297472	0.607	0.713	-0.106	1.76228e-07	2_Chondro
Tet3	8.47438e-12	0.2094	0.384	0.282	0.102	1.90801e-07	2_Chondro
Csnk1a1	9.37817e-12	-0.210521	0.958	0.958	0	2.1115e-07	2_Chondro
Fdps	9.47939e-12	0.229344	0.836	0.672	0.164	2.13428e-07	2_Chondro
Serpine1	9.79134e-12	0.784269	0.384	0.295	0.089	2.20452e-07	2_Chondro
Sqstm1	9.98354e-12	0.208397	0.789	0.69	0.099	2.24779e-07	2_Chondro
Pard3	1.05936e-11	-0.210328	0.32	0.446	-0.126	2.38516e-07	2_Chondro
Ggh	1.07924e-11	-0.242976	0.437	0.548	-0.111	2.42992e-07	2_Chondro
Dtnbp1	1.08984e-11	-0.206096	0.345	0.473	-0.128	2.45377e-07	2_Chondro
Tgfb2	1.36044e-11	0.298763	0.722	0.59	0.132	3.06303e-07	2_Chondro
Ahcyl1	1.37289e-11	-0.212405	0.442	0.573	-0.131	3.09107e-07	2_Chondro
H2afy	1.3779e-11	-0.240548	0.69	0.775	-0.085	3.10235e-07	2_Chondro
Fos	1.53418e-11	0.353516	0.945	0.891	0.054	3.4542e-07	2_Chondro
Trim28	1.56451e-11	-0.205824	0.487	0.608	-0.121	3.52249e-07	2_Chondro
Sri	1.69057e-11	-0.225542	0.584	0.696	-0.112	3.80633e-07	2_Chondro
Ncor1	1.69889e-11	-0.240146	0.735	0.818	-0.083	3.82505e-07	2_Chondro
H1fx	1.74382e-11	-0.242243	0.29	0.404	-0.114	3.9262e-07	2_Chondro
Hmgb1	1.75052e-11	-0.349165	0.983	0.988	-0.005	3.9413e-07	2_Chondro
Vcl	1.83937e-11	-0.242752	0.409	0.534	-0.125	4.14133e-07	2_Chondro
Slc35g1	2.29451e-11	-0.210438	0.321	0.438	-0.117	5.16608e-07	2_Chondro
S100a6	2.64706e-11	-0.538944	0.782	0.81	-0.028	5.95987e-07	2_Chondro
Slc3a2	2.79052e-11	0.22804	0.894	0.829	0.065	6.28285e-07	2_Chondro
Ppm1a	2.95796e-11	-0.223959	0.61	0.701	-0.091	6.65985e-07	2_Chondro
Tyms	3.09475e-11	-0.27679	0.178	0.284	-0.106	6.96783e-07	2_Chondro
Bri3	3.09677e-11	-0.216105	0.778	0.849	-0.071	6.97238e-07	2_Chondro
Emc2	3.24803e-11	-0.203703	0.42	0.552	-0.132	7.31295e-07	2_Chondro
Ndufb2	3.45007e-11	-0.237894	0.846	0.884	-0.038	7.76784e-07	2_Chondro
Tpr	3.6166e-11	-0.202632	0.818	0.869	-0.051	8.14278e-07	2_Chondro
Tanc1	3.95706e-11	-0.234287	0.504	0.629	-0.125	8.90931e-07	2_Chondro
Arhgap31	3.98066e-11	-0.221983	0.295	0.412	-0.117	8.96246e-07	2_Chondro
Arglu1	4.6327e-11	-0.215938	0.616	0.726	-0.11	1.04305e-06	2_Chondro
Tpm1	4.67483e-11	-0.981434	0.944	0.929	0.015	1.05254e-06	2_Chondro
Zyx	5.28826e-11	0.205294	0.576	0.469	0.107	1.19065e-06	2_Chondro
Ogn	5.46752e-11	-0.674629	0.263	0.359	-0.096	1.23101e-06	2_Chondro
Ift20	5.58168e-11	-0.273219	0.901	0.896	0.005	1.25672e-06	2_Chondro
Hectd1	5.73793e-11	-0.201819	0.667	0.767	-0.1	1.2919e-06	2_Chondro
Fam126a	6.72411e-11	-0.203628	0.244	0.361	-0.117	1.51393e-06	2_Chondro
Rbbp6	7.26073e-11	-0.27143	0.794	0.858	-0.064	1.63475e-06	2_Chondro
AC127341.3	9.76933e-11	0.270201	0.267	0.174	0.093	2.19956e-06	2_Chondro
Smpd3	1.00086e-10	-0.974642	0.728	0.637	0.091	2.25344e-06	2_Chondro
Wisp1	1.06906e-10	-0.431952	0.43	0.51	-0.08	2.40698e-06	2_Chondro
Tcf3	1.07249e-10	-0.212492	0.427	0.536	-0.109	2.41472e-06	2_Chondro
Csnk2b	1.19763e-10	-0.205164	0.659	0.721	-0.062	2.69646e-06	2_Chondro
Nsd3	1.20478e-10	-0.239847	0.503	0.622	-0.119	2.71256e-06	2_Chondro
Arf4	1.20559e-10	-0.224897	0.99	0.979	0.011	2.71438e-06	2_Chondro
Fyn	1.29162e-10	-0.267479	0.417	0.511	-0.094	2.90808e-06	2_Chondro
Plxdc2	1.30398e-10	-0.536652	0.312	0.392	-0.08	2.9359e-06	2_Chondro
Nasp	1.32152e-10	-0.297672	0.57	0.662	-0.092	2.97541e-06	2_Chondro
Emp2	1.35989e-10	-0.212198	0.37	0.493	-0.123	3.0618e-06	2_Chondro
Brd4	1.45386e-10	-0.210543	0.651	0.746	-0.095	3.27336e-06	2_Chondro
Kcnq1ot1	1.45716e-10	0.278495	0.912	0.814	0.098	3.28079e-06	2_Chondro
Itpr1	1.47859e-10	-0.217052	0.229	0.337	-0.108	3.32904e-06	2_Chondro
Gng11	1.56629e-10	-0.461701	0.594	0.681	-0.087	3.5265e-06	2_Chondro
Ufm1	2.18306e-10	-0.200441	0.775	0.783	-0.008	4.91516e-06	2_Chondro
Mt2	2.55538e-10	0.445949	0.295	0.206	0.089	5.75345e-06	2_Chondro
Mfap2	2.65474e-10	-0.579199	0.567	0.602	-0.035	5.97715e-06	2_Chondro
Cenpa	3.0674e-10	-0.437814	0.149	0.248	-0.099	6.90626e-06	2_Chondro
Id2	3.11504e-10	0.276072	0.765	0.693	0.072	7.01351e-06	2_Chondro
Ehmt2	3.99128e-10	-0.20424	0.312	0.422	-0.11	8.98637e-06	2_Chondro
Rc3h1	4.03028e-10	-0.201268	0.383	0.502	-0.119	9.07418e-06	2_Chondro
Ubr5	4.23159e-10	-0.22496	0.573	0.683	-0.11	9.52743e-06	2_Chondro
Uhrf2	4.80361e-10	-0.255911	0.343	0.452	-0.109	1.08153e-05	2_Chondro
Ank	4.85379e-10	-0.245066	0.189	0.295	-0.106	1.09283e-05	2_Chondro
Samhd1	5.1329e-10	-0.296211	0.44	0.539	-0.099	1.15567e-05	2_Chondro
Ap3s1	5.37929e-10	-0.201612	0.63	0.713	-0.083	1.21115e-05	2_Chondro
Hnrnpl	5.61943e-10	-0.219278	0.618	0.706	-0.088	1.26522e-05	2_Chondro
Gm8797	5.90521e-10	-0.328243	0.46	0.568	-0.108	1.32956e-05	2_Chondro
2700038G22Rik	6.85624e-10	-0.201175	0.183	0.289	-0.106	1.54368e-05	2_Chondro
Lig1	7.29287e-10	-0.229193	0.168	0.261	-0.093	1.64199e-05	2_Chondro
Colec12	1.00909e-09	-0.264531	0.868	0.888	-0.02	2.27197e-05	2_Chondro
Echs1	1.1647e-09	-0.255632	0.561	0.649	-0.088	2.62232e-05	2_Chondro
Ifrd1	1.20908e-09	0.468219	0.932	0.89	0.042	2.72224e-05	2_Chondro
Odc1	1.37404e-09	0.287067	0.937	0.887	0.05	3.09364e-05	2_Chondro
Sec61b	1.40509e-09	-0.248811	0.983	0.982	0.001	3.16355e-05	2_Chondro
Dlc1	1.41517e-09	-0.20068	0.69	0.765	-0.075	3.18625e-05	2_Chondro
Trp53	1.42128e-09	-0.222045	0.414	0.516	-0.102	3.20002e-05	2_Chondro
H3f3b	1.49609e-09	0.262918	1	1	0	3.36846e-05	2_Chondro
Lamb2	1.51672e-09	-0.200055	0.548	0.651	-0.103	3.41491e-05	2_Chondro
Hspa5	1.59135e-09	-0.333282	0.998	0.996	0.002	3.58292e-05	2_Chondro
St3gal6	1.59968e-09	-0.369895	0.46	0.557	-0.097	3.60168e-05	2_Chondro
Slc39a1	1.67458e-09	-0.213589	0.542	0.645	-0.103	3.77032e-05	2_Chondro
Dnajb14	2.21408e-09	-0.253354	0.485	0.594	-0.109	4.985e-05	2_Chondro
Bin1	2.5724e-09	-0.234833	0.405	0.502	-0.097	5.79176e-05	2_Chondro
Dusp5	2.69572e-09	0.356153	0.559	0.486	0.073	6.06942e-05	2_Chondro
Ptbp3	3.15733e-09	-0.216659	0.604	0.694	-0.09	7.10873e-05	2_Chondro
Ube2e3	3.5248e-09	-0.218746	0.668	0.753	-0.085	7.93609e-05	2_Chondro
Ptn	3.58476e-09	-0.612504	0.278	0.362	-0.084	8.07109e-05	2_Chondro
S100a10	3.8314e-09	0.27688	0.974	0.961	0.013	8.62639e-05	2_Chondro
R3hdm4	3.94171e-09	-0.200123	0.525	0.624	-0.099	8.87476e-05	2_Chondro
Ppp1r15a	4.11649e-09	-0.226907	0.705	0.782	-0.077	9.26829e-05	2_Chondro
Tmem50a	4.42254e-09	-0.215047	0.744	0.812	-0.068	9.95734e-05	2_Chondro
Id4	4.4679e-09	-0.386565	0.376	0.471	-0.095	0.000100595	2_Chondro
Arid4b	4.97768e-09	-0.213019	0.638	0.723	-0.085	0.000112073	2_Chondro
S100a4	5.19151e-09	-0.394975	0.229	0.328	-0.099	0.000116887	2_Chondro
Clk1	5.57201e-09	-0.206961	0.751	0.827	-0.076	0.000125454	2_Chondro
Slc20a1	6.15014e-09	0.268739	0.451	0.378	0.073	0.00013847	2_Chondro
Ankrd17	1.09665e-08	-0.223884	0.73	0.789	-0.059	0.00024691	2_Chondro
Stk39	1.23806e-08	-0.223803	0.476	0.532	-0.056	0.000278749	2_Chondro
Ube2h	1.27026e-08	-0.200924	0.501	0.59	-0.089	0.000286	2_Chondro
Rhob	1.53896e-08	0.269765	0.794	0.734	0.06	0.000346497	2_Chondro
Btg1	2.05151e-08	-0.236632	0.965	0.962	0.003	0.000461897	2_Chondro
Nrip1	2.13085e-08	-0.234086	0.382	0.489	-0.107	0.00047976	2_Chondro
Cd276	2.5329e-08	-0.223422	0.39	0.48	-0.09	0.000570283	2_Chondro
Hist1h1c	2.91214e-08	0.436792	0.692	0.62	0.072	0.000655669	2_Chondro
Smc4	4.49224e-08	-0.368073	0.453	0.522	-0.069	0.00101143	2_Chondro
Gadd45a	4.77538e-08	0.202337	0.513	0.431	0.082	0.00107518	2_Chondro
Col6a2	5.64311e-08	-0.401563	0.629	0.677	-0.048	0.00127055	2_Chondro
Fgfr1	5.70323e-08	-0.312784	0.743	0.762	-0.019	0.00128408	2_Chondro
Arrdc4	8.26431e-08	-0.276287	0.229	0.311	-0.082	0.00186071	2_Chondro
Vcam1	1.0031e-07	-0.717898	0.178	0.252	-0.074	0.00225848	2_Chondro
Gem	1.09778e-07	0.22895	0.22	0.147	0.073	0.00247165	2_Chondro
Homer1	1.10146e-07	0.291728	0.48	0.417	0.063	0.00247993	2_Chondro
Hnrnph1	1.45211e-07	-0.254579	0.92	0.943	-0.023	0.00326942	2_Chondro
Myc	1.70913e-07	0.234222	0.62	0.559	0.061	0.0038481	2_Chondro
Lmnb1	1.86401e-07	-0.22126	0.237	0.317	-0.08	0.00419682	2_Chondro
Fubp1	2.43099e-07	-0.200267	0.71	0.753	-0.043	0.00547337	2_Chondro
Ctsb	2.54218e-07	-0.303137	0.857	0.885	-0.028	0.00572373	2_Chondro
Tmx4	2.91672e-07	0.295068	0.435	0.373	0.062	0.006567	2_Chondro
Nono	5.17104e-07	-0.205408	0.715	0.781	-0.066	0.0116426	2_Chondro
Prkar1a	6.30671e-07	-0.225102	0.837	0.873	-0.036	0.0141996	2_Chondro
Eif4e	7.38463e-07	0.285627	0.815	0.764	0.051	0.0166265	2_Chondro
H2afx	8.2411e-07	-0.315054	0.368	0.449	-0.081	0.0185548	2_Chondro
Atf5	8.69889e-07	-0.204369	0.462	0.559	-0.097	0.0195855	2_Chondro
Grpel1	8.88876e-07	-0.209551	0.681	0.708	-0.027	0.020013	2_Chondro
Tmpo	1.0531e-06	-0.284244	0.361	0.43	-0.069	0.0237106	2_Chondro
Cks1b	1.14458e-06	-0.280929	0.46	0.526	-0.066	0.0257702	2_Chondro
Yod1	1.16985e-06	0.373234	0.416	0.355	0.061	0.0263391	2_Chondro
Arl6ip1	1.46022e-06	-0.240673	0.363	0.45	-0.087	0.0328768	2_Chondro
Apbb2	1.59295e-06	-0.23552	0.475	0.554	-0.079	0.0358653	2_Chondro
Maff	1.80057e-06	0.333871	0.596	0.531	0.065	0.0405399	2_Chondro
Prrc2c	2.23115e-06	-0.212952	0.815	0.864	-0.049	0.0502344	2_Chondro
Limch1	3.54582e-06	-1.1608	0.439	0.454	-0.015	0.0798342	2_Chondro
Fstl1	4.55388e-06	-1.38724	0.726	0.672	0.054	0.102531	2_Chondro
Nfia	6.86361e-06	-0.208766	0.425	0.492	-0.067	0.154534	2_Chondro
Chd3	8.22169e-06	-0.210167	0.591	0.669	-0.078	0.185111	2_Chondro
Arsi	8.43407e-06	0.235836	0.272	0.212	0.06	0.189893	2_Chondro
Selenoh	9.75967e-06	-0.261734	0.749	0.78	-0.031	0.219739	2_Chondro
Acta2	1.22144e-05	0.348327	0.217	0.149	0.068	0.275008	2_Chondro
Rad21	1.45718e-05	-0.219451	0.542	0.598	-0.056	0.328084	2_Chondro
H2afv	2.75813e-05	-0.35501	0.837	0.822	0.015	0.620992	2_Chondro
Tuba1c	3.76789e-05	-0.204084	0.78	0.793	-0.013	0.84834	2_Chondro
Ube2s	5.04759e-05	-0.250482	0.974	0.952	0.022	1	2_Chondro
Plaur	5.89391e-05	0.335568	0.395	0.357	0.038	1	2_Chondro
Psap	5.95663e-05	-0.210871	0.942	0.952	-0.01	1	2_Chondro
Clu	7.22014e-05	-0.218	0.22	0.281	-0.061	1	2_Chondro
Hist1h2ac	7.79306e-05	0.229578	0.349	0.282	0.067	1	2_Chondro
Klf3	8.27673e-05	0.266162	0.644	0.592	0.052	1	2_Chondro
Fcgrt	0.000122468	-0.236358	0.575	0.622	-0.047	1	2_Chondro
Cebpb	0.000135632	0.23165	0.837	0.824	0.013	1	2_Chondro
Ncam1	0.000152185	-0.292552	0.62	0.648	-0.028	1	2_Chondro
Gpm6b	0.000182822	-0.221239	0.218	0.275	-0.057	1	2_Chondro
Wnt4	0.000183053	-0.266189	0.617	0.641	-0.024	1	2_Chondro
Myl12a	0.000220668	-0.284577	0.952	0.958	-0.006	1	2_Chondro
Cdo1	0.000233152	-0.253049	0.243	0.293	-0.05	1	2_Chondro
Emp1	0.000438366	0.498695	0.857	0.874	-0.017	1	2_Chondro
Hmgb2	0.000472159	-0.75838	0.872	0.878	-0.006	1	2_Chondro
Apoe	0.000602938	-0.231645	0.389	0.323	0.066	1	2_Chondro
Col4a2	0.000724575	-0.562269	0.242	0.273	-0.031	1	2_Chondro
Dctn3	0.000734809	0.797207	0.753	0.749	0.004	1	2_Chondro
Cxcl1	0.000946211	0.581911	0.352	0.307	0.045	1	2_Chondro
Mest	0.00115414	-0.727119	0.655	0.637	0.018	1	2_Chondro
Timp2	0.00122862	-0.314198	0.895	0.893	0.002	1	2_Chondro
Faap20	0.00146864	0.218016	0.355	0.318	0.037	1	2_Chondro
Zfp36	0.00176347	0.202309	0.746	0.722	0.024	1	2_Chondro
Rin2	0.00267001	0.221476	0.431	0.401	0.03	1	2_Chondro
Ier3	0.00297494	0.441267	0.829	0.807	0.022	1	2_Chondro
Gm42418	0.00495202	-0.351365	1	1	0	1	2_Chondro
Sdc1	0.00500595	-0.235309	0.442	0.473	-0.031	1	2_Chondro
Dcn	0.0086188	-0.739266	0.939	0.844	0.095	1	2_Chondro

## Sheet: proliferating chondrocytes
gene	p_val	avg_log2FC	% in this cluster	% in all other cells	% difference	p_val_adj	cluster
Pbk	6.02102e-252	1.31474	0.878	0.069	0.809	1.35563e-247	3_Prolif
Ccna2	4.37774e-232	1.06421	0.851	0.074	0.777	9.85647e-228	3_Prolif
Cdca8	7.93495e-225	1.48621	0.941	0.106	0.835	1.78655e-220	3_Prolif
Hmmr	2.84271e-211	0.889007	0.745	0.055	0.69	6.40037e-207	3_Prolif
Tpx2	2.63446e-196	1.22042	0.878	0.105	0.773	5.9315e-192	3_Prolif
Depdc1a	1.70384e-193	0.555262	0.633	0.04	0.593	3.83619e-189	3_Prolif
Nuf2	7.52115e-191	0.502033	0.606	0.036	0.57	1.69339e-186	3_Prolif
Spc25	7.08853e-187	0.838394	0.723	0.064	0.659	1.59598e-182	3_Prolif
Aurkb	5.39235e-176	0.70955	0.654	0.053	0.601	1.21409e-171	3_Prolif
Racgap1	3.00362e-175	0.975081	0.851	0.107	0.744	6.76265e-171	3_Prolif
Birc5	1.39649e-170	1.81996	0.952	0.167	0.785	3.1442e-166	3_Prolif
Cdca3	1.73951e-170	1.59247	0.92	0.149	0.771	3.9165e-166	3_Prolif
Cenpe	1.09191e-168	0.949808	0.729	0.074	0.655	2.45845e-164	3_Prolif
Nusap1	1.43716e-168	1.13825	0.755	0.088	0.667	3.23576e-164	3_Prolif
Ckap2l	6.08916e-168	0.527262	0.633	0.05	0.583	1.37097e-163	3_Prolif
Mis18bp1	1.90666e-161	0.562318	0.58	0.043	0.537	4.29285e-157	3_Prolif
Esco2	1.20141e-160	0.693412	0.601	0.049	0.552	2.70498e-156	3_Prolif
Prc1	8.16625e-160	1.39254	0.787	0.108	0.679	1.83863e-155	3_Prolif
Cdca5	6.41596e-159	0.481557	0.574	0.043	0.531	1.44455e-154	3_Prolif
Kif4	1.18132e-156	0.490481	0.606	0.049	0.557	2.65975e-152	3_Prolif
Cenpf	9.86854e-156	1.41093	0.718	0.081	0.637	2.2219e-151	3_Prolif
Cdk1	6.25086e-154	1.70853	0.894	0.165	0.729	1.40738e-149	3_Prolif
Cdca2	1.38966e-152	0.406404	0.527	0.035	0.492	3.12881e-148	3_Prolif
Kif11	1.74503e-152	0.799858	0.691	0.075	0.616	3.92895e-148	3_Prolif
Cdc20	5.31444e-152	1.44477	0.824	0.122	0.702	1.19655e-147	3_Prolif
Anln	2.21407e-151	0.591995	0.654	0.064	0.59	4.98499e-147	3_Prolif
Pclaf	1.21733e-150	1.58604	0.835	0.125	0.71	2.74081e-146	3_Prolif
Knl1	3.01721e-150	0.624945	0.697	0.075	0.622	6.79325e-146	3_Prolif
Cdkn3	3.1242e-150	0.796182	0.734	0.088	0.646	7.03414e-146	3_Prolif
Ncapg	3.5015e-150	0.390548	0.58	0.046	0.534	7.88362e-146	3_Prolif
Lockd	1.36988e-149	1.12573	0.867	0.142	0.725	3.08427e-145	3_Prolif
Spc24	1.83725e-149	1.13528	0.936	0.177	0.759	4.13656e-145	3_Prolif
Cenpm	2.64366e-149	0.885251	0.862	0.139	0.723	5.9522e-145	3_Prolif
Bub1b	4.82748e-149	0.468103	0.585	0.049	0.536	1.08691e-144	3_Prolif
Diaph3	5.51858e-147	0.505683	0.622	0.059	0.563	1.24251e-142	3_Prolif
Ect2	1.33113e-145	0.459846	0.564	0.047	0.517	2.99703e-141	3_Prolif
Tacc3	5.52032e-145	1.01544	0.862	0.152	0.71	1.2429e-140	3_Prolif
Aurka	9.08376e-145	0.568092	0.537	0.042	0.495	2.04521e-140	3_Prolif
Sgo1	2.58189e-144	0.435207	0.548	0.044	0.504	5.81313e-140	3_Prolif
Melk	2.82275e-143	0.431947	0.564	0.046	0.518	6.35542e-139	3_Prolif
Hist1h1b	3.87699e-143	0.971591	0.59	0.056	0.534	8.72905e-139	3_Prolif
Top2a	4.23128e-142	1.91709	0.91	0.188	0.722	9.52673e-138	3_Prolif
Ccnb1	1.829e-141	0.892577	0.66	0.071	0.589	4.118e-137	3_Prolif
Neil3	3.19857e-141	0.43831	0.559	0.047	0.512	7.20159e-137	3_Prolif
Mki67	3.47206e-141	1.59557	0.92	0.192	0.728	7.81735e-137	3_Prolif
Kifc1	5.24414e-141	0.356554	0.521	0.039	0.482	1.18072e-136	3_Prolif
Kif22	8.92698e-141	0.555561	0.665	0.074	0.591	2.00991e-136	3_Prolif
Shcbp1	1.47882e-138	0.44557	0.601	0.056	0.545	3.32955e-134	3_Prolif
Iqgap3	2.68403e-138	0.38872	0.505	0.037	0.468	6.0431e-134	3_Prolif
Sgo2a	7.47606e-136	0.44587	0.521	0.042	0.479	1.68324e-131	3_Prolif
Knstrn	1.02659e-135	0.712078	0.681	0.081	0.6	2.31137e-131	3_Prolif
Nek2	1.17863e-135	0.416175	0.447	0.028	0.419	2.65368e-131	3_Prolif
Pimreg	2.47947e-134	0.423959	0.527	0.042	0.485	5.58253e-130	3_Prolif
Tk1	1.87145e-132	0.785632	0.707	0.093	0.614	4.21356e-128	3_Prolif
Arhgap11a	1.35709e-131	0.490293	0.644	0.073	0.571	3.05549e-127	3_Prolif
Ndc80	2.18699e-131	0.374385	0.516	0.042	0.474	4.924e-127	3_Prolif
Bub1	5.48873e-131	0.390893	0.564	0.051	0.513	1.23579e-126	3_Prolif
Kif15	6.63582e-131	0.510174	0.638	0.072	0.566	1.49406e-126	3_Prolif
Mybl1	2.3863e-130	0.385925	0.564	0.053	0.511	5.37276e-126	3_Prolif
E2f8	5.63113e-130	0.489607	0.559	0.054	0.505	1.26785e-125	3_Prolif
Incenp	9.89549e-130	0.791602	0.771	0.121	0.65	2.22797e-125	3_Prolif
Hist1h2ap	2.78444e-128	1.45801	0.729	0.116	0.613	6.26916e-124	3_Prolif
Ccnb2	1.7293e-126	0.973712	0.771	0.12	0.651	3.89351e-122	3_Prolif
Cenph	1.3123e-124	0.574655	0.691	0.092	0.599	2.95465e-120	3_Prolif
Ska1	5.15531e-123	0.346996	0.537	0.05	0.487	1.16072e-118	3_Prolif
Ube2c	1.34682e-122	1.63873	0.835	0.168	0.667	3.03237e-118	3_Prolif
Clspn	4.22239e-122	0.705123	0.638	0.081	0.557	9.5067e-118	3_Prolif
Rad51ap1	5.04388e-119	0.463711	0.532	0.053	0.479	1.13563e-114	3_Prolif
Trip13	5.03263e-117	0.398327	0.606	0.073	0.533	1.1331e-112	3_Prolif
Mad2l1	6.83665e-116	0.504511	0.745	0.117	0.628	1.53927e-111	3_Prolif
Mxd3	7.09213e-116	0.414474	0.489	0.043	0.446	1.59679e-111	3_Prolif
Asf1b	2.93281e-113	0.353665	0.521	0.052	0.469	6.60322e-109	3_Prolif
Ncapd2	6.81014e-113	0.549102	0.676	0.1	0.576	1.5333e-108	3_Prolif
Plk1	1.67761e-111	0.342373	0.426	0.033	0.393	3.77713e-107	3_Prolif
Cenpw	1.55745e-110	1.11553	0.941	0.296	0.645	3.50661e-106	3_Prolif
Smc2	1.94838e-110	1.17583	0.867	0.205	0.662	4.38679e-106	3_Prolif
Foxm1	5.55181e-110	0.386652	0.601	0.074	0.527	1.24999e-105	3_Prolif
Cenpp	1.50772e-108	0.448159	0.628	0.087	0.541	3.39463e-104	3_Prolif
Aspm	6.40641e-108	0.606255	0.569	0.069	0.5	1.4424e-103	3_Prolif
Stmn1	2.02081e-106	1.8109	0.984	0.359	0.625	4.54985e-102	3_Prolif
Kif23	2.01117e-105	0.744344	0.66	0.104	0.556	4.52815e-101	3_Prolif
Troap	2.63879e-105	0.229139	0.34	0.02	0.32	5.94125e-101	3_Prolif
Kif14	2.75747e-105	0.217116	0.351	0.021	0.33	6.20843e-101	3_Prolif
Spag5	1.63299e-104	0.380312	0.543	0.064	0.479	3.67667e-100	3_Prolif
Lmnb1	4.66826e-104	1.00737	0.904	0.256	0.648	1.05106e-99	3_Prolif
Gmnn	5.14851e-103	0.731253	0.718	0.132	0.586	1.15919e-98	3_Prolif
Cit	1.37616e-102	0.363235	0.473	0.048	0.425	3.09843e-98	3_Prolif
Cep55	1.98856e-102	0.20474	0.367	0.025	0.342	4.47723e-98	3_Prolif
C330027C09Rik	2.17475e-102	0.403449	0.59	0.078	0.512	4.89644e-98	3_Prolif
Cdc25c	1.06269e-101	0.240361	0.383	0.028	0.355	2.39264e-97	3_Prolif
Hmgb2	1.3969e-100	2.57126	1	0.869	0.131	3.14512e-96	3_Prolif
Kif20b	4.9087e-100	0.409009	0.479	0.051	0.428	1.10519e-95	3_Prolif
Cenps	1.37169e-98	0.384869	0.59	0.084	0.506	3.08837e-94	3_Prolif
Tedc1	1.01138e-97	0.334669	0.548	0.071	0.477	2.27712e-93	3_Prolif
Zfp367	3.48576e-97	0.711731	0.67	0.124	0.546	7.84818e-93	3_Prolif
Fignl1	1.48792e-95	0.243907	0.378	0.03	0.348	3.35006e-91	3_Prolif
Ube2t	1.36693e-93	0.353559	0.5	0.062	0.438	3.07764e-89	3_Prolif
Ckap2	1.79199e-93	0.49035	0.58	0.085	0.495	4.03466e-89	3_Prolif
Exo1	3.09404e-91	0.226522	0.346	0.026	0.32	6.96622e-87	3_Prolif
Smc4	4.12149e-91	1.38254	0.979	0.473	0.506	9.27953e-87	3_Prolif
Ccdc34	4.85736e-89	1.4923	0.995	0.653	0.342	1.09364e-84	3_Prolif
Cenpn	1.47595e-86	0.301932	0.484	0.061	0.423	3.3231e-82	3_Prolif
H2afz	1.06266e-85	1.67468	1	0.975	0.025	2.39257e-81	3_Prolif
Cenpa	3.83154e-85	1.50575	0.755	0.186	0.569	8.62671e-81	3_Prolif
Rrm2	8.58656e-83	0.994512	0.761	0.195	0.566	1.93326e-78	3_Prolif
Ncapg2	1.2637e-82	0.579449	0.665	0.132	0.533	2.84522e-78	3_Prolif
Rad51	2.04058e-82	0.335882	0.452	0.056	0.396	4.59437e-78	3_Prolif
Cenpi	3.33326e-82	0.206743	0.383	0.037	0.346	7.50483e-78	3_Prolif
Plk4	6.86584e-81	0.516232	0.734	0.17	0.564	1.54584e-76	3_Prolif
Rfc5	7.36359e-80	0.427506	0.707	0.153	0.554	1.65791e-75	3_Prolif
Nucks1	1.517e-79	1.20415	1	0.833	0.167	3.41553e-75	3_Prolif
Cks1b	1.04307e-78	1.06782	0.963	0.478	0.485	2.34848e-74	3_Prolif
Nrgn	1.05333e-78	0.336998	0.468	0.063	0.405	2.37157e-74	3_Prolif
Spdl1	1.61373e-78	0.201342	0.351	0.033	0.318	3.63332e-74	3_Prolif
Ncaph	2.30519e-78	0.248489	0.42	0.049	0.371	5.19014e-74	3_Prolif
Kif2c	6.98144e-78	0.226963	0.293	0.022	0.271	1.57187e-73	3_Prolif
Ube2s	1.48221e-77	1.44204	1	0.956	0.044	3.3372e-73	3_Prolif
Rrm1	3.16948e-77	0.965129	0.809	0.254	0.555	7.13607e-73	3_Prolif
Tuba1b	1.40843e-76	1.73423	0.984	0.82	0.164	3.17108e-72	3_Prolif
Ran	3.41256e-75	1.01806	1	0.939	0.061	7.68339e-71	3_Prolif
Kif20a	5.13997e-75	0.248264	0.367	0.039	0.328	1.15726e-70	3_Prolif
Rangap1	7.22032e-75	0.735365	0.91	0.307	0.603	1.62565e-70	3_Prolif
Fbxo5	1.01217e-74	0.280034	0.41	0.05	0.36	2.27889e-70	3_Prolif
Zgrf1	1.14593e-74	0.30166	0.521	0.083	0.438	2.58007e-70	3_Prolif
Kif26b	3.41026e-74	0.490544	0.601	0.122	0.479	7.6782e-70	3_Prolif
Dek	1.07466e-73	1.30773	1	0.821	0.179	2.4196e-69	3_Prolif
Anp32b	3.41238e-73	0.968415	1	0.935	0.065	7.68297e-69	3_Prolif
Nrm	4.02866e-72	0.660123	0.867	0.307	0.56	9.07053e-68	3_Prolif
H2afx	5.7451e-72	1.28281	0.899	0.396	0.503	1.29351e-67	3_Prolif
Hist1h2ae	2.11665e-71	0.506769	0.532	0.094	0.438	4.76563e-67	3_Prolif
Cenpk	3.09205e-71	0.348699	0.516	0.087	0.429	6.96174e-67	3_Prolif
Brca1	5.97804e-71	0.288667	0.42	0.057	0.363	1.34596e-66	3_Prolif
Ndc1	8.56477e-71	0.344384	0.713	0.163	0.55	1.92836e-66	3_Prolif
Tyms	2.95859e-70	0.694587	0.777	0.221	0.556	6.66126e-66	3_Prolif
Cdc45	4.32094e-70	0.32912	0.457	0.07	0.387	9.7286e-66	3_Prolif
Mybl2	4.64119e-70	0.30303	0.457	0.07	0.387	1.04496e-65	3_Prolif
Lsm3	1.35894e-69	0.848125	0.968	0.558	0.41	3.05964e-65	3_Prolif
Dlgap5	5.29695e-69	0.226905	0.335	0.035	0.3	1.19261e-64	3_Prolif
Pole	3.50498e-68	0.204062	0.383	0.047	0.336	7.89145e-64	3_Prolif
Mns1	5.81676e-68	0.238982	0.41	0.055	0.355	1.30964e-63	3_Prolif
Adhfe1	9.1986e-67	0.233408	0.362	0.044	0.318	2.07107e-62	3_Prolif
Dut	9.21715e-67	1.39624	0.947	0.674	0.273	2.07524e-62	3_Prolif
Mms22l	1.5342e-66	0.306337	0.532	0.096	0.436	3.45425e-62	3_Prolif
Cenpq	1.56795e-66	0.478298	0.739	0.196	0.543	3.53024e-62	3_Prolif
Tcf19	5.98484e-66	0.278148	0.436	0.065	0.371	1.34749e-61	3_Prolif
Dbf4	2.16932e-65	0.489499	0.681	0.167	0.514	4.88423e-61	3_Prolif
Psrc1	2.9562e-65	0.22097	0.356	0.042	0.314	6.65588e-61	3_Prolif
Dnajc9	8.35583e-65	0.802239	0.814	0.307	0.507	1.88132e-60	3_Prolif
Tmpo	9.52352e-65	0.781631	0.904	0.38	0.524	2.14422e-60	3_Prolif
Gins2	1.34686e-64	0.494446	0.644	0.157	0.487	3.03246e-60	3_Prolif
Hirip3	2.33637e-64	0.393012	0.638	0.148	0.49	5.26034e-60	3_Prolif
Fam111a	1.29401e-63	0.27661	0.399	0.057	0.342	2.91347e-59	3_Prolif
Mcm5	3.48137e-63	0.547945	0.628	0.151	0.477	7.8383e-59	3_Prolif
Uhrf1	1.33121e-62	0.429666	0.569	0.118	0.451	2.99721e-58	3_Prolif
H1fx	4.43738e-62	1.01406	0.883	0.34	0.543	9.99076e-58	3_Prolif
Cdc6	6.71226e-62	0.247298	0.324	0.038	0.286	1.51127e-57	3_Prolif
Vrk1	7.00625e-62	0.449543	0.713	0.205	0.508	1.57746e-57	3_Prolif
Tubb5	1.53792e-61	1.49075	0.984	0.882	0.102	3.46264e-57	3_Prolif
Nsd2	1.70557e-61	0.774274	0.84	0.348	0.492	3.84009e-57	3_Prolif
Bub3	1.72457e-61	0.935599	0.941	0.521	0.42	3.88286e-57	3_Prolif
Rpa2	7.6594e-61	0.707897	0.729	0.239	0.49	1.72451e-56	3_Prolif
Rfc4	3.25885e-60	0.414676	0.676	0.18	0.496	7.33731e-56	3_Prolif
Dhfr	4.52503e-60	0.519332	0.633	0.159	0.474	1.01881e-55	3_Prolif
Snrpd1	4.73284e-60	0.870169	0.995	0.877	0.118	1.0656e-55	3_Prolif
Anp32e	5.27534e-60	0.852274	0.979	0.676	0.303	1.18774e-55	3_Prolif
Lig1	6.08056e-59	0.817448	0.681	0.207	0.474	1.36904e-54	3_Prolif
Hmgb1	1.96742e-58	0.763668	1	0.985	0.015	4.42965e-54	3_Prolif
Dtl	8.25317e-58	0.48055	0.58	0.136	0.444	1.8582e-53	3_Prolif
E2f7	1.29293e-57	0.227687	0.309	0.036	0.273	2.91103e-53	3_Prolif
Nxt1	6.6594e-57	0.409682	0.617	0.159	0.458	1.49936e-52	3_Prolif
Rad21	2.54312e-56	0.922991	0.926	0.561	0.365	5.72584e-52	3_Prolif
Sytl2	9.01344e-56	0.674501	0.729	0.24	0.489	2.02938e-51	3_Prolif
Cenpl	1.66374e-54	0.28167	0.415	0.073	0.342	3.74591e-50	3_Prolif
Selenoh	2.26415e-54	0.77104	0.984	0.757	0.227	5.09773e-50	3_Prolif
Pmf1	3.42023e-54	0.441565	0.75	0.244	0.506	7.70066e-50	3_Prolif
Cks2	1.41234e-53	1.16727	0.931	0.518	0.413	3.17989e-49	3_Prolif
Brip1os	2.05624e-53	0.364175	0.66	0.177	0.483	4.62963e-49	3_Prolif
Hjurp	2.15716e-53	0.778787	0.83	0.369	0.461	4.85685e-49	3_Prolif
Prelp	3.35176e-53	1.15652	1	0.611	0.389	7.5465e-49	3_Prolif
Gas2l3	4.31737e-53	0.481902	0.505	0.118	0.387	9.72056e-49	3_Prolif
Hist1h1d	1.03522e-52	0.252418	0.282	0.034	0.248	2.3308e-48	3_Prolif
Atad2	2.70592e-52	0.656992	0.686	0.223	0.463	6.09238e-48	3_Prolif
Pold3	4.97834e-52	0.400977	0.569	0.148	0.421	1.12087e-47	3_Prolif
Prim1	5.45976e-52	0.316999	0.559	0.131	0.428	1.22926e-47	3_Prolif
Hmgn2	8.04595e-52	0.846395	0.979	0.739	0.24	1.81154e-47	3_Prolif
Psmc3ip	8.36321e-52	0.284943	0.495	0.107	0.388	1.88298e-47	3_Prolif
Cdkn2c	1.77781e-51	0.59448	0.702	0.242	0.46	4.00275e-47	3_Prolif
H2-Q7	2.87062e-51	0.517867	0.739	0.248	0.491	6.4632e-47	3_Prolif
1810037I17Rik	2.16138e-50	0.848909	0.973	0.799	0.174	4.86635e-46	3_Prolif
Mis12	4.70704e-50	0.201155	0.399	0.071	0.328	1.05979e-45	3_Prolif
Atad5	9.70761e-50	0.272697	0.436	0.086	0.35	2.18567e-45	3_Prolif
Nap1l1	3.58324e-49	0.77233	0.995	0.915	0.08	8.06767e-45	3_Prolif
Usp1	9.35907e-49	0.527591	0.777	0.293	0.484	2.10719e-44	3_Prolif
Sh2d3c	1.70483e-48	0.21107	0.298	0.041	0.257	3.83842e-44	3_Prolif
Rad18	2.91334e-48	0.27767	0.532	0.128	0.404	6.55939e-44	3_Prolif
Tipin	3.14911e-48	0.845463	0.888	0.528	0.36	7.09023e-44	3_Prolif
Prickle1	3.11791e-47	0.468237	0.761	0.283	0.478	7.01996e-43	3_Prolif
Lbr	3.53108e-47	0.541054	0.867	0.395	0.472	7.95022e-43	3_Prolif
Hist1h4i	4.59636e-47	0.460608	0.665	0.208	0.457	1.03487e-42	3_Prolif
Hells	1.38434e-46	0.313312	0.495	0.113	0.382	3.11684e-42	3_Prolif
Itm2b	1.6438e-46	-1.38562	0.979	0.981	-0.002	3.70102e-42	3_Prolif
H2-Q6	1.71668e-46	0.239721	0.415	0.084	0.331	3.8651e-42	3_Prolif
Ezh2	1.7011e-45	0.454749	0.702	0.232	0.47	3.83004e-41	3_Prolif
Nde1	2.06721e-45	0.443588	0.713	0.251	0.462	4.65432e-41	3_Prolif
Lsm6	2.74251e-45	0.650484	0.963	0.739	0.224	6.17476e-41	3_Prolif
Fam83d	6.66639e-45	0.225107	0.34	0.058	0.282	1.50094e-40	3_Prolif
Ptma	6.73707e-45	0.653892	0.995	0.999	-0.004	1.51685e-40	3_Prolif
Ncapd3	1.86409e-44	0.300253	0.511	0.129	0.382	4.197e-40	3_Prolif
Ppia	7.10134e-44	0.497897	1	0.996	0.004	1.59887e-39	3_Prolif
Mis18a	1.10022e-43	0.216403	0.489	0.114	0.375	2.47715e-39	3_Prolif
Sox11	1.3504e-43	0.51806	0.931	0.401	0.53	3.04041e-39	3_Prolif
Ssrp1	1.51535e-43	0.698004	0.957	0.68	0.277	3.41182e-39	3_Prolif
Skp2	1.53292e-43	0.283274	0.495	0.123	0.372	3.45136e-39	3_Prolif
Mcm3	1.58628e-43	0.554864	0.601	0.194	0.407	3.5715e-39	3_Prolif
Pkmyt1	1.79296e-43	0.205286	0.447	0.099	0.348	4.03684e-39	3_Prolif
Pcnt	2.92483e-43	0.282822	0.59	0.167	0.423	6.58526e-39	3_Prolif
Tubb4b	7.46631e-43	1.24987	0.989	0.799	0.19	1.68104e-38	3_Prolif
Chaf1a	2.00672e-42	0.263542	0.426	0.094	0.332	4.51813e-38	3_Prolif
G2e3	2.82602e-42	0.326341	0.441	0.103	0.338	6.36278e-38	3_Prolif
Exosc8	4.07979e-42	0.409761	0.782	0.31	0.472	9.18565e-38	3_Prolif
Haus4	4.87039e-42	0.293518	0.495	0.124	0.371	1.09657e-37	3_Prolif
Mcm7	1.30342e-41	0.485422	0.739	0.284	0.455	2.93466e-37	3_Prolif
Rfwd3	2.46373e-41	0.238648	0.5	0.126	0.374	5.54708e-37	3_Prolif
Fen1	3.09618e-41	0.321524	0.559	0.162	0.397	6.97105e-37	3_Prolif
Cbx3	4.23833e-41	0.675254	0.995	0.886	0.109	9.5426e-37	3_Prolif
Cep295	8.13136e-41	0.297904	0.58	0.173	0.407	1.83077e-36	3_Prolif
Ctsz	1.04915e-40	0.774489	0.995	0.952	0.043	2.36216e-36	3_Prolif
Tubg1	1.92454e-40	0.264714	0.596	0.18	0.416	4.33309e-36	3_Prolif
Ckap5	2.33624e-40	0.516397	0.771	0.33	0.441	5.26005e-36	3_Prolif
Lsm2	3.50721e-40	0.570129	0.851	0.483	0.368	7.89649e-36	3_Prolif
H2afv	4.17423e-40	0.795578	0.989	0.816	0.173	9.39827e-36	3_Prolif
Cd63	4.45309e-40	-1.12979	1	0.998	0.002	1.00261e-35	3_Prolif
Hat1	5.47173e-40	0.510563	0.771	0.333	0.438	1.23196e-35	3_Prolif
Dctpp1	8.3989e-40	0.674516	0.867	0.484	0.383	1.89101e-35	3_Prolif
Cep89	1.29016e-39	0.242584	0.362	0.076	0.286	2.9048e-35	3_Prolif
Orc6	1.66586e-39	0.589978	0.771	0.356	0.415	3.75068e-35	3_Prolif
Srsf3	1.75333e-39	0.595714	1	0.976	0.024	3.94763e-35	3_Prolif
Nup85	2.12212e-39	0.282088	0.58	0.179	0.401	4.77795e-35	3_Prolif
Etaa1	2.28428e-39	0.201265	0.404	0.091	0.313	5.14305e-35	3_Prolif
Brca2	4.21135e-39	0.24732	0.431	0.102	0.329	9.48185e-35	3_Prolif
Dtymk	4.69452e-39	0.749268	0.926	0.706	0.22	1.05697e-34	3_Prolif
Ccne2	5.29691e-39	0.291734	0.378	0.084	0.294	1.1926e-34	3_Prolif
Angptl2	6.31141e-39	0.617342	0.979	0.585	0.394	1.42101e-34	3_Prolif
Alyref	6.37242e-39	0.625052	0.957	0.712	0.245	1.43475e-34	3_Prolif
Hist1h1e	7.40514e-39	0.591463	0.638	0.245	0.393	1.66727e-34	3_Prolif
Pold2	8.29025e-39	0.301486	0.665	0.233	0.432	1.86655e-34	3_Prolif
Pgam1	1.26575e-38	0.80981	1	0.896	0.104	2.84985e-34	3_Prolif
Dnph1	2.22878e-38	0.26996	0.5	0.138	0.362	5.0181e-34	3_Prolif
Cep192	2.57172e-38	0.260763	0.532	0.148	0.384	5.79022e-34	3_Prolif
Hdgf	3.06581e-38	0.618432	0.989	0.841	0.148	6.90268e-34	3_Prolif
Dnmt1	6.88066e-38	0.451294	0.606	0.215	0.391	1.54918e-33	3_Prolif
Cmc2	8.58915e-38	0.402247	0.734	0.308	0.426	1.93385e-33	3_Prolif
Ccne1	8.64415e-38	0.300183	0.431	0.108	0.323	1.94623e-33	3_Prolif
Siva1	1.19557e-37	0.727547	0.947	0.69	0.257	2.69183e-33	3_Prolif
Myl6	2.16177e-37	-0.861757	0.995	0.992	0.003	4.86724e-33	3_Prolif
Topbp1	9.7063e-37	0.370129	0.676	0.237	0.439	2.18537e-32	3_Prolif
Snrpe	1.38895e-36	0.54789	0.995	0.948	0.047	3.12723e-32	3_Prolif
Syce2	1.41376e-36	0.303432	0.66	0.221	0.439	3.18307e-32	3_Prolif
Pcolce2	2.27597e-36	0.809861	1	0.679	0.321	5.12435e-32	3_Prolif
Cdkn2d	3.07626e-36	0.592314	0.782	0.375	0.407	6.92621e-32	3_Prolif
Ybx1	9.62536e-36	0.463959	1	0.99	0.01	2.16715e-31	3_Prolif
Chaf1b	1.09175e-35	0.280465	0.404	0.099	0.305	2.45808e-31	3_Prolif
Ranbp1	3.83231e-35	0.727488	0.963	0.893	0.07	8.62845e-31	3_Prolif
Tmem107	6.26957e-35	0.379745	0.84	0.39	0.45	1.41159e-30	3_Prolif
Pgp	9.20381e-35	0.465915	0.904	0.49	0.414	2.07224e-30	3_Prolif
Ywhah	1.19091e-34	0.639414	0.957	0.63	0.327	2.68134e-30	3_Prolif
Mcm10	2.07042e-34	0.209132	0.479	0.133	0.346	4.66156e-30	3_Prolif
Fam162a	2.30657e-34	0.838699	1	0.82	0.18	5.19325e-30	3_Prolif
Dpy30	4.13961e-34	0.475162	0.92	0.567	0.353	9.32033e-30	3_Prolif
St3gal4	4.99457e-34	0.485136	0.915	0.49	0.425	1.12453e-29	3_Prolif
Nt5dc2	5.80493e-34	0.548645	0.989	0.806	0.183	1.30698e-29	3_Prolif
Poc1a	1.0126e-33	0.227556	0.447	0.121	0.326	2.27986e-29	3_Prolif
Mcm4	1.22776e-33	0.3162	0.58	0.189	0.391	2.7643e-29	3_Prolif
Cse1l	2.14059e-33	0.232665	0.606	0.202	0.404	4.81953e-29	3_Prolif
E2f1	2.64879e-33	0.345528	0.484	0.152	0.332	5.96375e-29	3_Prolif
Col5a1	5.11445e-33	-1.51423	0.41	0.705	-0.295	1.15152e-28	3_Prolif
Hmgn1	8.0099e-33	0.471463	0.995	0.969	0.026	1.80343e-28	3_Prolif
Mcm2	9.49949e-33	0.3995	0.532	0.179	0.353	2.13881e-28	3_Prolif
Hnrnpab	1.05168e-32	0.500039	1	0.946	0.054	2.36785e-28	3_Prolif
Lingo1	1.1877e-32	0.255024	0.543	0.17	0.373	2.6741e-28	3_Prolif
Cd24a	1.32152e-32	0.768775	0.984	0.696	0.288	2.9754e-28	3_Prolif
Mcm6	1.5911e-32	0.51231	0.585	0.227	0.358	3.58236e-28	3_Prolif
Haus1	1.59202e-32	0.308476	0.633	0.24	0.393	3.58444e-28	3_Prolif
Tpi1	1.98369e-32	0.764931	1	0.897	0.103	4.46627e-28	3_Prolif
Bex2	2.01234e-32	0.325485	0.388	0.099	0.289	4.53079e-28	3_Prolif
Fbln7	2.19399e-32	0.544028	0.968	0.522	0.446	4.93976e-28	3_Prolif
Mzt1	3.02481e-32	0.500558	0.952	0.574	0.378	6.81037e-28	3_Prolif
Slbp	3.73047e-32	0.686455	0.883	0.602	0.281	8.39915e-28	3_Prolif
Col5a2	5.11594e-32	-2.34858	0.41	0.707	-0.297	1.15185e-27	3_Prolif
Ctsl	5.24379e-32	-1.11966	0.612	0.807	-0.195	1.18064e-27	3_Prolif
Anapc15	5.4323e-32	0.354097	0.707	0.311	0.396	1.22308e-27	3_Prolif
Prim2	6.57447e-32	0.242478	0.468	0.144	0.324	1.48024e-27	3_Prolif
Mgp	9.17734e-32	0.543279	0.995	0.808	0.187	2.06628e-27	3_Prolif
C4b	1.00483e-31	0.608138	0.936	0.52	0.416	2.26237e-27	3_Prolif
Tsen15	1.00809e-31	0.312947	0.713	0.297	0.416	2.2697e-27	3_Prolif
Dynlt1f	1.16968e-31	0.366153	0.766	0.359	0.407	2.63354e-27	3_Prolif
Smc3	1.89651e-31	0.53592	0.92	0.678	0.242	4.27e-27	3_Prolif
Mrpl18	2.18374e-31	0.474113	0.926	0.62	0.306	4.91669e-27	3_Prolif
Gm973	3.58233e-31	0.326437	0.601	0.225	0.376	8.06561e-27	3_Prolif
Matn3	5.10863e-31	0.833949	1	0.75	0.25	1.15021e-26	3_Prolif
Blm	7.66155e-31	0.223079	0.484	0.152	0.332	1.725e-26	3_Prolif
Rpa3	1.13266e-30	0.47639	0.878	0.545	0.333	2.55019e-26	3_Prolif
Fn1	1.19065e-30	-1.57575	0.984	0.988	-0.004	2.68074e-26	3_Prolif
Bex3	1.23576e-30	0.531119	0.979	0.794	0.185	2.78231e-26	3_Prolif
Paics	1.24102e-30	0.540999	0.989	0.705	0.284	2.79417e-26	3_Prolif
Ppih	1.35023e-30	0.264593	0.676	0.266	0.41	3.04005e-26	3_Prolif
Runx3	1.70299e-30	0.540809	0.936	0.58	0.356	3.83427e-26	3_Prolif
C1qtnf3	1.84164e-30	0.821627	1	0.618	0.382	4.14646e-26	3_Prolif
Med9	2.88785e-30	0.403549	0.878	0.485	0.393	6.502e-26	3_Prolif
Mthfd2	4.09935e-30	0.574675	0.963	0.668	0.295	9.22968e-26	3_Prolif
Gdf10	4.31535e-30	0.621061	0.904	0.503	0.401	9.71601e-26	3_Prolif
Hnrnpa2b1	5.82214e-30	0.453285	1	0.982	0.018	1.31085e-25	3_Prolif
Ak2	5.87572e-30	0.53961	0.947	0.666	0.281	1.32292e-25	3_Prolif
Cdca4	9.07254e-30	0.238842	0.511	0.17	0.341	2.04268e-25	3_Prolif
Ucma	9.45722e-30	0.505517	1	0.601	0.399	2.12929e-25	3_Prolif
Scrg1	1.23486e-29	0.709612	1	0.581	0.419	2.78029e-25	3_Prolif
Ftl1	1.36626e-29	-0.679852	1	0.997	0.003	3.07613e-25	3_Prolif
Epyc	1.64927e-29	0.801018	1	0.638	0.362	3.71332e-25	3_Prolif
Slc16a3	1.74103e-29	0.60077	0.915	0.493	0.422	3.91992e-25	3_Prolif
Vbp1	2.02596e-29	0.472939	0.926	0.588	0.338	4.56144e-25	3_Prolif
Plod2	2.46692e-29	0.581124	1	0.921	0.079	5.55428e-25	3_Prolif
Tfdp1	2.68945e-29	0.456503	0.83	0.452	0.378	6.0553e-25	3_Prolif
Tnnt3	3.03132e-29	0.439197	0.606	0.227	0.379	6.82502e-25	3_Prolif
Pgk1	3.33234e-29	0.786281	1	0.876	0.124	7.50276e-25	3_Prolif
Sumo2	4.48576e-29	0.522793	0.995	0.956	0.039	1.00997e-24	3_Prolif
Nudc	4.85916e-29	0.504907	0.957	0.764	0.193	1.09404e-24	3_Prolif
Arl6ip1	4.96308e-29	0.779264	0.761	0.405	0.356	1.11744e-24	3_Prolif
Msmo1	6.59113e-29	0.618437	0.963	0.624	0.339	1.48399e-24	3_Prolif
Acat2	6.91899e-29	0.378393	0.734	0.331	0.403	1.55781e-24	3_Prolif
Serpine2	9.29827e-29	-3.38785	0.223	0.574	-0.351	2.09351e-24	3_Prolif
mt-Co1	1.0263e-28	-0.860808	1	1	0	2.31072e-24	3_Prolif
Sox5	1.07522e-28	0.514688	0.979	0.555	0.424	2.42086e-24	3_Prolif
Mxd4	1.22686e-28	-0.830744	0.606	0.79	-0.184	2.76227e-24	3_Prolif
Snrpf	1.29932e-28	0.422283	1	0.934	0.066	2.92543e-24	3_Prolif
Trim59	1.34249e-28	0.27112	0.543	0.19	0.353	3.02262e-24	3_Prolif
Rnaseh2c	1.67267e-28	0.395629	0.931	0.548	0.383	3.76602e-24	3_Prolif
Set	1.90142e-28	0.488215	1	0.938	0.062	4.28105e-24	3_Prolif
Id1	1.97343e-28	0.727295	0.947	0.589	0.358	4.44317e-24	3_Prolif
Mcoln2	2.25918e-28	0.259755	0.553	0.198	0.355	5.08654e-24	3_Prolif
Lsm8	2.59151e-28	0.489191	0.888	0.597	0.291	5.83479e-24	3_Prolif
Arl4c	3.3725e-28	0.279429	0.686	0.283	0.403	7.59318e-24	3_Prolif
Myef2	3.98756e-28	0.318604	0.676	0.289	0.387	8.978e-24	3_Prolif
Rbm3	4.1072e-28	0.341916	1	0.991	0.009	9.24737e-24	3_Prolif
Ruvbl2	4.1124e-28	0.326253	0.739	0.332	0.407	9.25907e-24	3_Prolif
Cep57	4.31559e-28	0.224609	0.537	0.186	0.351	9.71655e-24	3_Prolif
Nqo1	4.31771e-28	0.225031	0.564	0.201	0.363	9.72132e-24	3_Prolif
Nudt21	4.79473e-28	0.468448	0.941	0.708	0.233	1.07953e-23	3_Prolif
H2-DMb1	4.90952e-28	0.629776	0.888	0.48	0.408	1.10538e-23	3_Prolif
Fam216a	5.34981e-28	0.269573	0.601	0.233	0.368	1.20451e-23	3_Prolif
Idi1	5.6927e-28	0.565044	0.936	0.602	0.334	1.28171e-23	3_Prolif
Il17b	6.27164e-28	0.544223	0.888	0.431	0.457	1.41206e-23	3_Prolif
Hspa14	6.7676e-28	0.351849	0.755	0.366	0.389	1.52373e-23	3_Prolif
Stard4	9.23024e-28	0.364845	0.862	0.444	0.418	2.07819e-23	3_Prolif
Fabp7	1.13536e-27	0.407142	0.723	0.306	0.417	2.55627e-23	3_Prolif
Spata24	1.35776e-27	0.272184	0.633	0.265	0.368	3.05699e-23	3_Prolif
Scd2	1.37487e-27	0.778379	1	0.838	0.162	3.09552e-23	3_Prolif
Alpl	1.54232e-27	-2.04822	0.261	0.59	-0.329	3.47254e-23	3_Prolif
Smchd1	1.79461e-27	0.421651	0.894	0.529	0.365	4.04056e-23	3_Prolif
Cep85	1.8695e-27	0.21046	0.564	0.199	0.365	4.20918e-23	3_Prolif
Tpst1	1.92424e-27	0.214285	0.633	0.237	0.396	4.33242e-23	3_Prolif
Rfc3	2.03175e-27	0.324297	0.559	0.21	0.349	4.57448e-23	3_Prolif
Npm1	2.38785e-27	0.46459	1	0.996	0.004	5.37625e-23	3_Prolif
Hsp90aa1	2.45422e-27	0.436207	1	0.99	0.01	5.52569e-23	3_Prolif
Kpna2	3.13542e-27	0.244358	0.346	0.094	0.252	7.05939e-23	3_Prolif
Ctcf	3.63806e-27	0.438963	0.793	0.437	0.356	8.19108e-23	3_Prolif
Tst	4.35134e-27	0.208175	0.505	0.167	0.338	9.79705e-23	3_Prolif
2810001G20Rik	4.46153e-27	0.377378	0.83	0.41	0.42	1.00451e-22	3_Prolif
Colgalt2	5.17628e-27	0.4318	0.947	0.507	0.44	1.16544e-22	3_Prolif
Mif	5.28192e-27	0.691402	1	0.953	0.047	1.18922e-22	3_Prolif
Efcab1	6.43372e-27	0.329928	0.819	0.392	0.427	1.44855e-22	3_Prolif
Rbmx2	6.51092e-27	0.212411	0.527	0.184	0.343	1.46593e-22	3_Prolif
Jpt2	7.49194e-27	0.33312	0.729	0.352	0.377	1.68681e-22	3_Prolif
Snai2	8.58025e-27	0.408382	0.793	0.403	0.39	1.93184e-22	3_Prolif
Fdps	9.6945e-27	0.631099	0.984	0.7	0.284	2.18272e-22	3_Prolif
Snrnp25	9.8413e-27	0.282677	0.734	0.325	0.409	2.21577e-22	3_Prolif
Nop10	1.01188e-26	0.488272	0.973	0.838	0.135	2.27824e-22	3_Prolif
Susd5	1.10643e-26	0.596975	0.979	0.606	0.373	2.49112e-22	3_Prolif
Nsmce4a	1.18402e-26	0.369213	0.814	0.434	0.38	2.66582e-22	3_Prolif
Smc6	1.40117e-26	0.551665	0.926	0.709	0.217	3.15474e-22	3_Prolif
Gapdh	1.63546e-26	0.562238	1	0.994	0.006	3.68224e-22	3_Prolif
Cbx5	1.6908e-26	0.386013	0.888	0.507	0.381	3.80683e-22	3_Prolif
Sox8	1.94287e-26	0.290087	0.67	0.275	0.395	4.37438e-22	3_Prolif
Snrpg	2.76127e-26	0.416286	0.995	0.92	0.075	6.21699e-22	3_Prolif
Pak4	2.78295e-26	0.206908	0.473	0.16	0.313	6.26582e-22	3_Prolif
Tmsb10	2.93317e-26	-1.19722	0.979	0.962	0.017	6.60403e-22	3_Prolif
Eno1	2.98913e-26	0.586852	1	0.831	0.169	6.73002e-22	3_Prolif
Hmgcr	3.00885e-26	0.611238	0.947	0.7	0.247	6.77443e-22	3_Prolif
Fdft1	4.97472e-26	0.366207	0.856	0.444	0.412	1.12006e-21	3_Prolif
Rbbp7	5.16377e-26	0.442626	0.984	0.817	0.167	1.16262e-21	3_Prolif
Stk26	5.26993e-26	0.445263	0.91	0.492	0.418	1.18652e-21	3_Prolif
Pcna	5.40898e-26	0.528061	0.787	0.486	0.301	1.21783e-21	3_Prolif
Cdt1	5.76997e-26	0.304448	0.543	0.209	0.334	1.29911e-21	3_Prolif
Rps24	6.35553e-26	0.338035	1	1	0	1.43095e-21	3_Prolif
Tmem176b	6.42761e-26	-1.19149	0.766	0.836	-0.07	1.44718e-21	3_Prolif
Fxyd6	6.4854e-26	0.481773	0.91	0.513	0.397	1.46019e-21	3_Prolif
Cox7c	8.04664e-26	0.354181	1	0.985	0.015	1.8117e-21	3_Prolif
Slc26a2	9.94255e-26	0.569271	0.984	0.698	0.286	2.23857e-21	3_Prolif
Tcp1	9.95868e-26	0.44125	0.995	0.889	0.106	2.2422e-21	3_Prolif
Sae1	1.61001e-25	0.375008	0.878	0.492	0.386	3.62493e-21	3_Prolif
40422	1.67667e-25	0.203122	0.505	0.178	0.327	3.77503e-21	3_Prolif
9530059O14Rik	1.80657e-25	0.22656	0.511	0.181	0.33	4.06749e-21	3_Prolif
Id2	2.71724e-25	0.588836	0.952	0.698	0.254	6.11787e-21	3_Prolif
Ppat	2.96913e-25	0.318017	0.649	0.292	0.357	6.68501e-21	3_Prolif
Fam76b	3.20417e-25	0.228292	0.617	0.241	0.376	7.2142e-21	3_Prolif
mt-Co3	4.1456e-25	-0.789139	1	1	0	9.33383e-21	3_Prolif
Sc5d	4.43856e-25	0.400438	0.878	0.497	0.381	9.99343e-21	3_Prolif
Prune2	5.36822e-25	0.309918	0.527	0.207	0.32	1.20865e-20	3_Prolif
Eri1	6.0018e-25	0.327735	0.553	0.226	0.327	1.35131e-20	3_Prolif
Dact3	6.51791e-25	0.249319	0.585	0.234	0.351	1.46751e-20	3_Prolif
Ppm1g	7.08468e-25	0.348199	0.846	0.463	0.383	1.59512e-20	3_Prolif
Car12	1.54391e-24	0.412901	0.739	0.349	0.39	3.4761e-20	3_Prolif
Fap	1.83994e-24	-1.22588	0.048	0.423	-0.375	4.14263e-20	3_Prolif
Bmp1	1.90844e-24	-1.31501	0.585	0.741	-0.156	4.29685e-20	3_Prolif
Thbs3	1.96864e-24	0.458212	0.989	0.672	0.317	4.4324e-20	3_Prolif
Srrm1	2.37315e-24	0.452025	0.979	0.827	0.152	5.34314e-20	3_Prolif
Mrpl51	2.41976e-24	0.409066	0.926	0.666	0.26	5.44809e-20	3_Prolif
Cntln	2.53286e-24	0.27443	0.543	0.207	0.336	5.70273e-20	3_Prolif
Col12a1	2.71547e-24	-1.66397	0.617	0.789	-0.172	6.11388e-20	3_Prolif
Ckb	4.26473e-24	-1.31862	0.298	0.592	-0.294	9.60205e-20	3_Prolif
Rpa1	4.64746e-24	0.262337	0.5	0.191	0.309	1.04638e-19	3_Prolif
Sdc4	5.53408e-24	0.552329	1	0.918	0.082	1.246e-19	3_Prolif
Tmem59	5.54222e-24	-0.827508	0.989	0.979	0.01	1.24783e-19	3_Prolif
Cenpx	6.5521e-24	0.392275	0.91	0.595	0.315	1.47521e-19	3_Prolif
Cdh11	6.90936e-24	-1.55527	0.064	0.428	-0.364	1.55564e-19	3_Prolif
Higd1a	7.96368e-24	0.620616	1	0.912	0.088	1.79302e-19	3_Prolif
Naa50	9.31005e-24	0.431762	0.941	0.711	0.23	2.09616e-19	3_Prolif
Hnrnpa1	1.33128e-23	0.411178	0.995	0.973	0.022	2.99737e-19	3_Prolif
Nelfe	1.41356e-23	0.385093	0.766	0.444	0.322	3.18264e-19	3_Prolif
Cfh	1.45491e-23	-2.27306	0.101	0.453	-0.352	3.27574e-19	3_Prolif
Col1a2	1.51869e-23	-3.76224	0.995	0.995	0	3.41933e-19	3_Prolif
Lgals1	1.56765e-23	-2.12488	0.33	0.615	-0.285	3.52955e-19	3_Prolif
Zfand5	1.7909e-23	-0.765908	0.888	0.919	-0.031	4.03221e-19	3_Prolif
Tiam1	1.8277e-23	0.233061	0.638	0.267	0.371	4.11506e-19	3_Prolif
Eef1b2	2.03187e-23	0.337575	1	0.996	0.004	4.57476e-19	3_Prolif
Xrcc1	2.14699e-23	0.216806	0.628	0.262	0.366	4.83395e-19	3_Prolif
Ube2i	3.43304e-23	0.40124	0.973	0.886	0.087	7.72948e-19	3_Prolif
Cpe	3.53827e-23	-0.882068	0.984	0.939	0.045	7.96641e-19	3_Prolif
Odf2	3.67665e-23	0.32103	0.697	0.346	0.351	8.27799e-19	3_Prolif
Batf3	3.91999e-23	0.473461	0.713	0.37	0.343	8.82585e-19	3_Prolif
Larp7	3.92381e-23	0.306031	0.803	0.441	0.362	8.83446e-19	3_Prolif
Suz12	4.29502e-23	0.347997	0.766	0.407	0.359	9.67025e-19	3_Prolif
Ncaph2	4.72831e-23	0.330654	0.814	0.442	0.372	1.06458e-18	3_Prolif
Hmgcs1	7.09476e-23	0.568625	0.968	0.761	0.207	1.59738e-18	3_Prolif
Erg28	7.53515e-23	0.373834	0.862	0.506	0.356	1.69654e-18	3_Prolif
Fgfr3	7.83213e-23	0.500399	0.989	0.714	0.275	1.7634e-18	3_Prolif
Thoc7	9.33001e-23	0.407763	0.979	0.821	0.158	2.10065e-18	3_Prolif
Smpdl3b	9.63859e-23	0.264948	0.638	0.287	0.351	2.17013e-18	3_Prolif
Rfc2	1.00885e-22	0.353527	0.718	0.368	0.35	2.27143e-18	3_Prolif
S100a11	1.102e-22	-0.735027	0.995	0.973	0.022	2.48116e-18	3_Prolif
Srsf7	1.18616e-22	0.427496	0.984	0.838	0.146	2.67064e-18	3_Prolif
Srsf1	1.34732e-22	0.363644	0.947	0.664	0.283	3.03348e-18	3_Prolif
Bnip3	1.55034e-22	0.478285	0.984	0.598	0.386	3.4906e-18	3_Prolif
Cst3	1.72378e-22	-0.725442	0.989	0.99	-0.001	3.8811e-18	3_Prolif
Elovl5	2.0796e-22	0.251355	0.676	0.3	0.376	4.68222e-18	3_Prolif
Col1a1	2.16228e-22	-4.55051	0.91	0.946	-0.036	4.86838e-18	3_Prolif
Pknox1	2.29019e-22	0.221852	0.527	0.205	0.322	5.15637e-18	3_Prolif
Wwp2	2.37571e-22	0.558758	0.995	0.752	0.243	5.34891e-18	3_Prolif
Egln1	2.45141e-22	0.54263	0.936	0.679	0.257	5.51934e-18	3_Prolif
Baz1b	2.52806e-22	0.309401	0.745	0.374	0.371	5.69193e-18	3_Prolif
Piezo2	2.5419e-22	0.220958	0.569	0.228	0.341	5.7231e-18	3_Prolif
Lrig3	2.60107e-22	0.205088	0.548	0.222	0.326	5.8563e-18	3_Prolif
AC160336.1	2.65799e-22	0.408031	0.628	0.284	0.344	5.98446e-18	3_Prolif
Rbm15	2.75878e-22	0.222025	0.564	0.233	0.331	6.21139e-18	3_Prolif
Lyar	3.007e-22	0.393205	0.904	0.593	0.311	6.77025e-18	3_Prolif
Calm3	3.62767e-22	0.505941	0.984	0.838	0.146	8.1677e-18	3_Prolif
Ptgis	3.66623e-22	-0.941261	0.122	0.457	-0.335	8.25453e-18	3_Prolif
Lcorl	3.97754e-22	0.373654	0.697	0.347	0.35	8.95542e-18	3_Prolif
Srsf2	4.19032e-22	0.38767	0.995	0.928	0.067	9.43451e-18	3_Prolif
1700025G04Rik	4.66764e-22	0.412632	0.952	0.646	0.306	1.05092e-17	3_Prolif
Ldha	4.82416e-22	0.535203	1	0.977	0.023	1.08616e-17	3_Prolif
Sqle	5.63463e-22	0.404516	0.904	0.546	0.358	1.26864e-17	3_Prolif
Selenom	5.73202e-22	-0.812236	0.947	0.912	0.035	1.29056e-17	3_Prolif
Spats2l	6.19404e-22	0.439415	0.846	0.517	0.329	1.39459e-17	3_Prolif
Rnf26	6.86838e-22	0.282927	0.697	0.343	0.354	1.54641e-17	3_Prolif
Vdac1	8.94732e-22	0.465908	0.984	0.847	0.137	2.01449e-17	3_Prolif
Ddx39	9.10784e-22	0.345037	0.846	0.501	0.345	2.05063e-17	3_Prolif
Mxra8	9.44267e-22	-0.881018	0.186	0.503	-0.317	2.12602e-17	3_Prolif
Tbc1d4	9.69064e-22	0.297841	0.585	0.27	0.315	2.18185e-17	3_Prolif
Meaf6	1.08825e-21	0.231503	0.543	0.225	0.318	2.45021e-17	3_Prolif
Hpf1	1.13097e-21	0.335584	0.846	0.521	0.325	2.54637e-17	3_Prolif
Lsm5	1.20845e-21	0.355153	0.941	0.709	0.232	2.72082e-17	3_Prolif
Mvd	1.25636e-21	0.35446	0.644	0.314	0.33	2.8287e-17	3_Prolif
Cd200	1.3231e-21	-0.765663	0.106	0.44	-0.334	2.97895e-17	3_Prolif
Wif1	1.41521e-21	-1.81187	0.074	0.413	-0.339	3.18636e-17	3_Prolif
Gng5	1.45562e-21	0.445356	1	0.973	0.027	3.27732e-17	3_Prolif
Serpina3n	1.5617e-21	0.286894	0.702	0.326	0.376	3.51617e-17	3_Prolif
Psip1	1.62762e-21	0.372664	0.862	0.547	0.315	3.66458e-17	3_Prolif
Gsn	1.67976e-21	-1.13125	0.59	0.729	-0.139	3.78198e-17	3_Prolif
Igf2	1.82228e-21	0.366029	0.952	0.575	0.377	4.10285e-17	3_Prolif
Ptch1	2.20318e-21	0.485479	0.952	0.653	0.299	4.96045e-17	3_Prolif
Psat1	2.66024e-21	0.270579	0.676	0.306	0.37	5.98953e-17	3_Prolif
Cnmd	2.73074e-21	0.724865	1	0.704	0.296	6.14826e-17	3_Prolif
Eef1d	3.22203e-21	0.352165	0.989	0.96	0.029	7.25439e-17	3_Prolif
Dhcr24	3.32994e-21	0.380411	0.787	0.43	0.357	7.49737e-17	3_Prolif
Bckdk	3.91764e-21	0.313838	0.745	0.422	0.323	8.82056e-17	3_Prolif
Eif1ad	4.23287e-21	0.345351	0.851	0.517	0.334	9.5303e-17	3_Prolif
Rfc1	4.34149e-21	0.465293	0.771	0.485	0.286	9.77486e-17	3_Prolif
Rab28	4.55979e-21	0.341348	0.968	0.632	0.336	1.02664e-16	3_Prolif
Pkm	5.00205e-21	0.524434	1	0.959	0.041	1.12621e-16	3_Prolif
Med30	6.37384e-21	0.299643	0.83	0.47	0.36	1.43507e-16	3_Prolif
Spp1	7.63216e-21	-5.19638	0.638	0.734	-0.096	1.71838e-16	3_Prolif
2610524H06Rik	7.73721e-21	0.38221	0.835	0.518	0.317	1.74203e-16	3_Prolif
Kpnb1	8.44967e-21	0.327677	0.941	0.642	0.299	1.90244e-16	3_Prolif
Atp5g2	8.62056e-21	0.324499	1	0.98	0.02	1.94092e-16	3_Prolif
Adamts2	8.75583e-21	-1.06423	0.037	0.374	-0.337	1.97137e-16	3_Prolif
C1qtnf6	9.94319e-21	-0.70079	0.596	0.741	-0.145	2.23871e-16	3_Prolif
Lss	1.01256e-20	0.275715	0.612	0.279	0.333	2.27978e-16	3_Prolif
Matn1	1.22107e-20	0.648213	1	0.709	0.291	2.74925e-16	3_Prolif
Rbbp8	1.28223e-20	0.210012	0.59	0.255	0.335	2.88694e-16	3_Prolif
Scoc	1.28634e-20	0.26788	0.803	0.408	0.395	2.89619e-16	3_Prolif
Dcp2	1.39413e-20	0.204496	0.644	0.28	0.364	3.13889e-16	3_Prolif
Smc1a	2.05766e-20	0.417288	0.867	0.628	0.239	4.63282e-16	3_Prolif
Hnrnpa3	2.15867e-20	0.412757	1	0.939	0.061	4.86025e-16	3_Prolif
Sclt1	2.16181e-20	0.229627	0.59	0.259	0.331	4.86731e-16	3_Prolif
Map1lc3b	2.18347e-20	-0.665491	0.931	0.936	-0.005	4.91608e-16	3_Prolif
Tmsb4x	3.68604e-20	-2.68707	0.67	0.769	-0.099	8.29913e-16	3_Prolif
Btg1	3.73225e-20	-0.686169	0.968	0.963	0.005	8.40315e-16	3_Prolif
Ctdspl2	3.78353e-20	0.215497	0.665	0.294	0.371	8.51861e-16	3_Prolif
Cyp51	4.74693e-20	0.465235	0.931	0.68	0.251	1.06877e-15	3_Prolif
Trpv4	4.96257e-20	0.378568	0.926	0.628	0.298	1.11732e-15	3_Prolif
Ibsp	5.04335e-20	-3.89931	0.17	0.467	-0.297	1.13551e-15	3_Prolif
Hnrnpd	5.17662e-20	0.398836	0.973	0.821	0.152	1.16552e-15	3_Prolif
Ndufa4l2	5.86783e-20	0.676216	0.952	0.615	0.337	1.32114e-15	3_Prolif
Gtf2f2	6.15789e-20	0.281635	0.835	0.461	0.374	1.38645e-15	3_Prolif
Fkbp10	6.43694e-20	-0.579429	0.984	0.982	0.002	1.44928e-15	3_Prolif
Ifitm3	7.83504e-20	-1.95886	0.17	0.467	-0.297	1.76406e-15	3_Prolif
Mgarp	9.18078e-20	0.222013	0.761	0.358	0.403	2.06705e-15	3_Prolif
Crispld2	9.39464e-20	0.222592	0.606	0.265	0.341	2.1152e-15	3_Prolif
Ldlr	1.07565e-19	0.447399	0.936	0.704	0.232	2.42183e-15	3_Prolif
Rps5	1.12127e-19	0.32105	1	0.999	0.001	2.52453e-15	3_Prolif
Map1lc3a	1.19673e-19	-0.595464	0.638	0.761	-0.123	2.69444e-15	3_Prolif
Nrk	1.35252e-19	0.473364	0.995	0.653	0.342	3.04519e-15	3_Prolif
H3f3b	2.04246e-19	0.656269	1	1	0	4.59861e-15	3_Prolif
Hnrnpf	2.08025e-19	0.353621	1	0.962	0.038	4.68368e-15	3_Prolif
Lsp1	2.23356e-19	0.389161	0.771	0.424	0.347	5.02887e-15	3_Prolif
Hspb11	2.26829e-19	0.396751	0.957	0.713	0.244	5.10706e-15	3_Prolif
Gramd2	2.28835e-19	0.276685	0.84	0.461	0.379	5.15221e-15	3_Prolif
Gpc1	2.29433e-19	-0.675831	0.947	0.91	0.037	5.16568e-15	3_Prolif
Pih1d1	2.33142e-19	0.22693	0.75	0.373	0.377	5.24918e-15	3_Prolif
Cp	2.35996e-19	-1.19359	0.053	0.367	-0.314	5.31345e-15	3_Prolif
Frmd6	2.52183e-19	-0.793764	0.335	0.586	-0.251	5.67789e-15	3_Prolif
Cbx1	2.56881e-19	0.360338	0.957	0.729	0.228	5.78367e-15	3_Prolif
A430005L14Rik	2.68064e-19	0.201819	0.628	0.287	0.341	6.03546e-15	3_Prolif
Timp2	3.0546e-19	-0.794175	0.878	0.895	-0.017	6.87744e-15	3_Prolif
Tceal9	3.09589e-19	0.384927	0.989	0.941	0.048	6.97039e-15	3_Prolif
Vcan	3.23225e-19	-1.48318	0.027	0.346	-0.319	7.27742e-15	3_Prolif
Hsd17b7	4.21677e-19	0.443195	0.824	0.514	0.31	9.49406e-15	3_Prolif
Atp1a1	4.57745e-19	-0.804394	0.957	0.949	0.008	1.03061e-14	3_Prolif
Prrx1	4.72114e-19	-0.967089	0.106	0.41	-0.304	1.06296e-14	3_Prolif
Cdh2	4.97059e-19	-1.18484	0.112	0.41	-0.298	1.11913e-14	3_Prolif
1500015O10Rik	5.28432e-19	0.325281	0.995	0.652	0.343	1.18976e-14	3_Prolif
Banf1	5.47544e-19	0.340954	0.952	0.761	0.191	1.23279e-14	3_Prolif
B2m	5.56626e-19	-1.17516	0.527	0.68	-0.153	1.25324e-14	3_Prolif
Hnrnpu	6.44748e-19	0.338155	0.995	0.939	0.056	1.45165e-14	3_Prolif
Sgk1	6.64302e-19	-0.969405	0.463	0.655	-0.192	1.49568e-14	3_Prolif
Ppil1	7.70075e-19	0.217228	0.58	0.273	0.307	1.73382e-14	3_Prolif
G3bp1	9.48439e-19	0.341626	0.952	0.755	0.197	2.13541e-14	3_Prolif
Txn1	9.5999e-19	0.340891	0.995	0.96	0.035	2.16142e-14	3_Prolif
Srf	1.00606e-18	0.296454	0.723	0.383	0.34	2.26514e-14	3_Prolif
Sdc2	1.07486e-18	-1.10948	0.654	0.751	-0.097	2.42006e-14	3_Prolif
Ncmap	1.09464e-18	0.41251	0.957	0.548	0.409	2.46459e-14	3_Prolif
Pa2g4	1.31116e-18	0.325596	0.926	0.65	0.276	2.95207e-14	3_Prolif
Jpt1	1.45489e-18	0.473091	0.899	0.65	0.249	3.27568e-14	3_Prolif
Acp1	1.55591e-18	0.338798	0.952	0.742	0.21	3.50313e-14	3_Prolif
Vars	1.75047e-18	0.266506	0.814	0.47	0.344	3.94119e-14	3_Prolif
Dpysl3	1.85415e-18	-1.05105	0.069	0.374	-0.305	4.17463e-14	3_Prolif
Snrpb	1.88783e-18	0.322868	0.995	0.935	0.06	4.25046e-14	3_Prolif
Pygl	2.03007e-18	0.308955	0.936	0.528	0.408	4.5707e-14	3_Prolif
Zfp36l1	2.04021e-18	-1.14057	0.559	0.686	-0.127	4.59353e-14	3_Prolif
Smim14	2.39188e-18	-0.611801	0.691	0.762	-0.071	5.38533e-14	3_Prolif
Rtl3	2.47969e-18	0.331338	0.809	0.43	0.379	5.58301e-14	3_Prolif
Ptges3	2.66667e-18	0.372971	0.968	0.818	0.15	6.00402e-14	3_Prolif
Serpinf1	3.22434e-18	-2.11725	0.202	0.478	-0.276	7.25959e-14	3_Prolif
Fam89a	3.43386e-18	0.307406	0.846	0.438	0.408	7.73135e-14	3_Prolif
Acly	3.84416e-18	0.41005	0.92	0.61	0.31	8.65513e-14	3_Prolif
Sparcl1	3.92367e-18	0.2815	0.755	0.399	0.356	8.83415e-14	3_Prolif
Slit2	4.60637e-18	-0.792756	0.053	0.354	-0.301	1.03712e-13	3_Prolif
Lpar4	4.61634e-18	0.227868	0.697	0.343	0.354	1.03937e-13	3_Prolif
Tctex1d2	4.71044e-18	0.246204	0.67	0.337	0.333	1.06056e-13	3_Prolif
Col6a1	4.74681e-18	-0.994441	0.84	0.853	-0.013	1.06875e-13	3_Prolif
Slc43a3	4.84757e-18	0.315298	0.894	0.545	0.349	1.09143e-13	3_Prolif
Rpl35a	4.89828e-18	0.276842	1	0.999	0.001	1.10285e-13	3_Prolif
Ppp1r2	4.9533e-18	0.318515	0.936	0.677	0.259	1.11524e-13	3_Prolif
Rps15	4.98907e-18	0.288463	1	0.999	0.001	1.12329e-13	3_Prolif
Serinc3	5.42582e-18	-0.5264	0.782	0.82	-0.038	1.22162e-13	3_Prolif
Tmem176a	5.85787e-18	-0.95225	0.856	0.849	0.007	1.3189e-13	3_Prolif
Cdk6	5.87132e-18	0.353272	0.899	0.561	0.338	1.32193e-13	3_Prolif
Srsf10	6.58429e-18	0.355372	0.963	0.747	0.216	1.48245e-13	3_Prolif
Casp8ap2	6.7999e-18	0.255388	0.574	0.266	0.308	1.531e-13	3_Prolif
Cnn2	7.26611e-18	-1.12351	0.293	0.531	-0.238	1.63596e-13	3_Prolif
Nrp2	7.40754e-18	-1.06153	0.101	0.393	-0.292	1.66781e-13	3_Prolif
Ywhaq	7.86137e-18	0.363848	0.995	0.924	0.071	1.76999e-13	3_Prolif
Lamp1	8.5951e-18	-0.492783	0.968	0.959	0.009	1.93519e-13	3_Prolif
Pkdcc	9.95467e-18	0.360153	0.979	0.716	0.263	2.24129e-13	3_Prolif
Fzr1	1.05365e-17	0.202836	0.521	0.231	0.29	2.3723e-13	3_Prolif
Rplp1	1.05698e-17	0.252079	1	1	0	2.3798e-13	3_Prolif
Rps16	1.17918e-17	0.253973	1	0.999	0.001	2.65493e-13	3_Prolif
Soat1	1.22429e-17	0.261685	0.793	0.43	0.363	2.75649e-13	3_Prolif
Olfml3	1.23082e-17	-1.28254	0.452	0.623	-0.171	2.77119e-13	3_Prolif
Prps1	1.40552e-17	0.248991	0.729	0.405	0.324	3.16452e-13	3_Prolif
Tnc	1.5977e-17	-3.01962	0.202	0.465	-0.263	3.59723e-13	3_Prolif
Col6a2	1.68351e-17	-0.947697	0.484	0.675	-0.191	3.79042e-13	3_Prolif
U2af1	1.77182e-17	0.35328	0.963	0.831	0.132	3.98925e-13	3_Prolif
Tcerg1	2.04319e-17	0.322174	0.851	0.582	0.269	4.60024e-13	3_Prolif
Anxa11	2.67482e-17	0.355916	0.915	0.562	0.353	6.02236e-13	3_Prolif
Zeb2	2.85255e-17	-0.892625	0.101	0.388	-0.287	6.42252e-13	3_Prolif
Meltf	3.03738e-17	0.288698	0.957	0.562	0.395	6.83867e-13	3_Prolif
Gm42418	3.09183e-17	-0.563647	1	1	0	6.96125e-13	3_Prolif
Fasn	3.1217e-17	0.397551	0.867	0.59	0.277	7.02851e-13	3_Prolif
Extl1	3.12987e-17	0.223195	0.537	0.238	0.299	7.0469e-13	3_Prolif
Gtf2a2	3.30201e-17	0.355615	0.947	0.81	0.137	7.43448e-13	3_Prolif
Serbp1	3.41964e-17	0.333054	1	0.972	0.028	7.69931e-13	3_Prolif
Psap	3.45822e-17	-0.585263	0.963	0.948	0.015	7.78618e-13	3_Prolif
Myh10	4.18943e-17	0.229418	0.67	0.339	0.331	9.43251e-13	3_Prolif
Rpl26	4.19095e-17	0.285917	1	0.998	0.002	9.43592e-13	3_Prolif
Fmod	4.39527e-17	0.434474	0.995	0.859	0.136	9.89594e-13	3_Prolif
Lcp1	4.6607e-17	0.248179	0.58	0.28	0.3	1.04936e-12	3_Prolif
Tgfbi	4.71307e-17	0.32525	0.995	0.769	0.226	1.06115e-12	3_Prolif
Nav2	5.19099e-17	0.229575	0.793	0.429	0.364	1.16875e-12	3_Prolif
mt-Cytb	5.63148e-17	-0.491385	1	1	0	1.26793e-12	3_Prolif
Ppp1r7	6.07743e-17	0.206889	0.702	0.355	0.347	1.36833e-12	3_Prolif
Pdk1	8.74061e-17	0.293989	0.84	0.492	0.348	1.96795e-12	3_Prolif
Erh	8.8119e-17	0.323576	0.931	0.713	0.218	1.984e-12	3_Prolif
H19	8.85781e-17	0.586049	1	0.818	0.182	1.99434e-12	3_Prolif
Maz	9.23254e-17	0.300787	0.91	0.665	0.245	2.07871e-12	3_Prolif
Txnl1	9.55609e-17	0.315504	0.989	0.859	0.13	2.15155e-12	3_Prolif
Supt16	9.66628e-17	0.29998	0.809	0.497	0.312	2.17636e-12	3_Prolif
Itga6	1.0033e-16	0.218636	0.729	0.379	0.35	2.25894e-12	3_Prolif
Hnrnpul1	1.01578e-16	0.299974	0.814	0.507	0.307	2.28703e-12	3_Prolif
Tpr	1.06477e-16	0.346958	0.979	0.847	0.132	2.39732e-12	3_Prolif
Gm1673	1.10571e-16	0.324559	0.814	0.468	0.346	2.48951e-12	3_Prolif
Rdh11	1.12877e-16	0.258413	0.633	0.315	0.318	2.54142e-12	3_Prolif
3110079O15Rik	1.1847e-16	0.658844	1	0.828	0.172	2.66736e-12	3_Prolif
Lhfp	1.273e-16	-0.730394	0.085	0.368	-0.283	2.86616e-12	3_Prolif
H2-Ab1	1.3394e-16	0.326658	0.777	0.418	0.359	3.01567e-12	3_Prolif
Emc8	1.34883e-16	0.269617	0.809	0.487	0.322	3.03689e-12	3_Prolif
Chadl	1.48561e-16	0.368382	0.995	0.636	0.359	3.34486e-12	3_Prolif
Parp1	1.49218e-16	0.242072	0.697	0.373	0.324	3.35963e-12	3_Prolif
Rif1	1.56844e-16	0.298643	0.638	0.334	0.304	3.53135e-12	3_Prolif
Cebpg	1.6561e-16	0.316324	0.787	0.48	0.307	3.7287e-12	3_Prolif
Mogs	1.77033e-16	0.2981	0.846	0.559	0.287	3.9859e-12	3_Prolif
Rpl18	2.12103e-16	0.234804	1	1	0	4.77551e-12	3_Prolif
Insig1	2.15947e-16	0.401705	0.989	0.777	0.212	4.86204e-12	3_Prolif
Ctsb	2.43657e-16	-0.637663	0.83	0.88	-0.05	5.48595e-12	3_Prolif
Elovl6	2.49214e-16	0.299619	0.84	0.503	0.337	5.61104e-12	3_Prolif
Acaca	2.52731e-16	0.226463	0.702	0.39	0.312	5.69024e-12	3_Prolif
A2m	2.53545e-16	0.25206	0.686	0.344	0.342	5.70856e-12	3_Prolif
Yipf1	3.05599e-16	0.338597	0.91	0.625	0.285	6.88056e-12	3_Prolif
S100a16	3.14651e-16	-0.580268	0.351	0.564	-0.213	7.08437e-12	3_Prolif
Rnps1	3.16426e-16	0.307648	0.851	0.579	0.272	7.12432e-12	3_Prolif
Cald1	3.19401e-16	-1.04245	0.867	0.877	-0.01	7.19131e-12	3_Prolif
Cox4i2	3.19822e-16	0.43955	0.936	0.61	0.326	7.2008e-12	3_Prolif
Smoc2	3.34705e-16	0.478917	0.995	0.71	0.285	7.53589e-12	3_Prolif
Sgms2	3.51468e-16	-1.25161	0.601	0.71	-0.109	7.91331e-12	3_Prolif
Nudt2	3.60396e-16	0.214549	0.729	0.382	0.347	8.11431e-12	3_Prolif
Dyrk1a	3.67187e-16	0.283095	0.84	0.543	0.297	8.26722e-12	3_Prolif
Chst11	3.68442e-16	0.451167	1	0.728	0.272	8.29546e-12	3_Prolif
Zfp91	3.81025e-16	0.337329	0.963	0.798	0.165	8.57878e-12	3_Prolif
Arf4	3.96311e-16	-0.412523	1	0.981	0.019	8.92294e-12	3_Prolif
Lamp2	4.01608e-16	-0.529464	0.883	0.871	0.012	9.0422e-12	3_Prolif
Snx5	4.08233e-16	0.275447	0.904	0.604	0.3	9.19138e-12	3_Prolif
Dapk2	4.68411e-16	-0.622195	0.027	0.302	-0.275	1.05463e-11	3_Prolif
Kazald1	4.96127e-16	-1.01617	0.165	0.425	-0.26	1.11703e-11	3_Prolif
Rap1b	5.25405e-16	-0.586959	0.739	0.795	-0.056	1.18295e-11	3_Prolif
Ctsc	5.63023e-16	-0.816739	0.037	0.31	-0.273	1.26765e-11	3_Prolif
Pank2	5.63481e-16	0.204387	0.681	0.349	0.332	1.26868e-11	3_Prolif
Rrs1	5.78977e-16	0.222349	0.596	0.292	0.304	1.30357e-11	3_Prolif
Lifr	5.89119e-16	-0.971775	0.505	0.646	-0.141	1.3264e-11	3_Prolif
Sox4	6.0273e-16	-1.03148	0.33	0.545	-0.215	1.35705e-11	3_Prolif
Nid2	7.16254e-16	0.386716	0.952	0.651	0.301	1.61265e-11	3_Prolif
Ckap4	7.24282e-16	0.413763	1	0.944	0.056	1.63072e-11	3_Prolif
Olfml2b	8.17582e-16	-1.65153	0.106	0.374	-0.268	1.84078e-11	3_Prolif
Prdx2	8.2041e-16	-0.749778	0.92	0.911	0.009	1.84715e-11	3_Prolif
Aes	8.39902e-16	-0.867683	0.16	0.421	-0.261	1.89104e-11	3_Prolif
Pfkl	9.10165e-16	0.303793	0.904	0.566	0.338	2.04924e-11	3_Prolif
Satb2	9.39079e-16	-0.632063	0.027	0.296	-0.269	2.11434e-11	3_Prolif
Ccdc80	1.09216e-15	-0.80526	0.75	0.811	-0.061	2.459e-11	3_Prolif
Tcp11l2	1.12085e-15	-0.369557	0.122	0.406	-0.284	2.5236e-11	3_Prolif
Tsn	1.13987e-15	0.315513	0.995	0.88	0.115	2.56641e-11	3_Prolif
Lox	1.16935e-15	-1.43187	0.149	0.406	-0.257	2.63279e-11	3_Prolif
Rps25	1.2131e-15	0.292311	1	0.996	0.004	2.7313e-11	3_Prolif
Ppic	1.41536e-15	-0.540718	0.995	0.969	0.026	3.18669e-11	3_Prolif
Sorbs1	1.42427e-15	0.279355	0.745	0.443	0.302	3.20674e-11	3_Prolif
Hpgd	1.54018e-15	-0.813884	0.069	0.335	-0.266	3.46772e-11	3_Prolif
Lrrc42	1.54159e-15	0.30338	0.771	0.483	0.288	3.47088e-11	3_Prolif
Shmt2	1.62143e-15	0.248185	0.835	0.489	0.346	3.65064e-11	3_Prolif
Gpsm2	1.73855e-15	0.261143	0.745	0.423	0.322	3.91435e-11	3_Prolif
Slc35e3	1.76124e-15	0.301511	0.952	0.596	0.356	3.96542e-11	3_Prolif
Gpx1	1.77475e-15	-0.500217	0.787	0.815	-0.028	3.99584e-11	3_Prolif
Tmem97	1.83383e-15	0.411975	0.931	0.654	0.277	4.12888e-11	3_Prolif
Hint1	1.84422e-15	0.257236	1	0.98	0.02	4.15225e-11	3_Prolif
Hprt	1.87016e-15	0.292469	0.904	0.645	0.259	4.21066e-11	3_Prolif
Cab39l	1.89949e-15	0.23991	0.697	0.372	0.325	4.2767e-11	3_Prolif
Rpl36a	1.91513e-15	0.268795	1	0.996	0.004	4.31192e-11	3_Prolif
Hip1r	2.07801e-15	0.282397	0.83	0.498	0.332	4.67865e-11	3_Prolif
Rpp21	2.25146e-15	0.246523	0.809	0.477	0.332	5.06916e-11	3_Prolif
Srpx2	2.29045e-15	-0.619344	0.101	0.38	-0.279	5.15695e-11	3_Prolif
Rps3	2.38492e-15	0.246577	0.995	0.999	-0.004	5.36966e-11	3_Prolif
Arl6ip6	2.46964e-15	0.206401	0.617	0.315	0.302	5.56039e-11	3_Prolif
Adamts1	2.61812e-15	-0.882862	0.314	0.535	-0.221	5.8947e-11	3_Prolif
Cfap20	2.64093e-15	0.282856	0.904	0.583	0.321	5.94606e-11	3_Prolif
Yeats4	2.93349e-15	0.267158	0.713	0.423	0.29	6.60476e-11	3_Prolif
Zfhx4	3.02164e-15	-0.810244	0.096	0.361	-0.265	6.80322e-11	3_Prolif
Pmvk	3.02581e-15	0.450885	0.862	0.61	0.252	6.81261e-11	3_Prolif
Matn2	3.74252e-15	0.21589	0.739	0.397	0.342	8.42628e-11	3_Prolif
Hist1h1c	4.02693e-15	0.453818	0.936	0.62	0.316	9.06662e-11	3_Prolif
Rabac1	4.54344e-15	-0.439218	0.915	0.902	0.013	1.02296e-10	3_Prolif
Magohb	4.93259e-15	0.241871	0.819	0.495	0.324	1.11057e-10	3_Prolif
Mme	4.9818e-15	-0.913696	0.122	0.378	-0.256	1.12165e-10	3_Prolif
Hspd1	5.1465e-15	0.400081	0.979	0.839	0.14	1.15873e-10	3_Prolif
Prdx5	5.24802e-15	-0.399106	0.973	0.943	0.03	1.18159e-10	3_Prolif
Prr5	6.04328e-15	0.225363	0.761	0.415	0.346	1.36064e-10	3_Prolif
Htra1	6.50481e-15	-0.805817	0.431	0.606	-0.175	1.46456e-10	3_Prolif
Vasn	6.79953e-15	-0.61204	0.707	0.799	-0.092	1.53091e-10	3_Prolif
Klf6	7.56159e-15	-1.02882	0.473	0.646	-0.173	1.70249e-10	3_Prolif
Slc35a3	8.24898e-15	0.220865	0.755	0.426	0.329	1.85726e-10	3_Prolif
Fuca2	8.29792e-15	0.224177	0.904	0.564	0.34	1.86828e-10	3_Prolif
Gja1	9.0601e-15	-1.49391	0.601	0.684	-0.083	2.03988e-10	3_Prolif
Sidt2	1.00127e-14	-0.44419	0.383	0.584	-0.201	2.25435e-10	3_Prolif
Pnrc1	1.11388e-14	-0.647519	0.739	0.785	-0.046	2.50791e-10	3_Prolif
Fgfrl1	1.12157e-14	0.306734	0.957	0.638	0.319	2.52521e-10	3_Prolif
Nin	1.13499e-14	0.22642	0.782	0.443	0.339	2.55543e-10	3_Prolif
P4ha3	1.1402e-14	0.221645	0.697	0.364	0.333	2.56715e-10	3_Prolif
Cdc42se1	1.1748e-14	0.218885	0.697	0.372	0.325	2.64506e-10	3_Prolif
Tbc1d10a	1.21358e-14	0.246007	0.697	0.4	0.297	2.73238e-10	3_Prolif
Fam180a	1.29415e-14	0.236887	0.931	0.548	0.383	2.91379e-10	3_Prolif
Hnrnpa0	1.34305e-14	0.25666	1	0.976	0.024	3.02389e-10	3_Prolif
Ppa1	1.3913e-14	0.381939	0.963	0.794	0.169	3.13252e-10	3_Prolif
Cryl1	1.4249e-14	0.200129	0.606	0.314	0.292	3.20816e-10	3_Prolif
Rps13	1.45111e-14	0.236207	1	0.998	0.002	3.26717e-10	3_Prolif
Snhg6	1.54584e-14	0.329249	0.973	0.821	0.152	3.48046e-10	3_Prolif
Eef1g	1.68176e-14	0.289823	1	0.989	0.011	3.78647e-10	3_Prolif
Mia	1.74405e-14	0.54715	1	0.653	0.347	3.92673e-10	3_Prolif
Ier5	1.76428e-14	-0.714016	0.75	0.809	-0.059	3.97227e-10	3_Prolif
Kmt5a	1.81208e-14	0.295442	0.824	0.525	0.299	4.07989e-10	3_Prolif
Uxs1	1.88616e-14	0.263684	0.867	0.579	0.288	4.24669e-10	3_Prolif
Vps37b	1.91879e-14	0.224557	0.803	0.47	0.333	4.32016e-10	3_Prolif
Xpo1	1.93e-14	0.207615	0.686	0.395	0.291	4.3454e-10	3_Prolif
Reep3	1.93983e-14	-0.527176	0.617	0.714	-0.097	4.36752e-10	3_Prolif
Galk1	1.94324e-14	0.351904	0.952	0.761	0.191	4.3752e-10	3_Prolif
Unc5b	1.97757e-14	-0.647439	0.372	0.556	-0.184	4.45249e-10	3_Prolif
Fkbp2	2.10415e-14	0.299857	0.926	0.676	0.25	4.7375e-10	3_Prolif
mt-Atp6	2.14644e-14	-0.522552	1	1	0	4.83271e-10	3_Prolif
Twist1	2.25379e-14	-0.657184	0.08	0.335	-0.255	5.07442e-10	3_Prolif
Fam20b	2.5147e-14	0.299389	0.883	0.56	0.323	5.66185e-10	3_Prolif
Stub1	2.68522e-14	0.304281	0.947	0.813	0.134	6.04576e-10	3_Prolif
Rcn2	2.77096e-14	0.308211	0.995	0.904	0.091	6.23882e-10	3_Prolif
Lsm4	2.79291e-14	0.314675	0.968	0.793	0.175	6.28824e-10	3_Prolif
Itm2a	3.14304e-14	0.31277	1	0.903	0.097	7.07656e-10	3_Prolif
Rps8	3.22287e-14	0.209762	1	1	0	7.2563e-10	3_Prolif
Ywhae	3.72522e-14	0.261013	0.995	0.974	0.021	8.38734e-10	3_Prolif
Mrpl57	3.93939e-14	0.305487	0.941	0.751	0.19	8.86954e-10	3_Prolif
Col6a3	4.21909e-14	-1.00902	0.878	0.872	0.006	9.49929e-10	3_Prolif
C1qtnf4	4.92756e-14	0.211282	0.824	0.46	0.364	1.10944e-09	3_Prolif
Runx1	4.93639e-14	-0.787383	0.734	0.807	-0.073	1.11143e-09	3_Prolif
Npc2	5.35184e-14	-0.43561	0.968	0.95	0.018	1.20497e-09	3_Prolif
Wbp11	5.89438e-14	0.245608	0.872	0.593	0.279	1.32712e-09	3_Prolif
Ndufa13	6.50698e-14	-0.339607	0.984	0.966	0.018	1.46505e-09	3_Prolif
Creb3l1	7.38868e-14	-0.777184	0.165	0.4	-0.235	1.66356e-09	3_Prolif
Hnrnpr	7.51087e-14	0.278651	0.941	0.702	0.239	1.69107e-09	3_Prolif
Rpl32	7.52646e-14	0.259264	1	0.999	0.001	1.69458e-09	3_Prolif
S100a6	9.6363e-14	-1.24293	0.809	0.802	0.007	2.16961e-09	3_Prolif
Hes1	9.82033e-14	0.530598	0.926	0.699	0.227	2.21105e-09	3_Prolif
Gpx8	1.00231e-13	-0.474959	0.926	0.891	0.035	2.2567e-09	3_Prolif
Dkc1	1.00563e-13	0.242849	0.755	0.451	0.304	2.26417e-09	3_Prolif
Angptl4	1.03423e-13	-0.650757	0.048	0.293	-0.245	2.32857e-09	3_Prolif
Scaf11	1.03582e-13	0.284384	0.941	0.698	0.243	2.33215e-09	3_Prolif
Cyr61	1.09358e-13	0.60956	0.989	0.909	0.08	2.46219e-09	3_Prolif
Hspe1	1.5421e-13	0.327155	1	0.947	0.053	3.47204e-09	3_Prolif
Tomm20	1.60272e-13	0.286636	0.989	0.965	0.024	3.60852e-09	3_Prolif
Mmp14	1.66122e-13	-1.25084	0.66	0.723	-0.063	3.74023e-09	3_Prolif
Clic1	1.66313e-13	0.302737	0.973	0.795	0.178	3.74454e-09	3_Prolif
Tmem45a	1.66652e-13	0.342603	0.952	0.654	0.298	3.75218e-09	3_Prolif
Ptprd	1.83456e-13	-1.09105	0.42	0.558	-0.138	4.13052e-09	3_Prolif
Gpx3	1.98801e-13	-0.986074	0.165	0.387	-0.222	4.476e-09	3_Prolif
Msi2	2.07844e-13	0.320781	1	0.809	0.191	4.67961e-09	3_Prolif
Palld	2.10942e-13	-0.674645	0.266	0.478	-0.212	4.74937e-09	3_Prolif
Irx3	2.12132e-13	-0.449135	0.059	0.305	-0.246	4.77615e-09	3_Prolif
Ncl	2.12508e-13	0.328689	0.995	0.984	0.011	4.78462e-09	3_Prolif
Tkt	2.30844e-13	0.29637	1	0.888	0.112	5.19746e-09	3_Prolif
Psmb2	2.33396e-13	0.295308	0.984	0.904	0.08	5.2549e-09	3_Prolif
Adamts5	2.3546e-13	-0.782066	0.122	0.359	-0.237	5.30138e-09	3_Prolif
Sh3pxd2b	2.38526e-13	-0.555685	0.181	0.405	-0.224	5.37041e-09	3_Prolif
Rps18	2.86101e-13	0.252044	1	0.999	0.001	6.44155e-09	3_Prolif
Qsox1	2.87086e-13	-0.841353	0.537	0.658	-0.121	6.46373e-09	3_Prolif
Acsl3	2.89956e-13	0.211386	0.782	0.457	0.325	6.52835e-09	3_Prolif
Fkbp4	3.02077e-13	0.295189	0.904	0.655	0.249	6.80126e-09	3_Prolif
Pacsin2	3.16322e-13	0.230976	0.888	0.551	0.337	7.122e-09	3_Prolif
Ctsh	3.16852e-13	-0.636435	0.532	0.651	-0.119	7.13393e-09	3_Prolif
Lpp	3.17456e-13	-0.551223	0.58	0.683	-0.103	7.14753e-09	3_Prolif
Impad1	3.17634e-13	0.323055	0.989	0.793	0.196	7.15153e-09	3_Prolif
Sema5a	3.92433e-13	-0.450979	0.064	0.302	-0.238	8.83564e-09	3_Prolif
Sox6	4.07009e-13	0.259398	0.867	0.561	0.306	9.1638e-09	3_Prolif
Klf10	4.12452e-13	0.289899	0.835	0.58	0.255	9.28636e-09	3_Prolif
Gtf2e2	4.25626e-13	0.254001	0.846	0.561	0.285	9.58298e-09	3_Prolif
Wscd2	4.31492e-13	0.203948	0.676	0.369	0.307	9.71505e-09	3_Prolif
Emp1	4.46681e-13	-0.75935	0.83	0.872	-0.042	1.0057e-08	3_Prolif
Gm5617	5.42133e-13	0.234708	0.766	0.467	0.299	1.22061e-08	3_Prolif
Ubb	5.71744e-13	-0.457789	1	0.998	0.002	1.28728e-08	3_Prolif
Fkbp3	5.88766e-13	0.312879	0.947	0.781	0.166	1.32561e-08	3_Prolif
Igfbp5	6.09022e-13	-2.4262	0.09	0.323	-0.233	1.37121e-08	3_Prolif
Syncrip	6.3159e-13	0.274687	0.973	0.809	0.164	1.42202e-08	3_Prolif
Lin7c	6.39517e-13	0.260832	0.878	0.586	0.292	1.43987e-08	3_Prolif
Mef2a	6.49626e-13	-0.536054	0.649	0.717	-0.068	1.46263e-08	3_Prolif
Gas1	6.63041e-13	-1.0558	0.149	0.369	-0.22	1.49284e-08	3_Prolif
Maf	7.42397e-13	-0.665205	0.186	0.411	-0.225	1.67151e-08	3_Prolif
Dbi	7.75652e-13	0.334684	0.995	0.955	0.04	1.74638e-08	3_Prolif
Slit3	7.85394e-13	-0.476388	0.069	0.303	-0.234	1.76831e-08	3_Prolif
Slpi	8.07036e-13	0.33679	0.564	0.293	0.271	1.81704e-08	3_Prolif
Fads1	8.10373e-13	0.268196	0.899	0.613	0.286	1.82456e-08	3_Prolif
Sem1	8.29983e-13	-0.402241	1	0.991	0.009	1.86871e-08	3_Prolif
Igf1r	8.43497e-13	0.308694	0.989	0.818	0.171	1.89913e-08	3_Prolif
Rps12	8.44055e-13	0.204682	1	0.999	0.001	1.90039e-08	3_Prolif
Tmx1	8.60792e-13	0.245403	0.963	0.735	0.228	1.93807e-08	3_Prolif
Rps3a1	8.95541e-13	0.212687	1	1	0	2.01631e-08	3_Prolif
Cdk4	9.21256e-13	0.323461	0.968	0.86	0.108	2.07421e-08	3_Prolif
Ilf3	9.24931e-13	0.219943	0.803	0.497	0.306	2.08248e-08	3_Prolif
Ramp1	9.43115e-13	-0.624587	0.059	0.289	-0.23	2.12342e-08	3_Prolif
Pnn	9.44351e-13	0.273318	0.846	0.614	0.232	2.12621e-08	3_Prolif
Epb41l2	9.71633e-13	-0.510509	0.713	0.743	-0.03	2.18763e-08	3_Prolif
S1pr3	1.03343e-12	-0.596751	0.059	0.289	-0.23	2.32676e-08	3_Prolif
Scd1	1.04216e-12	0.289736	0.904	0.554	0.35	2.34642e-08	3_Prolif
Rpl4	1.10488e-12	0.25721	1	0.995	0.005	2.48764e-08	3_Prolif
Me1	1.17241e-12	0.240964	0.926	0.598	0.328	2.63969e-08	3_Prolif
Basp1	1.25974e-12	-0.768201	0.149	0.375	-0.226	2.8363e-08	3_Prolif
Hif1a	1.31105e-12	0.28269	0.989	0.845	0.144	2.95183e-08	3_Prolif
Mmp13	1.37748e-12	-3.68724	0.191	0.398	-0.207	3.10139e-08	3_Prolif
Antxr1	1.39526e-12	-0.764798	0.197	0.409	-0.212	3.14144e-08	3_Prolif
Rpl21	1.46327e-12	0.225591	1	0.997	0.003	3.29454e-08	3_Prolif
Rnf126	1.50933e-12	0.239043	0.888	0.559	0.329	3.39826e-08	3_Prolif
Rpl36	1.62343e-12	0.23998	1	0.997	0.003	3.65516e-08	3_Prolif
Eef1e1	1.64232e-12	0.207912	0.819	0.483	0.336	3.69768e-08	3_Prolif
Wls	1.76234e-12	-0.773069	0.606	0.681	-0.075	3.96792e-08	3_Prolif
Wisp1	1.79268e-12	-0.653103	0.314	0.499	-0.185	4.03621e-08	3_Prolif
Lef1	1.85801e-12	0.210061	0.559	0.289	0.27	4.1833e-08	3_Prolif
Idh3a	1.90946e-12	0.23299	0.723	0.464	0.259	4.29915e-08	3_Prolif
Cnih4	1.99204e-12	0.249755	0.856	0.6	0.256	4.48507e-08	3_Prolif
Snu13	2.03364e-12	0.306515	0.979	0.892	0.087	4.57874e-08	3_Prolif
Cox4i1	2.07783e-12	-0.268872	0.995	0.996	-0.001	4.67824e-08	3_Prolif
Rpl10a	2.14694e-12	0.218971	1	0.999	0.001	4.83383e-08	3_Prolif
Jund	2.15592e-12	-0.437336	0.963	0.977	-0.014	4.85406e-08	3_Prolif
Ndn	2.189e-12	0.288847	0.931	0.658	0.273	4.92853e-08	3_Prolif
Rpsa	2.35886e-12	0.225163	1	1	0	5.31097e-08	3_Prolif
Ppig	2.37783e-12	0.284303	0.968	0.787	0.181	5.35368e-08	3_Prolif
Cd1d1	2.39548e-12	-0.416293	0.032	0.253	-0.221	5.39342e-08	3_Prolif
Fcgrt	2.67286e-12	-0.49871	0.516	0.615	-0.099	6.01795e-08	3_Prolif
Csgalnact1	2.7918e-12	0.255495	0.91	0.559	0.351	6.28573e-08	3_Prolif
Grb10	2.90652e-12	0.339834	0.989	0.895	0.094	6.54403e-08	3_Prolif
Edil3	2.92749e-12	0.255576	0.952	0.622	0.33	6.59125e-08	3_Prolif
Slc16a1	3.06038e-12	0.250539	0.83	0.543	0.287	6.89044e-08	3_Prolif
Suclg1	3.59121e-12	-0.362653	0.718	0.754	-0.036	8.08562e-08	3_Prolif
H2-DMa	3.88042e-12	0.259357	0.798	0.457	0.341	8.73677e-08	3_Prolif
Cox6b2	3.89318e-12	0.20148	0.399	0.183	0.216	8.76549e-08	3_Prolif
Pdgfrb	4.03424e-12	-0.86925	0.059	0.279	-0.22	9.08309e-08	3_Prolif
Auts2	4.1143e-12	0.359313	0.957	0.779	0.178	9.26336e-08	3_Prolif
Tmem50a	4.87993e-12	-0.390385	0.761	0.795	-0.034	1.09872e-07	3_Prolif
Ccnl1	4.90379e-12	-0.634645	0.793	0.821	-0.028	1.10409e-07	3_Prolif
Dlgap4	5.03799e-12	-0.323373	0.181	0.396	-0.215	1.1343e-07	3_Prolif
Anapc11	5.09275e-12	0.220126	0.878	0.619	0.259	1.14663e-07	3_Prolif
Atp5l	5.17741e-12	-0.296045	0.984	0.986	-0.002	1.16569e-07	3_Prolif
1110004F10Rik	5.56349e-12	0.277358	0.973	0.839	0.134	1.25262e-07	3_Prolif
Acat1	5.78609e-12	0.268326	0.936	0.723	0.213	1.30274e-07	3_Prolif
Lgmn	5.90397e-12	-0.612893	0.771	0.759	0.012	1.32928e-07	3_Prolif
Cd9	6.61031e-12	0.361333	1	0.965	0.035	1.48831e-07	3_Prolif
Atf7ip	6.82069e-12	0.22088	0.564	0.313	0.251	1.53568e-07	3_Prolif
Ypel3	6.82426e-12	-0.429211	0.441	0.59	-0.149	1.53648e-07	3_Prolif
Klhl24	7.43867e-12	-0.471851	0.303	0.499	-0.196	1.67482e-07	3_Prolif
Marcks	8.2859e-12	-1.72987	0.468	0.561	-0.093	1.86557e-07	3_Prolif
Flna	8.32817e-12	-0.719899	0.436	0.572	-0.136	1.87509e-07	3_Prolif
Loxl3	8.44982e-12	0.210656	0.92	0.619	0.301	1.90248e-07	3_Prolif
H13	8.64103e-12	-0.397238	0.766	0.771	-0.005	1.94553e-07	3_Prolif
Polr2m	8.85077e-12	0.243968	0.931	0.768	0.163	1.99275e-07	3_Prolif
Rps23	9.21329e-12	0.220219	1	0.999	0.001	2.07437e-07	3_Prolif
Kdm7a	9.32033e-12	-0.385707	0.25	0.451	-0.201	2.09847e-07	3_Prolif
Rps7	9.6026e-12	0.220178	1	0.998	0.002	2.16202e-07	3_Prolif
Trim47	1.07678e-11	0.200495	0.819	0.503	0.316	2.42437e-07	3_Prolif
Smarcc1	1.14901e-11	0.292349	0.819	0.617	0.202	2.58699e-07	3_Prolif
Nasp	1.29857e-11	0.287512	0.851	0.623	0.228	2.92373e-07	3_Prolif
Dnajb9	1.29939e-11	-0.601924	0.574	0.65	-0.076	2.92557e-07	3_Prolif
Csf1	1.3183e-11	-0.691742	0.096	0.31	-0.214	2.96815e-07	3_Prolif
Arf2	1.55933e-11	0.228904	0.862	0.563	0.299	3.51083e-07	3_Prolif
Vdac2	1.63122e-11	0.263248	0.989	0.91	0.079	3.67269e-07	3_Prolif
Cox6c	1.6416e-11	-0.33764	0.995	0.984	0.011	3.69606e-07	3_Prolif
Nav3	1.70257e-11	-0.463685	0.016	0.22	-0.204	3.83335e-07	3_Prolif
Ttc3	1.85506e-11	-0.374452	0.862	0.871	-0.009	4.17666e-07	3_Prolif
Loxl1	2.06008e-11	-0.591589	0.043	0.251	-0.208	4.63827e-07	3_Prolif
Peg3	2.11378e-11	0.337986	1	0.823	0.177	4.75917e-07	3_Prolif
Uba2	2.15587e-11	0.238136	0.84	0.586	0.254	4.85393e-07	3_Prolif
Samd4	2.32252e-11	-0.431588	0.266	0.452	-0.186	5.22916e-07	3_Prolif
Tcf4	2.34453e-11	-0.565164	0.793	0.795	-0.002	5.27872e-07	3_Prolif
Postn	2.51072e-11	-1.12371	0.059	0.279	-0.22	5.65289e-07	3_Prolif
Tnfsf11	2.84001e-11	-0.606415	0.011	0.21	-0.199	6.39429e-07	3_Prolif
Sptssa	2.87588e-11	0.255731	0.92	0.706	0.214	6.47505e-07	3_Prolif
Rpl37	2.88327e-11	0.218473	1	0.999	0.001	6.49168e-07	3_Prolif
Srsf9	2.95587e-11	0.245392	1	0.891	0.109	6.65513e-07	3_Prolif
Cited2	2.97646e-11	-0.607443	0.298	0.482	-0.184	6.70151e-07	3_Prolif
Pole4	3.09156e-11	0.263095	0.862	0.611	0.251	6.96065e-07	3_Prolif
Prelid1	3.1111e-11	0.298479	0.989	0.864	0.125	7.00464e-07	3_Prolif
Tpm1	3.12026e-11	-1.14955	0.936	0.933	0.003	7.02527e-07	3_Prolif
Rdx	3.16614e-11	0.217613	0.984	0.899	0.085	7.12857e-07	3_Prolif
Pin1	3.43136e-11	0.226549	0.878	0.662	0.216	7.72572e-07	3_Prolif
Gabarap	3.48407e-11	-0.331533	0.989	0.976	0.013	7.84438e-07	3_Prolif
Phf5a	3.53807e-11	0.233058	0.926	0.709	0.217	7.96595e-07	3_Prolif
Podnl1	3.56675e-11	-0.525504	0.027	0.228	-0.201	8.03053e-07	3_Prolif
Matn4	3.60686e-11	0.276	0.957	0.717	0.24	8.12084e-07	3_Prolif
Rps4x	3.805e-11	0.207611	1	0.999	0.001	8.56697e-07	3_Prolif
Laptm4a	3.96545e-11	-0.257957	1	0.992	0.008	8.92822e-07	3_Prolif
Fos	4.15382e-11	0.539149	0.995	0.9	0.095	9.35233e-07	3_Prolif
Dnajc8	4.16549e-11	0.227043	0.91	0.75	0.16	9.3786e-07	3_Prolif
Cxcl12	4.36847e-11	-3.15776	0.08	0.287	-0.207	9.8356e-07	3_Prolif
Slc36a2	4.48861e-11	-0.451497	0.011	0.208	-0.197	1.01061e-06	3_Prolif
Ipo5	4.53845e-11	0.242196	0.883	0.657	0.226	1.02183e-06	3_Prolif
Tm4sf1	4.67947e-11	-0.615001	0.176	0.379	-0.203	1.05358e-06	3_Prolif
Ndufab1	4.72141e-11	0.267009	0.989	0.876	0.113	1.06302e-06	3_Prolif
Cdk2ap1	5.03811e-11	0.267871	0.968	0.871	0.097	1.13433e-06	3_Prolif
Ogn	5.42279e-11	-0.827025	0.144	0.345	-0.201	1.22094e-06	3_Prolif
B230219D22Rik	5.82329e-11	0.206294	0.793	0.537	0.256	1.31111e-06	3_Prolif
Bola2	5.90659e-11	0.251386	0.92	0.683	0.237	1.32987e-06	3_Prolif
Mphosph6	6.51647e-11	0.230645	0.867	0.581	0.286	1.46718e-06	3_Prolif
Rpl3	6.53534e-11	0.212305	1	1	0	1.47143e-06	3_Prolif
Tardbp	6.55275e-11	0.231547	0.936	0.688	0.248	1.47535e-06	3_Prolif
Caprin1	6.84804e-11	0.239381	0.899	0.685	0.214	1.54184e-06	3_Prolif
Papss2	7.32255e-11	0.317098	0.995	0.715	0.28	1.64867e-06	3_Prolif
Nop58	7.60371e-11	0.236107	0.931	0.802	0.129	1.71198e-06	3_Prolif
Pard6g	7.61335e-11	-0.505304	0.149	0.342	-0.193	1.71415e-06	3_Prolif
Arpp19	7.75451e-11	0.275365	0.931	0.799	0.132	1.74593e-06	3_Prolif
Cox7a2	7.99428e-11	0.230601	1	0.974	0.026	1.79991e-06	3_Prolif
Cggbp1	8.29847e-11	0.223768	0.931	0.676	0.255	1.8684e-06	3_Prolif
Ppp1r15a	8.42612e-11	-0.492573	0.702	0.765	-0.063	1.89714e-06	3_Prolif
Snrpd2	8.61333e-11	0.234367	0.995	0.93	0.065	1.93929e-06	3_Prolif
Cbfb	8.799e-11	0.230106	0.883	0.624	0.259	1.9811e-06	3_Prolif
Plxna2	1.09783e-10	-0.616147	0.064	0.264	-0.2	2.47177e-06	3_Prolif
Unc5c	1.10064e-10	0.203117	0.883	0.613	0.27	2.47809e-06	3_Prolif
Ndufa1	1.1853e-10	-0.363404	0.883	0.854	0.029	2.6687e-06	3_Prolif
Calm2	1.24032e-10	0.369251	1	0.971	0.029	2.79258e-06	3_Prolif
Igfbp4	1.24458e-10	-2.30018	0.335	0.475	-0.14	2.80218e-06	3_Prolif
Stox2	1.26243e-10	-0.418835	0.069	0.267	-0.198	2.84237e-06	3_Prolif
Larp4b	1.29164e-10	0.228196	0.867	0.618	0.249	2.90813e-06	3_Prolif
Tubb2a	1.43105e-10	0.219565	0.968	0.773	0.195	3.222e-06	3_Prolif
Mrpl17	1.45716e-10	0.257154	0.968	0.781	0.187	3.28079e-06	3_Prolif
Ift20	1.50517e-10	-0.432476	0.968	0.893	0.075	3.38889e-06	3_Prolif
Rps2	1.52945e-10	0.210152	1	1	0	3.44356e-06	3_Prolif
Rpl12	1.57892e-10	0.217047	1	0.998	0.002	3.55493e-06	3_Prolif
Cisd1	1.6109e-10	0.266322	0.888	0.638	0.25	3.62694e-06	3_Prolif
Mtx1	1.74583e-10	0.21832	0.894	0.619	0.275	3.93073e-06	3_Prolif
Rpl18a	1.76419e-10	0.201907	1	1	0	3.97208e-06	3_Prolif
Mt1	1.80201e-10	0.299965	0.894	0.674	0.22	4.05722e-06	3_Prolif
Plod1	1.83944e-10	0.236522	0.941	0.706	0.235	4.14149e-06	3_Prolif
Selenop	1.88061e-10	-0.535514	0.09	0.289	-0.199	4.23419e-06	3_Prolif
Luc7l2	1.91451e-10	0.229319	1	0.941	0.059	4.31053e-06	3_Prolif
Slc35b2	1.93713e-10	0.278694	0.968	0.772	0.196	4.36145e-06	3_Prolif
Col13a1	2.00697e-10	-0.489787	0.027	0.217	-0.19	4.5187e-06	3_Prolif
Errfi1	2.09838e-10	-0.74284	0.686	0.804	-0.118	4.72449e-06	3_Prolif
Cycs	2.10722e-10	0.252534	0.957	0.85	0.107	4.7444e-06	3_Prolif
H2-D1	2.14659e-10	-0.790109	0.372	0.499	-0.127	4.83305e-06	3_Prolif
Cebpb	2.26435e-10	-0.721518	0.787	0.83	-0.043	5.09818e-06	3_Prolif
Ergic3	2.37591e-10	-0.338172	0.926	0.88	0.046	5.34936e-06	3_Prolif
Npm3	2.41066e-10	0.210916	0.803	0.547	0.256	5.4276e-06	3_Prolif
Fgfr1	2.49747e-10	-0.625563	0.787	0.755	0.032	5.62306e-06	3_Prolif
Tspan31	2.50011e-10	-0.346894	0.532	0.63	-0.098	5.629e-06	3_Prolif
Tbx2	2.88529e-10	-0.345726	0.021	0.207	-0.186	6.49624e-06	3_Prolif
Metrnl	2.93766e-10	-0.601815	0.282	0.442	-0.16	6.61415e-06	3_Prolif
Anxa1	2.94752e-10	-0.92048	0.617	0.663	-0.046	6.63633e-06	3_Prolif
Sec61a1	2.96917e-10	-0.382692	0.92	0.903	0.017	6.68508e-06	3_Prolif
Purb	3.09413e-10	0.228931	0.989	0.87	0.119	6.96643e-06	3_Prolif
Ppfibp2	3.12295e-10	-0.34357	0.027	0.214	-0.187	7.03133e-06	3_Prolif
Ahnak	3.4068e-10	-0.494411	0.941	0.909	0.032	7.67042e-06	3_Prolif
Nbl1	3.51949e-10	-0.351738	0.037	0.227	-0.19	7.92413e-06	3_Prolif
40057	3.55007e-10	0.200943	0.947	0.665	0.282	7.99298e-06	3_Prolif
Nupr1	3.80329e-10	-1.26858	0.612	0.686	-0.074	8.56311e-06	3_Prolif
Sfrp4	3.87296e-10	-0.597139	0.021	0.205	-0.184	8.71998e-06	3_Prolif
Fosb	4.11612e-10	-0.586069	0.899	0.93	-0.031	9.26744e-06	3_Prolif
Emc6	4.43112e-10	0.221834	0.92	0.665	0.255	9.97668e-06	3_Prolif
Malat1	4.59135e-10	-0.562507	1	0.999	0.001	1.03374e-05	3_Prolif
Brd8	4.74683e-10	0.215753	0.787	0.527	0.26	1.06875e-05	3_Prolif
Ybx3	5.04426e-10	0.274958	0.952	0.785	0.167	1.13571e-05	3_Prolif
Lum	5.08168e-10	-0.849092	0.979	0.899	0.08	1.14414e-05	3_Prolif
2310022B05Rik	5.09581e-10	-0.439133	0.559	0.619	-0.06	1.14732e-05	3_Prolif
Sobp	5.22652e-10	0.22362	0.894	0.613	0.281	1.17675e-05	3_Prolif
Arid5b	5.4285e-10	-0.417567	0.218	0.401	-0.183	1.22223e-05	3_Prolif
Thrap3	5.56851e-10	0.262677	0.91	0.779	0.131	1.25375e-05	3_Prolif
Ctsk	5.78913e-10	-0.556318	0.479	0.578	-0.099	1.30342e-05	3_Prolif
Pdlim2	6.04575e-10	-0.388295	0.053	0.241	-0.188	1.3612e-05	3_Prolif
S100a13	6.16558e-10	-0.49093	0.872	0.839	0.033	1.38818e-05	3_Prolif
Nudt5	6.17323e-10	0.203619	0.798	0.521	0.277	1.3899e-05	3_Prolif
Srebf2	6.77099e-10	0.214079	0.899	0.627	0.272	1.52449e-05	3_Prolif
Ubc	6.87068e-10	-0.415981	0.995	0.995	0	1.54693e-05	3_Prolif
Cdc42	6.95881e-10	-0.304998	0.989	0.958	0.031	1.56678e-05	3_Prolif
Kdm5b	7.0575e-10	-0.360567	0.362	0.536	-0.174	1.589e-05	3_Prolif
Pdgfc	7.23973e-10	-0.29037	0.027	0.207	-0.18	1.63003e-05	3_Prolif
Timm17a	7.38338e-10	0.239958	0.91	0.717	0.193	1.66237e-05	3_Prolif
Scara3	7.53404e-10	-0.678112	0.255	0.408	-0.153	1.69629e-05	3_Prolif
Jak1	7.56024e-10	-0.525911	0.606	0.673	-0.067	1.70219e-05	3_Prolif
Nfkbiz	7.68821e-10	-0.625505	0.431	0.556	-0.125	1.731e-05	3_Prolif
Klf9	7.94298e-10	-0.486868	0.649	0.698	-0.049	1.78836e-05	3_Prolif
Med13	8.34104e-10	-0.388444	0.521	0.614	-0.093	1.87798e-05	3_Prolif
Bach1	8.51563e-10	-0.407745	0.356	0.52	-0.164	1.91729e-05	3_Prolif
Sfxn1	8.78434e-10	0.219146	0.846	0.597	0.249	1.9778e-05	3_Prolif
Rasl11a	8.9415e-10	-0.651734	0.09	0.283	-0.193	2.01318e-05	3_Prolif
Map7d1	8.99039e-10	-0.385023	0.686	0.713	-0.027	2.02419e-05	3_Prolif
Cpsf6	9.1659e-10	0.217728	0.867	0.623	0.244	2.0637e-05	3_Prolif
Xylt1	1.02262e-09	0.229683	0.984	0.639	0.345	2.30243e-05	3_Prolif
Ssr3	1.03435e-09	-0.305564	0.957	0.97	-0.013	2.32883e-05	3_Prolif
Fam120a	1.10455e-09	0.231042	0.984	0.737	0.247	2.48689e-05	3_Prolif
S100b	1.10769e-09	0.246254	0.984	0.662	0.322	2.49395e-05	3_Prolif
Clk1	1.12178e-09	-0.421696	0.793	0.807	-0.014	2.52568e-05	3_Prolif
Mmp23	1.28227e-09	-0.529258	0.191	0.364	-0.173	2.88704e-05	3_Prolif
Fam104a	1.2919e-09	0.249949	0.984	0.857	0.127	2.90872e-05	3_Prolif
Slc7a1	1.34529e-09	0.229549	0.846	0.607	0.239	3.02893e-05	3_Prolif
Cspg4	1.42968e-09	0.212967	1	0.76	0.24	3.21891e-05	3_Prolif
Rai14	1.43573e-09	-0.510359	0.197	0.369	-0.172	3.23254e-05	3_Prolif
mt-Nd4	1.48733e-09	-0.343233	1	1	0	3.34873e-05	3_Prolif
Casc4	1.50488e-09	0.236625	0.915	0.68	0.235	3.38824e-05	3_Prolif
Oxct1	1.59319e-09	0.244973	0.883	0.68	0.203	3.58707e-05	3_Prolif
Tmem30a	1.63771e-09	0.26551	0.973	0.77	0.203	3.68731e-05	3_Prolif
Zfp644	1.67639e-09	0.219438	0.83	0.584	0.246	3.77439e-05	3_Prolif
Omd	1.71516e-09	-0.591871	0.122	0.314	-0.192	3.86169e-05	3_Prolif
Thbs2	1.7182e-09	-0.460505	0.154	0.343	-0.189	3.86852e-05	3_Prolif
Rasgrp2	1.74787e-09	-0.492551	0.064	0.246	-0.182	3.93533e-05	3_Prolif
Vim	1.85804e-09	-0.786337	1	0.972	0.028	4.18338e-05	3_Prolif
Hp1bp3	2.02887e-09	0.274678	0.862	0.632	0.23	4.568e-05	3_Prolif
Ugdh	2.09412e-09	0.227813	0.995	0.868	0.127	4.71492e-05	3_Prolif
Sox9	2.14501e-09	0.218032	1	0.812	0.188	4.82949e-05	3_Prolif
Ccdc12	2.16257e-09	-0.473779	0.537	0.599	-0.062	4.86902e-05	3_Prolif
Maged1	2.30925e-09	-0.376644	0.984	0.961	0.023	5.19928e-05	3_Prolif
Epas1	2.31235e-09	-0.56162	0.085	0.269	-0.184	5.20626e-05	3_Prolif
Dcn	2.49327e-09	-1.49495	0.936	0.866	0.07	5.6136e-05	3_Prolif
Rps6	2.55412e-09	0.208747	1	0.997	0.003	5.7506e-05	3_Prolif
Pappa	2.56452e-09	-0.713717	0.096	0.273	-0.177	5.77402e-05	3_Prolif
U2surp	2.67455e-09	0.216074	0.91	0.693	0.217	6.02176e-05	3_Prolif
Ddx39b	2.73514e-09	0.24184	0.989	0.882	0.107	6.15816e-05	3_Prolif
Acaa1a	2.76277e-09	-0.320779	0.548	0.62	-0.072	6.22037e-05	3_Prolif
Ggh	2.78258e-09	-0.372694	0.41	0.524	-0.114	6.26498e-05	3_Prolif
Rpl22	2.82154e-09	0.202371	1	0.996	0.004	6.35269e-05	3_Prolif
Ptms	2.93066e-09	0.324875	0.989	0.929	0.06	6.59838e-05	3_Prolif
Mrpl33	2.94894e-09	0.210054	0.989	0.905	0.084	6.63955e-05	3_Prolif
Cct2	3.11632e-09	0.246191	0.984	0.924	0.06	7.0164e-05	3_Prolif
App	3.2769e-09	-0.349692	0.989	0.971	0.018	7.37793e-05	3_Prolif
Cdc123	3.32798e-09	0.202363	0.819	0.574	0.245	7.49295e-05	3_Prolif
Slc35d1	3.51916e-09	0.210702	0.904	0.607	0.297	7.92339e-05	3_Prolif
Eif2s1	3.98727e-09	0.206213	0.851	0.618	0.233	8.97734e-05	3_Prolif
Dnaja1	3.98771e-09	-0.598153	0.899	0.922	-0.023	8.97832e-05	3_Prolif
Podxl2	4.11338e-09	-0.330826	0.09	0.269	-0.179	9.26129e-05	3_Prolif
Pth1r	4.19909e-09	-0.835599	0.878	0.849	0.029	9.45424e-05	3_Prolif
Car3	4.54415e-09	-1.12642	0.037	0.207	-0.17	0.000102312	3_Prolif
Spop	4.59878e-09	0.208958	0.92	0.666	0.254	0.000103541	3_Prolif
Egr1	4.7035e-09	0.481858	0.952	0.918	0.034	0.000105899	3_Prolif
P4ha1	4.97258e-09	0.26594	1	0.826	0.174	0.000111958	3_Prolif
Anp32a	5.04209e-09	0.201613	0.947	0.739	0.208	0.000113523	3_Prolif
Kctd12	5.05373e-09	-0.892359	0.287	0.426	-0.139	0.000113785	3_Prolif
Foxp1	5.14054e-09	-0.525811	0.213	0.385	-0.172	0.000115739	3_Prolif
Arpc1b	5.56196e-09	-0.500881	0.883	0.87	0.013	0.000125228	3_Prolif
Rnh1	6.07599e-09	-0.341693	0.771	0.771	0	0.000136801	3_Prolif
Lman2	6.08556e-09	0.201581	0.952	0.774	0.178	0.000137016	3_Prolif
Arl6ip5	6.15686e-09	-0.344369	0.399	0.507	-0.108	0.000138622	3_Prolif
Sec31a	6.67416e-09	-0.3174	0.926	0.875	0.051	0.000150269	3_Prolif
Wsb1	7.07115e-09	-0.584173	0.713	0.713	0	0.000159207	3_Prolif
Cox7b	7.38348e-09	-0.287561	0.963	0.927	0.036	0.000166239	3_Prolif
Pebp1	7.48506e-09	0.229883	1	0.97	0.03	0.000168526	3_Prolif
Tspan3	7.72277e-09	0.214593	0.995	0.935	0.06	0.000173878	3_Prolif
Mylk	7.83622e-09	-0.397871	0.043	0.214	-0.171	0.000176433	3_Prolif
Ung	8.25802e-09	0.222393	0.34	0.178	0.162	0.000185929	3_Prolif
Col9a2	8.36425e-09	0.527271	1	0.824	0.176	0.000188321	3_Prolif
Smarca5	9.07891e-09	0.224694	0.936	0.806	0.13	0.000204412	3_Prolif
Cgref1	9.09517e-09	-0.786715	0.388	0.491	-0.103	0.000204778	3_Prolif
Ptpn13	9.12698e-09	-0.33131	0.085	0.256	-0.171	0.000205494	3_Prolif
Myo1b	9.77852e-09	-0.439397	0.17	0.339	-0.169	0.000220163	3_Prolif
Maff	1.00407e-08	-0.469428	0.42	0.557	-0.137	0.000226065	3_Prolif
Pafah1b3	1.01242e-08	0.203165	0.846	0.591	0.255	0.000227946	3_Prolif
Capn6	1.02616e-08	0.212737	0.957	0.705	0.252	0.000231039	3_Prolif
Bgn	1.02886e-08	-0.560581	0.995	0.981	0.014	0.000231649	3_Prolif
Dst	1.04781e-08	-0.378145	0.457	0.544	-0.087	0.000235914	3_Prolif
Mrpl12	1.06575e-08	0.205499	0.872	0.67	0.202	0.000239953	3_Prolif
Gxylt2	1.13414e-08	-0.546309	0.367	0.482	-0.115	0.000255351	3_Prolif
Zcchc14	1.18301e-08	-0.460442	0.41	0.518	-0.108	0.000266355	3_Prolif
Myo10	1.20366e-08	-0.507754	0.415	0.51	-0.095	0.000271003	3_Prolif
Kcnq1ot1	1.2184e-08	0.287239	0.973	0.833	0.14	0.000274322	3_Prolif
Mcl1	1.22808e-08	-0.3827	0.931	0.913	0.018	0.000276502	3_Prolif
Epdr1	1.40208e-08	-0.453665	0.255	0.408	-0.153	0.000315679	3_Prolif
Atp5h	1.52229e-08	-0.237632	0.995	0.981	0.014	0.000342743	3_Prolif
Sulf1	1.52236e-08	-0.434605	0.059	0.227	-0.168	0.00034276	3_Prolif
Ccdc88a	1.63453e-08	0.243175	0.952	0.778	0.174	0.000368015	3_Prolif
Agpat3	1.91678e-08	-0.274095	0.096	0.264	-0.168	0.000431563	3_Prolif
Calm1	2.04666e-08	-0.32487	0.995	0.978	0.017	0.000460805	3_Prolif
Ddah2	2.06079e-08	-0.423266	0.096	0.262	-0.166	0.000463986	3_Prolif
Hp	2.11552e-08	-1.03687	0.059	0.221	-0.162	0.00047631	3_Prolif
Gspt1	2.23124e-08	0.224359	0.931	0.746	0.185	0.000502364	3_Prolif
Prpf40a	2.35179e-08	0.200905	0.947	0.794	0.153	0.000529506	3_Prolif
mt-Co2	2.45794e-08	-0.373794	1	1	0	0.000553406	3_Prolif
Polr2f	2.49691e-08	0.23329	0.931	0.83	0.101	0.00056218	3_Prolif
Chchd2	2.54459e-08	-0.204025	1	0.995	0.005	0.000572914	3_Prolif
Bcar3	2.57501e-08	-0.212251	0.053	0.216	-0.163	0.000579763	3_Prolif
Atp5d	2.70986e-08	-0.266703	0.995	0.973	0.022	0.000610125	3_Prolif
Pdgfa	2.7599e-08	-0.464128	0.324	0.483	-0.159	0.000621392	3_Prolif
Fam129a	2.89145e-08	-0.280516	0.053	0.214	-0.161	0.000651011	3_Prolif
Col22a1	3.23703e-08	-0.819464	0.048	0.207	-0.159	0.000728818	3_Prolif
Taf10	3.29458e-08	0.204258	0.968	0.826	0.142	0.000741774	3_Prolif
Sema6d	3.39931e-08	-0.306126	0.064	0.229	-0.165	0.000765355	3_Prolif
Ufc1	3.42174e-08	-0.276893	0.92	0.871	0.049	0.000770404	3_Prolif
Psme4	3.4416e-08	-0.348916	0.59	0.636	-0.046	0.000774877	3_Prolif
Pdap1	4.01647e-08	0.207708	0.984	0.881	0.103	0.000904308	3_Prolif
Myo1d	4.05776e-08	-0.227814	0.144	0.313	-0.169	0.000913605	3_Prolif
Klf7	4.0584e-08	0.215431	0.819	0.58	0.239	0.000913748	3_Prolif
2700038G22Rik	4.08664e-08	0.240582	0.431	0.249	0.182	0.000920107	3_Prolif
Gale	4.2295e-08	0.207944	0.867	0.56	0.307	0.000952271	3_Prolif
Adamts9	4.28253e-08	-0.566491	0.293	0.42	-0.127	0.000964212	3_Prolif
Tprgl	4.63322e-08	-0.293376	0.495	0.577	-0.082	0.00104317	3_Prolif
Ptprs	4.88889e-08	-0.718299	0.755	0.701	0.054	0.00110073	3_Prolif
Grina	5.08049e-08	-0.283472	0.106	0.268	-0.162	0.00114387	3_Prolif
Psmd8	5.09758e-08	-0.370523	0.904	0.849	0.055	0.00114772	3_Prolif
Etl4	5.11029e-08	-0.227616	0.048	0.203	-0.155	0.00115058	3_Prolif
Vasp	5.22443e-08	-0.357308	0.346	0.48	-0.134	0.00117628	3_Prolif
Nr4a2	5.23088e-08	-0.561166	0.378	0.488	-0.11	0.00117773	3_Prolif
Pls3	5.38093e-08	-0.354537	0.335	0.481	-0.146	0.00121152	3_Prolif
Cd302	5.54757e-08	-0.54362	0.649	0.656	-0.007	0.00124904	3_Prolif
Mpc2	5.68391e-08	-0.312676	0.851	0.824	0.027	0.00127973	3_Prolif
Gamt	6.00377e-08	-0.321988	0.144	0.301	-0.157	0.00135175	3_Prolif
Cox14	6.07346e-08	0.209233	0.952	0.803	0.149	0.00136744	3_Prolif
Elmo1	6.18354e-08	-0.276899	0.074	0.233	-0.159	0.00139222	3_Prolif
Pbx1	6.38256e-08	-0.380896	0.245	0.407	-0.162	0.00143703	3_Prolif
Ubxn4	6.44166e-08	-0.289554	0.867	0.819	0.048	0.00145034	3_Prolif
Tsc22d2	6.68644e-08	-0.372396	0.335	0.481	-0.146	0.00150545	3_Prolif
Pim1	6.69658e-08	-0.594148	0.521	0.59	-0.069	0.00150773	3_Prolif
Cblb	6.90624e-08	-0.223696	0.064	0.223	-0.159	0.00155494	3_Prolif
2004-09-01	6.92249e-08	-0.299384	0.074	0.231	-0.157	0.0015586	3_Prolif
Bag3	7.22762e-08	-0.34755	0.622	0.676	-0.054	0.0016273	3_Prolif
Efna5	7.38464e-08	-0.44617	0.085	0.244	-0.159	0.00166265	3_Prolif
Pdlim5	7.70601e-08	-0.357235	0.218	0.367	-0.149	0.00173501	3_Prolif
Ubxn6	8.66905e-08	-0.287701	0.537	0.589	-0.052	0.00195184	3_Prolif
Irx5	8.92363e-08	-0.317885	0.09	0.249	-0.159	0.00200916	3_Prolif
Scarf2	1.0338e-07	-0.430419	0.782	0.768	0.014	0.00232761	3_Prolif
2002-03-01	1.07003e-07	-0.302384	0.569	0.618	-0.049	0.00240918	3_Prolif
Bmp2k	1.07601e-07	-0.34279	0.181	0.339	-0.158	0.00242264	3_Prolif
Antxr2	1.10574e-07	-0.305334	0.186	0.337	-0.151	0.00248958	3_Prolif
Tmem5	1.11553e-07	-0.290919	0.628	0.655	-0.027	0.00251161	3_Prolif
BC005537	1.12194e-07	-0.353587	0.91	0.877	0.033	0.00252606	3_Prolif
Rbbp4	1.13751e-07	0.211297	0.814	0.636	0.178	0.00256109	3_Prolif
Clta	1.14347e-07	-0.294342	0.989	0.951	0.038	0.00257453	3_Prolif
Cdk5rap3	1.21162e-07	-0.283899	0.59	0.632	-0.042	0.00272796	3_Prolif
Cacybp	1.22113e-07	0.21297	0.91	0.71	0.2	0.00274937	3_Prolif
1810058I24Rik	1.24359e-07	0.224285	0.995	0.913	0.082	0.00279994	3_Prolif
Tmbim6	1.2695e-07	-0.339326	0.957	0.885	0.072	0.00285827	3_Prolif
Neat1	1.36111e-07	-0.717676	0.973	0.946	0.027	0.00306453	3_Prolif
Hapln1	1.37898e-07	0.201956	1	0.816	0.184	0.00310477	3_Prolif
Trappc2l	1.38079e-07	-0.273205	0.638	0.653	-0.015	0.00310885	3_Prolif
Jmjd1c	1.40569e-07	-0.383964	0.814	0.798	0.016	0.00316492	3_Prolif
Dnajb4	1.50048e-07	-0.362279	0.287	0.42	-0.133	0.00337833	3_Prolif
Fkbp9	1.52943e-07	0.225282	1	0.964	0.036	0.00344351	3_Prolif
Ndufa5	1.54459e-07	0.200344	0.973	0.84	0.133	0.00347765	3_Prolif
Chka	1.5791e-07	-0.55519	0.527	0.575	-0.048	0.00355535	3_Prolif
Hbp1	1.59035e-07	-0.345089	0.468	0.56	-0.092	0.00358067	3_Prolif
Ptgs2	1.67894e-07	-0.650746	0.09	0.246	-0.156	0.00378013	3_Prolif
Wipi1	1.75933e-07	-0.305315	0.532	0.605	-0.073	0.00396114	3_Prolif
Acan	1.8373e-07	0.514228	1	0.841	0.159	0.00413667	3_Prolif
Ube2f	1.93239e-07	-0.287556	0.447	0.527	-0.08	0.00435077	3_Prolif
Lmo4	2.0113e-07	-0.42111	0.649	0.7	-0.051	0.00452844	3_Prolif
Stat3	2.1979e-07	-0.33226	0.872	0.845	0.027	0.00494857	3_Prolif
Col25a1	2.29412e-07	-0.238071	0.064	0.214	-0.15	0.00516522	3_Prolif
Ndufa11	2.33224e-07	-0.299477	0.899	0.863	0.036	0.00525105	3_Prolif
Midn	2.34297e-07	-0.348946	0.441	0.551	-0.11	0.00527519	3_Prolif
Yif1a	2.36898e-07	-0.309904	0.851	0.773	0.078	0.00533376	3_Prolif
Mgst3	2.44386e-07	-0.253836	0.101	0.259	-0.158	0.00550236	3_Prolif
Cebpd	2.59098e-07	-0.616526	0.734	0.708	0.026	0.00583358	3_Prolif
Foxn3	2.65394e-07	-0.515243	0.58	0.616	-0.036	0.00597534	3_Prolif
Ddx5	2.74883e-07	-0.330075	0.995	0.997	-0.002	0.006189	3_Prolif
Rbp1	2.88833e-07	-0.417053	0.085	0.233	-0.148	0.00650307	3_Prolif
Pld3	2.89993e-07	-0.274521	0.324	0.451	-0.127	0.0065292	3_Prolif
Cdkn1a	2.93646e-07	-0.547854	0.83	0.837	-0.007	0.00661143	3_Prolif
H1f0	3.07652e-07	0.446277	0.899	0.775	0.124	0.00692677	3_Prolif
Aqp1	3.09033e-07	-0.367203	0.096	0.246	-0.15	0.00695787	3_Prolif
Furin	3.14751e-07	-0.291104	0.697	0.7	-0.003	0.00708662	3_Prolif
Sgpl1	3.35333e-07	-0.238491	0.16	0.314	-0.154	0.00755002	3_Prolif
Nfkb1	3.4228e-07	-0.51027	0.489	0.58	-0.091	0.00770644	3_Prolif
Bicc1	3.77302e-07	-0.595116	0.569	0.624	-0.055	0.00849496	3_Prolif
Inppl1	3.79139e-07	-0.290325	0.213	0.352	-0.139	0.00853633	3_Prolif
Itgb1	4.01031e-07	-0.40576	0.979	0.949	0.03	0.00902922	3_Prolif
Lrp1	4.14227e-07	-0.364827	0.926	0.911	0.015	0.00932633	3_Prolif
Adam12	4.21591e-07	-0.450029	0.234	0.36	-0.126	0.00949211	3_Prolif
Bglap2	4.3346e-07	-2.71834	0.09	0.237	-0.147	0.00975935	3_Prolif
Clec11a	4.3852e-07	0.282198	0.973	0.85	0.123	0.00987329	3_Prolif
Cmtm3	4.47427e-07	-0.36738	0.085	0.23	-0.145	0.0100738	3_Prolif
Plxnd1	4.50782e-07	-0.398014	0.122	0.264	-0.142	0.0101494	3_Prolif
Txnip	4.53485e-07	0.20638	0.766	0.542	0.224	0.0102102	3_Prolif
Rnase4	4.61719e-07	-0.277548	0.117	0.268	-0.151	0.0103956	3_Prolif
Cyba	4.96008e-07	-0.435321	0.559	0.601	-0.042	0.0111676	3_Prolif
Pik3r1	5.44491e-07	-0.470808	0.447	0.513	-0.066	0.0122592	3_Prolif
Saraf	5.65176e-07	-0.288804	0.894	0.804	0.09	0.0127249	3_Prolif
Ifngr2	5.65574e-07	-0.307885	0.138	0.284	-0.146	0.0127339	3_Prolif
Ppp1r14b	5.65994e-07	-0.29725	0.947	0.913	0.034	0.0127434	3_Prolif
Nucb1	5.70623e-07	-0.264824	0.936	0.903	0.033	0.0128476	3_Prolif
Insig2	5.90697e-07	-0.452662	0.346	0.444	-0.098	0.0132995	3_Prolif
Cpz	6.17851e-07	-0.589134	0.069	0.209	-0.14	0.0139109	3_Prolif
Nradd	6.32488e-07	-0.257511	0.074	0.214	-0.14	0.0142405	3_Prolif
Fabp3	6.32502e-07	-0.272281	0.069	0.214	-0.145	0.0142408	3_Prolif
Rpl29	6.48143e-07	0.207064	1	0.993	0.007	0.0145929	3_Prolif
Fgfr2	6.70008e-07	-0.552287	0.378	0.474	-0.096	0.0150852	3_Prolif
Fam46a	6.73583e-07	-0.677004	0.628	0.657	-0.029	0.0151657	3_Prolif
Fis1	6.78174e-07	-0.272458	0.824	0.793	0.031	0.0152691	3_Prolif
Socs3	7.0426e-07	-0.649225	0.505	0.576	-0.071	0.0158564	3_Prolif
Rexo2	7.05468e-07	0.226644	0.952	0.806	0.146	0.0158836	3_Prolif
Gsk3b	7.22e-07	-0.414482	0.761	0.732	0.029	0.0162558	3_Prolif
Hmox1	7.68354e-07	-0.489745	0.319	0.43	-0.111	0.0172995	3_Prolif
Nrep	7.78406e-07	-0.489107	0.628	0.646	-0.018	0.0175258	3_Prolif
Clmp	7.79458e-07	-0.499039	0.394	0.482	-0.088	0.0175495	3_Prolif
D830025C05Rik	8.00454e-07	-0.295011	0.149	0.293	-0.144	0.0180222	3_Prolif
Arpc3	8.36973e-07	-0.263816	0.941	0.876	0.065	0.0188444	3_Prolif
Sertad2	8.42084e-07	-0.285896	0.67	0.682	-0.012	0.0189595	3_Prolif
Hspa5	8.48104e-07	-0.408793	1	0.996	0.004	0.0190951	3_Prolif
Rhoc	8.48651e-07	-0.462784	0.75	0.708	0.042	0.0191074	3_Prolif
Col2a1	8.69061e-07	0.421935	1	0.996	0.004	0.0195669	3_Prolif
Atp6v0d1	1.04437e-06	-0.282376	0.569	0.601	-0.032	0.0235141	3_Prolif
Trim8	1.04854e-06	-0.263482	0.176	0.308	-0.132	0.023608	3_Prolif
Mfap2	1.0591e-06	-0.716909	0.574	0.593	-0.019	0.0238457	3_Prolif
AY036118	1.10462e-06	-0.433154	0.75	0.775	-0.025	0.0248705	3_Prolif
Gpr153	1.12328e-06	-0.358517	0.351	0.449	-0.098	0.0252906	3_Prolif
Rgcc	1.18864e-06	-0.819044	0.718	0.719	-0.001	0.0267622	3_Prolif
Snta1	1.29765e-06	-0.235143	0.191	0.332	-0.141	0.0292165	3_Prolif
Rsrp1	1.35509e-06	-0.577496	0.803	0.762	0.041	0.0305099	3_Prolif
Fth1	1.44731e-06	-0.458033	1	0.996	0.004	0.0325861	3_Prolif
Atox1	1.53534e-06	-0.270432	0.957	0.918	0.039	0.0345682	3_Prolif
Arf5	1.5907e-06	-0.269189	0.989	0.984	0.005	0.0358146	3_Prolif
H2-K1	1.68839e-06	-0.545733	0.622	0.646	-0.024	0.0380141	3_Prolif
Mmp2	1.72566e-06	-0.466608	0.968	0.883	0.085	0.0388532	3_Prolif
St6galnac6	1.73221e-06	-0.292767	0.335	0.444	-0.109	0.0390006	3_Prolif
Ndufb2	1.81345e-06	-0.289089	0.926	0.871	0.055	0.0408298	3_Prolif
Marveld1	1.82232e-06	-0.266626	0.521	0.563	-0.042	0.0410296	3_Prolif
Hexim1	1.87212e-06	-0.35599	0.441	0.521	-0.08	0.0421508	3_Prolif
Fstl1	1.88162e-06	-1.37796	0.676	0.688	-0.012	0.0423648	3_Prolif
Psmc4	1.91036e-06	0.225986	0.888	0.74	0.148	0.0430118	3_Prolif
Pfdn5	2.05134e-06	-0.212718	0.989	0.98	0.009	0.0461859	3_Prolif
Top1	2.08779e-06	-0.334899	0.941	0.919	0.022	0.0470065	3_Prolif
Dstn	2.12414e-06	-0.354051	0.989	0.966	0.023	0.047825	3_Prolif
Borcs8	2.17626e-06	-0.247978	0.473	0.539	-0.066	0.0489986	3_Prolif
Rnaset2b	2.17835e-06	-0.309965	0.66	0.651	0.009	0.0490456	3_Prolif
Cd47	2.20841e-06	-0.324211	0.739	0.746	-0.007	0.0497223	3_Prolif
Cox6b1	2.22607e-06	-0.207322	0.995	0.972	0.023	0.0501199	3_Prolif
Jtb	2.2708e-06	-0.277589	0.606	0.605	0.001	0.051127	3_Prolif
Tspan13	2.32488e-06	-0.275637	0.117	0.26	-0.143	0.0523448	3_Prolif
Psme2	2.66752e-06	-0.31748	0.516	0.557	-0.041	0.0600592	3_Prolif
Dync1h1	2.70859e-06	-0.315754	0.697	0.696	0.001	0.0609839	3_Prolif
Ctsa	2.92512e-06	-0.28474	0.761	0.702	0.059	0.065859	3_Prolif
Chmp2a	3.01015e-06	-0.259429	0.894	0.815	0.079	0.0677736	3_Prolif
Rgs2	3.07678e-06	-0.350321	0.117	0.252	-0.135	0.0692737	3_Prolif
Grb14	3.07979e-06	-0.293202	0.218	0.354	-0.136	0.0693415	3_Prolif
Fads3	3.11061e-06	-0.29575	0.362	0.459	-0.097	0.0700353	3_Prolif
Tcn2	3.11197e-06	-0.30628	0.277	0.389	-0.112	0.0700661	3_Prolif
Nav1	3.69982e-06	-0.368536	0.271	0.385	-0.114	0.0833015	3_Prolif
Wdr26	3.86638e-06	-0.298052	0.819	0.76	0.059	0.0870515	3_Prolif
Ube2r2	3.88821e-06	-0.304706	0.638	0.66	-0.022	0.0875431	3_Prolif
Tob1	3.89608e-06	-0.306566	0.67	0.665	0.005	0.0877202	3_Prolif
Macf1	3.90016e-06	-0.34078	0.644	0.655	-0.011	0.0878122	3_Prolif
Itm2c	3.93669e-06	-0.297239	0.899	0.842	0.057	0.0886346	3_Prolif
Kmt5b	4.33181e-06	-0.251126	0.303	0.41	-0.107	0.0975306	3_Prolif
Col9a3	4.46427e-06	0.49278	1	0.863	0.137	0.100513	3_Prolif
Chmp4b	4.4764e-06	-0.2884	0.814	0.787	0.027	0.100786	3_Prolif
Ufm1	4.87012e-06	-0.257106	0.846	0.777	0.069	0.109651	3_Prolif
Lama4	5.06968e-06	-0.351878	0.213	0.331	-0.118	0.114144	3_Prolif
Prcp	5.09869e-06	-0.410486	0.223	0.336	-0.113	0.114797	3_Prolif
Gnai1	5.5283e-06	-0.237464	0.122	0.252	-0.13	0.12447	3_Prolif
Plscr3	6.09787e-06	-0.277058	0.207	0.326	-0.119	0.137294	3_Prolif
Emc10	6.20914e-06	-0.25181	0.941	0.901	0.04	0.139799	3_Prolif
Fbxl7	6.22567e-06	-0.28408	0.08	0.202	-0.122	0.140171	3_Prolif
Col27a1	6.45887e-06	0.210562	1	0.814	0.186	0.145421	3_Prolif
Leprotl1	6.87763e-06	-0.257644	0.564	0.58	-0.016	0.15485	3_Prolif
Timp1	7.16845e-06	-0.6645	0.883	0.846	0.037	0.161398	3_Prolif
Rnaset2a	7.18212e-06	-0.323932	0.707	0.67	0.037	0.161705	3_Prolif
Slc35b1	7.1916e-06	-0.29118	0.617	0.619	-0.002	0.161919	3_Prolif
Phlda3	7.37769e-06	-0.264054	0.117	0.242	-0.125	0.166109	3_Prolif
Slc38a2	8.20328e-06	-0.350004	0.984	0.947	0.037	0.184697	3_Prolif
Col3a1	8.40052e-06	-1.60196	0.644	0.672	-0.028	0.189138	3_Prolif
Lmna	8.40314e-06	-0.390849	0.968	0.922	0.046	0.189197	3_Prolif
Scand1	8.81343e-06	-0.294546	0.91	0.856	0.054	0.198434	3_Prolif
Picalm	9.1984e-06	-0.370967	0.638	0.64	-0.002	0.207102	3_Prolif
Mafb	9.81024e-06	-0.569567	0.388	0.474	-0.086	0.220878	3_Prolif
Clcn4	1.04105e-05	-0.29464	0.479	0.534	-0.055	0.234391	3_Prolif
Arhgef25	1.0476e-05	-0.249412	0.245	0.361	-0.116	0.235867	3_Prolif
Aff4	1.10098e-05	-0.262459	0.702	0.734	-0.032	0.247885	3_Prolif
Sh3bgrl3	1.11889e-05	-0.284777	0.814	0.757	0.057	0.251917	3_Prolif
Psmb5	1.1375e-05	-0.271302	0.941	0.897	0.044	0.256109	3_Prolif
Pink1	1.14269e-05	-0.233055	0.388	0.469	-0.081	0.257276	3_Prolif
Cd81	1.14933e-05	-0.302322	0.995	0.975	0.02	0.258772	3_Prolif
Rbms3	1.16392e-05	-0.365196	0.106	0.226	-0.12	0.262058	3_Prolif
Slc39a1	1.16622e-05	-0.325682	0.596	0.618	-0.022	0.262574	3_Prolif
Ube2h	1.21585e-05	-0.294805	0.527	0.568	-0.041	0.273749	3_Prolif
Sqstm1	1.22811e-05	-0.288054	0.739	0.716	0.023	0.27651	3_Prolif
Rgs3	1.23324e-05	-0.520153	0.803	0.748	0.055	0.277663	3_Prolif
Iscu	1.23454e-05	-0.287935	0.447	0.518	-0.071	0.277957	3_Prolif
Tgif1	1.23679e-05	-0.269303	0.138	0.261	-0.123	0.278464	3_Prolif
Txndc15	1.34087e-05	-0.254604	0.436	0.503	-0.067	0.301896	3_Prolif
Pros1	1.43604e-05	-0.501083	0.399	0.451	-0.052	0.323324	3_Prolif
Kdm5a	1.43783e-05	-0.279044	0.729	0.716	0.013	0.323727	3_Prolif
R3hdm4	1.4559e-05	-0.27307	0.569	0.599	-0.03	0.327797	3_Prolif
Rpl39l	1.47035e-05	-0.33265	0.176	0.324	-0.148	0.331049	3_Prolif
Trib1	1.47419e-05	-0.355951	0.394	0.516	-0.122	0.331914	3_Prolif
Plpp3	1.47891e-05	-0.495378	0.181	0.296	-0.115	0.332976	3_Prolif
Mkrn1	1.50042e-05	-0.267017	0.484	0.517	-0.033	0.33782	3_Prolif
Nr4a1	1.50684e-05	-0.482363	0.303	0.411	-0.108	0.339265	3_Prolif
Fbn1	1.52061e-05	-1.12019	0.197	0.302	-0.105	0.342366	3_Prolif
Agbl3	1.54484e-05	-0.33625	0.138	0.26	-0.122	0.34782	3_Prolif
Slc38a10	1.56269e-05	-0.312809	0.846	0.784	0.062	0.351839	3_Prolif
Serinc1	1.58403e-05	-0.230546	0.91	0.85	0.06	0.356645	3_Prolif
Ctsd	1.58451e-05	-0.344324	0.973	0.912	0.061	0.356752	3_Prolif
Col9a1	1.66399e-05	0.47751	1	0.859	0.141	0.374647	3_Prolif
Ctgf	1.84857e-05	-0.645987	0.867	0.851	0.016	0.416205	3_Prolif
Rbbp6	1.89407e-05	-0.328108	0.878	0.838	0.04	0.426449	3_Prolif
Sec61b	1.89477e-05	-0.296544	0.995	0.982	0.013	0.426608	3_Prolif
Adam10	1.91521e-05	-0.33377	0.271	0.373	-0.102	0.431209	3_Prolif
Ece1	2.01273e-05	-0.257252	0.106	0.225	-0.119	0.453167	3_Prolif
Ppp2r5a	2.11092e-05	-0.277184	0.452	0.504	-0.052	0.475274	3_Prolif
Frzb	2.13444e-05	-0.301103	0.165	0.289	-0.124	0.480569	3_Prolif
Serp1	2.26408e-05	-0.276946	0.984	0.9	0.084	0.509759	3_Prolif
Fuca1	2.38149e-05	-0.256322	0.707	0.707	0	0.536193	3_Prolif
Efnb1	2.50219e-05	-0.411025	0.484	0.524	-0.04	0.563367	3_Prolif
Ank	2.60405e-05	-0.334288	0.16	0.272	-0.112	0.586301	3_Prolif
Mef2c	2.74723e-05	-0.603978	0.809	0.729	0.08	0.61854	3_Prolif
Hba-a1	2.76708e-05	-1.31409	0.755	0.746	0.009	0.623008	3_Prolif
Ifngr1	2.78588e-05	-0.311701	0.335	0.416	-0.081	0.62724	3_Prolif
Ccs	2.99251e-05	-0.215291	0.457	0.527	-0.07	0.673764	3_Prolif
Tgfb1	3.01045e-05	-0.376815	0.654	0.648	0.006	0.677804	3_Prolif
Rbms1	3.12563e-05	-0.486006	0.543	0.564	-0.021	0.703736	3_Prolif
Acads	3.12661e-05	-0.231326	0.223	0.326	-0.103	0.703955	3_Prolif
Acaa2	3.13885e-05	-0.483742	0.394	0.447	-0.053	0.706711	3_Prolif
Clu	3.16084e-05	-0.513592	0.165	0.271	-0.106	0.711663	3_Prolif
Tcf25	3.16601e-05	-0.220949	0.947	0.883	0.064	0.712827	3_Prolif
Cpq	3.27998e-05	-0.349219	0.569	0.606	-0.037	0.738488	3_Prolif
Dap	3.28688e-05	-0.252142	0.984	0.925	0.059	0.740042	3_Prolif
Arl1	3.37631e-05	-0.205086	0.984	0.932	0.052	0.760176	3_Prolif
Raph1	3.63145e-05	-0.35139	0.91	0.845	0.065	0.817621	3_Prolif
Anxa3	3.63812e-05	-0.28218	0.149	0.267	-0.118	0.819123	3_Prolif
Gstm1	3.70855e-05	-0.225136	0.101	0.215	-0.114	0.834979	3_Prolif
Akt1s1	3.77622e-05	-0.210828	0.745	0.688	0.057	0.850216	3_Prolif
Esyt1	3.93562e-05	-0.25054	0.207	0.324	-0.117	0.886106	3_Prolif
Bmpr2	4.0187e-05	-0.266344	0.59	0.65	-0.06	0.904811	3_Prolif
Smarca1	4.09931e-05	-0.275335	0.319	0.414	-0.095	0.922959	3_Prolif
Ptn	4.11437e-05	-0.220634	0.548	0.325	0.223	0.92635	3_Prolif
Svbp	4.12115e-05	-0.25311	0.755	0.718	0.037	0.927877	3_Prolif
Klf13	4.15172e-05	-0.279621	0.388	0.46	-0.072	0.934759	3_Prolif
Ykt6	4.29355e-05	-0.216188	0.452	0.517	-0.065	0.966692	3_Prolif
Map4k3	4.31797e-05	-0.318837	0.298	0.379	-0.081	0.97219	3_Prolif
Ets1	4.54331e-05	-0.350705	0.489	0.521	-0.032	1	3_Prolif
Gpr180	4.54852e-05	-0.243656	0.66	0.637	0.023	1	3_Prolif
Ap2s1	4.59312e-05	-0.377947	0.681	0.643	0.038	1	3_Prolif
Rex1bd	4.73331e-05	-0.253982	0.92	0.842	0.078	1	3_Prolif
Arrdc4	4.79096e-05	-0.333561	0.191	0.294	-0.103	1	3_Prolif
Mpzl1	4.85441e-05	-0.326435	0.723	0.681	0.042	1	3_Prolif
Cd44	4.95558e-05	-0.417128	0.324	0.392	-0.068	1	3_Prolif
Ltbr	5.11485e-05	-0.244129	0.394	0.466	-0.072	1	3_Prolif
Lpl	5.33329e-05	-0.934993	0.729	0.475	0.254	1	3_Prolif
Fkbp14	5.84016e-05	-0.22251	0.766	0.727	0.039	1	3_Prolif
Aamp	6.15446e-05	-0.256883	0.787	0.754	0.033	1	3_Prolif
Cryab	6.40392e-05	-0.288381	0.112	0.218	-0.106	1	3_Prolif
Col11a2	6.44778e-05	0.322714	1	0.903	0.097	1	3_Prolif
Tpm2	6.51078e-05	-0.895979	0.271	0.35	-0.079	1	3_Prolif
Atraid	6.71288e-05	-0.212133	0.926	0.874	0.052	1	3_Prolif
Ebf1	6.83634e-05	-0.849443	0.729	0.681	0.048	1	3_Prolif
St6galnac4	6.91271e-05	-0.312438	0.255	0.346	-0.091	1	3_Prolif
Vdr	7.04916e-05	-0.358052	0.495	0.526	-0.031	1	3_Prolif
Iffo2	7.64946e-05	-0.228092	0.245	0.34	-0.095	1	3_Prolif
2310039H08Rik	7.67595e-05	-0.243746	0.766	0.701	0.065	1	3_Prolif
Mylip	7.93682e-05	-0.227301	0.197	0.304	-0.107	1	3_Prolif
Lamtor4	7.98779e-05	-0.228245	0.878	0.794	0.084	1	3_Prolif
Smox	8.21636e-05	-0.219332	0.191	0.293	-0.102	1	3_Prolif
Pla2g4a	8.51234e-05	-0.243867	0.133	0.238	-0.105	1	3_Prolif
Nfkbia	8.88219e-05	-0.375056	0.782	0.797	-0.015	1	3_Prolif
Aplp2	8.88467e-05	-0.319734	0.941	0.911	0.03	1	3_Prolif
Cdr2l	9.40128e-05	-0.293513	0.255	0.347	-0.092	1	3_Prolif
Sat1	0.00010133	-0.314378	0.596	0.617	-0.021	1	3_Prolif
Med13l	0.000104205	-0.304243	0.718	0.677	0.041	1	3_Prolif
Tmem119	0.000104801	-0.478005	0.16	0.261	-0.101	1	3_Prolif
Pard3	0.000107983	-0.265207	0.346	0.415	-0.069	1	3_Prolif
Psmb3	0.000109179	-0.2526	0.968	0.91	0.058	1	3_Prolif
Pdgfra	0.000112053	-0.310465	0.154	0.253	-0.099	1	3_Prolif
Zfp651	0.000113636	-0.227328	0.207	0.31	-0.103	1	3_Prolif
Supt4a	0.000113708	-0.261525	0.702	0.677	0.025	1	3_Prolif
Slc20a2	0.000115356	-0.589127	0.287	0.359	-0.072	1	3_Prolif
Mcfd2	0.000116346	-0.254831	0.686	0.641	0.045	1	3_Prolif
4931406P16Rik	0.000117119	-0.265941	0.298	0.387	-0.089	1	3_Prolif
Rtn4	0.000121691	-0.303858	0.957	0.914	0.043	1	3_Prolif
Retreg1	0.000121906	-0.263346	0.229	0.332	-0.103	1	3_Prolif
Ndufa4	0.000129742	-0.310879	0.989	0.947	0.042	1	3_Prolif
Yap1	0.000130833	-0.221533	0.335	0.413	-0.078	1	3_Prolif
Yipf3	0.000131087	-0.208323	0.755	0.715	0.04	1	3_Prolif
Myl12a	0.000134783	-0.360542	0.989	0.954	0.035	1	3_Prolif
Tjp1	0.000134816	-0.2514	0.356	0.42	-0.064	1	3_Prolif
Eprs	0.000138056	-0.227152	0.952	0.895	0.057	1	3_Prolif
Ifrd1	0.00013994	-0.297433	0.931	0.9	0.031	1	3_Prolif
Slc44a1	0.000145893	-0.324122	0.495	0.505	-0.01	1	3_Prolif
Penk	0.000148722	-0.290704	0.372	0.218	0.154	1	3_Prolif
Tmem57	0.000148839	-0.246574	0.596	0.593	0.003	1	3_Prolif
Hnrnph1	0.000157405	-0.284762	0.963	0.935	0.028	1	3_Prolif
Arid4b	0.000160677	-0.327692	0.75	0.696	0.054	1	3_Prolif
Nudt4	0.000162705	-0.76352	0.67	0.628	0.042	1	3_Prolif
Bambi	0.000164069	-0.447714	0.426	0.474	-0.048	1	3_Prolif
Ltbp3	0.000170572	-0.364909	0.58	0.576	0.004	1	3_Prolif
Lrrc58	0.000175259	-0.256634	0.777	0.742	0.035	1	3_Prolif
Nfe2l2	0.000182219	-0.269118	0.346	0.409	-0.063	1	3_Prolif
Gpc4	0.000203005	-0.249036	0.34	0.403	-0.063	1	3_Prolif
Maged2	0.000203331	-0.233567	0.979	0.927	0.052	1	3_Prolif
Abl2	0.000207234	-0.26787	0.293	0.368	-0.075	1	3_Prolif
Dynll1	0.000213357	0.396594	0.995	0.979	0.016	1	3_Prolif
Klf4	0.000215081	-0.384799	0.931	0.926	0.005	1	3_Prolif
Uqcrc1	0.000220352	-0.261215	0.766	0.711	0.055	1	3_Prolif
Rhob	0.000222226	0.416735	0.862	0.744	0.118	1	3_Prolif
Arpc1a	0.000227453	-0.245022	0.729	0.675	0.054	1	3_Prolif
Ghr	0.000241584	-0.24186	0.303	0.382	-0.079	1	3_Prolif
Zbtb7a	0.000244504	-0.307668	0.356	0.425	-0.069	1	3_Prolif
Vps28	0.000245174	-0.201395	0.686	0.658	0.028	1	3_Prolif
Sppl2a	0.000250178	-0.23346	0.713	0.673	0.04	1	3_Prolif
Svil	0.000262228	-0.260334	0.144	0.233	-0.089	1	3_Prolif
Acvr1	0.000264193	-0.243591	0.335	0.409	-0.074	1	3_Prolif
Ier3	0.000266946	-0.643594	0.856	0.81	0.046	1	3_Prolif
Epha2	0.000268349	-0.304817	0.479	0.512	-0.033	1	3_Prolif
Arhgap23	0.000287522	-0.228673	0.463	0.503	-0.04	1	3_Prolif
Cox6a1	0.000298103	-0.223659	0.963	0.93	0.033	1	3_Prolif
Gng11	0.000299365	-0.490181	0.713	0.653	0.06	1	3_Prolif
Myl9	0.000311136	-0.85004	0.197	0.278	-0.081	1	3_Prolif
Bglap	0.000317732	-3.6377	0.245	0.319	-0.074	1	3_Prolif
Ppp3ca	0.000333254	-0.203739	0.952	0.892	0.06	1	3_Prolif
Ptp4a3	0.000342449	-0.223051	0.25	0.335	-0.085	1	3_Prolif
Cd276	0.000344231	-0.299582	0.436	0.457	-0.021	1	3_Prolif
Sertad1	0.000350586	-0.285672	0.782	0.778	0.004	1	3_Prolif
Dnm3os	0.000361175	-0.24534	0.165	0.258	-0.093	1	3_Prolif
Mprip	0.000376315	-0.305942	0.824	0.77	0.054	1	3_Prolif
Ppm1a	0.00039183	-0.250721	0.676	0.676	0	1	3_Prolif
Cltc	0.000393712	-0.222367	0.91	0.824	0.086	1	3_Prolif
Tle2	0.000397319	-0.317226	0.154	0.238	-0.084	1	3_Prolif
Cfl1	0.000404796	-0.415663	0.984	0.962	0.022	1	3_Prolif
Fkbp7	0.000415386	-0.582774	0.707	0.648	0.059	1	3_Prolif
Csad	0.000425981	-0.231667	0.293	0.375	-0.082	1	3_Prolif
Rb1cc1	0.0004397	-0.277978	0.58	0.581	-0.001	1	3_Prolif
Rrbp1	0.00043979	-0.230581	1	0.991	0.009	1	3_Prolif
Col11a1	0.000463738	0.290063	1	0.978	0.022	1	3_Prolif
Capns1	0.000485933	-0.234707	0.952	0.87	0.082	1	3_Prolif
Prkar1a	0.000504594	-0.273751	0.926	0.859	0.067	1	3_Prolif
Fat3	0.000525685	-0.300057	0.207	0.291	-0.084	1	3_Prolif
Cacnb3	0.000530728	-0.20231	0.149	0.238	-0.089	1	3_Prolif
Myd88	0.000541083	-0.238125	0.165	0.25	-0.085	1	3_Prolif
Hbb-bs	0.000542076	-1.54906	0.973	0.969	0.004	1	3_Prolif
D16Ertd472e	0.000546973	-0.256314	0.33	0.394	-0.064	1	3_Prolif
Col4a2	0.000552207	-0.579411	0.186	0.27	-0.084	1	3_Prolif
Rin2	0.000576093	-0.301297	0.362	0.412	-0.05	1	3_Prolif
Itgav	0.000589408	-0.398728	0.574	0.556	0.018	1	3_Prolif
Son	0.000599384	-0.212648	0.989	0.952	0.037	1	3_Prolif
Ndel1	0.000606722	-0.200173	0.878	0.781	0.097	1	3_Prolif
Ndfip2	0.000675059	-0.242791	0.479	0.504	-0.025	1	3_Prolif
Use1	0.000682777	-0.202352	0.819	0.748	0.071	1	3_Prolif
mt-Nd4l	0.000682922	-0.32747	0.979	0.936	0.043	1	3_Prolif
Slc39a13	0.000693929	-0.219563	0.452	0.487	-0.035	1	3_Prolif
Mdk	0.00070564	-0.96998	0.441	0.462	-0.021	1	3_Prolif
Tmod3	0.000730554	-0.436949	0.516	0.514	0.002	1	3_Prolif
Cstb	0.000734186	-0.299098	0.84	0.761	0.079	1	3_Prolif
Atp11a	0.000747118	-0.227671	0.181	0.264	-0.083	1	3_Prolif
Ptov1	0.000821913	-0.200654	0.979	0.938	0.041	1	3_Prolif
Med10	0.000840384	-0.271449	0.707	0.642	0.065	1	3_Prolif
Sparc	0.000918911	-0.941888	1	1	0	1	3_Prolif
Mark3	0.000940435	-0.223701	0.66	0.636	0.024	1	3_Prolif
Tnni2	0.000956721	-0.358319	0.271	0.161	0.11	1	3_Prolif
Cers2	0.000958742	-0.206588	0.707	0.666	0.041	1	3_Prolif
Cast	0.000958772	-0.290611	0.543	0.544	-0.001	1	3_Prolif
Lrp10	0.000993594	-0.24026	0.441	0.46	-0.019	1	3_Prolif
Irf2bpl	0.00100272	-0.254036	0.33	0.392	-0.062	1	3_Prolif
Ell2	0.00105045	-0.23201	0.479	0.504	-0.025	1	3_Prolif
Sri	0.00105113	-0.234456	0.707	0.663	0.044	1	3_Prolif
Usp9x	0.00105948	-0.219461	0.809	0.714	0.095	1	3_Prolif
Vmp1	0.00113827	-0.246825	0.691	0.652	0.039	1	3_Prolif
Eva1b	0.00115011	-0.261883	0.761	0.739	0.022	1	3_Prolif
Sh3bgrl	0.00115564	-0.383063	0.739	0.683	0.056	1	3_Prolif
Ctsf	0.0011974	-0.216016	0.351	0.403	-0.052	1	3_Prolif
Ech1	0.00120025	-0.219444	0.67	0.638	0.032	1	3_Prolif
Tmem123	0.00122196	-0.254238	0.229	0.303	-0.074	1	3_Prolif
Samhd1	0.00123269	-0.342215	0.5	0.512	-0.012	1	3_Prolif
Igf2bp2	0.00124102	-0.23158	0.383	0.431	-0.048	1	3_Prolif
Csrnp1	0.00126582	-0.266685	0.479	0.512	-0.033	1	3_Prolif
Glmp	0.00126993	-0.222921	0.277	0.34	-0.063	1	3_Prolif
Gmds	0.00127228	-0.219237	0.537	0.541	-0.004	1	3_Prolif
Aurkaip1	0.00127882	-0.214264	0.872	0.756	0.116	1	3_Prolif
1110008F13Rik	0.00128194	-0.214739	0.856	0.778	0.078	1	3_Prolif
Dlg5	0.0012996	-0.240357	0.16	0.238	-0.078	1	3_Prolif
Irf1	0.00130696	-0.321977	0.266	0.336	-0.07	1	3_Prolif
Sptan1	0.00141216	-0.269691	0.511	0.535	-0.024	1	3_Prolif
Sbf2	0.00145582	-0.237203	0.335	0.383	-0.048	1	3_Prolif
Hipk1	0.00158056	-0.269787	0.718	0.649	0.069	1	3_Prolif
Eaf1	0.00163998	-0.202151	0.287	0.353	-0.066	1	3_Prolif
Glrx5	0.00166687	-0.211049	0.707	0.689	0.018	1	3_Prolif
Fermt2	0.00168324	-0.282072	0.809	0.752	0.057	1	3_Prolif
Camk2n1	0.00171157	-0.20536	0.154	0.234	-0.08	1	3_Prolif
Bax	0.00188901	-0.214223	0.814	0.762	0.052	1	3_Prolif
Ypel5	0.00189223	-0.20083	0.282	0.335	-0.053	1	3_Prolif
Pttg1ip	0.00189672	-0.200646	0.681	0.637	0.044	1	3_Prolif
Ptpn1	0.00192072	-0.290459	0.58	0.606	-0.026	1	3_Prolif
Hexa	0.00193308	-0.231514	0.803	0.754	0.049	1	3_Prolif
Atf3	0.00194135	-0.427773	0.734	0.73	0.004	1	3_Prolif
Tmbim4	0.00203167	-0.200578	0.819	0.75	0.069	1	3_Prolif
Nxf1	0.00204387	-0.237217	0.83	0.772	0.058	1	3_Prolif
Tgm2	0.00214899	-0.274087	0.234	0.297	-0.063	1	3_Prolif
Pkd2	0.00237161	-0.279251	0.495	0.5	-0.005	1	3_Prolif
Vldlr	0.00239681	-0.269315	0.415	0.45	-0.035	1	3_Prolif
Tax1bp1	0.00241701	-0.206239	0.91	0.863	0.047	1	3_Prolif
Smpdl3a	0.0024234	-0.2103	0.378	0.418	-0.04	1	3_Prolif
AI314180	0.00252987	-0.223261	0.521	0.518	0.003	1	3_Prolif
Mycbp2	0.00257035	-0.253527	0.697	0.661	0.036	1	3_Prolif
Cap1	0.00266802	-0.227299	0.383	0.434	-0.051	1	3_Prolif
Ndufa3	0.00268952	-0.213218	0.761	0.708	0.053	1	3_Prolif
Psme1	0.00273701	-0.256153	0.383	0.421	-0.038	1	3_Prolif
Pgrmc1	0.00288303	-0.353852	0.84	0.742	0.098	1	3_Prolif
Pgd	0.00289651	-0.217617	0.66	0.607	0.053	1	3_Prolif
Col4a1	0.00289988	-0.913939	0.176	0.244	-0.068	1	3_Prolif
Tagln2	0.00301596	-0.641188	0.596	0.576	0.02	1	3_Prolif
Hilpda	0.00306228	-0.3218	0.234	0.301	-0.067	1	3_Prolif
Rcn3	0.00307178	-0.230179	0.995	0.987	0.008	1	3_Prolif
Pdcd4	0.00318436	-0.209177	0.824	0.767	0.057	1	3_Prolif
Adgra3	0.00331505	-0.230272	0.601	0.568	0.033	1	3_Prolif
Adam9	0.003326	-0.206756	0.202	0.266	-0.064	1	3_Prolif
Trio	0.00335781	-0.210531	0.362	0.405	-0.043	1	3_Prolif
Mcrip1	0.00348723	-0.219515	0.894	0.846	0.048	1	3_Prolif
Usp34	0.003492	-0.205696	0.798	0.749	0.049	1	3_Prolif
Pqlc1	0.00357691	-0.251173	0.372	0.415	-0.043	1	3_Prolif
Meg3	0.00358523	-0.611819	0.91	0.681	0.229	1	3_Prolif
Etfb	0.00367115	-0.215147	0.851	0.792	0.059	1	3_Prolif
Pltp	0.00380769	-0.28703	0.277	0.321	-0.044	1	3_Prolif
Tln1	0.00404853	-0.259931	0.766	0.682	0.084	1	3_Prolif
Bace1	0.00410743	-0.2045	0.309	0.351	-0.042	1	3_Prolif
Elf1	0.00418224	-0.261379	0.367	0.405	-0.038	1	3_Prolif
Nedd9	0.00419539	-0.266718	0.596	0.582	0.014	1	3_Prolif
Cd2ap	0.00441866	-0.212302	0.681	0.603	0.078	1	3_Prolif
Map2k3	0.00446947	-0.285592	0.718	0.678	0.04	1	3_Prolif
Plxdc2	0.00454448	-0.550981	0.356	0.371	-0.015	1	3_Prolif
Sdcbp	0.00459708	-0.218714	0.883	0.798	0.085	1	3_Prolif
Eif5	0.0046754	-0.200712	0.984	0.963	0.021	1	3_Prolif
Zfp36	0.00472002	-0.366407	0.691	0.731	-0.04	1	3_Prolif
Ttc28	0.00473053	-0.276049	0.543	0.536	0.007	1	3_Prolif
Helz	0.00511154	-0.202388	0.473	0.475	-0.002	1	3_Prolif
Stk17b	0.00514094	-0.362369	0.41	0.425	-0.015	1	3_Prolif
Emp3	0.00515832	-0.245434	0.957	0.909	0.048	1	3_Prolif
Rnf149	0.00516552	-0.249627	0.766	0.675	0.091	1	3_Prolif
Tead2	0.00521269	-0.255544	0.186	0.246	-0.06	1	3_Prolif
2011-09-01	0.00531444	-0.421182	0.729	0.706	0.023	1	3_Prolif
Lmo7	0.00557611	-0.253751	0.394	0.427	-0.033	1	3_Prolif
Rora	0.0056591	-0.235761	0.415	0.433	-0.018	1	3_Prolif
Znrf1	0.00582499	-0.202448	0.223	0.279	-0.056	1	3_Prolif
Crebrf	0.00603404	-0.200861	0.404	0.44	-0.036	1	3_Prolif
Ssbp4	0.00611088	-0.285531	0.356	0.375	-0.019	1	3_Prolif
Arih1	0.00616023	-0.226401	0.697	0.661	0.036	1	3_Prolif
Iah1	0.00635371	-0.212911	0.34	0.37	-0.03	1	3_Prolif
Hba-a2	0.00635979	-1.12935	0.633	0.596	0.037	1	3_Prolif
Top2b	0.00648682	-0.230345	0.771	0.703	0.068	1	3_Prolif
Sp7	0.00678429	-0.239331	0.426	0.442	-0.016	1	3_Prolif
Lgals3	0.00687331	-0.257137	0.899	0.634	0.265	1	3_Prolif
Grn	0.0072611	-0.241447	0.702	0.64	0.062	1	3_Prolif
Cavin1	0.00727498	-0.228684	0.798	0.718	0.08	1	3_Prolif
Rps6kb1	0.00742313	-0.222509	0.723	0.656	0.067	1	3_Prolif
Dennd5b	0.00764524	-0.221214	0.16	0.218	-0.058	1	3_Prolif
Ywhaz	0.00811409	-0.205322	0.968	0.896	0.072	1	3_Prolif
Rnd3	0.00832553	-0.255076	0.473	0.484	-0.011	1	3_Prolif
Ifitm2	0.00833957	-0.248695	0.989	0.96	0.029	1	3_Prolif
Zfhx3	0.00852969	-0.26578	0.67	0.651	0.019	1	3_Prolif
Ints2	0.00874534	-0.241623	0.356	0.378	-0.022	1	3_Prolif
Peli1	0.00879539	-0.257831	0.574	0.576	-0.002	1	3_Prolif
Hip1	0.00917905	-0.228981	0.309	0.351	-0.042	1	3_Prolif
Sbno2	0.00951309	-0.267907	0.537	0.519	0.018	1	3_Prolif
Gadd45a	0.00951311	-0.257269	0.436	0.455	-0.019	1	3_Prolif
Slc5a3	0.00973764	-0.260527	0.436	0.473	-0.037	1	3_Prolif
Nrip1	0.0098788	-0.280369	0.457	0.459	-0.002	1	3_Prolif

## Sheet: pre-hypertrophic chondrocytes
gene	p_val	avg_log2FC	% in this cluster	% in all other cells	% difference	p_val_adj	cluster
Panx3	0	1.83208	0.984	0.403	0.581	0	4_preHC
P3h2	0	1.33281	0.969	0.223	0.746	0	4_preHC
Hapln1	2.23647e-304	2.02426	1	0.776	0.224	5.03542e-300	4_preHC
Scin	5.24577e-289	1.20681	0.955	0.301	0.654	1.18109e-284	4_preHC
Serinc5	1.0638e-277	1.617	0.958	0.361	0.597	2.39516e-273	4_preHC
Ppa1	8.87389e-263	2.43419	0.99	0.749	0.241	1.99796e-258	4_preHC
Smpd3	1.8099e-259	2.05798	0.993	0.564	0.429	4.07499e-255	4_preHC
Scd2	4.1544e-259	1.51507	1	0.803	0.197	9.35363e-255	4_preHC
Slc16a3	1.05795e-252	1.25493	0.983	0.382	0.601	2.38197e-248	4_preHC
Scd1	3.9725e-252	1.21872	0.98	0.455	0.525	8.94409e-248	4_preHC
Comp	5.50801e-252	1.89154	1	0.798	0.202	1.24013e-247	4_preHC
Ldha	2.25243e-249	1.25817	0.999	0.973	0.026	5.07135e-245	4_preHC
Il17b	4.14217e-249	1.73866	0.958	0.311	0.647	9.3261e-245	4_preHC
Bnip3	2.31597e-244	1.56292	0.986	0.513	0.473	5.2144e-240	4_preHC
P4ha2	4.25649e-237	1.28698	0.997	0.717	0.28	9.5835e-233	4_preHC
Higd1a	1.5341e-232	1.57476	0.999	0.894	0.105	3.45402e-228	4_preHC
Fgfr3	1.47009e-228	1.26387	0.999	0.652	0.347	3.30992e-224	4_preHC
Lgals3	1.85395e-224	1.60283	0.994	0.549	0.445	4.17418e-220	4_preHC
3110079O15Rik	6.04864e-217	1.38139	1	0.79	0.21	1.36185e-212	4_preHC
Smim5	1.12194e-216	0.816234	0.728	0.151	0.577	2.52604e-212	4_preHC
Prkg2	6.95598e-216	1.06355	0.928	0.342	0.586	1.56614e-211	4_preHC
Bsg	5.51582e-215	1.31079	1	0.985	0.015	1.24189e-210	4_preHC
Hspg2	2.63553e-213	1.05714	1	0.946	0.054	5.93389e-209	4_preHC
Ccdc88c	2.16809e-205	0.705306	0.711	0.143	0.568	4.88146e-201	4_preHC
Cd24a	8.39254e-204	1.2029	0.997	0.63	0.367	1.88958e-199	4_preHC
Pgk1	4.41799e-201	1.34419	0.999	0.85	0.149	9.94711e-197	4_preHC
Pkm	3.61962e-199	1.13131	1	0.95	0.05	8.14958e-195	4_preHC
Adk	2.46201e-194	1.06057	0.982	0.704	0.278	5.54322e-190	4_preHC
Cdkn1c	3.10467e-194	2.13143	0.997	0.802	0.195	6.99016e-190	4_preHC
Aldoa	6.00827e-194	1.08604	0.996	0.891	0.105	1.35276e-189	4_preHC
Gapdh	2.34699e-191	1.18069	0.999	0.993	0.006	5.28425e-187	4_preHC
Me1	5.03377e-190	0.941037	0.979	0.511	0.468	1.13335e-185	4_preHC
Aldoc	3.00447e-189	0.889249	0.914	0.324	0.59	6.76457e-185	4_preHC
Ihh	5.79652e-189	0.845145	0.529	0.063	0.466	1.30509e-184	4_preHC
Car12	1.43814e-187	0.841784	0.827	0.239	0.588	3.23798e-183	4_preHC
Fam89a	3.04856e-187	0.799149	0.918	0.328	0.59	6.86383e-183	4_preHC
Ifitm2	1.53111e-183	-1.13005	0.932	0.97	-0.038	3.4473e-179	4_preHC
Pgam1	2.0299e-180	1.05339	0.996	0.875	0.121	4.57031e-176	4_preHC
Col11a1	2.31342e-180	1.09223	1	0.974	0.026	5.20867e-176	4_preHC
Slc8a3	9.42651e-180	1.00992	0.911	0.414	0.497	2.12238e-175	4_preHC
Gale	4.82828e-179	0.908672	0.959	0.466	0.493	1.08709e-174	4_preHC
Tpi1	3.045e-178	1.06763	0.997	0.875	0.122	6.85583e-174	4_preHC
Ak4	4.53866e-178	0.551562	0.774	0.209	0.565	1.02188e-173	4_preHC
Slc44a2	2.92327e-177	0.82003	0.98	0.548	0.432	6.58175e-173	4_preHC
Nim1k	7.25391e-177	0.462715	0.591	0.097	0.494	1.63322e-172	4_preHC
Wscd2	3.23531e-176	0.556196	0.849	0.252	0.597	7.2843e-172	4_preHC
Lims2	4.39698e-176	0.456378	0.708	0.156	0.552	9.89979e-172	4_preHC
Prdx2	1.86495e-175	-1.27649	0.818	0.94	-0.122	4.19894e-171	4_preHC
H2-Ab1	6.26333e-172	1.15072	0.863	0.315	0.548	1.41019e-167	4_preHC
Fam162a	1.99876e-171	1.1941	0.99	0.784	0.206	4.5002e-167	4_preHC
Mif	1.47905e-167	1.11568	0.997	0.944	0.053	3.33008e-163	4_preHC
Pth1r	1.5691e-166	1.56796	0.992	0.81	0.182	3.53283e-162	4_preHC
Chrdl1	1.86578e-165	0.401821	0.453	0.046	0.407	4.2008e-161	4_preHC
Rras2	3.06872e-164	0.702074	0.872	0.344	0.528	6.90921e-160	4_preHC
Papss2	4.544e-164	0.992182	0.994	0.655	0.339	1.02308e-159	4_preHC
Hip1r	5.91906e-163	0.675862	0.937	0.394	0.543	1.33268e-158	4_preHC
Pygl	8.81054e-163	0.727358	0.966	0.43	0.536	1.98369e-158	4_preHC
1810058I24Rik	6.07321e-157	0.810663	0.99	0.896	0.094	1.36738e-152	4_preHC
Nid2	1.12121e-155	0.868212	0.989	0.574	0.415	2.52441e-151	4_preHC
Slc2a1	5.40177e-155	0.75218	0.918	0.404	0.514	1.21621e-150	4_preHC
Slc38a3	1.24183e-154	0.52969	0.849	0.282	0.567	2.79599e-150	4_preHC
Stk39	3.7528e-154	0.720986	0.889	0.406	0.483	8.44944e-150	4_preHC
Eps8l2	7.1091e-152	0.478284	0.595	0.12	0.475	1.60061e-147	4_preHC
Xylt1	1.06798e-151	0.888377	0.996	0.561	0.435	2.40456e-147	4_preHC
Pak3	1.53969e-150	0.506851	0.793	0.246	0.547	3.46661e-146	4_preHC
Wnt5b	8.66687e-150	0.588506	0.913	0.382	0.531	1.95135e-145	4_preHC
Ost4	2.49657e-149	0.720115	0.983	0.937	0.046	5.62103e-145	4_preHC
Ndufa4l2	4.74919e-149	1.26305	0.965	0.538	0.427	1.06928e-144	4_preHC
Wnt4	1.41683e-145	1.10637	0.934	0.546	0.388	3.19e-141	4_preHC
Fgfr1	3.96338e-145	-1.18828	0.52	0.827	-0.307	8.92354e-141	4_preHC
Bgn	5.23756e-144	-1.2693	0.951	0.991	-0.04	1.17924e-139	4_preHC
Col1a2	7.10629e-144	-4.32278	0.99	0.997	-0.007	1.59998e-139	4_preHC
Nog	1.67555e-143	0.558161	0.795	0.25	0.545	3.7725e-139	4_preHC
Scube1	2.51004e-143	0.472087	0.646	0.164	0.482	5.65136e-139	4_preHC
Deptor	4.83708e-143	0.426834	0.694	0.18	0.514	1.08907e-138	4_preHC
Col2a1	2.76381e-142	1.10762	1	0.995	0.005	6.22272e-138	4_preHC
Timp2	1.08083e-141	-1.13394	0.795	0.923	-0.128	2.43348e-137	4_preHC
Loxl2	1.38799e-141	0.833953	0.994	0.758	0.236	3.12507e-137	4_preHC
Flvcr2	9.99146e-141	0.348833	0.632	0.148	0.484	2.24958e-136	4_preHC
Ndrg2	1.27515e-140	0.461698	0.729	0.212	0.517	2.87099e-136	4_preHC
Foxo4	2.04365e-140	0.530856	0.8	0.273	0.527	4.60127e-136	4_preHC
Atp6v0a4	5.96786e-140	0.302658	0.391	0.04	0.351	1.34366e-135	4_preHC
Lbh	1.56065e-139	0.766267	0.951	0.557	0.394	3.51379e-135	4_preHC
Slc26a2	1.13201e-138	0.83932	0.99	0.634	0.356	2.54871e-134	4_preHC
H3f3a	1.56143e-136	-0.632675	0.989	0.997	-0.008	3.51557e-132	4_preHC
Serpine2	1.64432e-136	-3.53305	0.181	0.663	-0.482	3.70219e-132	4_preHC
Ptma	8.58162e-136	-0.863452	0.996	1	-0.004	1.93215e-131	4_preHC
Ncmap	1.32808e-135	0.76948	0.966	0.456	0.51	2.99017e-131	4_preHC
Fdps	2.43174e-135	0.909624	0.983	0.639	0.344	5.47505e-131	4_preHC
Tmem59	3.16415e-133	-1.05036	0.976	0.981	-0.005	7.12408e-129	4_preHC
Ugp2	2.32561e-132	0.908967	0.966	0.673	0.293	5.23612e-128	4_preHC
Acan	8.82935e-132	1.06685	1	0.806	0.194	1.98793e-127	4_preHC
Ckap4	9.29986e-132	0.745802	1	0.931	0.069	2.09386e-127	4_preHC
Col1a1	1.01381e-131	-5.33481	0.929	0.948	-0.019	2.2826e-127	4_preHC
Col27a1	2.10219e-131	1.01866	0.999	0.774	0.225	4.73309e-127	4_preHC
Pid1	2.43754e-130	0.495241	0.764	0.256	0.508	5.48812e-126	4_preHC
Rbm17	6.29577e-130	0.665568	0.982	0.67	0.312	1.41749e-125	4_preHC
Lxn	8.6349e-130	0.673387	0.877	0.426	0.451	1.94415e-125	4_preHC
Gng5	9.54007e-130	0.657499	0.994	0.969	0.025	2.14795e-125	4_preHC
Tpm1	1.15055e-129	-1.68967	0.877	0.95	-0.073	2.59047e-125	4_preHC
Tmie	1.17045e-129	0.311033	0.498	0.092	0.406	2.63527e-125	4_preHC
Gja1	1.8108e-128	-1.95661	0.409	0.759	-0.35	4.07701e-124	4_preHC
Anxa11	6.86699e-128	0.623269	0.952	0.475	0.477	1.5461e-123	4_preHC
Rrbp1	3.1385e-127	0.64249	1	0.99	0.01	7.06633e-123	4_preHC
Tmem45a	3.80365e-127	0.672547	0.965	0.586	0.379	8.56392e-123	4_preHC
Mmp2	9.00507e-127	-1.0665	0.822	0.908	-0.086	2.02749e-122	4_preHC
Ubb	1.46212e-126	-0.809125	0.999	0.998	0.001	3.29197e-122	4_preHC
Cox4i2	2.16125e-126	1.16168	0.896	0.551	0.345	4.86605e-122	4_preHC
Stc2	1.17438e-125	0.442422	0.709	0.218	0.491	2.64412e-121	4_preHC
H2-DMa	1.73872e-124	0.698082	0.904	0.351	0.553	3.91472e-120	4_preHC
Tubb2a	2.19628e-124	1.00049	0.979	0.727	0.252	4.94493e-120	4_preHC
Sgms2	4.19782e-124	1.79234	0.931	0.636	0.295	9.4514e-120	4_preHC
Ehd3	7.21665e-124	0.350138	0.573	0.132	0.441	1.62483e-119	4_preHC
Fam180a	3.35559e-123	0.705097	0.961	0.456	0.505	7.55511e-119	4_preHC
B2m	5.3289e-123	-1.46932	0.419	0.745	-0.326	1.1998e-118	4_preHC
Lcp1	1.99447e-122	0.393503	0.664	0.19	0.474	4.49056e-118	4_preHC
H2-DMb1	2.49731e-122	0.655282	0.918	0.382	0.536	5.6227e-118	4_preHC
Thbs1	5.59476e-122	0.878424	1	0.813	0.187	1.25966e-117	4_preHC
Tmem97	9.40116e-122	0.672784	0.953	0.587	0.366	2.11667e-117	4_preHC
Ywhaq	1.65608e-121	0.724967	0.992	0.91	0.082	3.72867e-117	4_preHC
Supt3	8.35898e-121	0.476799	0.721	0.248	0.473	1.88202e-116	4_preHC
Stk26	1.65759e-120	0.550113	0.908	0.402	0.506	3.73205e-116	4_preHC
Ntan1	2.48713e-120	0.704062	0.952	0.691	0.261	5.59978e-116	4_preHC
Gramd2	5.6411e-120	0.500688	0.883	0.366	0.517	1.27009e-115	4_preHC
Car8	9.44596e-119	0.53588	0.539	0.131	0.408	2.12676e-114	4_preHC
Gdf10	4.47782e-118	0.77276	0.927	0.409	0.518	1.00818e-113	4_preHC
Klhl13	2.01348e-117	0.514962	0.808	0.334	0.474	4.53334e-113	4_preHC
Ptprs	2.78086e-117	-1.14966	0.489	0.767	-0.278	6.26111e-113	4_preHC
Dap	3.04918e-117	0.659617	0.989	0.911	0.078	6.86522e-113	4_preHC
Cobll1	5.71924e-117	0.441968	0.815	0.307	0.508	1.28769e-112	4_preHC
P4ha1	1.87809e-116	0.690951	0.992	0.791	0.201	4.22851e-112	4_preHC
H2-Q10	3.04204e-116	0.346599	0.478	0.092	0.386	6.84916e-112	4_preHC
Slc35d1	1.21626e-115	0.627181	0.956	0.527	0.429	2.7384e-111	4_preHC
Dad1	1.03189e-114	0.575772	0.999	0.97	0.029	2.32331e-110	4_preHC
Shisa4	1.45863e-114	0.668119	0.959	0.641	0.318	3.2841e-110	4_preHC
mt-Co3	1.82724e-114	-0.89075	1	1	0	4.11404e-110	4_preHC
Egln1	3.73245e-114	0.849361	0.959	0.617	0.342	8.40361e-110	4_preHC
Ppp1r1b	4.4513e-114	0.324095	0.543	0.129	0.414	1.00221e-109	4_preHC
Col11a2	5.78856e-114	0.866781	1	0.882	0.118	1.3033e-109	4_preHC
Kdelr3	5.80698e-114	0.621665	0.993	0.855	0.138	1.30744e-109	4_preHC
Foxa3	1.54694e-113	0.459516	0.743	0.254	0.489	3.48295e-109	4_preHC
Itm2c	8.94009e-113	-0.800059	0.743	0.876	-0.133	2.01286e-108	4_preHC
Mef2c	8.96919e-113	0.959089	0.965	0.666	0.299	2.01941e-108	4_preHC
Sema3d	3.63951e-112	0.590277	0.8	0.349	0.451	8.19436e-108	4_preHC
Tmsb4x	5.82735e-112	-3.22279	0.629	0.802	-0.173	1.31203e-107	4_preHC
Matn3	3.54849e-111	1.04824	1	0.696	0.304	7.98942e-107	4_preHC
2610528A11Rik	3.73185e-111	0.85598	0.535	0.144	0.391	8.40225e-107	4_preHC
Mgarp	5.43072e-111	0.433224	0.76	0.271	0.489	1.22273e-106	4_preHC
Syt8	1.56513e-110	0.447476	0.449	0.088	0.361	3.52388e-106	4_preHC
mt-Co1	4.7278e-110	-0.920472	1	1	0	1.06446e-105	4_preHC
Smoc2	1.90824e-109	0.753703	0.997	0.648	0.349	4.2964e-105	4_preHC
Mmp14	3.69281e-108	-1.66208	0.518	0.779	-0.261	8.31435e-104	4_preHC
Chst11	5.14649e-108	0.799579	0.994	0.671	0.323	1.15873e-103	4_preHC
Marcks	5.64436e-108	-2.1127	0.255	0.644	-0.389	1.27083e-103	4_preHC
mt-Atp6	3.21007e-107	-0.69239	1	1	0	7.22747e-103	4_preHC
Rexo2	4.60287e-107	0.623503	0.972	0.769	0.203	1.03634e-102	4_preHC
Ifitm3	2.19413e-106	-2.22949	0.106	0.551	-0.445	4.94009e-102	4_preHC
Capn6	2.90499e-105	0.685032	0.972	0.646	0.326	6.54058e-101	4_preHC
Fap	9.67282e-105	-1.38718	0.051	0.504	-0.453	2.17783e-100	4_preHC
Cdh11	1.37198e-104	-1.74152	0.059	0.509	-0.45	3.08901e-100	4_preHC
Scn1b	1.52516e-104	0.499295	0.869	0.401	0.468	3.43391e-100	4_preHC
Cald1	2.74973e-104	-1.34431	0.786	0.904	-0.118	6.19101e-100	4_preHC
Nhej1	3.31621e-104	0.264953	0.389	0.067	0.322	7.46645e-100	4_preHC
Pacsin2	8.29836e-104	0.48869	0.92	0.468	0.452	1.86838e-99	4_preHC
Frzb	9.7513e-104	0.45297	0.614	0.184	0.43	2.19551e-99	4_preHC
Scara3	2.10581e-103	-0.93462	0.049	0.501	-0.452	4.74122e-99	4_preHC
Ptprd	1.27172e-102	-1.39024	0.262	0.635	-0.373	2.86328e-98	4_preHC
Gm42418	1.78553e-102	-0.906186	1	1	0	4.02012e-98	4_preHC
Fstl1	3.6584e-102	-1.97656	0.458	0.754	-0.296	8.23689e-98	4_preHC
Necab3	3.72672e-102	0.232444	0.378	0.061	0.317	8.39071e-98	4_preHC
Rhoc	4.09071e-102	-0.852109	0.513	0.769	-0.256	9.21023e-98	4_preHC
Pgm2	4.10613e-102	0.476362	0.874	0.416	0.458	9.24496e-98	4_preHC
Spp1	1.05441e-101	-4.92251	0.581	0.772	-0.191	2.374e-97	4_preHC
Igf1r	3.88501e-101	0.653348	0.986	0.781	0.205	8.7471e-97	4_preHC
Eno1	6.43926e-101	0.759376	0.987	0.798	0.189	1.4498e-96	4_preHC
Zbtb20	1.52627e-100	0.743446	0.997	0.792	0.205	3.43639e-96	4_preHC
Lgals1	1.36831e-99	-2.59365	0.365	0.666	-0.301	3.08074e-95	4_preHC
H2afv	1.42603e-99	-0.940191	0.743	0.85	-0.107	3.2107e-95	4_preHC
Matn2	4.04411e-99	0.373468	0.791	0.307	0.484	9.10531e-95	4_preHC
Cfh	5.3089e-99	-2.49447	0.11	0.527	-0.417	1.1953e-94	4_preHC
Chst12	8.99576e-99	0.33898	0.636	0.207	0.429	2.0254e-94	4_preHC
Cdh2	9.50147e-99	-1.3676	0.056	0.491	-0.435	2.13926e-94	4_preHC
Ctsb	1.45546e-98	-0.836267	0.834	0.89	-0.056	3.27696e-94	4_preHC
Slc25a1	2.51408e-98	0.482028	0.867	0.436	0.431	5.66045e-94	4_preHC
Zfp36l1	3.15913e-98	-1.31332	0.449	0.746	-0.297	7.11278e-94	4_preHC
Fads2	3.81507e-98	0.255249	0.539	0.146	0.393	8.58963e-94	4_preHC
Ctsl	7.51488e-98	-1.12465	0.695	0.824	-0.129	1.69197e-93	4_preHC
Cab39	2.25114e-97	0.622507	0.897	0.543	0.354	5.06844e-93	4_preHC
Aes	5.97605e-97	-1.11434	0.078	0.502	-0.424	1.34551e-92	4_preHC
Rps6	2.11857e-96	0.441909	0.997	0.998	-0.001	4.76997e-92	4_preHC
Plcd1	2.63313e-96	0.494401	0.858	0.421	0.437	5.92849e-92	4_preHC
Tnc	5.23603e-96	-3.28984	0.134	0.542	-0.408	1.17889e-91	4_preHC
Selenos	8.16099e-95	0.516928	0.999	0.936	0.063	1.83745e-90	4_preHC
Runx3	8.73628e-95	0.545793	0.927	0.506	0.421	1.96697e-90	4_preHC
Anxa4	1.08753e-94	0.466642	0.821	0.397	0.424	2.44858e-90	4_preHC
Rpl38	2.20997e-94	0.407919	1	0.997	0.003	4.97574e-90	4_preHC
Serp1	4.23482e-94	0.538026	0.984	0.882	0.102	9.5347e-90	4_preHC
Rtl3	8.37432e-94	0.531679	0.821	0.344	0.477	1.88548e-89	4_preHC
Prelid1	4.39549e-93	0.527773	0.983	0.838	0.145	9.89646e-89	4_preHC
Tmem176b	6.6629e-93	-1.29217	0.766	0.851	-0.085	1.50015e-88	4_preHC
Fscn1	7.1606e-93	0.557688	0.99	0.794	0.196	1.61221e-88	4_preHC
Arfgef3	1.15938e-92	0.281	0.481	0.12	0.361	2.61034e-88	4_preHC
Wif1	2.23536e-92	-2.00713	0.075	0.486	-0.411	5.0329e-88	4_preHC
Cdv3	2.27458e-92	0.536425	0.986	0.853	0.133	5.12122e-88	4_preHC
Bmp1	4.14137e-92	-1.42898	0.605	0.768	-0.163	9.3243e-88	4_preHC
Cd63	7.97307e-92	-1.03177	1	0.997	0.003	1.79514e-87	4_preHC
Mfap2	1.40251e-91	-1.11899	0.339	0.667	-0.328	3.15776e-87	4_preHC
Ccdc80	1.55536e-91	0.796955	0.977	0.758	0.219	3.5019e-87	4_preHC
Dnaja1	2.84038e-91	-0.987068	0.913	0.923	-0.01	6.39511e-87	4_preHC
Ier3ip1	4.10741e-91	0.597937	0.979	0.874	0.105	9.24784e-87	4_preHC
Kazald1	6.8716e-91	-1.22759	0.097	0.501	-0.404	1.54714e-86	4_preHC
Srpx2	6.87368e-91	-0.879881	0.045	0.457	-0.412	1.54761e-86	4_preHC
Ero1l	9.37726e-91	0.543601	0.853	0.414	0.439	2.11129e-86	4_preHC
Sec22b	1.10565e-90	0.490589	0.984	0.801	0.183	2.48937e-86	4_preHC
Dcn	1.26931e-90	-2.06868	0.876	0.868	0.008	2.85785e-86	4_preHC
Hist1h2ac	1.49661e-90	0.770968	0.597	0.213	0.384	3.36962e-86	4_preHC
Atp2b1	1.74913e-90	0.601082	0.994	0.895	0.099	3.93816e-86	4_preHC
Impad1	2.74577e-90	0.554253	0.969	0.756	0.213	6.18209e-86	4_preHC
Rps25	3.52637e-90	0.481285	0.996	0.996	0	7.93962e-86	4_preHC
Sec61b	7.15405e-90	0.551885	0.994	0.979	0.015	1.61073e-85	4_preHC
Hebp2	7.49272e-90	0.330862	0.581	0.184	0.397	1.68699e-85	4_preHC
Mxra8	1.09183e-89	-1.02355	0.206	0.566	-0.36	2.45827e-85	4_preHC
Ltv1	1.3071e-89	0.479226	0.896	0.503	0.393	2.94295e-85	4_preHC
Adamts2	1.70105e-89	-1.23093	0.038	0.447	-0.409	3.8299e-85	4_preHC
Cnn2	2.45622e-89	-1.3109	0.247	0.596	-0.349	5.53019e-85	4_preHC
Prr5	2.84613e-89	0.387158	0.79	0.331	0.459	6.40807e-85	4_preHC
Atp6v0e	3.07414e-89	0.50699	0.989	0.864	0.125	6.92143e-85	4_preHC
Spats2l	3.53728e-89	0.45222	0.877	0.436	0.441	7.96418e-85	4_preHC
Cdk6	1.82852e-88	0.54364	0.893	0.49	0.403	4.11692e-84	4_preHC
Lmna	3.12689e-88	-0.91328	0.898	0.933	-0.035	7.04019e-84	4_preHC
Lhfp	8.05355e-88	-0.898039	0.039	0.442	-0.403	1.81326e-83	4_preHC
Trappc6a	9.08677e-88	0.525129	0.92	0.559	0.361	2.04589e-83	4_preHC
Hist1h2bc	9.9305e-88	0.768285	0.955	0.673	0.282	2.23585e-83	4_preHC
Tmed9	1.52963e-87	0.419213	1	0.981	0.019	3.44396e-83	4_preHC
Sec61g	3.29996e-87	0.445342	0.987	0.979	0.008	7.42985e-83	4_preHC
Zfp385b	3.37278e-87	0.403244	0.81	0.361	0.449	7.5938e-83	4_preHC
Susd5	4.18972e-87	0.549312	0.986	0.523	0.463	9.43316e-83	4_preHC
Ldlrad3	1.1005e-86	0.39226	0.848	0.397	0.451	2.47777e-82	4_preHC
Dock8	1.45503e-86	0.249444	0.561	0.169	0.392	3.276e-82	4_preHC
Cpa6	2.15735e-86	0.249678	0.485	0.129	0.356	4.85728e-82	4_preHC
Tnni2	2.62631e-86	0.485596	0.409	0.096	0.313	5.91313e-82	4_preHC
Rpl36al	2.65176e-86	0.433789	0.993	0.968	0.025	5.97045e-82	4_preHC
Igfbp4	5.89668e-86	-2.60773	0.181	0.551	-0.37	1.32764e-81	4_preHC
Eif5a2	9.30191e-86	0.211074	0.472	0.12	0.352	2.09432e-81	4_preHC
Zeb2	1.61951e-85	-1.06114	0.066	0.46	-0.394	3.64632e-81	4_preHC
Prrx1	1.76456e-85	-1.11071	0.092	0.481	-0.389	3.97292e-81	4_preHC
Plod2	3.46298e-85	0.611977	1	0.904	0.096	7.79691e-81	4_preHC
Anxa5	3.46767e-85	0.45619	0.994	0.971	0.023	7.80746e-81	4_preHC
Csgalnact1	4.15294e-85	0.461864	0.946	0.472	0.474	9.35034e-81	4_preHC
Adm2	2.11747e-84	0.315565	0.621	0.21	0.411	4.76749e-80	4_preHC
Swi5	3.79486e-84	0.453568	0.984	0.957	0.027	8.54413e-80	4_preHC
Rpl12	4.14182e-84	0.431505	0.997	0.998	-0.001	9.3253e-80	4_preHC
Gtf2f2	4.317e-84	0.391492	0.825	0.383	0.442	9.71972e-80	4_preHC
Chsy1	6.5487e-84	0.60671	0.945	0.681	0.264	1.47444e-79	4_preHC
Sra1	7.933e-84	0.476069	0.975	0.742	0.233	1.78612e-79	4_preHC
Peg3	2.65911e-83	0.628402	1	0.785	0.215	5.987e-79	4_preHC
P4hb	3.33878e-83	0.428367	0.999	0.984	0.015	7.51725e-79	4_preHC
Mien1	4.81204e-83	0.47202	0.893	0.568	0.325	1.08343e-78	4_preHC
Trps1	6.25917e-83	0.620863	0.993	0.75	0.243	1.40925e-78	4_preHC
H2-DMb2	8.5301e-83	0.234005	0.481	0.13	0.351	1.92055e-78	4_preHC
Ibsp	9.85852e-83	-3.91282	0.172	0.531	-0.359	2.21965e-78	4_preHC
Enc1	1.72921e-82	0.427995	0.575	0.195	0.38	3.89331e-78	4_preHC
Olfml2b	2.71182e-82	-1.86349	0.059	0.446	-0.387	6.10566e-78	4_preHC
Sc5d	2.87892e-82	0.44087	0.858	0.421	0.437	6.48189e-78	4_preHC
Ctsk	3.31524e-82	-0.81348	0.351	0.637	-0.286	7.46427e-78	4_preHC
Sdc4	7.10207e-82	0.677745	0.999	0.9	0.099	1.59903e-77	4_preHC
Sidt2	1.13451e-81	0.526937	0.845	0.491	0.354	2.55435e-77	4_preHC
C1qtnf3	1.24147e-81	0.793296	0.994	0.537	0.457	2.79516e-77	4_preHC
Msi2	3.99221e-81	0.55312	0.992	0.771	0.221	8.98846e-77	4_preHC
Gas1	1.95193e-80	-1.26948	0.063	0.442	-0.379	4.39476e-76	4_preHC
Cd9	2.21896e-80	0.602517	1	0.958	0.042	4.99599e-76	4_preHC
Scarf2	4.23306e-80	-0.703595	0.639	0.808	-0.169	9.53073e-76	4_preHC
Tmem176a	4.772e-80	-1.08371	0.788	0.868	-0.08	1.07442e-75	4_preHC
Dpysl3	5.2996e-80	-1.21209	0.066	0.441	-0.375	1.1932e-75	4_preHC
Nomo1	5.8315e-80	0.429418	0.92	0.563	0.357	1.31296e-75	4_preHC
Ccnl1	1.62124e-79	-0.868229	0.743	0.842	-0.099	3.65022e-75	4_preHC
Pros1	6.24341e-79	-0.76223	0.173	0.529	-0.356	1.4057e-74	4_preHC
Rflna	7.00878e-79	0.346157	0.828	0.365	0.463	1.57803e-74	4_preHC
Rpl27a	8.09061e-79	0.364516	1	1	0	1.8216e-74	4_preHC
Cp	9.54279e-79	-1.32143	0.059	0.434	-0.375	2.14856e-74	4_preHC
Sdc2	1.24783e-78	-1.26699	0.663	0.77	-0.107	2.80948e-74	4_preHC
Mrps6	1.48759e-78	0.37755	0.822	0.411	0.411	3.34932e-74	4_preHC
Col9a1	1.50523e-78	0.887905	1	0.828	0.172	3.38902e-74	4_preHC
Nrk	2.48328e-78	0.637351	0.975	0.585	0.39	5.59111e-74	4_preHC
Vapa	3.35766e-78	0.463854	0.983	0.854	0.129	7.55976e-74	4_preHC
Sh3bgrl	5.31504e-78	-0.799488	0.539	0.73	-0.191	1.19668e-73	4_preHC
Tbc1d1	5.75985e-78	0.382766	0.767	0.367	0.4	1.29683e-73	4_preHC
Pde4dip	1.02805e-77	0.398791	0.845	0.436	0.409	2.31465e-73	4_preHC
H2-K1	1.32271e-77	0.606757	0.915	0.565	0.35	2.97808e-73	4_preHC
Map4k4	1.58161e-77	-0.871062	0.714	0.802	-0.088	3.56099e-73	4_preHC
Nebl	1.91279e-77	0.284653	0.48	0.145	0.335	4.30664e-73	4_preHC
Rpl5	6.47113e-77	0.391866	0.999	0.996	0.003	1.45698e-72	4_preHC
Rtraf	2.21236e-76	0.414461	0.986	0.957	0.029	4.98112e-72	4_preHC
Msmo1	3.61295e-76	0.53604	0.949	0.554	0.395	8.13455e-72	4_preHC
Tcf4	4.41257e-76	-0.774336	0.719	0.818	-0.099	9.93491e-72	4_preHC
mt-Co2	8.45524e-76	-0.543857	1	1	0	1.9037e-71	4_preHC
Nudt4	9.45489e-76	-1.15722	0.464	0.68	-0.216	2.12877e-71	4_preHC
Tspan6	9.60105e-76	-0.734072	0.54	0.723	-0.183	2.16168e-71	4_preHC
Sptlc2	1.09387e-75	0.372059	0.781	0.372	0.409	2.46286e-71	4_preHC
Ccng1	1.26185e-75	0.341584	0.801	0.381	0.42	2.84105e-71	4_preHC
Ssr1	1.27947e-75	0.425696	0.999	0.943	0.056	2.88072e-71	4_preHC
Nrp2	2.58383e-75	-1.20174	0.1	0.456	-0.356	5.8175e-71	4_preHC
C3	3.41597e-75	0.246433	0.368	0.084	0.284	7.69105e-71	4_preHC
Rps15	4.25877e-75	0.385362	1	0.999	0.001	9.58862e-71	4_preHC
Paics	7.61962e-75	0.481067	0.963	0.651	0.312	1.71556e-70	4_preHC
Plagl1	8.90698e-75	0.503568	0.996	0.852	0.144	2.00541e-70	4_preHC
Laptm4b	1.01778e-74	0.280507	0.626	0.236	0.39	2.29153e-70	4_preHC
Tmem30a	1.16563e-74	0.469256	0.975	0.726	0.249	2.62441e-70	4_preHC
Fkbp11	1.23227e-74	0.688097	0.98	0.788	0.192	2.77445e-70	4_preHC
Timm17a	1.95464e-74	0.438205	0.951	0.663	0.288	4.40087e-70	4_preHC
Hmgcr	2.83236e-74	0.525423	0.961	0.643	0.318	6.37706e-70	4_preHC
Cyr61	1.50947e-73	0.787572	0.99	0.892	0.098	3.39857e-69	4_preHC
Slc39a14	2.03531e-73	0.428805	0.944	0.568	0.376	4.5825e-69	4_preHC
Colgalt2	2.07758e-73	0.363365	0.911	0.422	0.489	4.67767e-69	4_preHC
Cpne8	2.1061e-73	0.387015	0.849	0.427	0.422	4.74188e-69	4_preHC
Antxr1	2.9083e-73	-0.940683	0.13	0.475	-0.345	6.54803e-69	4_preHC
Fam20b	5.03102e-73	0.383599	0.898	0.485	0.413	1.13273e-68	4_preHC
H3f3b	7.21917e-73	-0.610642	1	1	0	1.6254e-68	4_preHC
Pmvk	7.67998e-73	0.456661	0.907	0.541	0.366	1.72915e-68	4_preHC
Tubb5	1.38547e-72	-1.40972	0.88	0.89	-0.01	3.11938e-68	4_preHC
Grb14	1.67659e-72	0.477767	0.626	0.263	0.363	3.77484e-68	4_preHC
Btbd3	2.31437e-72	0.25587	0.537	0.179	0.358	5.21081e-68	4_preHC
Sox9	3.43668e-72	0.689661	0.993	0.773	0.22	7.73768e-68	4_preHC
Galk1	4.85168e-72	0.443649	0.963	0.716	0.247	1.09235e-67	4_preHC
Wsb1	1.1948e-71	-0.831986	0.604	0.746	-0.142	2.69009e-67	4_preHC
Vcan	3.18745e-71	-1.63661	0.058	0.406	-0.348	7.17654e-67	4_preHC
Atp5g1	3.33548e-71	0.412869	0.987	0.96	0.027	7.50984e-67	4_preHC
Rps17	3.827e-71	0.348937	0.99	0.995	-0.005	8.61649e-67	4_preHC
Osbpl1a	4.95704e-71	0.359012	0.749	0.357	0.392	1.11608e-66	4_preHC
Nfib	7.67315e-71	-0.720835	0.127	0.472	-0.345	1.72761e-66	4_preHC
Lss	1.21888e-70	0.253529	0.591	0.212	0.379	2.74431e-66	4_preHC
Cspg4	1.30216e-70	0.570986	0.997	0.708	0.289	2.93181e-66	4_preHC
Cthrc1	1.64071e-70	-1.53135	0.543	0.727	-0.184	3.69405e-66	4_preHC
Epyc	2.574e-70	0.70941	0.989	0.563	0.426	5.79536e-66	4_preHC
Olfml3	3.78338e-70	-1.38993	0.45	0.661	-0.211	8.51827e-66	4_preHC
Uqcr11	3.87948e-70	0.431536	0.98	0.916	0.064	8.73465e-66	4_preHC
Scarb1	6.01257e-70	0.357542	0.828	0.423	0.405	1.35373e-65	4_preHC
Slit2	6.02107e-70	-0.90049	0.072	0.414	-0.342	1.35564e-65	4_preHC
Nos1	7.38185e-70	0.203568	0.443	0.13	0.313	1.66202e-65	4_preHC
Gabarap	1.5717e-69	0.397037	0.99	0.973	0.017	3.53869e-65	4_preHC
Mrpl17	1.63485e-69	0.451216	0.973	0.738	0.235	3.68087e-65	4_preHC
Cebpb	4.07594e-69	-1.028	0.733	0.855	-0.122	9.17698e-65	4_preHC
Fxyd3	5.87231e-69	0.231445	0.362	0.087	0.275	1.32215e-64	4_preHC
Rpl26	7.08157e-69	0.384129	1	0.998	0.002	1.59442e-64	4_preHC
Hdlbp	1.41756e-68	0.400196	0.996	0.968	0.028	3.19164e-64	4_preHC
Tagln2	1.67168e-68	-1.1119	0.386	0.633	-0.247	3.76378e-64	4_preHC
Eprs	1.82302e-68	0.439281	0.99	0.872	0.118	4.10453e-64	4_preHC
Hint3	3.14747e-68	0.313971	0.755	0.345	0.41	7.08652e-64	4_preHC
Qsox1	3.15292e-68	-1.02419	0.525	0.688	-0.163	7.0988e-64	4_preHC
Arpc1b	3.53046e-68	-0.735422	0.831	0.883	-0.052	7.94883e-64	4_preHC
C1qtnf6	3.93488e-68	-0.736965	0.642	0.758	-0.116	8.85938e-64	4_preHC
H2-Q7	5.56892e-68	0.270213	0.553	0.197	0.356	1.25384e-63	4_preHC
Slit3	1.09189e-67	-0.601301	0.031	0.365	-0.334	2.45839e-63	4_preHC
Klf6	1.74066e-67	-1.21102	0.474	0.683	-0.209	3.91909e-63	4_preHC
Col9a3	2.73829e-67	0.834634	1	0.833	0.167	6.16525e-63	4_preHC
Inpp1	3.1252e-67	0.298511	0.746	0.34	0.406	7.03639e-63	4_preHC
Cnmd	4.90828e-67	0.81828	1	0.639	0.361	1.1051e-62	4_preHC
Eva1b	6.36691e-67	-0.641602	0.601	0.782	-0.181	1.43351e-62	4_preHC
Myo5a	7.04885e-67	0.441862	0.728	0.361	0.367	1.58705e-62	4_preHC
Uck2	9.39476e-67	0.364108	0.831	0.438	0.393	2.11523e-62	4_preHC
Rpl22	9.74624e-67	0.370067	0.994	0.997	-0.003	2.19437e-62	4_preHC
Rpl32	1.52117e-66	0.363507	1	0.999	0.001	3.42492e-62	4_preHC
Gng2	1.60041e-66	0.296917	0.725	0.32	0.405	3.60333e-62	4_preHC
Bnip3l	1.65575e-66	0.504516	0.973	0.805	0.168	3.72791e-62	4_preHC
Srm	4.3598e-66	0.511497	0.956	0.733	0.223	9.81608e-62	4_preHC
Prelp	4.92346e-66	0.671616	0.952	0.54	0.412	1.10852e-61	4_preHC
Ss18l2	5.93206e-66	0.39375	0.88	0.526	0.354	1.3356e-61	4_preHC
Frmd6	1.07708e-65	-0.876602	0.392	0.623	-0.231	2.42504e-61	4_preHC
Twist1	1.6542e-65	-0.793289	0.068	0.394	-0.326	3.72444e-61	4_preHC
Anxa8	1.80413e-65	0.271555	0.628	0.243	0.385	4.06201e-61	4_preHC
Mdk	1.82724e-65	-1.44347	0.228	0.529	-0.301	4.11403e-61	4_preHC
Fam129b	1.9997e-65	0.418424	0.904	0.52	0.384	4.50233e-61	4_preHC
Ctsc	5.45197e-65	-0.932739	0.042	0.368	-0.326	1.22751e-60	4_preHC
Slc35a3	6.52255e-65	0.277013	0.762	0.353	0.409	1.46855e-60	4_preHC
Flna	7.92597e-65	-0.89126	0.371	0.621	-0.25	1.78453e-60	4_preHC
Trim47	1.01148e-64	0.358758	0.836	0.429	0.407	2.27736e-60	4_preHC
Ssbp4	1.11903e-64	-0.534756	0.127	0.447	-0.32	2.51951e-60	4_preHC
Calu	1.70528e-64	0.354525	1	0.983	0.017	3.83944e-60	4_preHC
Sqle	1.95248e-64	0.369845	0.882	0.475	0.407	4.39601e-60	4_preHC
Rpl4	2.35624e-64	0.370058	1	0.994	0.006	5.30508e-60	4_preHC
C1qtnf4	3.17723e-64	0.383419	0.798	0.389	0.409	7.15354e-60	4_preHC
Rcn1	3.55991e-64	0.412913	0.994	0.926	0.068	8.01513e-60	4_preHC
Psap	5.66462e-64	-0.633604	0.953	0.948	0.005	1.27539e-59	4_preHC
Tmco3	9.81265e-64	0.310968	0.626	0.264	0.362	2.20932e-59	4_preHC
Cpxm1	1.06634e-63	-0.783705	0.348	0.6	-0.252	2.40086e-59	4_preHC
Akt2	1.09502e-63	0.395055	0.917	0.598	0.319	2.46544e-59	4_preHC
Satb2	1.61521e-63	-0.7305	0.034	0.352	-0.318	3.63665e-59	4_preHC
Ltbp3	1.68154e-63	-0.62796	0.406	0.626	-0.22	3.78598e-59	4_preHC
Pla2g12a	2.8507e-63	0.334194	0.721	0.325	0.396	6.41835e-59	4_preHC
Rps23	3.77784e-63	0.319315	1	0.998	0.002	8.5058e-59	4_preHC
Gna12	4.43189e-63	0.357726	0.898	0.537	0.361	9.9784e-59	4_preHC
Med12	4.63388e-63	0.269969	0.666	0.288	0.378	1.04332e-58	4_preHC
Cfl1	6.2339e-63	-0.768979	0.969	0.961	0.008	1.40356e-58	4_preHC
Smarcb1	1.15464e-62	0.376743	0.889	0.586	0.303	2.59967e-58	4_preHC
Tpd52	1.78448e-62	0.26486	0.664	0.278	0.386	4.01776e-58	4_preHC
Rplp1	2.16064e-62	0.301792	1	1	0	4.86467e-58	4_preHC
S1pr3	8.6183e-62	-0.722111	0.034	0.346	-0.312	1.94041e-57	4_preHC
Kctd12	8.87535e-62	-1.09874	0.185	0.486	-0.301	1.99829e-57	4_preHC
Bcat1	9.74771e-62	0.300478	0.773	0.372	0.401	2.1947e-57	4_preHC
Pfkp	1.65495e-61	0.286297	0.721	0.325	0.396	3.72613e-57	4_preHC
Sox4	2.57031e-61	-1.09789	0.34	0.589	-0.249	5.78706e-57	4_preHC
Igfbp5	2.69113e-61	-2.59046	0.066	0.381	-0.315	6.05908e-57	4_preHC
Tmem238	3.00029e-61	0.336067	0.825	0.428	0.397	6.75516e-57	4_preHC
Rpl35a	3.78528e-61	0.366475	0.999	0.999	0	8.52256e-57	4_preHC
Pfkl	3.94081e-61	0.349265	0.884	0.498	0.386	8.87274e-57	4_preHC
Lrrc59	3.9794e-61	0.411529	0.983	0.85	0.133	8.95962e-57	4_preHC
Col5a2	4.28e-61	-2.29835	0.639	0.703	-0.064	9.63643e-57	4_preHC
Taf13	4.54798e-61	0.368421	0.874	0.521	0.353	1.02398e-56	4_preHC
Tpm2	4.73448e-61	-1.21912	0.107	0.416	-0.309	1.06597e-56	4_preHC
Pdk1	5.13802e-61	0.295969	0.827	0.42	0.407	1.15683e-56	4_preHC
Slc35b2	6.25437e-61	0.412235	0.959	0.732	0.227	1.40817e-56	4_preHC
Fam120a	7.08798e-61	0.392584	0.963	0.689	0.274	1.59586e-56	4_preHC
Hacd1	1.00109e-60	0.38554	0.956	0.641	0.315	2.25395e-56	4_preHC
Tns2	1.2634e-60	0.328507	0.78	0.393	0.387	2.84454e-56	4_preHC
Rps12	1.95761e-60	0.281487	0.999	0.999	0	4.40757e-56	4_preHC
Adam12	2.37514e-60	-0.636074	0.12	0.421	-0.301	5.34763e-56	4_preHC
Cercam	2.47615e-60	0.311762	0.756	0.368	0.388	5.57504e-56	4_preHC
Srp19	3.40916e-60	0.383056	0.966	0.775	0.191	7.67573e-56	4_preHC
Pmp22	3.50839e-60	0.637605	0.91	0.597	0.313	7.89915e-56	4_preHC
Ppfibp1	4.06925e-60	0.408512	0.862	0.535	0.327	9.16192e-56	4_preHC
Adamts5	4.64652e-60	-0.914319	0.106	0.415	-0.309	1.04616e-55	4_preHC
Rps24	4.77702e-60	0.321472	1	1	0	1.07555e-55	4_preHC
Spcs1	9.25911e-60	0.37219	0.987	0.931	0.056	2.08469e-55	4_preHC
Rps2	9.91982e-60	0.293525	1	1	0	2.23345e-55	4_preHC
Strbp	1.01385e-59	0.258268	0.608	0.256	0.352	2.28269e-55	4_preHC
Gpx3	1.06858e-59	-1.12002	0.147	0.441	-0.294	2.4059e-55	4_preHC
Cks2	1.585e-59	-1.12029	0.391	0.589	-0.198	3.56863e-55	4_preHC
Sobp	1.69184e-59	0.375531	0.913	0.546	0.367	3.80919e-55	4_preHC
Rps10	2.21754e-59	0.319584	1	0.999	0.001	4.9928e-55	4_preHC
Mmp13	2.35197e-59	-3.75019	0.161	0.452	-0.291	5.29545e-55	4_preHC
Stk17b	2.75805e-59	-0.669152	0.206	0.489	-0.283	6.20975e-55	4_preHC
Cab39l	3.15394e-59	0.248084	0.685	0.305	0.38	7.1011e-55	4_preHC
Lmcd1	3.96742e-59	0.496118	0.594	0.256	0.338	8.93264e-55	4_preHC
Chac1	4.23012e-59	0.287482	0.598	0.249	0.349	9.52411e-55	4_preHC
Gpsm2	4.79005e-59	0.277905	0.743	0.354	0.389	1.07848e-54	4_preHC
Ddt	9.1778e-59	0.39257	0.904	0.602	0.302	2.06638e-54	4_preHC
Dhx32	1.0458e-58	0.366448	0.661	0.321	0.34	2.35462e-54	4_preHC
Cox17	1.1237e-58	0.347777	0.92	0.575	0.345	2.53e-54	4_preHC
Sh3pxd2b	1.20557e-58	-0.661182	0.169	0.457	-0.288	2.71435e-54	4_preHC
Copb2	1.92122e-58	0.406005	0.986	0.865	0.121	4.32563e-54	4_preHC
Fth1	2.19307e-58	-0.701526	0.997	0.996	0.001	4.9377e-54	4_preHC
Pdrg1	3.41977e-58	0.459714	0.953	0.653	0.3	7.69961e-54	4_preHC
Fgfr2	3.46422e-58	-0.766147	0.26	0.53	-0.27	7.79969e-54	4_preHC
Siah2	4.3095e-58	0.3678	0.791	0.443	0.348	9.70285e-54	4_preHC
Matn1	7.19616e-58	0.576802	1	0.646	0.354	1.62022e-53	4_preHC
Mvd	7.2237e-58	0.24891	0.611	0.252	0.359	1.62642e-53	4_preHC
Ddah2	7.24539e-58	-0.555856	0.023	0.319	-0.296	1.6313e-53	4_preHC
Mrc2	8.14724e-58	-0.643929	0.584	0.721	-0.137	1.83435e-53	4_preHC
Vldlr	1.14838e-57	0.334903	0.749	0.359	0.39	2.58557e-53	4_preHC
Nrbp2	1.23332e-57	0.299437	0.753	0.369	0.384	2.77683e-53	4_preHC
Mboat2	1.24398e-57	0.257654	0.711	0.33	0.381	2.80083e-53	4_preHC
Cyp51	1.55288e-57	0.433589	0.952	0.619	0.333	3.4963e-53	4_preHC
Rpn1	1.61009e-57	0.398242	0.987	0.885	0.102	3.62512e-53	4_preHC
Vim	1.61523e-57	-1.01095	0.979	0.972	0.007	3.63668e-53	4_preHC
Id1	1.61988e-57	0.456338	0.883	0.531	0.352	3.64715e-53	4_preHC
Aff3	1.76818e-57	0.252311	0.628	0.271	0.357	3.98105e-53	4_preHC
Mme	2.63331e-57	-1.01688	0.135	0.43	-0.295	5.92891e-53	4_preHC
Idi1	3.63444e-57	0.43482	0.907	0.538	0.369	8.18293e-53	4_preHC
H2-D1	3.853e-57	-0.950417	0.307	0.545	-0.238	8.67504e-53	4_preHC
Bcl7a	8.02319e-57	0.20044	0.529	0.197	0.332	1.80642e-52	4_preHC
Myo1b	1.00638e-56	-0.607188	0.102	0.397	-0.295	2.26586e-52	4_preHC
Txnip	1.25448e-56	0.532629	0.811	0.481	0.33	2.82447e-52	4_preHC
3632451O06Rik	1.26073e-56	0.298916	0.797	0.401	0.396	2.83853e-52	4_preHC
2310039H08Rik	1.31157e-56	0.372143	0.935	0.637	0.298	2.953e-52	4_preHC
Lman1	1.51005e-56	0.401277	0.994	0.93	0.064	3.39987e-52	4_preHC
Cpe	1.86841e-56	0.56526	0.996	0.925	0.071	4.20672e-52	4_preHC
Fads1	1.92829e-56	0.346493	0.894	0.553	0.341	4.34154e-52	4_preHC
Insig1	2.16727e-56	0.454705	0.97	0.736	0.234	4.87962e-52	4_preHC
Gnb4	2.32927e-56	0.40455	0.834	0.482	0.352	5.24436e-52	4_preHC
Fkbp9	2.39667e-56	0.426603	1	0.956	0.044	5.39611e-52	4_preHC
Mrps16	2.50382e-56	0.444388	0.937	0.72	0.217	5.63736e-52	4_preHC
Slc43a2	2.61073e-56	0.211831	0.341	0.095	0.246	5.87806e-52	4_preHC
Uqcc2	2.97298e-56	0.352707	0.979	0.855	0.124	6.69367e-52	4_preHC
Snhg6	4.55998e-56	0.486759	0.973	0.788	0.185	1.02668e-51	4_preHC
Ccdc115	4.85556e-56	0.234769	0.674	0.292	0.382	1.09323e-51	4_preHC
Cyba	1.02068e-55	-0.634642	0.467	0.637	-0.17	2.29807e-51	4_preHC
Clcn3	1.14939e-55	0.217426	0.612	0.257	0.355	2.58785e-51	4_preHC
Foxn3	1.3955e-55	-0.73766	0.494	0.649	-0.155	3.14196e-51	4_preHC
Htatsf1	1.46282e-55	0.382666	0.918	0.648	0.27	3.29353e-51	4_preHC
Rps7	1.97813e-55	0.334734	0.997	0.998	-0.001	4.45375e-51	4_preHC
Cd1d1	2.0925e-55	-0.499733	0.02	0.304	-0.284	4.71127e-51	4_preHC
Stox2	3.65382e-55	-0.508916	0.032	0.321	-0.289	8.22657e-51	4_preHC
Zfhx4	4.1011e-55	-0.919977	0.124	0.41	-0.286	9.23362e-51	4_preHC
Tlcd1	5.98381e-55	0.242383	0.566	0.244	0.322	1.34726e-50	4_preHC
Pard6g	7.59076e-55	-0.605494	0.109	0.396	-0.287	1.70906e-50	4_preHC
Angptl4	8.04579e-55	-0.757332	0.055	0.344	-0.289	1.81151e-50	4_preHC
Rps8	9.53476e-55	0.276836	1	1	0	2.14675e-50	4_preHC
Hmgb1	1.04966e-54	-0.591776	0.989	0.985	0.004	2.36331e-50	4_preHC
Rack1	2.99417e-54	0.289413	0.999	1	-0.001	6.74136e-50	4_preHC
Rap1b	4.0284e-54	-0.637647	0.753	0.803	-0.05	9.06995e-50	4_preHC
Dhcr24	9.2488e-54	0.273474	0.752	0.363	0.389	2.08237e-49	4_preHC
Serpinf1	1.03396e-53	-2.29176	0.281	0.515	-0.234	2.32797e-49	4_preHC
Rps18	1.12626e-53	0.315105	0.999	0.999	0	2.53577e-49	4_preHC
Ptn	3.75015e-53	-0.970072	0.116	0.404	-0.288	8.44347e-49	4_preHC
Lpl	7.23865e-53	-0.815576	0.804	0.397	0.407	1.62978e-48	4_preHC
App	8.31171e-53	-0.485096	0.983	0.968	0.015	1.87138e-48	4_preHC
Arf5	1.35537e-52	-0.447074	0.989	0.983	0.006	3.05162e-48	4_preHC
Tead2	1.72669e-52	-0.447562	0.03	0.305	-0.275	3.88764e-48	4_preHC
Actn1	1.774e-52	-0.59679	0.458	0.646	-0.188	3.99416e-48	4_preHC
Rpl31	2.31831e-52	0.289367	0.997	0.989	0.008	5.21967e-48	4_preHC
Rpl30	2.76999e-52	0.310897	1	0.999	0.001	6.23662e-48	4_preHC
Prelid2	2.96239e-52	0.205712	0.508	0.198	0.31	6.66982e-48	4_preHC
Ddb1	3.74143e-52	0.342706	0.984	0.905	0.079	8.42382e-48	4_preHC
Mbnl1	3.9469e-52	0.403787	0.982	0.835	0.147	8.88644e-48	4_preHC
Rpl14	3.94933e-52	0.279208	0.997	0.997	0	8.89191e-48	4_preHC
Sparcl1	4.26298e-52	0.287088	0.718	0.333	0.385	9.59811e-48	4_preHC
Nsun2	4.58536e-52	0.32267	0.89	0.527	0.363	1.03239e-47	4_preHC
Col5a1	4.85501e-52	-1.29008	0.601	0.713	-0.112	1.09311e-47	4_preHC
Ptms	5.8362e-52	-0.601394	0.937	0.932	0.005	1.31402e-47	4_preHC
Pdgfra	8.63591e-52	-0.470898	0.035	0.31	-0.275	1.94438e-47	4_preHC
Rsrp1	8.88435e-52	-0.808318	0.726	0.776	-0.05	2.00031e-47	4_preHC
Pcyt2	1.02195e-51	0.254975	0.671	0.319	0.352	2.30092e-47	4_preHC
A2m	1.03746e-51	0.254357	0.639	0.284	0.355	2.33584e-47	4_preHC
Mia	1.61748e-51	0.601539	0.993	0.58	0.413	3.64175e-47	4_preHC
Cdc34	1.65413e-51	0.240101	0.711	0.349	0.362	3.72428e-47	4_preHC
mt-Cytb	2.00321e-51	-0.443873	1	1	0	4.51023e-47	4_preHC
Ndufa4	2.0115e-51	-0.59079	0.962	0.945	0.017	4.52888e-47	4_preHC
Smad7	2.04465e-51	0.420687	0.966	0.788	0.178	4.60353e-47	4_preHC
Mthfd1l	2.6688e-51	0.267357	0.666	0.323	0.343	6.0088e-47	4_preHC
Islr	4.6238e-51	-0.825987	0.869	0.822	0.047	1.04105e-46	4_preHC
Crispld1	4.74807e-51	0.50349	0.748	0.417	0.331	1.06903e-46	4_preHC
Slc43a3	5.36417e-51	0.290365	0.876	0.474	0.402	1.20774e-46	4_preHC
Guk1	6.5336e-51	0.372486	0.924	0.64	0.284	1.47104e-46	4_preHC
Ckb	9.6961e-51	-1.26593	0.449	0.612	-0.163	2.18308e-46	4_preHC
Bod1	9.74138e-51	0.360598	0.835	0.524	0.311	2.19327e-46	4_preHC
Efcab1	1.0471e-50	0.213821	0.724	0.328	0.396	2.35755e-46	4_preHC
Gfpt1	1.15554e-50	0.332183	0.955	0.645	0.31	2.6017e-46	4_preHC
Tgfb2	1.17845e-50	0.267455	0.896	0.547	0.349	2.65328e-46	4_preHC
Nt5e	1.36013e-50	0.282253	0.755	0.386	0.369	3.06234e-46	4_preHC
Postn	1.45002e-50	-1.48354	0.056	0.327	-0.271	3.26471e-46	4_preHC
Kcnq1ot1	1.61219e-50	0.601922	0.975	0.802	0.173	3.62984e-46	4_preHC
Rpl18a	1.7677e-50	0.300174	1	1	0	3.97998e-46	4_preHC
Lifr	1.95383e-50	-1.03013	0.54	0.667	-0.127	4.39904e-46	4_preHC
Gorasp2	2.53564e-50	0.328547	0.984	0.799	0.185	5.70899e-46	4_preHC
Cisd1	3.42662e-50	0.3198	0.898	0.581	0.317	7.71504e-46	4_preHC
Zfp36l2	4.64494e-50	-0.74836	0.409	0.622	-0.213	1.04581e-45	4_preHC
Steap1	4.83601e-50	0.21549	0.614	0.266	0.348	1.08883e-45	4_preHC
Prkar1a	8.55663e-50	-0.513637	0.865	0.863	0.002	1.92653e-45	4_preHC
Gbe1	8.87958e-50	0.230487	0.535	0.219	0.316	1.99924e-45	4_preHC
Maged1	1.12197e-49	-0.49381	0.935	0.971	-0.036	2.52611e-45	4_preHC
Mgat4a	2.28299e-49	0.217188	0.663	0.306	0.357	5.14015e-45	4_preHC
H19	2.86685e-49	0.643425	0.992	0.781	0.211	6.45472e-45	4_preHC
Oat	3.00292e-49	0.344589	0.992	0.902	0.09	6.76108e-45	4_preHC
Atg3	3.46064e-49	0.355085	0.872	0.559	0.313	7.79163e-45	4_preHC
Batf3	3.54797e-49	0.255211	0.669	0.308	0.361	7.98826e-45	4_preHC
Rasgrp2	4.56115e-49	-0.606151	0.032	0.295	-0.263	1.02694e-44	4_preHC
mt-Nd4	7.48801e-49	-0.386361	1	1	0	1.68592e-44	4_preHC
Cd302	8.79372e-49	-0.709817	0.571	0.681	-0.11	1.97991e-44	4_preHC
Csf1	9.176e-49	-0.805576	0.092	0.357	-0.265	2.06598e-44	4_preHC
Cxcl12	1.03043e-48	-3.3362	0.069	0.335	-0.266	2.32001e-44	4_preHC
Clmp	1.37654e-48	-0.659537	0.293	0.531	-0.238	3.09928e-44	4_preHC
Ugdh	1.49079e-48	0.373485	0.992	0.842	0.15	3.35651e-44	4_preHC
Emc6	1.83216e-48	0.318158	0.92	0.61	0.31	4.12511e-44	4_preHC
Tspo	1.99576e-48	-0.592203	0.309	0.53	-0.221	4.49345e-44	4_preHC
Eef2	2.66324e-48	0.284455	1	0.998	0.002	5.99628e-44	4_preHC
Ndufv3	2.71989e-48	0.362406	0.955	0.761	0.194	6.12382e-44	4_preHC
S100b	2.96642e-48	0.36481	0.972	0.596	0.376	6.67889e-44	4_preHC
Gnas	3.09239e-48	0.220897	1	0.998	0.002	6.96252e-44	4_preHC
Ostc	7.44976e-48	0.335514	0.992	0.969	0.023	1.67731e-43	4_preHC
Rpl17	8.2029e-48	0.335838	0.997	0.996	0.001	1.84688e-43	4_preHC
Wwp2	8.36581e-48	0.263879	0.993	0.699	0.294	1.88356e-43	4_preHC
Fam114a1	1.06339e-47	0.328458	0.917	0.628	0.289	2.39423e-43	4_preHC
Gfpt2	1.38566e-47	0.214819	0.794	0.408	0.386	3.11981e-43	4_preHC
Nav3	1.41823e-47	-0.543361	0.014	0.265	-0.251	3.19315e-43	4_preHC
Emp3	1.46742e-47	-0.566893	0.88	0.921	-0.041	3.30389e-43	4_preHC
Itga6	1.55208e-47	0.202782	0.683	0.316	0.367	3.49452e-43	4_preHC
Ncam1	1.74045e-47	-0.642055	0.532	0.672	-0.14	3.91862e-43	4_preHC
Dusp8	1.94174e-47	0.310857	0.525	0.233	0.292	4.37184e-43	4_preHC
Sf3b5	2.09154e-47	0.364716	0.962	0.791	0.171	4.7091e-43	4_preHC
Ndufa8	2.11457e-47	0.330667	0.977	0.825	0.152	4.76095e-43	4_preHC
Fcgrt	3.13276e-47	-0.564846	0.496	0.643	-0.147	7.05341e-43	4_preHC
Calr	3.21409e-47	0.337455	1	0.994	0.006	7.23652e-43	4_preHC
Impa2	4.58334e-47	0.260821	0.763	0.399	0.364	1.03194e-42	4_preHC
Atpif1	4.63251e-47	-0.440885	0.975	0.963	0.012	1.04301e-42	4_preHC
Lsp1	4.64895e-47	0.302068	0.719	0.364	0.355	1.04671e-42	4_preHC
Mcu	4.83079e-47	0.235116	0.732	0.371	0.361	1.08765e-42	4_preHC
Fbn1	4.99692e-47	-1.35148	0.096	0.355	-0.259	1.12506e-42	4_preHC
Nsg1	6.64414e-47	-0.468938	0.025	0.278	-0.253	1.49593e-42	4_preHC
Sec23a	6.82374e-47	0.306066	0.921	0.627	0.294	1.53636e-42	4_preHC
Sdc1	8.30109e-47	-0.620165	0.295	0.514	-0.219	1.86899e-42	4_preHC
Rpl37	8.59933e-47	0.275664	0.997	1	-0.003	1.93614e-42	4_preHC
Pam16	9.24885e-47	0.316086	0.924	0.631	0.293	2.08238e-42	4_preHC
Pcolce2	9.63947e-47	0.432436	0.993	0.611	0.382	2.17033e-42	4_preHC
Tomm20	9.92008e-47	0.318802	0.992	0.96	0.032	2.23351e-42	4_preHC
AY036118	1.12669e-46	-0.590302	0.714	0.791	-0.077	2.53674e-42	4_preHC
Ufm1	1.13191e-46	0.3316	0.953	0.73	0.223	2.54849e-42	4_preHC
Clint1	1.21552e-46	0.355072	0.969	0.807	0.162	2.73674e-42	4_preHC
Cnnm4	1.28641e-46	0.218355	0.557	0.244	0.313	2.89635e-42	4_preHC
Limch1	1.3544e-46	-1.42167	0.274	0.501	-0.227	3.04942e-42	4_preHC
Loxl1	1.42482e-46	-0.686917	0.042	0.297	-0.255	3.20797e-42	4_preHC
H2afz	1.44431e-46	-0.97585	0.987	0.974	0.013	3.25185e-42	4_preHC
Fau	1.5429e-46	0.488535	1	0.999	0.001	3.47385e-42	4_preHC
Cox7a2	2.00447e-46	0.283583	0.992	0.97	0.022	4.51306e-42	4_preHC
Colgalt1	2.37168e-46	0.350361	0.979	0.824	0.155	5.33984e-42	4_preHC
Rpl7	2.704e-46	0.255738	0.999	0.998	0.001	6.08805e-42	4_preHC
Wbp2	3.89827e-46	0.209044	0.714	0.353	0.361	8.77696e-42	4_preHC
Slc36a2	5.74583e-46	-0.544535	0.01	0.251	-0.241	1.29367e-41	4_preHC
1500011K16Rik	5.96054e-46	0.2352	0.726	0.372	0.354	1.34201e-41	4_preHC
Pop5	7.58529e-46	0.241474	0.7	0.359	0.341	1.70783e-41	4_preHC
Abracl	8.16477e-46	-0.689342	0.519	0.65	-0.131	1.8383e-41	4_preHC
Acly	8.25509e-46	0.31409	0.867	0.559	0.308	1.85863e-41	4_preHC
Slc35a2	1.26745e-45	0.293668	0.907	0.581	0.326	2.85366e-41	4_preHC
Rnf126	1.7447e-45	0.326277	0.831	0.504	0.327	3.92819e-41	4_preHC
Fgfrl1	1.93355e-45	0.322928	0.935	0.576	0.359	4.35338e-41	4_preHC
Acat2	1.94721e-45	0.21647	0.612	0.28	0.332	4.38413e-41	4_preHC
Eef1b2	2.13172e-45	0.275632	0.997	0.996	0.001	4.79956e-41	4_preHC
Btg3	4.19982e-45	0.220967	0.702	0.353	0.349	9.4559e-41	4_preHC
Creb3l2	5.44721e-45	0.316367	0.963	0.693	0.27	1.22644e-40	4_preHC
Igsf3	6.66431e-45	-0.621656	0.528	0.653	-0.125	1.50047e-40	4_preHC
Col3a1	7.25744e-45	-2.25809	0.59	0.694	-0.104	1.63401e-40	4_preHC
Yipf5	8.62774e-45	0.315827	0.973	0.77	0.203	1.94254e-40	4_preHC
Surf4	1.49656e-44	0.339621	0.993	0.896	0.097	3.36951e-40	4_preHC
Yif1a	1.50543e-44	0.327475	0.961	0.723	0.238	3.38948e-40	4_preHC
Wls	1.54301e-44	-0.867505	0.615	0.694	-0.079	3.47408e-40	4_preHC
Copb1	2.21116e-44	0.324044	0.983	0.823	0.16	4.97843e-40	4_preHC
Ppfibp2	2.3356e-44	-0.41157	0.018	0.257	-0.239	5.25861e-40	4_preHC
Scrg1	2.99926e-44	0.459463	0.982	0.495	0.487	6.75283e-40	4_preHC
Pnrc1	3.21068e-44	-0.66323	0.749	0.792	-0.043	7.22884e-40	4_preHC
1700025G04Rik	3.33573e-44	0.298327	0.925	0.587	0.338	7.5104e-40	4_preHC
Rbbp6	3.77957e-44	-0.539463	0.842	0.84	0.002	8.5097e-40	4_preHC
Rps5	5.04851e-44	0.313844	1	0.999	0.001	1.13667e-39	4_preHC
Pabpc4	8.70856e-44	0.32946	0.952	0.696	0.256	1.96073e-39	4_preHC
Acaa2	9.25296e-44	-0.652155	0.278	0.493	-0.215	2.0833e-39	4_preHC
Tm4sf1	9.39093e-44	-0.710194	0.178	0.422	-0.244	2.11437e-39	4_preHC
Hnrnph1	1.08472e-43	-0.481495	0.953	0.931	0.022	2.44225e-39	4_preHC
Marcksl1	1.13625e-43	-0.677354	0.42	0.621	-0.201	2.55828e-39	4_preHC
Ldlr	1.1404e-43	0.32518	0.938	0.653	0.285	2.56761e-39	4_preHC
Tbx2	1.27565e-43	-0.404592	0.014	0.249	-0.235	2.87214e-39	4_preHC
Araf	1.72373e-43	0.239287	0.845	0.499	0.346	3.88098e-39	4_preHC
Jak1	1.94959e-43	-0.635918	0.608	0.687	-0.079	4.38951e-39	4_preHC
Fam213b	1.95358e-43	0.24557	0.671	0.34	0.331	4.39848e-39	4_preHC
Fbln1	2.09204e-43	-0.723906	0.206	0.437	-0.231	4.71023e-39	4_preHC
Ddah1	2.41272e-43	0.232483	0.726	0.374	0.352	5.43224e-39	4_preHC
Sigmar1	2.42833e-43	0.202807	0.629	0.299	0.33	5.46738e-39	4_preHC
Tnfsf11	2.58237e-43	-0.708427	0.018	0.251	-0.233	5.81421e-39	4_preHC
Thoc7	3.06445e-43	0.330513	0.965	0.791	0.174	6.89961e-39	4_preHC
Hmgn3	3.36162e-43	-0.630091	0.365	0.541	-0.176	7.56868e-39	4_preHC
Rps16	3.60886e-43	0.254121	1	0.999	0.001	8.12535e-39	4_preHC
D5Ertd579e	3.61736e-43	0.309574	0.763	0.429	0.334	8.14448e-39	4_preHC
Pdgfrb	4.17929e-43	-0.959854	0.076	0.321	-0.245	9.40968e-39	4_preHC
Raph1	5.23521e-43	0.355752	0.977	0.81	0.167	1.17871e-38	4_preHC
Anxa1	5.87544e-43	-1.01722	0.575	0.685	-0.11	1.32286e-38	4_preHC
Ddx5	6.24629e-43	-0.43015	1	0.995	0.005	1.40635e-38	4_preHC
Tmem132a	6.2522e-43	-0.360917	0.01	0.238	-0.228	1.40768e-38	4_preHC
Cpz	6.88004e-43	-0.740079	0.021	0.254	-0.233	1.54904e-38	4_preHC
Efna5	7.04976e-43	-0.56659	0.049	0.289	-0.24	1.58725e-38	4_preHC
Trpv4	8.07016e-43	0.334823	0.917	0.566	0.351	1.817e-38	4_preHC
Pdgfc	9.61313e-43	-0.350102	0.018	0.249	-0.231	2.1644e-38	4_preHC
Podnl1	1.01694e-42	-0.605779	0.034	0.269	-0.235	2.28963e-38	4_preHC
Sox5	1.06904e-42	0.242399	0.928	0.478	0.45	2.40695e-38	4_preHC
Fat1	1.41102e-42	-0.715509	0.738	0.758	-0.02	3.17691e-38	4_preHC
Tnfaip2	1.42447e-42	0.367807	0.594	0.296	0.298	3.2072e-38	4_preHC
Pim1	1.48223e-42	-0.734557	0.464	0.622	-0.158	3.33725e-38	4_preHC
Ssr4	1.69197e-42	0.352481	0.997	0.977	0.02	3.80948e-38	4_preHC
Rps3a1	2.78348e-42	0.240886	1	1	0	6.26702e-38	4_preHC
Rpl11	2.90115e-42	0.234644	0.999	1	-0.001	6.53194e-38	4_preHC
Fibin	3.15212e-42	0.284942	0.956	0.637	0.319	7.097e-38	4_preHC
Hspb11	3.53733e-42	0.333208	0.948	0.662	0.286	7.9643e-38	4_preHC
Cd44	4.0453e-42	-0.550781	0.199	0.444	-0.245	9.10798e-38	4_preHC
S100a1	4.64572e-42	0.348917	0.942	0.709	0.233	1.04598e-37	4_preHC
Gas6	5.69443e-42	-0.987777	0.158	0.392	-0.234	1.2821e-37	4_preHC
Adamts9	7.32946e-42	-0.680664	0.241	0.462	-0.221	1.65023e-37	4_preHC
Cfap36	8.16e-42	0.326472	0.829	0.523	0.306	1.83722e-37	4_preHC
Myl9	1.13619e-41	-1.06688	0.087	0.327	-0.24	2.55813e-37	4_preHC
Cmtm3	1.20045e-41	-0.47372	0.041	0.274	-0.233	2.70282e-37	4_preHC
Rnf144a	1.21478e-41	0.246466	0.715	0.39	0.325	2.73509e-37	4_preHC
Stmn1	1.6209e-41	-1.0447	0.217	0.449	-0.232	3.64945e-37	4_preHC
Slc39a7	1.68851e-41	0.316678	0.969	0.8	0.169	3.80169e-37	4_preHC
Nav1	1.83375e-41	-0.495593	0.199	0.431	-0.232	4.12869e-37	4_preHC
Gmcl1	1.94136e-41	0.209004	0.525	0.231	0.294	4.37096e-37	4_preHC
Slc35e1	2.03321e-41	0.20369	0.708	0.359	0.349	4.57778e-37	4_preHC
Mmp23	2.03936e-41	-0.625279	0.179	0.405	-0.226	4.59162e-37	4_preHC
Pik3r1	2.20021e-41	-0.609672	0.368	0.551	-0.183	4.95378e-37	4_preHC
Nfkbia	3.61349e-41	-0.82424	0.725	0.818	-0.093	8.13576e-37	4_preHC
Nfia	3.85903e-41	-0.507715	0.32	0.519	-0.199	8.68861e-37	4_preHC
Chka	3.86435e-41	-0.67622	0.449	0.608	-0.159	8.70059e-37	4_preHC
Chadl	3.88019e-41	0.277535	0.983	0.561	0.422	8.73624e-37	4_preHC
Rps28	5.34288e-41	0.263657	0.996	0.998	-0.002	1.20295e-36	4_preHC
Lpar1	7.42753e-41	0.305744	0.798	0.502	0.296	1.67231e-36	4_preHC
Zfp652	8.46842e-41	0.24696	0.729	0.407	0.322	1.90667e-36	4_preHC
Grn	8.52392e-41	-0.472191	0.571	0.665	-0.094	1.91916e-36	4_preHC
Srp14	8.95801e-41	0.255237	0.98	0.866	0.114	2.0169e-36	4_preHC
Ctgf	9.74754e-41	0.480334	0.97	0.818	0.152	2.19466e-36	4_preHC
Col13a1	1.17617e-40	-0.57309	0.031	0.257	-0.226	2.64814e-36	4_preHC
Cpq	1.66574e-40	-0.548409	0.525	0.627	-0.102	3.75041e-36	4_preHC
Thbs2	1.83242e-40	-0.616449	0.155	0.383	-0.228	4.1257e-36	4_preHC
Rpl10a	2.10912e-40	0.250151	0.999	0.999	0	4.74869e-36	4_preHC
Eif4ebp1	2.25994e-40	0.422266	0.945	0.71	0.235	5.08826e-36	4_preHC
Dnm3os	2.48193e-40	-0.385541	0.072	0.305	-0.233	5.58806e-36	4_preHC
Rbp1	3.29333e-40	-0.51887	0.047	0.276	-0.229	7.41493e-36	4_preHC
Dyrk1a	3.61504e-40	0.264538	0.824	0.484	0.34	8.13925e-36	4_preHC
Fus	4.12679e-40	-0.440218	0.982	0.97	0.012	9.29147e-36	4_preHC
Asns	4.30586e-40	0.280773	0.839	0.523	0.316	9.69464e-36	4_preHC
Rala	5.03786e-40	0.312973	0.915	0.663	0.252	1.13427e-35	4_preHC
Rbms3	5.18838e-40	-0.478238	0.042	0.27	-0.228	1.16816e-35	4_preHC
Pdia6	6.1083e-40	0.302661	0.999	0.968	0.031	1.37528e-35	4_preHC
Cdk14	6.95896e-40	-0.345403	0.087	0.321	-0.234	1.56681e-35	4_preHC
Trp53inp2	8.34692e-40	0.238645	0.742	0.41	0.332	1.87931e-35	4_preHC
Rps14	8.84971e-40	0.256167	0.999	1	-0.001	1.99251e-35	4_preHC
Col9a2	9.65188e-40	0.697183	1	0.786	0.214	2.17312e-35	4_preHC
Hspe1	1.02766e-39	0.348289	0.983	0.941	0.042	2.31379e-35	4_preHC
Jun	1.17325e-39	-0.857769	0.838	0.905	-0.067	2.64158e-35	4_preHC
Pycr1	1.34361e-39	0.220763	0.787	0.439	0.348	3.02514e-35	4_preHC
Fkbp7	1.73831e-39	-0.843195	0.614	0.663	-0.049	3.9138e-35	4_preHC
Kcnma1	1.8423e-39	0.229158	0.805	0.456	0.349	4.14793e-35	4_preHC
Ooep	1.99266e-39	0.283924	0.581	0.289	0.292	4.48648e-35	4_preHC
Mcl1	2.01364e-39	-0.492549	0.929	0.91	0.019	4.5337e-35	4_preHC
Itgb1	2.27664e-39	-0.517705	0.979	0.943	0.036	5.12586e-35	4_preHC
Sfrp4	2.29296e-39	-0.657256	0.024	0.244	-0.22	5.16259e-35	4_preHC
Mthfd2	2.30831e-39	0.314994	0.921	0.617	0.304	5.19717e-35	4_preHC
Zcchc24	2.35353e-39	-0.405327	0.114	0.349	-0.235	5.29898e-35	4_preHC
Rapgef2	2.73572e-39	0.260702	0.786	0.454	0.332	6.15948e-35	4_preHC
Rasl11a	2.84111e-39	-0.77619	0.094	0.324	-0.23	6.39675e-35	4_preHC
Slc16a1	3.06903e-39	0.228621	0.839	0.478	0.361	6.90993e-35	4_preHC
Rraga	3.41233e-39	0.248997	0.842	0.507	0.335	7.68285e-35	4_preHC
Calm2	4.36307e-39	-0.531254	0.982	0.97	0.012	9.82344e-35	4_preHC
Canx	4.49138e-39	0.295207	0.999	0.938	0.061	1.01124e-34	4_preHC
Pafah1b3	4.50605e-39	0.272489	0.859	0.532	0.327	1.01454e-34	4_preHC
Fasn	6.18768e-39	0.285202	0.858	0.532	0.326	1.39316e-34	4_preHC
Tra2b	6.2338e-39	-0.474327	0.91	0.876	0.034	1.40354e-34	4_preHC
Nedd4	9.08711e-39	0.262644	0.999	0.995	0.004	2.04596e-34	4_preHC
Eef1e1	9.90968e-39	0.234915	0.764	0.426	0.338	2.23116e-34	4_preHC
Pcolce	1.01409e-38	-0.875319	0.88	0.922	-0.042	2.28323e-34	4_preHC
Podxl2	1.09553e-38	-0.404163	0.085	0.31	-0.225	2.46659e-34	4_preHC
Ppic	1.1648e-38	-0.520771	0.972	0.97	0.002	2.62255e-34	4_preHC
Chst2	1.17794e-38	-0.429012	0.027	0.243	-0.216	2.65213e-34	4_preHC
Gpx8	1.21128e-38	-0.473025	0.907	0.889	0.018	2.7272e-34	4_preHC
Clu	1.22379e-38	-0.627443	0.085	0.317	-0.232	2.75536e-34	4_preHC
Clic1	1.25792e-38	-0.510657	0.818	0.803	0.015	2.83222e-34	4_preHC
Zcchc17	1.4677e-38	0.216024	0.766	0.439	0.327	3.30453e-34	4_preHC
Metrnl	1.49529e-38	-0.693004	0.295	0.473	-0.178	3.36665e-34	4_preHC
Psip1	1.54297e-38	-0.518317	0.474	0.593	-0.119	3.47399e-34	4_preHC
Aqp1	1.72027e-38	-0.466803	0.062	0.288	-0.226	3.87319e-34	4_preHC
Fxyd2	2.0271e-38	0.421919	0.368	0.148	0.22	4.56401e-34	4_preHC
Npdc1	2.8176e-38	-0.309561	0.024	0.239	-0.215	6.34382e-34	4_preHC
Krtcap2	3.23709e-38	0.26671	0.989	0.967	0.022	7.28831e-34	4_preHC
Raly	3.44753e-38	-0.499652	0.867	0.826	0.041	7.76212e-34	4_preHC
Oaz1	3.92971e-38	-0.320723	0.996	0.995	0.001	8.84774e-34	4_preHC
Igf1	4.25585e-38	-1.46986	0.024	0.236	-0.212	9.58204e-34	4_preHC
Dapk2	4.28984e-38	-0.672161	0.116	0.335	-0.219	9.65857e-34	4_preHC
Tex261	4.4524e-38	0.303584	0.898	0.628	0.27	1.00246e-33	4_preHC
Fam114a2	4.49342e-38	0.26043	0.872	0.57	0.302	1.01169e-33	4_preHC
Rpl28	4.53551e-38	0.31176	1	1	0	1.02117e-33	4_preHC
Nr4a2	4.53759e-38	-0.656148	0.329	0.527	-0.198	1.02164e-33	4_preHC
Mpzl1	7.02109e-38	-0.505587	0.629	0.699	-0.07	1.5808e-33	4_preHC
Plxna2	7.7999e-38	-0.704282	0.08	0.303	-0.223	1.75615e-33	4_preHC
Tmem263	8.93592e-38	0.282416	0.944	0.691	0.253	2.01192e-33	4_preHC
Cmpk1	9.51716e-38	0.318411	0.973	0.782	0.191	2.14279e-33	4_preHC
Vasn	1.02253e-37	-0.604714	0.769	0.801	-0.032	2.30223e-33	4_preHC
Enpp2	1.07151e-37	0.277072	0.451	0.2	0.251	2.4125e-33	4_preHC
Fdft1	1.18151e-37	0.228207	0.726	0.392	0.334	2.66017e-33	4_preHC
Ssr2	1.21748e-37	0.29618	1	0.978	0.022	2.74115e-33	4_preHC
Rftn2	1.74203e-37	0.206875	0.711	0.389	0.322	3.92218e-33	4_preHC
Pdlim2	1.79125e-37	-0.452802	0.061	0.279	-0.218	4.03299e-33	4_preHC
Anxa2	2.85555e-37	0.292323	0.993	0.952	0.041	6.42928e-33	4_preHC
Fyn	3.14039e-37	-0.475337	0.36	0.522	-0.162	7.07059e-33	4_preHC
Mafb	3.41689e-37	-0.701737	0.295	0.52	-0.225	7.69314e-33	4_preHC
Wisp1	3.78697e-37	-0.686407	0.355	0.527	-0.172	8.52635e-33	4_preHC
Ski	3.97966e-37	-0.445297	0.676	0.741	-0.065	8.9602e-33	4_preHC
Cdh15	5.19318e-37	-0.448344	0.014	0.217	-0.203	1.16924e-32	4_preHC
Dynll1	5.22202e-37	0.315616	0.994	0.976	0.018	1.17574e-32	4_preHC
Csrp1	7.48287e-37	-0.484593	0.285	0.475	-0.19	1.68477e-32	4_preHC
Nptn	8.4184e-37	-0.570282	0.8	0.789	0.011	1.8954e-32	4_preHC
Cox6a1	8.49404e-37	0.288032	0.989	0.915	0.074	1.91243e-32	4_preHC
Ahnak	8.57236e-37	-0.550307	0.911	0.911	0	1.93007e-32	4_preHC
H2afy2	9.73957e-37	-0.412243	0.275	0.468	-0.193	2.19286e-32	4_preHC
Pgrmc1	1.16348e-36	-0.570597	0.726	0.754	-0.028	2.61958e-32	4_preHC
Pxylp1	1.19442e-36	0.457045	0.773	0.501	0.272	2.68923e-32	4_preHC
Ccdc3	1.26796e-36	-0.556069	0.014	0.215	-0.201	2.8548e-32	4_preHC
Nr4a1	1.44449e-36	-0.69077	0.236	0.455	-0.219	3.25227e-32	4_preHC
Nfkbiz	1.54171e-36	-0.691942	0.427	0.584	-0.157	3.47116e-32	4_preHC
Hprt	1.66728e-36	0.26899	0.893	0.592	0.301	3.75388e-32	4_preHC
Cacnb3	1.80602e-36	-0.306055	0.065	0.282	-0.217	4.06625e-32	4_preHC
Zcchc14	2.06724e-36	-0.533265	0.394	0.547	-0.153	4.65438e-32	4_preHC
Med9	2.11069e-36	0.20889	0.783	0.428	0.355	4.75221e-32	4_preHC
Nudcd2	2.30819e-36	0.319394	0.941	0.761	0.18	5.19688e-32	4_preHC
Prcp	2.38694e-36	-0.525422	0.166	0.377	-0.211	5.37419e-32	4_preHC
Agpat3	2.84464e-36	-0.332652	0.086	0.304	-0.218	6.40471e-32	4_preHC
Maff	3.14832e-36	-0.61524	0.426	0.585	-0.159	7.08844e-32	4_preHC
Tgif1	3.31094e-36	-0.366523	0.085	0.304	-0.219	7.45459e-32	4_preHC
Myl12a	3.75981e-36	-0.54149	0.968	0.953	0.015	8.46522e-32	4_preHC
Reep3	4.0331e-36	-0.51979	0.674	0.718	-0.044	9.08053e-32	4_preHC
Nucb2	4.27054e-36	0.259692	0.883	0.6	0.283	9.61511e-32	4_preHC
Cavin3	5.07327e-36	0.327769	0.928	0.693	0.235	1.14225e-31	4_preHC
Uba5	5.07332e-36	0.231979	0.855	0.554	0.301	1.14226e-31	4_preHC
Ccnt2	5.54094e-36	0.238251	0.685	0.376	0.309	1.24754e-31	4_preHC
Plod3	7.88814e-36	0.260133	0.896	0.575	0.321	1.77602e-31	4_preHC
Frmd4a	8.00513e-36	-0.430433	0.205	0.416	-0.211	1.80236e-31	4_preHC
Itgav	8.37677e-36	-0.587412	0.474	0.581	-0.107	1.88603e-31	4_preHC
Slc1a5	9.18334e-36	0.211642	0.797	0.447	0.35	2.06763e-31	4_preHC
Irf1	9.31269e-36	-0.530702	0.169	0.38	-0.211	2.09675e-31	4_preHC
Cox4i1	9.46266e-36	-0.286232	0.996	0.996	0	2.13052e-31	4_preHC
P3h1	1.10289e-35	0.323881	0.994	0.868	0.126	2.48315e-31	4_preHC
Idh2	1.12448e-35	-0.455503	0.812	0.789	0.023	2.53176e-31	4_preHC
Selenok	1.12915e-35	0.249904	0.99	0.969	0.021	2.54227e-31	4_preHC
Plod1	1.18911e-35	0.319848	0.921	0.661	0.26	2.67729e-31	4_preHC
Stt3b	1.33597e-35	0.289184	0.946	0.716	0.23	3.00793e-31	4_preHC
Kitl	1.9823e-35	-0.739513	0.018	0.218	-0.2	4.46315e-31	4_preHC
Mbd2	2.11196e-35	0.271723	0.932	0.688	0.244	4.75508e-31	4_preHC
Ddr2	2.57018e-35	-0.418494	0.701	0.752	-0.051	5.78676e-31	4_preHC
Maf	2.63554e-35	-0.671507	0.238	0.444	-0.206	5.93392e-31	4_preHC
Cd81	3.26436e-35	-0.433116	0.99	0.972	0.018	7.34971e-31	4_preHC
Grpel1	4.36055e-35	0.209426	0.904	0.641	0.263	9.81779e-31	4_preHC
Adam10	5.14442e-35	-0.464775	0.214	0.411	-0.197	1.15827e-30	4_preHC
Aldh2	5.26401e-35	-0.441898	0.698	0.746	-0.048	1.18519e-30	4_preHC
Stard4	7.59385e-35	0.23946	0.708	0.399	0.309	1.70976e-30	4_preHC
Rtn4	9.26669e-35	-0.506156	0.953	0.905	0.048	2.08639e-30	4_preHC
Rpl23a	9.89563e-35	0.235368	0.996	0.994	0.002	2.228e-30	4_preHC
Ptp4a1	9.95261e-35	0.507742	0.975	0.865	0.11	2.24083e-30	4_preHC
Car3	1.0845e-34	-1.25992	0.041	0.243	-0.202	2.44175e-30	4_preHC
Grb10	1.19169e-34	0.297905	0.99	0.874	0.116	2.6831e-30	4_preHC
Pappa	1.3276e-34	-0.799353	0.1	0.31	-0.21	2.98909e-30	4_preHC
Ier5	1.40814e-34	-0.763432	0.797	0.808	-0.011	3.17042e-30	4_preHC
Rbm25	1.59092e-34	-0.383049	0.928	0.898	0.03	3.58196e-30	4_preHC
Gsn	1.59613e-34	-1.03958	0.726	0.719	0.007	3.59368e-30	4_preHC
Pgm3	1.72628e-34	0.25508	0.874	0.56	0.314	3.88671e-30	4_preHC
Hsp90ab1	2.12398e-34	-0.307017	0.997	0.998	-0.001	4.78215e-30	4_preHC
Cdo1	2.56862e-34	-0.518935	0.118	0.327	-0.209	5.78325e-30	4_preHC
Tmed1	2.77847e-34	0.260801	0.953	0.751	0.202	6.25573e-30	4_preHC
Svil	2.90598e-34	-0.344703	0.066	0.276	-0.21	6.54282e-30	4_preHC
Foxp1	3.1915e-34	-0.610857	0.221	0.419	-0.198	7.18565e-30	4_preHC
Grhpr	3.46135e-34	0.217807	0.776	0.454	0.322	7.79323e-30	4_preHC
Irf2bp2	3.50396e-34	-0.471163	0.536	0.627	-0.091	7.88916e-30	4_preHC
Rpl13a	3.89113e-34	0.27862	0.986	0.936	0.05	8.76088e-30	4_preHC
Timm10b	4.15547e-34	0.279706	0.951	0.777	0.174	9.35603e-30	4_preHC
Jmjd1c	5.21857e-34	-0.492329	0.795	0.8	-0.005	1.17496e-29	4_preHC
Mphosph6	8.17984e-34	0.241119	0.829	0.53	0.299	1.84169e-29	4_preHC
Srp9	8.2103e-34	0.236355	0.99	0.951	0.039	1.84855e-29	4_preHC
Gpi1	8.5742e-34	0.258057	0.963	0.798	0.165	1.93048e-29	4_preHC
Myh9	1.01284e-33	-0.607869	0.513	0.615	-0.102	2.28041e-29	4_preHC
Tnfrsf19	1.25385e-33	-0.388379	0.028	0.222	-0.194	2.82303e-29	4_preHC
Rnf7	1.27653e-33	0.294968	0.951	0.748	0.203	2.8741e-29	4_preHC
Lox	1.38544e-33	-1.4981	0.257	0.43	-0.173	3.11931e-29	4_preHC
Ndufs5	1.39464e-33	0.250044	0.98	0.899	0.081	3.14004e-29	4_preHC
Plxdc2	1.46933e-33	-0.734546	0.217	0.415	-0.198	3.30819e-29	4_preHC
Vstm4	1.71968e-33	-0.339976	0.021	0.212	-0.191	3.87185e-29	4_preHC
Mrpl54	1.72585e-33	0.279644	0.963	0.798	0.165	3.88576e-29	4_preHC
Csrp2	1.79611e-33	-0.573861	0.295	0.468	-0.173	4.04394e-29	4_preHC
Ifngr2	2.07362e-33	-0.382988	0.116	0.322	-0.206	4.66875e-29	4_preHC
Nono	2.13314e-33	-0.424327	0.781	0.758	0.023	4.80277e-29	4_preHC
Twsg1	2.32683e-33	0.247622	0.839	0.539	0.3	5.23887e-29	4_preHC
Ltbp1	2.42961e-33	-0.331292	0.03	0.222	-0.192	5.47026e-29	4_preHC
Adamts1	2.63414e-33	-0.798438	0.386	0.562	-0.176	5.93077e-29	4_preHC
Tmem167	3.23556e-33	0.257002	0.984	0.934	0.05	7.28486e-29	4_preHC
Hpgd	3.51403e-33	-0.806194	0.164	0.364	-0.2	7.91185e-29	4_preHC
Klhl21	3.67181e-33	0.209469	0.736	0.439	0.297	8.26707e-29	4_preHC
Snhg18	3.77988e-33	0.304906	0.984	0.854	0.13	8.51041e-29	4_preHC
Pcf11	4.46264e-33	-0.503028	0.512	0.611	-0.099	1.00476e-28	4_preHC
Srebf1	4.85225e-33	0.240409	0.673	0.37	0.303	1.09248e-28	4_preHC
Epdr1	5.10093e-33	-0.534771	0.265	0.439	-0.174	1.14848e-28	4_preHC
Lnpep	5.58948e-33	0.244432	0.869	0.565	0.304	1.25847e-28	4_preHC
Ptpn13	5.80397e-33	-0.379438	0.089	0.292	-0.203	1.30676e-28	4_preHC
Mustn1	5.89319e-33	0.479042	0.292	0.109	0.183	1.32685e-28	4_preHC
Timm8b	6.71875e-33	0.273283	0.946	0.748	0.198	1.51273e-28	4_preHC
Klhl24	7.35593e-33	-0.497909	0.377	0.519	-0.142	1.65619e-28	4_preHC
Prorsd1	8.16915e-33	0.21099	0.777	0.454	0.323	1.83928e-28	4_preHC
Ggt5	8.31365e-33	-0.489585	0.021	0.208	-0.187	1.87182e-28	4_preHC
Slc38a4	9.17987e-33	0.228963	0.763	0.45	0.313	2.06685e-28	4_preHC
Uqcrq	9.27908e-33	0.250458	0.983	0.932	0.051	2.08918e-28	4_preHC
Gars	1.10027e-32	0.257343	0.939	0.688	0.251	2.47727e-28	4_preHC
Ccdc47	1.53713e-32	0.235974	0.889	0.581	0.308	3.46084e-28	4_preHC
Pbx1	1.76582e-32	-0.506666	0.254	0.439	-0.185	3.97573e-28	4_preHC
Aplp2	2.03686e-32	-0.449946	0.935	0.907	0.028	4.586e-28	4_preHC
Rps11	2.57222e-32	0.202705	1	0.998	0.002	5.79136e-28	4_preHC
Efnb1	2.63363e-32	-0.560134	0.426	0.549	-0.123	5.92963e-28	4_preHC
Itm2b	2.77637e-32	-0.793374	0.982	0.981	0.001	6.25099e-28	4_preHC
Mest	3.61148e-32	-1.09797	0.542	0.671	-0.129	8.13125e-28	4_preHC
Mfge8	4.3229e-32	0.377677	0.98	0.846	0.134	9.73301e-28	4_preHC
Map1lc3a	6.34567e-32	-0.514608	0.746	0.756	-0.01	1.42873e-27	4_preHC
Fbxl7	7.0524e-32	-0.355563	0.047	0.238	-0.191	1.58785e-27	4_preHC
Srpr	7.61214e-32	0.269506	0.968	0.781	0.187	1.71387e-27	4_preHC
Edf1	8.5717e-32	0.275052	0.962	0.844	0.118	1.92992e-27	4_preHC
Trp53	9.71205e-32	-0.417455	0.382	0.519	-0.137	2.18667e-27	4_preHC
Snai1	9.86853e-32	0.245602	0.628	0.351	0.277	2.2219e-27	4_preHC
Eid1	1.11231e-31	0.281622	0.983	0.915	0.068	2.50436e-27	4_preHC
Notch3	1.36376e-31	-0.50468	0.031	0.216	-0.185	3.0705e-27	4_preHC
Mrpl57	1.62562e-31	0.278946	0.935	0.711	0.224	3.66008e-27	4_preHC
Hif1a	1.64396e-31	0.231523	0.972	0.818	0.154	3.70137e-27	4_preHC
Hp	1.68648e-31	-1.16368	0.062	0.255	-0.193	3.7971e-27	4_preHC
Dbn1	1.83535e-31	-0.287901	0.041	0.23	-0.189	4.1323e-27	4_preHC
Sec13	1.8555e-31	0.269136	0.956	0.806	0.15	4.17765e-27	4_preHC
Litaf	1.86266e-31	-0.434784	0.375	0.521	-0.146	4.19378e-27	4_preHC
Atrx	2.17432e-31	-0.42672	0.838	0.829	0.009	4.89548e-27	4_preHC
Tacc1	2.23145e-31	0.285521	0.884	0.626	0.258	5.02411e-27	4_preHC
Rtcb	2.47657e-31	0.241557	0.891	0.646	0.245	5.57601e-27	4_preHC
Thbs3	2.90038e-31	0.227761	0.965	0.611	0.354	6.53019e-27	4_preHC
Mtch1	3.15718e-31	-0.44227	0.938	0.895	0.043	7.10838e-27	4_preHC
Runx1	3.25925e-31	-0.706674	0.801	0.803	-0.002	7.33821e-27	4_preHC
Selenot	3.31632e-31	0.223003	0.862	0.575	0.287	7.46669e-27	4_preHC
Manf	3.41885e-31	0.244002	0.984	0.909	0.075	7.69755e-27	4_preHC
Ptpn1	3.44299e-31	-0.492959	0.551	0.62	-0.069	7.75189e-27	4_preHC
Rgs2	5.86371e-31	-0.477051	0.093	0.288	-0.195	1.32021e-26	4_preHC
Tmf1	8.3002e-31	0.223608	0.865	0.563	0.302	1.86879e-26	4_preHC
Npm1	8.48229e-31	0.275565	0.999	0.995	0.004	1.90979e-26	4_preHC
Bcl7c	1.03282e-30	-0.408473	0.732	0.737	-0.005	2.32539e-26	4_preHC
Selenop	1.07726e-30	-0.593949	0.128	0.321	-0.193	2.42544e-26	4_preHC
Hmgcs1	1.30052e-30	0.343426	0.948	0.722	0.226	2.92813e-26	4_preHC
Col22a1	1.30363e-30	-0.944265	0.054	0.24	-0.186	2.93513e-26	4_preHC
Hes1	1.42496e-30	0.415212	0.87	0.666	0.204	3.2083e-26	4_preHC
Spata13	1.44261e-30	-0.296229	0.092	0.287	-0.195	3.24803e-26	4_preHC
Rps15a	1.51873e-30	0.252212	0.997	0.999	-0.002	3.41942e-26	4_preHC
Cep85l	1.83074e-30	0.234495	0.382	0.171	0.211	4.12192e-26	4_preHC
Nme1	2.04027e-30	0.286676	0.982	0.931	0.051	4.59366e-26	4_preHC
Tomm7	2.12666e-30	0.249169	0.979	0.86	0.119	4.78818e-26	4_preHC
Mydgf	2.36793e-30	0.270811	0.982	0.89	0.092	5.3314e-26	4_preHC
Tiam2	3.39045e-30	0.271092	0.886	0.625	0.261	7.6336e-26	4_preHC
Mxd4	3.50281e-30	-0.599779	0.811	0.769	0.042	7.88658e-26	4_preHC
Ecm1	3.62098e-30	-0.408297	0.048	0.233	-0.185	8.15264e-26	4_preHC
Atp6v0b	3.68717e-30	0.252614	0.952	0.773	0.179	8.30166e-26	4_preHC
Pgp	3.82735e-30	0.208346	0.755	0.445	0.31	8.61727e-26	4_preHC
Gde1	4.72626e-30	0.251554	0.891	0.639	0.252	1.06412e-25	4_preHC
Actb	5.23324e-30	-0.543529	1	1	0	1.17826e-25	4_preHC
Nsd3	5.29378e-30	-0.488244	0.532	0.606	-0.074	1.19189e-25	4_preHC
Tubb6	5.29504e-30	-0.509012	0.546	0.645	-0.099	1.19218e-25	4_preHC
Hist1h1c	5.66788e-30	0.433321	0.822	0.586	0.236	1.27612e-25	4_preHC
Mylk	5.73479e-30	-0.487318	0.061	0.246	-0.185	1.29119e-25	4_preHC
Tcp1	6.31419e-30	0.266436	0.977	0.871	0.106	1.42164e-25	4_preHC
Serf2	8.8647e-30	0.213046	0.996	0.995	0.001	1.99589e-25	4_preHC
Hnrnpl	9.90676e-30	-0.386059	0.666	0.686	-0.02	2.23051e-25	4_preHC
1110065P20Rik	1.47197e-29	0.24952	0.901	0.695	0.206	3.31413e-25	4_preHC
Nradd	1.58395e-29	-0.310024	0.063	0.248	-0.185	3.56626e-25	4_preHC
Rai14	1.60573e-29	-0.563567	0.227	0.397	-0.17	3.61529e-25	4_preHC
Uso1	1.70567e-29	0.236638	0.931	0.688	0.243	3.84032e-25	4_preHC
Rpl39l	1.737e-29	-0.510986	0.154	0.362	-0.208	3.91085e-25	4_preHC
Clk1	1.74494e-29	-0.448332	0.807	0.805	0.002	3.92872e-25	4_preHC
Hist4h4	1.92721e-29	0.217502	0.223	0.072	0.151	4.33912e-25	4_preHC
Tns3	2.35344e-29	-0.583042	0.43	0.549	-0.119	5.29878e-25	4_preHC
Ccdc88a	2.62652e-29	0.305583	0.927	0.747	0.18	5.9136e-25	4_preHC
Col4a2	3.07892e-29	-0.738952	0.121	0.307	-0.186	6.9322e-25	4_preHC
Nfe2l1	3.66012e-29	0.245246	0.948	0.671	0.277	8.24075e-25	4_preHC
Taf10	4.39174e-29	0.251848	0.959	0.798	0.161	9.88799e-25	4_preHC
Tsc22d2	4.4406e-29	-0.469844	0.364	0.504	-0.14	9.998e-25	4_preHC
Ebf1	4.51323e-29	-1.07391	0.681	0.685	-0.004	1.01615e-24	4_preHC
Zbtb7a	4.68422e-29	-0.436029	0.291	0.459	-0.168	1.05465e-24	4_preHC
Adgrl1	4.74728e-29	-0.357264	0.193	0.371	-0.178	1.06885e-24	4_preHC
Bola2	4.78566e-29	0.220502	0.901	0.638	0.263	1.07749e-24	4_preHC
Gaa	6.96412e-29	0.236004	0.928	0.674	0.254	1.56797e-24	4_preHC
Hcfc1r1	7.31717e-29	0.239509	0.894	0.64	0.254	1.64746e-24	4_preHC
Nbl1	7.69179e-29	-0.389518	0.075	0.257	-0.182	1.73181e-24	4_preHC
Rpl10	7.82074e-29	0.217832	0.997	0.998	-0.001	1.76084e-24	4_preHC
Park7	7.92754e-29	0.249964	0.983	0.916	0.067	1.78488e-24	4_preHC
Asap1	8.57481e-29	-0.412402	0.388	0.516	-0.128	1.93062e-24	4_preHC
Irf2bpl	8.78656e-29	-0.395274	0.255	0.428	-0.173	1.97829e-24	4_preHC
Casc4	9.84962e-29	0.205022	0.922	0.626	0.296	2.21764e-24	4_preHC
Kdelr2	9.85291e-29	0.219206	0.997	0.963	0.034	2.21838e-24	4_preHC
Dchs1	1.09303e-28	-0.230498	0.03	0.201	-0.171	2.46096e-24	4_preHC
Tbrg1	1.18388e-28	0.247802	0.982	0.876	0.106	2.66551e-24	4_preHC
Pofut2	1.33983e-28	0.237735	0.99	0.874	0.116	3.01663e-24	4_preHC
Rpl36	1.42919e-28	0.214148	0.999	0.997	0.002	3.21783e-24	4_preHC
Elmo1	1.5372e-28	-0.32106	0.082	0.265	-0.183	3.46101e-24	4_preHC
Sh3glb1	1.97599e-28	0.239794	0.979	0.913	0.066	4.44894e-24	4_preHC
Eif2s2	2.49572e-28	0.227069	0.992	0.97	0.022	5.61911e-24	4_preHC
Sar1b	2.74276e-28	0.216472	0.921	0.687	0.234	6.17531e-24	4_preHC
4930523C07Rik	2.79693e-28	0.248434	0.769	0.491	0.278	6.29729e-24	4_preHC
Man2a1	2.90712e-28	-0.433136	0.118	0.301	-0.183	6.54539e-24	4_preHC
2011-09-01	3.87266e-28	-0.633793	0.708	0.708	0	8.71929e-24	4_preHC
Psma3	4.65036e-28	0.257239	0.989	0.944	0.045	1.04703e-23	4_preHC
Ifngr1	5.1034e-28	-0.413837	0.298	0.444	-0.146	1.14903e-23	4_preHC
Rpl36a	6.82647e-28	0.216175	0.996	0.996	0	1.53698e-23	4_preHC
Prrc1	7.15539e-28	0.227325	0.956	0.708	0.248	1.61104e-23	4_preHC
Ebna1bp2	9.47202e-28	0.218273	0.907	0.648	0.259	2.13263e-23	4_preHC
Amotl1	1.15481e-27	-0.469975	0.777	0.759	0.018	2.60005e-23	4_preHC
Tram1	1.18644e-27	0.224422	0.972	0.798	0.174	2.67128e-23	4_preHC
Mapre1	1.18911e-27	-0.363967	0.91	0.879	0.031	2.67728e-23	4_preHC
Dnajc25	1.48956e-27	0.232746	0.866	0.602	0.264	3.35374e-23	4_preHC
Yipf4	1.53609e-27	0.22657	0.953	0.735	0.218	3.45851e-23	4_preHC
Dennd5b	1.62695e-27	-0.314806	0.076	0.255	-0.179	3.66307e-23	4_preHC
Rbx1	1.74583e-27	0.217264	0.984	0.922	0.062	3.93075e-23	4_preHC
Ccdc12	1.75303e-27	-0.509818	0.553	0.608	-0.055	3.94695e-23	4_preHC
Bmp2	2.27485e-27	0.371031	0.571	0.327	0.244	5.12182e-23	4_preHC
2004-09-01	2.57942e-27	-0.346219	0.086	0.262	-0.176	5.80756e-23	4_preHC
Atp1b3	2.94212e-27	0.440309	0.934	0.735	0.199	6.62418e-23	4_preHC
Smarce1	3.10366e-27	-0.362305	0.732	0.714	0.018	6.9879e-23	4_preHC
Camk2n1	3.87072e-27	-0.307144	0.09	0.27	-0.18	8.71493e-23	4_preHC
Hpcal1	4.04743e-27	-0.230773	0.069	0.244	-0.175	9.1128e-23	4_preHC
Eef1g	4.16936e-27	0.232795	0.996	0.988	0.008	9.3873e-23	4_preHC
Akt1	4.37331e-27	-0.354203	0.85	0.834	0.016	9.84651e-23	4_preHC
Yif1b	5.15242e-27	0.220895	0.942	0.748	0.194	1.16007e-22	4_preHC
Kcnk1	6.99064e-27	-0.293996	0.069	0.247	-0.178	1.57394e-22	4_preHC
P3h4	7.22621e-27	0.263983	0.983	0.839	0.144	1.62698e-22	4_preHC
Phip	7.55752e-27	-0.497676	0.378	0.505	-0.127	1.70158e-22	4_preHC
Rpl23	7.59318e-27	0.208909	1	0.999	0.001	1.70961e-22	4_preHC
Derl1	7.93993e-27	0.204777	0.934	0.701	0.233	1.78768e-22	4_preHC
D830025C05Rik	8.21928e-27	-0.354935	0.142	0.326	-0.184	1.85057e-22	4_preHC
Myd88	9.60044e-27	-0.319136	0.107	0.285	-0.178	2.16154e-22	4_preHC
Phlda3	1.11625e-26	-0.319189	0.096	0.275	-0.179	2.51325e-22	4_preHC
Vezf1	1.27484e-26	-0.381468	0.471	0.564	-0.093	2.8703e-22	4_preHC
Ywhaz	1.31032e-26	-0.373783	0.915	0.896	0.019	2.95018e-22	4_preHC
Angpt1	1.33292e-26	-0.362169	0.047	0.213	-0.166	3.00107e-22	4_preHC
Bicc1	1.50828e-26	-0.698241	0.601	0.626	-0.025	3.39589e-22	4_preHC
Pdk4	2.38064e-26	-0.327492	0.045	0.209	-0.164	5.36001e-22	4_preHC
Hexa	2.56516e-26	-0.35936	0.773	0.753	0.02	5.77546e-22	4_preHC
Ppp1r15a	2.68554e-26	-0.524088	0.757	0.762	-0.005	6.04649e-22	4_preHC
Kirrel	3.18421e-26	-0.394547	0.269	0.425	-0.156	7.16924e-22	4_preHC
Nasp	3.19084e-26	-0.513746	0.611	0.645	-0.034	7.18417e-22	4_preHC
Bmp2k	3.43803e-26	-0.412996	0.205	0.366	-0.161	7.74072e-22	4_preHC
Baz1a	3.47812e-26	-0.341388	0.172	0.347	-0.175	7.831e-22	4_preHC
Emp1	3.74876e-26	-0.625534	0.874	0.868	0.006	8.44033e-22	4_preHC
Casp3	4.23731e-26	-0.327497	0.25	0.414	-0.164	9.5403e-22	4_preHC
0610012G03Rik	4.97326e-26	0.225089	0.941	0.737	0.204	1.11973e-21	4_preHC
Nfix	4.99602e-26	-0.400896	0.882	0.828	0.054	1.12485e-21	4_preHC
Alpl	5.40034e-26	-1.45913	0.529	0.583	-0.054	1.21589e-21	4_preHC
Tcn2	6.50577e-26	-0.38964	0.264	0.417	-0.153	1.46477e-21	4_preHC
Srprb	6.71462e-26	0.211325	0.834	0.537	0.297	1.5118e-21	4_preHC
Zfp651	6.77987e-26	-0.334685	0.175	0.342	-0.167	1.52649e-21	4_preHC
Crip1	7.64942e-26	-0.628999	0.756	0.806	-0.05	1.72227e-21	4_preHC
Ift20	8.02523e-26	0.236755	0.969	0.876	0.093	1.80688e-21	4_preHC
Eif3b	8.73969e-26	0.249484	0.928	0.738	0.19	1.96774e-21	4_preHC
Prrc2c	9.02112e-26	-0.425652	0.879	0.842	0.037	2.0311e-21	4_preHC
Lepr	1.05562e-25	-0.647068	0.049	0.211	-0.162	2.37672e-21	4_preHC
Fmnl3	1.11034e-25	-0.268676	0.086	0.256	-0.17	2.49994e-21	4_preHC
Rab1a	1.26399e-25	0.221378	0.968	0.838	0.13	2.84588e-21	4_preHC
Fuca1	1.30796e-25	-0.357753	0.711	0.706	0.005	2.94488e-21	4_preHC
Slc29a1	2.321e-25	-0.771227	0.756	0.718	0.038	5.22574e-21	4_preHC
Notch1	3.73648e-25	-0.367291	0.176	0.345	-0.169	8.41269e-21	4_preHC
Rpl39	4.0623e-25	0.21882	0.997	0.997	0	9.14628e-21	4_preHC
Nxf1	4.23746e-25	-0.367712	0.773	0.777	-0.004	9.54063e-21	4_preHC
Gnb2	4.51474e-25	-0.382354	0.984	0.951	0.033	1.01649e-20	4_preHC
Zfand5	5.89835e-25	-0.480379	0.935	0.912	0.023	1.32801e-20	4_preHC
Mex3a	6.52647e-25	-0.271295	0.056	0.218	-0.162	1.46944e-20	4_preHC
Tmem258	6.65528e-25	0.248907	0.973	0.907	0.066	1.49844e-20	4_preHC
Pla2g4a	6.83204e-25	-0.32087	0.104	0.269	-0.165	1.53823e-20	4_preHC
Fhl2	7.04348e-25	-0.744966	0.307	0.451	-0.144	1.58584e-20	4_preHC
Rock2	7.10747e-25	-0.44231	0.911	0.869	0.042	1.60025e-20	4_preHC
Arid4b	7.30766e-25	-0.432105	0.69	0.702	-0.012	1.64532e-20	4_preHC
Sparc	9.68292e-25	-1.18992	1	1	0	2.18011e-20	4_preHC
Stt3a	1.0299e-24	0.215848	0.986	0.863	0.123	2.31883e-20	4_preHC
Mrpl30	1.0887e-24	0.213069	0.962	0.798	0.164	2.45122e-20	4_preHC
mt-Nd4l	1.33029e-24	-0.420717	0.962	0.931	0.031	2.99515e-20	4_preHC
Palld	1.49458e-24	-0.64691	0.382	0.49	-0.108	3.36504e-20	4_preHC
Pfn1	1.71665e-24	-0.417572	0.984	0.958	0.026	3.86505e-20	4_preHC
Egr3	1.78614e-24	-0.248704	0.048	0.209	-0.161	4.02149e-20	4_preHC
Hnrnpdl	1.91412e-24	-0.399082	0.935	0.898	0.037	4.30964e-20	4_preHC
Ndufab1	2.09131e-24	0.235643	0.973	0.856	0.117	4.70859e-20	4_preHC
Tmod3	2.16224e-24	-0.563916	0.451	0.533	-0.082	4.86829e-20	4_preHC
St3gal6	2.35747e-24	-0.533605	0.465	0.549	-0.084	5.30784e-20	4_preHC
Hmgb2	2.35994e-24	-1.13675	0.928	0.861	0.067	5.3134e-20	4_preHC
Flrt2	2.37702e-24	-0.303484	0.137	0.309	-0.172	5.35186e-20	4_preHC
Clic4	2.49475e-24	0.213481	0.979	0.84	0.139	5.61694e-20	4_preHC
Tsc22d4	2.5757e-24	0.212053	0.797	0.527	0.27	5.7992e-20	4_preHC
Npc2	2.99304e-24	-0.353086	0.973	0.944	0.029	6.73884e-20	4_preHC
Wbp1	3.21447e-24	-0.237025	0.066	0.227	-0.161	7.23739e-20	4_preHC
Gng11	3.50588e-24	-0.616715	0.619	0.668	-0.049	7.89349e-20	4_preHC
Vdac1	3.63598e-24	0.266796	0.972	0.821	0.151	8.18641e-20	4_preHC
Col12a1	4.29743e-24	-1.38909	0.79	0.775	0.015	9.67566e-20	4_preHC
Bok	4.37351e-24	-0.365493	0.092	0.254	-0.162	9.84695e-20	4_preHC
Pdcd6ip	4.61166e-24	0.222039	0.9	0.662	0.238	1.03832e-19	4_preHC
Stat3	4.74532e-24	-0.399116	0.865	0.841	0.024	1.06841e-19	4_preHC
Lpp	4.76763e-24	-0.487468	0.647	0.686	-0.039	1.07343e-19	4_preHC
Nfkb1	5.3651e-24	-0.599075	0.539	0.585	-0.046	1.20795e-19	4_preHC
Apoe	6.9846e-24	-0.969404	0.223	0.377	-0.154	1.57258e-19	4_preHC
Epas1	7.69096e-24	-0.640595	0.135	0.294	-0.159	1.73162e-19	4_preHC
Mlec	8.44254e-24	0.226003	0.965	0.756	0.209	1.90084e-19	4_preHC
Tnfrsf1a	1.06884e-23	-0.371781	0.478	0.556	-0.078	2.40648e-19	4_preHC
Fzd5	1.15315e-23	-0.23252	0.062	0.219	-0.157	2.59633e-19	4_preHC
Col4a1	1.25542e-23	-1.09819	0.114	0.277	-0.163	2.82659e-19	4_preHC
Mat2a	1.79729e-23	-0.399624	0.8	0.791	0.009	4.04661e-19	4_preHC
Sh3bp1	1.90703e-23	-0.237606	0.094	0.26	-0.166	4.29369e-19	4_preHC
Itpr1	2.03213e-23	-0.341213	0.186	0.343	-0.157	4.57534e-19	4_preHC
Malat1	2.1659e-23	-0.481442	1	0.999	0.001	4.87652e-19	4_preHC
Txnrd1	2.25969e-23	-0.395492	0.509	0.579	-0.07	5.08768e-19	4_preHC
Ccnd2	2.2837e-23	-0.422294	0.714	0.768	-0.054	5.14175e-19	4_preHC
Rbfox2	2.33744e-23	-0.34328	0.588	0.622	-0.034	5.26275e-19	4_preHC
Ssh2	2.85246e-23	-0.258097	0.063	0.218	-0.155	6.42231e-19	4_preHC
Xbp1	2.95067e-23	0.200475	0.897	0.631	0.266	6.64343e-19	4_preHC
Ggh	3.24889e-23	-0.369711	0.44	0.54	-0.1	7.31487e-19	4_preHC
Ube2m	3.71596e-23	0.205872	0.968	0.839	0.129	8.36649e-19	4_preHC
Iqgap1	4.03527e-23	0.234296	0.97	0.811	0.159	9.08541e-19	4_preHC
Rps19	4.93365e-23	0.208061	0.999	0.998	0.001	1.11081e-18	4_preHC
Tbc1d2b	5.38776e-23	-0.253192	0.058	0.209	-0.151	1.21305e-18	4_preHC
Sulf1	5.83266e-23	-0.486276	0.096	0.253	-0.157	1.31322e-18	4_preHC
4833422C13Rik	6.3308e-23	-0.279505	0.059	0.212	-0.153	1.42538e-18	4_preHC
Tspan7	6.55193e-23	-0.349895	0.169	0.325	-0.156	1.47517e-18	4_preHC
Tmem50a	6.95344e-23	-0.346633	0.821	0.785	0.036	1.56557e-18	4_preHC
Colec12	9.02651e-23	-0.440338	0.92	0.872	0.048	2.03232e-18	4_preHC
Luc7l3	9.47153e-23	-0.404179	0.533	0.586	-0.053	2.13252e-18	4_preHC
Ndufc1	1.01584e-22	0.215537	0.973	0.878	0.095	2.28717e-18	4_preHC
Tln2	1.56514e-22	-0.528947	0.279	0.414	-0.135	3.52391e-18	4_preHC
Top2a	1.72105e-22	-0.717447	0.111	0.267	-0.156	3.87494e-18	4_preHC
Gjc1	1.91387e-22	-0.275576	0.116	0.272	-0.156	4.30908e-18	4_preHC
Slc39a1	2.31195e-22	-0.397721	0.588	0.625	-0.037	5.20537e-18	4_preHC
Spc24	2.40014e-22	-0.382345	0.102	0.259	-0.157	5.40391e-18	4_preHC
Uhrf2	2.42369e-22	-0.417326	0.327	0.45	-0.123	5.45694e-18	4_preHC
Pdlim4	2.77452e-22	-0.269734	0.106	0.263	-0.157	6.24683e-18	4_preHC
H1fx	2.92392e-22	-0.450888	0.248	0.409	-0.161	6.58321e-18	4_preHC
Tle2	3.41686e-22	-0.386337	0.114	0.267	-0.153	7.69306e-18	4_preHC
Ube2r2	4.01516e-22	-0.36883	0.663	0.658	0.005	9.04013e-18	4_preHC
Rnaseh2c	4.90064e-22	-0.43511	0.549	0.577	-0.028	1.10338e-17	4_preHC
Nrip1	5.06906e-22	-0.415013	0.375	0.484	-0.109	1.1413e-17	4_preHC
Hbb-bs	5.64102e-22	0.473469	0.983	0.965	0.018	1.27008e-17	4_preHC
Lamp1	6.01309e-22	-0.372054	0.99	0.95	0.04	1.35385e-17	4_preHC
Gamt	7.32832e-22	-0.349951	0.179	0.325	-0.146	1.64997e-17	4_preHC
Pkd2	8.36656e-22	-0.398137	0.426	0.521	-0.095	1.88373e-17	4_preHC
Ly6e	8.56652e-22	-0.267526	0.104	0.261	-0.157	1.92875e-17	4_preHC
Bhlhe40	9.63754e-22	0.207834	0.896	0.687	0.209	2.16989e-17	4_preHC
Usmg5	1.05513e-21	0.2182	0.966	0.865	0.101	2.37563e-17	4_preHC
Tkt	1.13942e-21	0.204413	0.986	0.868	0.118	2.5654e-17	4_preHC
Slc25a5	1.20248e-21	-0.45678	0.973	0.926	0.047	2.70737e-17	4_preHC
Jund	1.53234e-21	-0.392531	0.989	0.973	0.016	3.45005e-17	4_preHC
2700038G22Rik	1.54609e-21	0.257277	0.403	0.217	0.186	3.48103e-17	4_preHC
Tmsb10	1.58203e-21	-0.811925	0.984	0.956	0.028	3.56195e-17	4_preHC
Basp1	1.58872e-21	-0.759168	0.264	0.39	-0.126	3.57701e-17	4_preHC
Rps26	1.64315e-21	0.226248	0.999	0.997	0.002	3.69956e-17	4_preHC
Tnrc6a	1.76212e-21	-0.333386	0.502	0.572	-0.07	3.96742e-17	4_preHC
Lsm12	1.83975e-21	0.202397	0.918	0.705	0.213	4.14221e-17	4_preHC
Ube2e3	2.03327e-21	-0.364328	0.777	0.716	0.061	4.5779e-17	4_preHC
Snrpb	2.10294e-21	-0.294132	0.977	0.927	0.05	4.73477e-17	4_preHC
Mgp	2.15691e-21	-0.45005	0.976	0.773	0.203	4.85628e-17	4_preHC
Arrdc4	2.25147e-21	-0.402806	0.175	0.322	-0.147	5.06919e-17	4_preHC
Usp9x	3.05855e-21	-0.352401	0.728	0.717	0.011	6.88633e-17	4_preHC
Pclaf	3.09035e-21	-0.600406	0.058	0.201	-0.143	6.95792e-17	4_preHC
Fosb	3.20565e-21	-0.43431	0.87	0.945	-0.075	7.21753e-17	4_preHC
Psme1	3.88851e-21	-0.388212	0.337	0.443	-0.106	8.75499e-17	4_preHC
Psme2	3.94483e-21	-0.374289	0.518	0.566	-0.048	8.88179e-17	4_preHC
Ssbp3	4.27173e-21	-0.302987	0.33	0.45	-0.12	9.6178e-17	4_preHC
Smc1a	4.29549e-21	-0.409017	0.642	0.643	-0.001	9.67129e-17	4_preHC
Ifitm5	6.07933e-21	-1.18126	0.073	0.216	-0.143	1.36876e-16	4_preHC
Wnk1	6.69593e-21	-0.395914	0.898	0.839	0.059	1.50759e-16	4_preHC
Bach1	7.75046e-21	-0.401628	0.441	0.531	-0.09	1.74502e-16	4_preHC
Nr2f6	8.32196e-21	-0.355816	0.377	0.468	-0.091	1.87369e-16	4_preHC
Ccar1	8.39386e-21	-0.332915	0.663	0.67	-0.007	1.88988e-16	4_preHC
Prkcsh	9.35869e-21	0.213703	0.98	0.84	0.14	2.10711e-16	4_preHC
Ece1	9.84077e-21	-0.313305	0.104	0.251	-0.147	2.21565e-16	4_preHC
Cst3	1.19472e-20	-0.440946	0.996	0.989	0.007	2.6899e-16	4_preHC
Agbl3	1.33267e-20	-0.402962	0.138	0.287	-0.149	3.0005e-16	4_preHC
Hmgb3	1.64249e-20	-0.310693	0.258	0.394	-0.136	3.69807e-16	4_preHC
1190002N15Rik	1.73035e-20	-0.389915	0.556	0.599	-0.043	3.89589e-16	4_preHC
Atp11a	1.7306e-20	-0.296415	0.145	0.293	-0.148	3.89645e-16	4_preHC
Peli1	1.75766e-20	-0.424479	0.536	0.588	-0.052	3.95738e-16	4_preHC
Tnnt3	2.02487e-20	0.208423	0.396	0.207	0.189	4.55899e-16	4_preHC
Ctnnb1	2.3018e-20	-0.290952	0.996	0.99	0.006	5.1825e-16	4_preHC
Sfpq	2.57222e-20	-0.323358	0.984	0.951	0.033	5.79136e-16	4_preHC
Ccng2	2.79025e-20	-0.226528	0.073	0.217	-0.144	6.28225e-16	4_preHC
Psmd7	2.84965e-20	0.212742	0.969	0.831	0.138	6.41599e-16	4_preHC
Rnase4	2.92426e-20	-0.330467	0.15	0.291	-0.141	6.58397e-16	4_preHC
Ergic3	3.14746e-20	-0.283178	0.927	0.87	0.057	7.08651e-16	4_preHC
Boc	3.21137e-20	-0.272251	0.133	0.282	-0.149	7.2304e-16	4_preHC
Ubn1	4.3062e-20	-0.342513	0.666	0.652	0.014	9.69541e-16	4_preHC
Hmgn2	4.43028e-20	-0.498639	0.819	0.734	0.085	9.97477e-16	4_preHC
Rab11b	4.80548e-20	-0.347053	0.626	0.633	-0.007	1.08195e-15	4_preHC
Bri3	5.65879e-20	-0.316043	0.879	0.815	0.064	1.27408e-15	4_preHC
Kdm6b	5.78146e-20	-0.511252	0.8	0.791	0.009	1.3017e-15	4_preHC
AC160336.1	5.7991e-20	0.243234	0.453	0.261	0.192	1.30567e-15	4_preHC
Fam104a	6.74248e-20	0.201217	0.965	0.835	0.13	1.51807e-15	4_preHC
Rtf1	7.33548e-20	-0.324065	0.681	0.672	0.009	1.65158e-15	4_preHC
Tcirg1	7.75696e-20	-0.245928	0.093	0.235	-0.142	1.74648e-15	4_preHC
Gpx4	7.8098e-20	-0.344743	0.982	0.959	0.023	1.75838e-15	4_preHC
Snrnp70	7.94054e-20	-0.320323	0.917	0.856	0.061	1.78781e-15	4_preHC
Brd3	8.30426e-20	-0.342752	0.436	0.506	-0.07	1.8697e-15	4_preHC
Vcam1	9.84647e-20	-0.797827	0.12	0.264	-0.144	2.21693e-15	4_preHC
Sema5a	1.085e-19	-0.434257	0.183	0.318	-0.135	2.44287e-15	4_preHC
Dstn	1.16986e-19	-0.370597	0.98	0.964	0.016	2.63394e-15	4_preHC
Dab2ip	1.34371e-19	-0.261284	0.207	0.347	-0.14	3.02537e-15	4_preHC
Camk1	1.67548e-19	0.21377	0.736	0.506	0.23	3.77235e-15	4_preHC
Tpm3	1.77994e-19	-0.32235	0.901	0.856	0.045	4.00753e-15	4_preHC
Cd276	1.88879e-19	-0.351849	0.381	0.477	-0.096	4.25261e-15	4_preHC
Ddx39b	1.91085e-19	-0.296472	0.928	0.877	0.051	4.30227e-15	4_preHC
Prdx6	1.93401e-19	-0.334659	0.817	0.775	0.042	4.35443e-15	4_preHC
Hexim1	1.96288e-19	-0.420809	0.458	0.533	-0.075	4.41943e-15	4_preHC
Ndufv1	2.0627e-19	-0.344806	0.606	0.612	-0.006	4.64418e-15	4_preHC
Ptgs2	2.06805e-19	-0.695474	0.123	0.271	-0.148	4.65622e-15	4_preHC
Birc5	2.61937e-19	-0.705227	0.107	0.246	-0.139	5.89752e-15	4_preHC
Gpx1	2.64686e-19	-0.366612	0.842	0.805	0.037	5.9594e-15	4_preHC
Ptbp1	2.89595e-19	-0.327304	0.92	0.86	0.06	6.52023e-15	4_preHC
Taf1d	2.95553e-19	-0.393082	0.766	0.724	0.042	6.65437e-15	4_preHC
Selenom	3.17943e-19	-0.525121	0.922	0.912	0.01	7.15848e-15	4_preHC
Hnrnpk	3.21387e-19	-0.236346	0.992	0.988	0.004	7.23603e-15	4_preHC
Smc2	3.47386e-19	-0.487955	0.14	0.276	-0.136	7.82139e-15	4_preHC
Pkp4	3.63496e-19	-0.237451	0.152	0.294	-0.142	8.18412e-15	4_preHC
Samd14	3.88083e-19	-0.222554	0.083	0.221	-0.138	8.73768e-15	4_preHC
Lamp2	3.91605e-19	-0.378029	0.915	0.859	0.056	8.81699e-15	4_preHC
Irx3	3.97998e-19	-0.447247	0.19	0.32	-0.13	8.96093e-15	4_preHC
Cks1b	4.27406e-19	-0.501862	0.477	0.517	-0.04	9.62304e-15	4_preHC
Plekhg2	4.43092e-19	-0.289519	0.111	0.249	-0.138	9.97623e-15	4_preHC
Bglap	4.4881e-19	-3.79203	0.214	0.344	-0.13	1.0105e-14	4_preHC
Myl12b	4.66241e-19	-0.401082	0.566	0.599	-0.033	1.04974e-14	4_preHC
Ank	5.46392e-19	-0.390204	0.158	0.297	-0.139	1.2302e-14	4_preHC
Ptch1	5.83705e-19	0.219274	0.867	0.613	0.254	1.31421e-14	4_preHC
Sgk1	6.69478e-19	-0.729403	0.636	0.646	-0.01	1.50733e-14	4_preHC
Ubald2	7.18677e-19	-0.334877	0.439	0.509	-0.07	1.6181e-14	4_preHC
Map4k3	7.26209e-19	-0.35838	0.286	0.4	-0.114	1.63506e-14	4_preHC
Lrrc58	8.41203e-19	-0.336185	0.759	0.74	0.019	1.89397e-14	4_preHC
Slc35e4	8.679e-19	-0.287832	0.245	0.389	-0.144	1.95408e-14	4_preHC
Klf3	8.68937e-19	0.408435	0.769	0.558	0.211	1.95641e-14	4_preHC
Mprip	8.83488e-19	-0.380214	0.808	0.763	0.045	1.98917e-14	4_preHC
Eci2	1.105e-18	-0.31113	0.609	0.613	-0.004	2.48791e-14	4_preHC
Ramp1	1.23097e-18	-0.629011	0.176	0.304	-0.128	2.77153e-14	4_preHC
Tcf12	1.30396e-18	-0.307454	0.57	0.605	-0.035	2.93586e-14	4_preHC
Lars2	1.33689e-18	-0.366477	0.793	0.758	0.035	3.01001e-14	4_preHC
Itgb5	1.34459e-18	-0.423146	0.546	0.574	-0.028	3.02734e-14	4_preHC
[truncated: 619 more rows]

## Sheet: hypertrophic chondrocytes
gene	p_val	avg_log2FC	% in this cluster	% in all other cells	% difference	p_val_adj	cluster
[truncated: 2,153 more rows]

[truncated: 3 more sheets: immature osteoblasts, mature osteoblasts, osteocytes]
