# Supplementary material for: MMP14 cleaves PTH1R in the chondrocyte-derived osteoblast lineage, curbing signaling intensity for proper bone anabolism
Source: eLife. 2023 Mar 9;12:e82142. doi: 10.7554/eLife.82142 (PMC10036123; doi:10.7554/eLife.82142)
Supplement: Figure 1—source data 2. [file elife-82142-fig1-data2.xlsx]

## Sheet: Title and legend
Figure 1—source data 2. Complete list of GO term from gene-ontlogy enrichment analysis of chondro-steogenic cell clusters from the tibia of C10Cre;RtdT postnatal day 6 mice. Genes are ranked in ascending order of p value.

## Sheet: preHC
Gene.Set.Name	Number of Genes in Gene Set (K)	Description	Number of Genes in Overlap (k)	k/K	p.value	FDR (q value)	genes
GOBP_SKELETAL_SYSTEM_DEVELOPMENT	485	The process whose specific outcome is the progression of the skeleton over time, from its formation to the mature structure. The skeleton is the bony framework of the body in vertebrates (endoskeleton) or the hard outer envelope of insects (exoskeleton or dermoskeleton). [GOC:dph, GOC:jid, GOC:tb]	30	0.0619	4.97e-31	3.72e-27	SMPD3, SOX9, COMP, MATN1, COL27A1, LOXL2, CHADL, CSGALNACT1, CCN1, COL11A2, MATN3, CHST11, FGFR3, PTH1R, SOX5, SCIN, TRPS1, CNMD, THBS3, MGP, EPYC, SNORC, ACAN, HAPLN1, COL9A2, XYLT1, PAPSS2, PRELP, UCMA, GDF10
GOBP_CARTILAGE_DEVELOPMENT	184	The process whose specific outcome is the progression of a cartilage element over time, from its formation to the mature structure. Cartilage elements are skeletal elements that consist of connective tissue dominated by extracellular matrix containing collagen type II and large amounts of proteoglycan, particularly chondroitin sulfate. [GOC:cjm, PMID:23251424]	22	0.1196	3.1e-29	1.16e-25	SMPD3, SOX9, COMP, MATN1, COL27A1, LOXL2, CHADL, CSGALNACT1, CCN1, COL11A2, MATN3, CHST11, FGFR3, PTH1R, SOX5, SCIN, TRPS1, CNMD, THBS3, MGP, EPYC, SNORC
GOBP_CONNECTIVE_TISSUE_DEVELOPMENT	242	The progression of a connective tissue over time, from its formation to the mature structure. [GOC:BHF]	22	0.0909	1.55e-26	3.87e-23	SMPD3, SOX9, COMP, MATN1, COL27A1, LOXL2, CHADL, CSGALNACT1, CCN1, COL11A2, MATN3, CHST11, FGFR3, PTH1R, SOX5, SCIN, TRPS1, CNMD, THBS3, MGP, EPYC, SNORC
GOBP_EXTERNAL_ENCAPSULATING_STRUCTURE_ORGANIZATION	396	A process that is carried out at the cellular level which results in the assembly, arrangement of constituent parts, or disassembly of external structures that lie outside the plasma membrane and surround the entire cell. [GOC:ai, GOC:dph, GOC:jl, GOC:mah]	22	0.0556	8.14e-22	1.52e-18	SMPD3, SOX9, COMP, MATN1, COL27A1, LOXL2, CHADL, CSGALNACT1, CCN1, COL11A2, MATN3, ACAN, HAPLN1, COL9A2, FMOD, THBS1, SMOC2, NID2, COL9A1, COL9A3, MIA, MATN4
GOBP_CHONDROCYTE_DIFFERENTIATION	102	The process in which a chondroblast acquires specialized structural and/or functional features of a chondrocyte. A chondrocyte is a polymorphic cell that forms cartilage. [GOC:dph]	13	0.1275	4.94e-18	7.39e-15	SMPD3, SOX9, COMP, MATN1, COL27A1, LOXL2, CHADL, CHST11, FGFR3, PTH1R, SOX5, SCIN, TRPS1
GOBP_CARBOHYDRATE_DERIVATIVE_METABOLIC_PROCESS	1134	The chemical reactions and pathways involving carbohydrate derivative. [GOC:TermGenie]	25	0.022	3.48e-15	4.34e-12	SMPD3, CSGALNACT1, CHST11, CNMD, ACAN, XYLT1, PAPSS2, PRELP, FMOD, SLC26A2, ENO1, ALDOA, TPI1, SCD, ADK, SLC35D1, PYGL, CSPG4, SDC4, ITM2A, PGK1, PGAM1, ALDOC, HMGCR, ZBTB20
GOBP_OSSIFICATION	399	The formation of bone or of a bony substance, or the conversion of fibrous tissue or of cartilage into bone or a bony substance. [GOC:mtg_mpo, PMID:17572649]	16	0.0401	6.69e-14	7.15e-11	SMPD3, SOX9, COMP, MATN1, CSGALNACT1, CCN1, FGFR3, PTH1R, THBS3, MGP, XYLT1, UCMA, GDF10, SLC26A2, WNT4, SGMS2
GOBP_CARBOHYDRATE_DERIVATIVE_BIOSYNTHETIC_PROCESS	680	The chemical reactions and pathways resulting in the formation of carbohydrate derivative. [GOC:TermGenie]	19	0.0279	1.64e-13	1.54e-10	SMPD3, CSGALNACT1, CHST11, ACAN, XYLT1, PAPSS2, PRELP, FMOD, SLC26A2, ENO1, ALDOA, TPI1, SCD, ADK, SLC35D1, PYGL, CSPG4, SDC4, ITM2A
GOBP_BONE_GROWTH	26	The increase in size or mass of a bone that contributes to the shaping of that bone. [GOC:dos]	7	0.2692	1.03e-12	7.72e-10	SMPD3, SOX9, COMP, MATN1, COL27A1, FGFR3, THBS3
GOBP_SMALL_MOLECULE_METABOLIC_PROCESS	1886	The chemical reactions and pathways involving small molecules, any low molecular weight, monomeric, non-encoded molecule. [GOC:curators, GOC:pde, GOC:vw]	28	0.0148	1.03e-12	7.72e-10	SOX9, CSGALNACT1, PTH1R, PAPSS2, SLC26A2, ENO1, ALDOA, TPI1, SCD, ADK, SLC35D1, PGK1, PGAM1, ALDOC, HMGCR, ZBTB20, WNT4, C1QTNF3, SLC2A1, SERINC5, FDPS, ME1, PLOD2, MSMO1, GALE, SLC16A3, PPA1, CA12
GOBP_BONE_MINERALIZATION	112	The deposition of hydroxyapatite, a form of calcium phosphate with the formula Ca10(PO4)6(OH)2, in bone tissue. [GOC:mah, PMID:22936354]	10	0.0893	1.5e-12	9.99e-10	SMPD3, SOX9, COMP, MATN1, CCN1, FGFR3, PTH1R, MGP, WNT4, SGMS2
GOBP_CARBOHYDRATE_BIOSYNTHETIC_PROCESS	209	The chemical reactions and pathways resulting in the formation of carbohydrates, any of a group of organic compounds based of the general formula Cx(H2O)y. [ISBN:0198506732]	12	0.0574	1.6e-12	9.99e-10	SMPD3, CSGALNACT1, CHST11, PTH1R, ENO1, ALDOA, TPI1, PGK1, PGAM1, ALDOC, C1QTNF3, SLC2A1
GOBP_BIOMINERALIZATION	161	The process where mineral crystals are formed and deposited in an organized fashion in a matrix (either cellular or extracellular) by living organisms. This gives rise to inorganic compound-based structures such as skeleton, teeth, ivory, shells, cuticle, and corals as well as bacterial biomineralization products. [GOC:aa, PMID:24395694, PMID:28229486]	11	0.0683	2.12e-12	1.22e-09	SMPD3, SOX9, COMP, MATN1, CCN1, FGFR3, PTH1R, MGP, UCMA, WNT4, SGMS2
GOBP_ENDOCHONDRAL_BONE_MORPHOGENESIS	52	The process in which bones are generated and organized as a result of the conversion of initial cartilaginous anlage into bone. [GOC:dph, PMID:11680679]	8	0.1538	3.07e-12	1.64e-09	SMPD3, SOX9, COMP, MATN1, COL27A1, CSGALNACT1, FGFR3, THBS3
GOBP_REGULATION_OF_MULTICELLULAR_ORGANISMAL_DEVELOPMENT	1397	Any process that modulates the frequency, rate or extent of multicellular organismal development. [GOC:obol]	23	0.0165	1.96e-11	9.31e-09	SMPD3, SOX9, COMP, MATN1, LOXL2, CHADL, CCN1, SOX5, SCIN, TRPS1, CNMD, MGP, THBS1, SMOC2, PGK1, WNT4, SGMS2, ID1, HES1, CD24, LGALS3, EGLN1, NCMAP
GOBP_REGULATION_OF_CARTILAGE_DEVELOPMENT	65	Any process that modulates the rate, frequency, or extent of cartilage development, the process whose specific outcome is the progression of the cartilage over time, from its formation to the mature structure. Cartilage is a connective tissue dominated by extracellular matrix containing collagen type II and large amounts of proteoglycan, particularly chondroitin sulfate. [GOC:dph]	8	0.1231	1.99e-11	9.31e-09	SMPD3, SOX9, LOXL2, CHADL, CCN1, SOX5, SCIN, TRPS1
GOBP_ORGANOPHOSPHATE_METABOLIC_PROCESS	1024	The chemical reactions and pathways involving organophosphates, any phosphate-containing organic compound. [ISBN:0198506732]	20	0.0195	2.39e-11	1.05e-08	SMPD3, PTH1R, PAPSS2, SLC26A2, ENO1, ALDOA, TPI1, SCD, ADK, PYGL, PGK1, PGAM1, ALDOC, HMGCR, ZBTB20, SGMS2, SERINC5, FDPS, ME1, SLC44A2
GOBP_SMALL_MOLECULE_BIOSYNTHETIC_PROCESS	692	The chemical reactions and pathways resulting in the formation of small molecules, any low molecular weight, monomeric, non-encoded molecule. [GOC:curators, GOC:pde, GOC:vw]	17	0.0246	2.58e-11	1.07e-08	PTH1R, ENO1, ALDOA, TPI1, SCD, ADK, SLC35D1, PGK1, PGAM1, ALDOC, HMGCR, WNT4, C1QTNF3, SERINC5, FDPS, PLOD2, MSMO1
GOBP_SKELETAL_SYSTEM_MORPHOGENESIS	212	The process in which the anatomical structures of the skeleton are generated and organized. [GOC:dph, GOC:dsf, GOC:jid, GOC:tb]	11	0.0519	4.21e-11	1.66e-08	SMPD3, SOX9, COMP, MATN1, COL27A1, CSGALNACT1, CHST11, FGFR3, SOX5, THBS3, MGP
GOBP_CARBOHYDRATE_METABOLIC_PROCESS	618	The chemical reactions and pathways involving carbohydrates, any of a group of organic compounds based of the general formula Cx(H2O)y. Includes the formation of carbohydrate derivatives by the addition of a carbohydrate residue to another molecule. [GOC:mah, ISBN:0198506732]	16	0.0259	4.81e-11	1.76e-08	SMPD3, CSGALNACT1, CHST11, PTH1R, ENO1, ALDOA, TPI1, PYGL, PGK1, PGAM1, ALDOC, ZBTB20, C1QTNF3, SLC2A1, ME1, GALE
GOBP_ORGANIC_ACID_METABOLIC_PROCESS	1067	The chemical reactions and pathways involving organic acids, any acidic compound containing carbon in covalent linkage. [ISBN:0198506732]	20	0.0187	4.94e-11	1.76e-08	SOX9, CSGALNACT1, PAPSS2, SLC26A2, ENO1, ALDOA, TPI1, SCD, SLC35D1, PGK1, PGAM1, ALDOC, ZBTB20, SLC2A1, SERINC5, ME1, PLOD2, MSMO1, SLC16A3, PPA1
GOBP_ENZYME_LINKED_RECEPTOR_PROTEIN_SIGNALING_PATHWAY	1072	Any series of molecular signals initiated by the binding of an extracellular ligand to a receptor on the surface of the target cell, where the receptor possesses catalytic activity or is closely associated with an enzyme such as a protein kinase, and ending with regulation of a downstream cellular process, e.g. transcription. [GOC:mah, GOC:signaling, ISBN:0815316194]	20	0.0187	5.36e-11	1.82e-08	SMPD3, SOX9, COMP, CCN1, CHST11, FGFR3, CNMD, UCMA, GDF10, FMOD, THBS1, SMOC2, CSPG4, WNT4, ID1, HES1, CDKN1C, FGFRL1, IGF1R, HIP1R
GOBP_RESPONSE_TO_GROWTH_FACTOR	731	Any process that results in a change in state or activity of a cell or an organism (in terms of movement, secretion, enzyme production, gene expression, etc.) as a result of a growth factor stimulus. [GOC:BHF, GOC:mah]	17	0.0233	6.03e-11	1.95e-08	SMPD3, SOX9, COMP, CCN1, CHST11, FGFR3, SOX5, CNMD, GDF10, FMOD, THBS1, SMOC2, WNT4, ID1, HES1, CDKN1C, FGFRL1
GOBP_AMINOGLYCAN_BIOSYNTHETIC_PROCESS	114	The chemical reactions and pathways resulting in the formation of aminoglycans, any polymer containing amino groups that consists of more than about 10 monosaccharide residues joined to each other by glycosidic linkages. [GOC:ai, ISBN:0198506732]	9	0.0789	6.26e-11	1.95e-08	SMPD3, CSGALNACT1, CHST11, ACAN, XYLT1, PRELP, FMOD, CSPG4, SDC4
GOBP_CELL_POPULATION_PROLIFERATION	1955	The multiplication or reproduction of cells, resulting in the expansion of a cell population. [GOC:mah, GOC:mb]	26	0.0133	8.6e-11	2.57e-08	SMPD3, SOX9, COMP, LOXL2, CCN1, CHST11, FGFR3, PTH1R, SOX5, SCIN, CNMD, THBS1, CSPG4, SDC4, WNT4, ID1, HES1, CD24, LGALS3, CDKN1C, IGF1R, P3H2, HLA-DMB, S100B, H2AC4, ECRG4
GOBP_CARTILAGE_DEVELOPMENT_INVOLVED_IN_ENDOCHONDRAL_BONE_MORPHOGENESIS	26	The process whose specific outcome is the progression of the cartilage that will provide a scaffold for mineralization of endochondral bones. [GOC:dph]	6	0.2308	1.28e-10	3.68e-08	SMPD3, SOX9, COMP, MATN1, COL27A1, THBS3
GOBP_RESPONSE_TO_OXYGEN_LEVELS	384	Any process that results in a change in state or activity of a cell or an organism (in terms of movement, secretion, enzyme production, gene expression, etc.) as a result of a stimulus reflecting the presence, absence, or concentration of oxygen. [GOC:BHF, GOC:mah]	13	0.0339	1.37e-10	3.78e-08	LOXL2, THBS1, ENO1, PGK1, SLC2A1, PLOD2, CD24, EGLN1, BNIP3, COX4I2, SLC8A3, HIGD1A, FAM162A
GOBP_CHONDROCYTE_DEVELOPMENT	28	The process whose specific outcome is the progression of a chondrocyte over time, from its commitment to its mature state. Chondrocyte development does not include the steps involved in committing a chondroblast to a chondrocyte fate. [GOC:dph]	6	0.2143	2.08e-10	5.56e-08	SMPD3, SOX9, COMP, MATN1, COL27A1, CHST11
GOBP_GLYCOLYTIC_PROCESS_THROUGH_FRUCTOSE_6_PHOSPHATE	29	The chemical reactions and pathways resulting in the breakdown of a monosaccharide into pyruvate, occurring through a fructose-6-phosphate intermediate, with the concomitant production of ATP and NADH. [GOC:dph, ISBN:0201090910, ISBN:0879010479]	6	0.2069	2.62e-10	6.75e-08	ENO1, ALDOA, TPI1, PGK1, PGAM1, ALDOC
GOBP_BONE_MORPHOGENESIS	90	The process in which bones are generated and organized. [GOC:dph]	8	0.0889	2.88e-10	7.17e-08	SMPD3, SOX9, COMP, MATN1, COL27A1, CSGALNACT1, FGFR3, THBS3
GOBP_BONE_DEVELOPMENT	192	The process whose specific outcome is the progression of bone over time, from its formation to the mature structure. Bone is the hard skeletal connective tissue consisting of both mineral and cellular components. [GOC:dph]	10	0.0521	3.22e-10	7.77e-08	SMPD3, SOX9, COMP, MATN1, COL27A1, CSGALNACT1, FGFR3, THBS3, EPYC, XYLT1
GOBP_SULFUR_COMPOUND_BIOSYNTHETIC_PROCESS	193	The chemical reactions and pathways resulting in the formation of compounds that contain sulfur, such as the amino acids methionine and cysteine or the tripeptide glutathione. [GOC:jl]	10	0.0518	3.39e-10	7.92e-08	CSGALNACT1, CHST11, ACAN, XYLT1, PAPSS2, PRELP, FMOD, SLC26A2, SCD, CSPG4
GOBP_REGULATION_OF_BIOMINERALIZATION	95	Any process that modulates the frequency, rate or extent of biomineralization, the formation and deposition of mineral crystals by living organisms. [PMID:22992051]	8	0.0842	4.46e-10	1.01e-07	SOX9, COMP, MATN1, CCN1, MGP, UCMA, WNT4, SGMS2
GOBP_NUCLEOBASE_CONTAINING_SMALL_MOLECULE_METABOLIC_PROCESS	617	The cellular chemical reactions and pathways involving a nucleobase-containing small molecule: a nucleobase, a nucleoside, or a nucleotide. [GOC:vw]	15	0.0243	4.79e-10	1.05e-07	CSGALNACT1, PAPSS2, SLC26A2, ENO1, ALDOA, TPI1, SCD, ADK, SLC35D1, PGK1, PGAM1, ALDOC, HMGCR, ZBTB20, ME1
GOBP_GENERATION_OF_PRECURSOR_METABOLITES_AND_ENERGY	524	The chemical reactions and pathways resulting in the formation of precursor metabolites, substances from which energy is derived, and any process involved in the liberation of energy from these substances. [GOC:jl]	14	0.0267	5.63e-10	1.2e-07	LOXL2, ENO1, ALDOA, TPI1, PYGL, PGK1, PGAM1, ALDOC, ZBTB20, ME1, BNIP3, COX4I2, P4HA2, NDUFA4L2
GOBP_GROWTH_PLATE_CARTILAGE_DEVELOPMENT	15	The process whose specific outcome is the progression of the cartilage that will provide a scaffold for mineralization of endochondral bones as they elongate or grow. [GOC:ascb_2009, GOC:dph, GOC:tb]	5	0.3333	6.04e-10	1.26e-07	SOX9, COMP, MATN1, COL27A1, THBS3
GOBP_MONOSACCHARIDE_CATABOLIC_PROCESS	62	The chemical reactions and pathways resulting in the breakdown of monosaccharides, polyhydric alcohols containing either an aldehyde or a keto group and between three to ten or more carbon atoms. [ISBN:0198506732]	7	0.1129	7.02e-10	1.42e-07	ENO1, ALDOA, TPI1, PGK1, PGAM1, ALDOC, GALE
GOBP_PYRUVATE_METABOLIC_PROCESS	150	The chemical reactions and pathways involving pyruvate, 2-oxopropanoate. [GOC:go_curators]	9	0.06	7.33e-10	1.44e-07	ENO1, ALDOA, TPI1, PGK1, PGAM1, ALDOC, ZBTB20, ME1, SLC16A3
GOBP_GLUCOSE_CATABOLIC_PROCESS	36	The chemical reactions and pathways resulting in the breakdown of glucose, the aldohexose gluco-hexose. [GOC:ai]	6	0.1667	1.06e-09	2.02e-07	ENO1, ALDOA, TPI1, PGK1, PGAM1, ALDOC
GOBP_MUCOPOLYSACCHARIDE_METABOLIC_PROCESS	115	The chemical reactions and pathways involving mucopolysaccharide. [GO_REF:0000068, GOC:dph, GOC:TermGenie, PMID:4236091]	8	0.0696	2.06e-09	3.86e-07	SMPD3, CSGALNACT1, CHST11, ACAN, XYLT1, PRELP, FMOD, CSPG4
GOBP_RESPONSE_TO_ENDOGENOUS_STIMULUS	1624	Any process that results in a change in state or activity of a cell or an organism (in terms of movement, secretion, enzyme production, gene expression, etc.) as a result of a stimulus arising within the organism. [GOC:sm]	22	0.0135	2.17e-09	3.97e-07	SMPD3, SOX9, COMP, CCN1, CHST11, FGFR3, SOX5, GDF10, FMOD, THBS1, SMOC2, WNT4, SLC2A1, ME1, ID1, HES1, CD24, CDKN1C, FGFRL1, IGF1R, SLC8A3, FIBIN
GOBP_ORGANONITROGEN_COMPOUND_BIOSYNTHETIC_PROCESS	1786	The chemical reactions and pathways resulting in the formation of organonitrogen compound. [GOC:pr, GOC:TermGenie]	23	0.0129	2.32e-09	4.1e-07	SMPD3, CSGALNACT1, CCN1, CHST11, ACAN, XYLT1, PAPSS2, PRELP, FMOD, THBS1, SLC26A2, ENO1, ALDOA, SCD, ADK, CSPG4, SDC4, ITM2A, SGMS2, SERINC5, PLOD2, PPA1, SLC44A2
GOBP_ORGANOPHOSPHATE_BIOSYNTHETIC_PROCESS	586	The chemical reactions and pathways resulting in the biosynthesis of deoxyribose phosphate, the phosphorylated sugar 2-deoxy-erythro-pentose. [GOC:chem_mtg]	14	0.0239	2.36e-09	4.1e-07	PTH1R, PAPSS2, SLC26A2, ENO1, ALDOA, TPI1, SCD, ADK, PYGL, SGMS2, SERINC5, FDPS, ME1, SLC44A2
GOBP_AMINOGLYCAN_METABOLIC_PROCESS	172	The chemical reactions and pathways involving aminoglycans, any polymer containing amino groups that consists of more than about 10 monosaccharide residues joined to each other by glycosidic linkages. [GOC:ai, ISBN:0198506732]	9	0.0523	2.46e-09	4.18e-07	SMPD3, CSGALNACT1, CHST11, ACAN, XYLT1, PRELP, FMOD, CSPG4, SDC4
GOBP_REGULATION_OF_BONE_MINERALIZATION	75	Any process that modulates the frequency, rate or extent of bone mineralization. [GOC:go_curators]	7	0.0933	2.75e-09	4.57e-07	SOX9, COMP, MATN1, CCN1, MGP, WNT4, SGMS2
GOBP_NADH_METABOLIC_PROCESS	43	The chemical reactions and pathways involving reduced nicotinamide adenine dinucleotide (NADH), a coenzyme present in most living cells and derived from the B vitamin nicotinic acid. [GOC:jl, ISBN:0618254153]	6	0.1395	3.25e-09	5.28e-07	ENO1, ALDOA, TPI1, PGK1, PGAM1, ALDOC
GOBP_CHONDROCYTE_DEVELOPMENT_INVOLVED_IN_ENDOCHONDRAL_BONE_MORPHOGENESIS	8	The progression of a chondrocyte over time from after its commitment to its mature state where the chondrocyte will contribute to the shaping of an endochondral bone. [GOC:ascb_2009, GOC:dph, GOC:tb]	4	0.5	5.01e-09	7.97e-07	SMPD3, SOX9, MATN1, COL27A1
GOBP_REGULATION_OF_CHONDROCYTE_DIFFERENTIATION	48	Any process that modulates the frequency, rate or extent of chondrocyte differentiation. [GOC:mah]	6	0.125	6.46e-09	1.01e-06	SOX9, LOXL2, CHADL, SOX5, SCIN, TRPS1
GOBP_CARBOHYDRATE_CATABOLIC_PROCESS	197	The chemical reactions and pathways resulting in the breakdown of carbohydrates, any of a group of organic compounds based of the general formula Cx(H2O)y. [ISBN:0198506732]	9	0.0457	8.05e-09	1.23e-06	ENO1, ALDOA, TPI1, PYGL, PGK1, PGAM1, ALDOC, ZBTB20, GALE
GOBP_NAD_METABOLIC_PROCESS	51	The chemical reactions and pathways involving nicotinamide adenine dinucleotide (NAD), a coenzyme present in most living cells and derived from the B vitamin nicotinic acid. [GOC:jl, ISBN:0618254153]	6	0.1176	9.41e-09	1.41e-06	ENO1, ALDOA, TPI1, PGK1, PGAM1, ALDOC
GOBP_TRANSMEMBRANE_RECEPTOR_PROTEIN_SERINE_THREONINE_KINASE_SIGNALING_PATHWAY	358	A series of molecular signals initiated by the binding of an extracellular ligand to a receptor on the surface of the target cell where the receptor possesses serine/threonine kinase activity, and ending with regulation of a downstream cellular process, e.g. transcription. [GOC:mah, GOC:signaling]	11	0.0307	1.04e-08	1.53e-06	SMPD3, COMP, CCN1, CHST11, UCMA, GDF10, FMOD, THBS1, ID1, HES1, CDKN1C
GOBP_PURINE_CONTAINING_COMPOUND_METABOLIC_PROCESS	459	The chemical reactions and pathways involving a purine-containing compound, i.e. any compound that contains purine or a formal derivative thereof. [GOC:mah]	12	0.0261	1.3e-08	1.87e-06	PAPSS2, SLC26A2, ENO1, ALDOA, TPI1, SCD, ADK, PGK1, PGAM1, ALDOC, HMGCR, ZBTB20
GOBP_PROTEIN_HYDROXYLATION	27	The addition of a hydroxy group to a protein amino acid. [GOC:ai]	5	0.1852	1.58e-08	2.23e-06	PLOD2, EGLN1, P3H2, P4HA2, P4HA1
GOBP_MONOSACCHARIDE_BIOSYNTHETIC_PROCESS	97	The chemical reactions and pathways resulting in the formation of monosaccharides, polyhydric alcohols containing either an aldehyde or a keto group and between three to ten or more carbon atoms. [ISBN:0198506732]	7	0.0722	1.69e-08	2.33e-06	ENO1, ALDOA, TPI1, PGK1, PGAM1, ALDOC, C1QTNF3
GOBP_TUBE_DEVELOPMENT	1085	The process whose specific outcome is the progression of a tube over time, from its initial formation to a mature structure. Epithelial and endothelial tubes transport gases, liquids and cells from one site to another and form the basic structure of many organs and tissues including lung and trachea, kidney, the mammary gland, the vascular system and the gastrointestinal and urinary-genital tract…	17	0.0157	2.24e-08	3.04e-06	SMPD3, SOX9, COMP, LOXL2, CCN1, CNMD, THBS1, SMOC2, CSPG4, SDC4, PGK1, WNT4, ID1, HES1, CD24, EGLN1, MFGE8
GOBP_REGULATION_OF_OSSIFICATION	111	Any process that modulates the frequency, rate or extent of ossification, the formation of bone or of a bony substance or the conversion of fibrous tissue or of cartilage into bone or a bony substance. [GOC:go_curators]	7	0.0631	4.31e-08	5.75e-06	SOX9, COMP, MATN1, CCN1, MGP, WNT4, SGMS2
GOBP_ANATOMICAL_STRUCTURE_FORMATION_INVOLVED_IN_MORPHOGENESIS	1142	The developmental process pertaining to the initial formation of an anatomical structure from unspecified parts. This process begins with the specific processes that contribute to the appearance of the discrete structure and ends when the structural rudiment is recognizable. An anatomical structure is any biological entity that occupies space and is distinguished from its surroundings. Anatomical…	17	0.0149	4.68e-08	6.14e-06	SMPD3, SOX9, LOXL2, CCN1, CNMD, THBS3, THBS1, SMOC2, CSPG4, SDC4, PGK1, WNT4, ID1, HES1, EGLN1, NCMAP, MFGE8
GOBP_CHONDROCYTE_DIFFERENTIATION_INVOLVED_IN_ENDOCHONDRAL_BONE_MORPHOGENESIS	14	The process in which a chondroblast acquires specialized structural and/or functional features of a chondrocyte that will contribute to the development of a bone. A chondrocyte is a polymorphic cell that forms cartilage. [GOC:ascb_2009, GOC:dph, GOC:tb]	4	0.2857	7.06e-08	9.09e-06	SMPD3, SOX9, MATN1, COL27A1
GOBP_BIOLOGICAL_ADHESION	1481	The attachment of a cell or organism to a substrate, another cell, or other organism. Biological adhesion includes intracellular attachment between membrane regions. [GOC:isa_complete]	19	0.0128	7.28e-08	9.09e-06	SOX9, COMP, LOXL2, CCN1, THBS3, ACAN, HAPLN1, THBS1, NID2, SDC4, WNT4, ID1, HES1, CD24, LGALS3, FGFRL1, HLA-DMB, MFGE8, SUSD5
GOBP_TUBE_MORPHOGENESIS	900	The process in which the anatomical structures of a tube are generated and organized. Epithelial and endothelial tubes transport gases, liquids and cells from one site to another and form the basic structure of many organs and tissues, with tube shape and organization varying from the single-celled excretory organ in Caenorhabditis elegans to the branching trees of the mammalian kidney and insect…	15	0.0167	7.29e-08	9.09e-06	SOX9, COMP, LOXL2, CCN1, CNMD, THBS1, SMOC2, CSPG4, SDC4, PGK1, WNT4, ID1, HES1, EGLN1, MFGE8
GOBP_RESPONSE_TO_TRANSFORMING_GROWTH_FACTOR_BETA	257	Any process that results in a change in state or activity of a cell or an organism (in terms of movement, secretion, enzyme production, gene expression, etc.) as a result of a transforming growth factor beta stimulus. [GOC:mah]	9	0.035	7.95e-08	9.74e-06	SOX9, CHST11, SOX5, GDF10, FMOD, THBS1, WNT4, ID1, CDKN1C
GOBP_PEPTIDYL_PROLINE_HYDROXYLATION	15	The hydroxylation of peptidyl-proline to form peptidyl-hydroxyproline. [GOC:mah]	4	0.2667	9.61e-08	1.16e-05	EGLN1, P3H2, P4HA2, P4HA1
GOBP_BLOOD_VESSEL_MORPHOGENESIS	677	The process in which the anatomical structures of blood vessels are generated and organized. The blood vessel is the vasculature carrying blood. [GOC:jid]	13	0.0192	1.16e-07	1.37e-05	COMP, LOXL2, CCN1, CNMD, THBS1, SMOC2, CSPG4, PGK1, WNT4, ID1, HES1, EGLN1, MFGE8
GOBP_MONOSACCHARIDE_METABOLIC_PROCESS	272	The chemical reactions and pathways involving monosaccharides, the simplest carbohydrates. They are polyhydric alcohols containing either an aldehyde or a keto group and between three to ten or more carbon atoms. They form the constitutional repeating units of oligo- and polysaccharides. [ISBN:0198506732]	9	0.0331	1.29e-07	1.5e-05	ENO1, ALDOA, TPI1, PGK1, PGAM1, ALDOC, C1QTNF3, SLC2A1, GALE
GOBP_NUCLEOTIDE_PHOSPHORYLATION	133	The process of introducing one or more phosphate groups into a nucleotide to produce a phosphorylated nucleoside. [GOC:ai]	7	0.0526	1.5e-07	1.72e-05	ENO1, ALDOA, TPI1, PGK1, PGAM1, ALDOC, ZBTB20
GOBP_SULFUR_COMPOUND_METABOLIC_PROCESS	378	The chemical reactions and pathways involving the nonmetallic element sulfur or compounds that contain sulfur, such as the amino acids methionine and cysteine or the tripeptide glutathione. [GOC:ai]	10	0.0265	2.01e-07	2.27e-05	CSGALNACT1, CHST11, ACAN, XYLT1, PAPSS2, PRELP, FMOD, SLC26A2, SCD, CSPG4
GOBP_REGULATION_OF_PHOSPHORUS_METABOLIC_PROCESS	1610	Any process that modulates the frequency, rate or extent of the chemical reactions and pathways involving phosphorus or compounds containing phosphorus. [GOC:ai]	19	0.0118	2.63e-07	2.94e-05	SMPD3, SOX9, CCN1, FGFR3, PTH1R, GDF10, THBS1, ENO1, CSPG4, SDC4, PGAM1, ZBTB20, HES1, CD24, LGALS3, CDKN1C, IGF1R, SLC8A3, NRK
GOBP_REGULATION_OF_LIPID_METABOLIC_PROCESS	401	Any process that modulates the frequency, rate or extent of the chemical reactions and pathways involving lipids. [GOC:go_curators]	10	0.0249	3.45e-07	3.79e-05	SMPD3, SOX9, CCN1, FGFR3, SCD, HMGCR, ZBTB20, WNT4, FDPS, ME1
GOBP_ANIMAL_ORGAN_MORPHOGENESIS	1025	Morphogenesis of an animal organ. An organ is defined as a tissue or set of tissues that work together to perform a specific function or functions. Morphogenesis is the process in which anatomical structures are generated and organized. Organs are commonly observed as visibly distinct structures, but may also exist as loosely associated clusters of cells that work together to perform a specific f…	15	0.0146	3.83e-07	4.15e-05	SMPD3, SOX9, COMP, MATN1, COL27A1, CSGALNACT1, CCN1, CHST11, FGFR3, SOX5, THBS3, MGP, COL9A1, WNT4, HES1
GOBP_NUCLEOSIDE_DIPHOSPHATE_METABOLIC_PROCESS	156	The chemical reactions and pathways involving a nucleoside diphosphate, a compound consisting of a nucleobase linked to a deoxyribose or ribose sugar esterified with diphosphate on the sugar. [GOC:go_curators, ISBN:0198506732]	7	0.0449	4.42e-07	4.73e-05	ENO1, ALDOA, TPI1, PGK1, PGAM1, ALDOC, ZBTB20
GOBP_CELLULAR_RESPONSE_TO_OXYGEN_LEVELS	230	Any process that results in a change in state or activity of a cell (in terms of movement, secretion, enzyme production, gene expression, etc.) as a result of a stimulus reflecting the presence, absence, or concentration of oxygen. [GOC:mah]	8	0.0348	4.52e-07	4.77e-05	ENO1, PGK1, EGLN1, BNIP3, COX4I2, SLC8A3, HIGD1A, FAM162A
GOBP_MONOCARBOXYLIC_ACID_METABOLIC_PROCESS	645	The chemical reactions and pathways involving monocarboxylic acids, any organic acid containing one carboxyl (COOH) group or anion (COO-). [GOC:vk]	12	0.0186	5.09e-07	5.29e-05	SOX9, ENO1, ALDOA, TPI1, SCD, PGK1, PGAM1, ALDOC, ZBTB20, ME1, MSMO1, SLC16A3
GOBP_COLLAGEN_FIBRIL_ORGANIZATION	54	Any process that determines the size and arrangement of collagen fibrils within an extracellular matrix. [GOC:mah, ISBN:0815316194]	5	0.0926	5.8e-07	5.95e-05	COMP, LOXL2, CHADL, COL11A2, FMOD
GOBP_VASCULATURE_DEVELOPMENT	786	The process whose specific outcome is the progression of the vasculature over time, from its formation to the mature structure. The vasculature is an interconnected tubular multi-tissue structure that contains fluid that is actively transported around the organism. [GOC:dph, UBERON:0002409]	13	0.0165	6.25e-07	6.32e-05	COMP, LOXL2, CCN1, CNMD, THBS1, SMOC2, CSPG4, PGK1, WNT4, ID1, HES1, EGLN1, MFGE8
GOBP_ORGAN_GROWTH	166	The increase in size or mass of an organ. Organs are commonly observed as visibly distinct structures, but may also exist as loosely associated clusters of cells that function together as to perform a specific function. [GOC:bf, ISBN:0471245208, ISBN:0721662544]	7	0.0422	6.73e-07	6.71e-05	SMPD3, SOX9, COMP, MATN1, COL27A1, FGFR3, THBS3
GOBP_REGULATION_OF_SMALL_MOLECULE_METABOLIC_PROCESS	436	Any process that modulates the rate, frequency or extent of a small molecule metabolic process. [GOC:vw]	10	0.0229	7.37e-07	7.25e-05	SOX9, PTH1R, ENO1, SCD, PGAM1, HMGCR, ZBTB20, WNT4, C1QTNF3, FDPS
GOBP_CHONDROITIN_SULFATE_BIOSYNTHETIC_PROCESS	25	The chemical reactions and pathways resulting in the formation of chondroitin sulfate, any member of a group of 10-60 kDa glycosaminoglycans, widely distributed in cartilage and other mammalian connective tissues, the repeat units of which consist of beta-(1,4)-linked D-glucuronyl beta-(1,3)-N-acetyl-D-galactosamine sulfate. [GOC:mah, ISBN:0198506732]	4	0.16	8.7e-07	8.46e-05	CSGALNACT1, CHST11, XYLT1, CSPG4
GOBP_POSITIVE_REGULATION_OF_PHOSPHORUS_METABOLIC_PROCESS	981	Any process that increases the frequency, rate or extent of the chemical reactions and pathways involving phosphorus or compounds containing phosphorus. [GOC:dph, GOC:tb]	14	0.0143	1.29e-06	0.000124	SOX9, CCN1, FGFR3, PTH1R, GDF10, THBS1, ENO1, CSPG4, SDC4, ZBTB20, HES1, CD24, IGF1R, NRK
GOBP_POSITIVE_REGULATION_OF_CARTILAGE_DEVELOPMENT	29	Any process that increases the rate, frequency, or extent of cartilage development, the process whose specific outcome is the progression of the cartilage over time, from its formation to the mature structure. Cartilage is a connective tissue dominated by extracellular matrix containing collagen type II and large amounts of proteoglycan, particularly chondroitin sulfate. [GOC:dph]	4	0.1379	1.62e-06	0.000153	SOX9, LOXL2, CCN1, SOX5
GOBP_AMINOGLYCAN_CATABOLIC_PROCESS	68	The chemical reactions and pathways resulting in the breakdown of aminoglycans, any polymer containing amino groups that consists of more than about 10 monosaccharide residues joined to each other by glycosidic linkages. [GOC:ai, ISBN:0198506732]	5	0.0735	1.85e-06	0.000172	ACAN, PRELP, FMOD, CSPG4, SDC4
GOBP_CHONDROITIN_SULFATE_PROTEOGLYCAN_BIOSYNTHETIC_PROCESS	30	The chemical reactions and pathways resulting in the formation of chondroitin sulfate proteoglycan, any glycoprotein whose glycosaminoglycan units are chondroitin sulfate. Chondroitin sulfates are a group of 10-60 kDa glycosaminoglycans, widely distributed in cartilage and other mammalian connective tissues; the repeat units consist of beta-(1,4)-linked D-glucuronyl beta-(1,3)-N-acetyl-D-galactos…	4	0.1333	1.86e-06	0.000172	CSGALNACT1, CHST11, XYLT1, CSPG4
GOBP_RIBOSE_PHOSPHATE_BIOSYNTHETIC_PROCESS	195	The chemical reactions and pathways resulting in the formation of ribose phosphate, any phosphorylated ribose sugar. [GOC:ai]	7	0.0359	1.97e-06	0.00018	PAPSS2, SLC26A2, ENO1, ALDOA, SCD, ADK, PYGL
GOBP_GROWTH_PLATE_CARTILAGE_CHONDROCYTE_DIFFERENTIATION	9	The process in which a chondroblast acquires specialized structural and/or functional features of a chondrocyte that will contribute to the growth of a bone. A chondrocyte is a polymorphic cell that forms cartilage. [GOC:ascb_2009, GOC:dph, GOC:tb]	3	0.3333	2.08e-06	0.000187	SOX9, MATN1, COL27A1
GOBP_REGULATION_OF_LIPID_BIOSYNTHETIC_PROCESS	202	Any process that modulates the frequency, rate or extent of the chemical reactions and pathways resulting in the formation of lipids. [GOC:ai]	7	0.0347	2.49e-06	0.000222	SMPD3, CCN1, SCD, HMGCR, ZBTB20, WNT4, FDPS
GOBP_METANEPHRIC_TUBULE_MORPHOGENESIS	10	The process in which the anatomical structures of a metanephric tubule are generated and organized from an epithelium. A metanephric tubule is an epithelial tube that is part of the metanephros. [GOC:mtg_kidney_jan10]	3	0.3	2.96e-06	0.000256	SOX9, WNT4, HES1
GOBP_PEPTIDYL_PROLINE_HYDROXYLATION_TO_4_HYDROXY_L_PROLINE	10	The modification of peptidyl-proline to form 4-hydroxy-L-proline; catalyzed by procollagen-proline,2-oxoglutarate-4-dioxygenase. [RESID:AA0030]	3	0.3	2.96e-06	0.000256	EGLN1, P4HA2, P4HA1
GOBP_REGULATION_OF_CELLULAR_RESPONSE_TO_GROWTH_FACTOR_STIMULUS	296	Any process that modulates the rate, frequency, or extent of a change in state or activity of a cell (in terms of movement, secretion, enzyme production, gene expression, etc.) as a result of a growth factor stimulus. [GOC:tb]	8	0.027	2.98e-06	0.000256	CCN1, CHST11, CNMD, THBS1, SMOC2, WNT4, HES1, CDKN1C
GOBP_REGULATION_OF_ALCOHOL_BIOSYNTHETIC_PROCESS	75	Any process that modulates the frequency, rate or extent of alcohol biosynthetic process. [GO_REF:0000058, GOC:mengo_curators, GOC:TermGenie, PMID:23332010]	5	0.0667	3.01e-06	0.000256	PTH1R, SCD, HMGCR, WNT4, FDPS
GOBP_GLUCOSE_METABOLIC_PROCESS	210	The chemical reactions and pathways involving glucose, the aldohexose gluco-hexose. D-glucose is dextrorotatory and is sometimes known as dextrose; it is an important source of energy for living organisms and is found free as well as combined in homo- and hetero-oligosaccharides and polysaccharides. [ISBN:0198506732]	7	0.0333	3.22e-06	0.000271	ENO1, ALDOA, TPI1, PGK1, PGAM1, ALDOC, C1QTNF3
GOBP_POSITIVE_REGULATION_OF_MULTICELLULAR_ORGANISMAL_PROCESS	1397	Any process that activates or increases the frequency, rate or extent of an organismal process, any of the processes pertinent to the function of an organism above the cellular level; includes the integrated processes of tissues and organs. [GOC:ai]	16	0.0115	3.73e-06	0.00031	SOX9, LOXL2, CCN1, SOX5, THBS1, SMOC2, ENO1, SCD, WNT4, C1QTNF3, HES1, NCMAP, IGF1R, STMP1, PANX3, IL17B
GOBP_NEGATIVE_REGULATION_OF_DEVELOPMENTAL_PROCESS	928	Any process that stops, prevents or reduces the rate or extent of development, the biological process whose specific outcome is the progression of an organism over time from an initial condition (e.g. a zygote, or a young adult) to a later condition (e.g. a multicellular animal or an aged adult). [GOC:ai]	13	0.014	3.88e-06	0.000316	SOX9, LOXL2, CHADL, FGFR3, CNMD, UCMA, GDF10, THBS1, PGK1, WNT4, ID1, HES1, BNIP3
GOBP_APOPTOTIC_PROCESS	1931	A programmed cell death process which begins when a cell receives an internal (e.g. DNA damage) or external signal (e.g. an extracellular death ligand), and proceeds through a series of biochemical events (signaling pathway phase) which trigger an execution phase. The execution phase is the last step of an apoptotic process, and is typically characterized by rounding-up of the cell, retraction of…	19	0.0098	3.88e-06	0.000316	SOX9, COMP, CCN1, CHST11, FGFR3, SCIN, THBS1, ENO1, WNT4, ID1, CD24, LGALS3, IGF1R, HIP1R, BNIP3, HIGD1A, FAM162A, PLAGL1, PEG3
GOBP_ATP_METABOLIC_PROCESS	313	The chemical reactions and pathways involving ATP, adenosine triphosphate, a universally important coenzyme and enzyme regulator. [GOC:go_curators]	8	0.0256	4.49e-06	0.000358	ENO1, ALDOA, TPI1, PGK1, PGAM1, ALDOC, ZBTB20, COX4I2
GOBP_POSITIVE_REGULATION_OF_CELL_POPULATION_PROLIFERATION	941	Any process that activates or increases the rate or extent of cell proliferation. [GOC:go_curators]	13	0.0138	4.5e-06	0.000358	SMPD3, SOX9, COMP, CCN1, FGFR3, PTH1R, THBS1, ID1, HES1, CD24, IGF1R, HLA-DMB, S100B
GOBP_CELL_MIGRATION	1602	The controlled self-propelled movement of a cell from one site to a destination guided by molecular cues. Cell migration is a central process in the development and maintenance of multicellular organisms. [GOC:cjm, GOC:dph, GOC:ems, GOC:pf, Wikipedia:Cell_migration]	17	0.0106	4.97e-06	0.000391	SMPD3, SOX9, LOXL2, CCN1, THBS1, SMOC2, CSPG4, SDC4, WNT4, SLC16A3, ID1, HES1, CD24, LGALS3, IGF1R, TUBB2A, C10orf99
GOBP_KERATAN_SULFATE_CATABOLIC_PROCESS	12	The chemical reactions and pathways resulting in the breakdown of keratan sulfate, a glycosaminoglycan with repeat units consisting of beta-1,4-linked D-galactopyranosyl-beta-(1,4)-N-acetyl-D-glucosamine 6-sulfate and with variable amounts of fucose, sialic acid and mannose units; keratan sulfate chains are covalently linked by a glycosidic attachment through the trisaccharide galactosyl-galactos…	3	0.25	5.41e-06	0.000422	ACAN, PRELP, FMOD
GOBP_PROTEOGLYCAN_METABOLIC_PROCESS	87	The chemical reactions and pathways involving proteoglycans, any glycoprotein in which the carbohydrate units are glycosaminoglycans. [GOC:mah, ISBN:0198506732]	5	0.0575	6.27e-06	0.000484	CSGALNACT1, CHST11, CNMD, XYLT1, CSPG4
GOBP_CIRCULATORY_SYSTEM_DEVELOPMENT	1140	The process whose specific outcome is the progression of the circulatory system over time, from its formation to the mature structure. The circulatory system is the organ system that passes nutrients (such as amino acids and electrolytes), gases, hormones, blood cells, etc. to and from cells in the body to help fight diseases and help stabilize body temperature and pH to maintain homeostasis. [GO…	14	0.0123	7.25e-06	0.000554	SOX9, COMP, LOXL2, CCN1, CNMD, THBS1, SMOC2, CSPG4, PGK1, WNT4, ID1, HES1, EGLN1, MFGE8
GOBP_ALCOHOL_BIOSYNTHETIC_PROCESS	156	The chemical reactions and pathways resulting in the formation of alcohols, any of a class of compounds containing one or more hydroxyl groups attached to a saturated carbon atom. [GOC:ai]	6	0.0385	7.38e-06	0.000558	PTH1R, SCD, HMGCR, WNT4, FDPS, MSMO1
GOBP_NEGATIVE_REGULATION_OF_CELL_DEATH	991	Any process that decreases the rate or frequency of cell death. Cell death is the specific activation or halting of processes within a cell so that its vital functions markedly cease, rather than simply deteriorating gradually over time, which culminates in cell death. [GOC:BHF, GOC:dph, GOC:tb]	13	0.0131	7.84e-06	0.000586	SOX9, COMP, CCN1, CHST11, THBS1, ENO1, WNT4, ID1, LGALS3, IGF1R, HIP1R, BNIP3, HIGD1A

## Sheet: HC
Gene.Set.Name	Number of Genes in Gene Set (K)	Description	Number of Genes in Overlap (k)	k/K	p.value	FDR (q value)	genes
GOBP_SECRETION	1464	The controlled release of a substance by a cell or a tissue. [GOC:ai]	15	0.0102	4.01e-10	3e-06	HMOX1, LGALS3, LCN2, CTSD, SRGN, FFAR4, SGK1, VAMP8, ANXA3, SLPI, SRP14, F5, F13A1, SPP1, RBP4
GOBP_APOPTOTIC_PROCESS	1931	A programmed cell death process which begins when a cell receives an internal (e.g. DNA damage) or external signal (e.g. an extracellular death ligand), and proceeds through a series of biochemical events (signaling pathway phase) which trigger an execution phase. The execution phase is the last step of an apoptotic process, and is typically characterized by rounding-up of the cell, retraction of…	16	0.0083	1.99e-09	7.43e-06	HMOX1, LGALS3, LCN2, CTSD, SRGN, FFAR4, SGK1, NUPR1, CDKN1A, ITGA6, HSPB1, HERPUD1, GHITM, CHCHD10, ERO1A, ATF5
GOBP_APOPTOTIC_SIGNALING_PATHWAY	580	A series of molecular signals which triggers the apoptotic death of a cell. The pathway starts with reception of a signal, and ends when the execution phase of apoptosis is triggered. [GOC:mtg_apoptosis]	10	0.0172	3.94e-09	9.82e-06	HMOX1, LGALS3, NUPR1, CDKN1A, ITGA6, HSPB1, HERPUD1, GHITM, CHCHD10, ERO1A
GOBP_EXOCYTOSIS	891	A process of secretion by a cell that results in the release of intracellular molecules (e.g. hormones, matrix proteins) contained within a membrane-bounded vesicle. Exocytosis can occur either by full fusion, when the vesicle collapses into the plasma membrane, or by a kiss-and-run mechanism that involves the formation of a transient contact, a pore, between a granule (for exemple of chromaffin …	11	0.0123	1.89e-08	3.54e-05	HMOX1, LGALS3, LCN2, CTSD, SRGN, VAMP8, ANXA3, SLPI, SRP14, F5, F13A1
GOBP_RESPONSE_TO_TOXIC_SUBSTANCE	239	Any process that results in a change in state or activity of a cell or an organism (in terms of movement, secretion, enzyme production, gene expression, etc.) as a result of a toxic stimulus. [GOC:lr]	7	0.0293	2.88e-08	4.31e-05	NUPR1, CDKN1A, APOA4, PTGS2, GPX3, MT1X, MT1A
GOBP_DEFENSE_RESPONSE	1790	Reactions, triggered in response to the presence of a foreign body or the occurrence of an injury, which result in restriction of damage to the organism attacked or prevention/recovery from the infection caused by the attack. [GOC:go_curators]	14	0.0078	5.18e-08	5.95e-05	HMOX1, LGALS3, LCN2, FFAR4, VAMP8, ANXA3, SLPI, SPP1, NUPR1, APOA4, PTGS2, HTRA1, CXCL3, NT5E
GOBP_NEGATIVE_REGULATION_OF_CELL_DEATH	991	Any process that decreases the rate or frequency of cell death. Cell death is the specific activation or halting of processes within a cell so that its vital functions markedly cease, rather than simply deteriorating gradually over time, which culminates in cell death. [GOC:BHF, GOC:dph, GOC:tb]	11	0.0111	5.57e-08	5.95e-05	HMOX1, LGALS3, FFAR4, NUPR1, CDKN1A, ITGA6, HSPB1, HERPUD1, GHITM, ATF5, CDSN
GOBP_REGULATION_OF_CELL_DEATH	1659	Any process that modulates the rate or frequency of cell death. Cell death is the specific activation or halting of processes within a cell so that its vital functions markedly cease, rather than simply deteriorating gradually over time, which culminates in cell death. [GOC:dph, GOC:tb]	13	0.0078	1.67e-07	0.000156	HMOX1, LGALS3, CTSD, FFAR4, SGK1, NUPR1, CDKN1A, ITGA6, HSPB1, HERPUD1, GHITM, ATF5, CDSN
GOBP_REGULATION_OF_TRANSPORT	1730	Any process that modulates the frequency, rate or extent of the directed movement of substances (such as macromolecules, small molecules, ions) into, out of or within a cell, or between cells, by means of some agent such as a transporter or pore. [GOC:ai]	13	0.0075	2.7e-07	0.000225	HMOX1, LGALS3, FFAR4, SGK1, VAMP8, SPP1, RBP4, CHCHD10, APOA4, PLTP, FXYD5, FXYD3, TSPAN13
GOBP_REGULATION_OF_APOPTOTIC_SIGNALING_PATHWAY	348	Any process that modulates the frequency, rate or extent of apoptotic signaling pathway. [GOC:mtg_apoptosis]	7	0.0201	3.69e-07	0.000276	HMOX1, LGALS3, NUPR1, ITGA6, HSPB1, HERPUD1, GHITM
GOBP_NEGATIVE_REGULATION_OF_APOPTOTIC_SIGNALING_PATHWAY	224	Any process that stops, prevents or reduces the frequency, rate or extent of apoptotic signaling pathway. [GOC:mtg_apoptosis]	6	0.0268	5.08e-07	0.000346	HMOX1, LGALS3, ITGA6, HSPB1, HERPUD1, GHITM
GOBP_MYELOID_LEUKOCYTE_MEDIATED_IMMUNITY	550	Any process involved in the carrying out of an immune response by a myeloid leukocyte. [GO_REF:0000022, GOC:add, ISBN:0781735149]	8	0.0145	5.9e-07	0.000368	HMOX1, LGALS3, LCN2, CTSD, VAMP8, ANXA3, SLPI, SRP14
GOBP_EXTERNAL_ENCAPSULATING_STRUCTURE_ORGANIZATION	396	A process that is carried out at the cellular level which results in the assembly, arrangement of constituent parts, or disassembly of external structures that lie outside the plasma membrane and surround the entire cell. [GOC:ai, GOC:dph, GOC:jl, GOC:mah]	7	0.0177	8.75e-07	0.000471	SPP1, ITGA6, ERO1A, HTRA1, SMOC2, LOXL4, COL10A1
GOBP_POSITIVE_REGULATION_OF_ENDOTHELIAL_CELL_MIGRATION	132	Any process that increases the rate, frequency, or extent of the orderly movement of an endothelial cell into the extracellular matrix to form an endothelium. [GOC:BHF, GOC:dph, GOC:tb]	5	0.0379	8.82e-07	0.000471	HMOX1, ANXA3, HSPB1, PTGS2, SMOC2
GOBP_DETOXIFICATION	138	Any process that reduces or removes the toxicity of a toxic substance. These may include transport of the toxic substance away from sensitive areas and to compartments or complexes whose purpose is sequestration of the toxic substance. [GOC:dos]	5	0.0362	1.1e-06	0.000548	APOA4, PTGS2, GPX3, MT1X, MT1A
GOBP_RESPONSE_TO_LIPID	865	Any process that results in a change in state or activity of a cell or an organism (in terms of movement, secretion, enzyme production, gene expression, etc.) as a result of a lipid stimulus. [GOC:sl]	9	0.0104	1.76e-06	0.000823	SGK1, ANXA3, SLPI, SPP1, RBP4, CDKN1A, APOA4, GPX3, CXCL3
GOBP_INTRINSIC_APOPTOTIC_SIGNALING_PATHWAY	283	A series of molecular signals in which an intracellular signal is conveyed to trigger the apoptotic death of a cell. The pathway starts with reception of an intracellular signal (e.g. DNA damage, endoplasmic reticulum stress, oxidative stress etc.), and ends when the execution phase of apoptosis is triggered. The intrinsic apoptotic signaling pathway is crucially regulated by permeabilization of …	6	0.0212	1.98e-06	0.000869	HMOX1, NUPR1, CDKN1A, HSPB1, HERPUD1, ERO1A
GOBP_MYELOID_LEUKOCYTE_ACTIVATION	659	A change in the morphology or behavior of a myeloid leukocyte resulting from exposure to an activating factor such as a cellular or soluble ligand. [GOC:add, ISBN:0781735149]	8	0.0121	2.27e-06	0.000942	HMOX1, LGALS3, LCN2, CTSD, VAMP8, ANXA3, SLPI, SRP14
GOBP_POSITIVE_REGULATION_OF_EPITHELIAL_CELL_MIGRATION	175	Any process that activates or increases the frequency, rate or extent of epithelial cell migration. [GOC:BHF, GOC:dph, GOC:tb]	5	0.0286	3.53e-06	0.00139	HMOX1, ANXA3, HSPB1, PTGS2, SMOC2
GOBP_CELL_ACTIVATION_INVOLVED_IN_IMMUNE_RESPONSE	722	A change in the morphology or behavior of a cell resulting from exposure to an activating factor such as a cellular or soluble ligand, leading to the initiation or perpetuation of an immune response. [GO_REF:0000022, GOC:add, ISBN:0781735149]	8	0.0111	4.44e-06	0.00166	HMOX1, LGALS3, LCN2, CTSD, VAMP8, ANXA3, SLPI, SRP14
GOBP_HOMEOSTATIC_PROCESS	1912	Any biological process involved in the maintenance of an internal steady state. [GOC:jl, ISBN:0395825172]	12	0.0063	5.45e-06	0.00194	HMOX1, LCN2, FFAR4, SPP1, RBP4, HSPB1, HERPUD1, ERO1A, APOA4, PTGS2, MT1X, MT1A
GOBP_IMMUNE_EFFECTOR_PROCESS	1296	Any process of the immune system that can potentially contribute to an immune response. [GO_REF:0000022, GOC:add, ISBN:0781735149]	10	0.0077	6.31e-06	0.00215	HMOX1, LGALS3, LCN2, CTSD, VAMP8, ANXA3, SLPI, SRP14, RBP4, HTRA1
GOBP_REGULATION_OF_ION_TRANSPORT	1314	Any process that modulates the frequency, rate or extent of the directed movement of charged atoms or small charged molecules into, out of or within a cell, or between cells, by means of some agent such as a transporter or pore. [GOC:jl]	10	0.0076	7.12e-06	0.00227	LGALS3, FFAR4, VAMP8, SPP1, RBP4, APOA4, PLTP, FXYD5, FXYD3, TSPAN13
GOBP_INFLAMMATORY_RESPONSE	773	The immediate defensive reaction (by vertebrate tissue) to infection or injury caused by chemical or physical agents. The process is characterized by local vasodilation, extravasation of plasma into intercellular spaces and accumulation of white blood cells and macrophages. [GO_REF:0000022, ISBN:0198506732]	8	0.0103	7.29e-06	0.00227	HMOX1, FFAR4, VAMP8, SPP1, NUPR1, PTGS2, CXCL3, NT5E
GOBP_REGULATION_OF_RESPONSE_TO_EXTERNAL_STIMULUS	1036	Any process that modulates the frequency, rate or extent of a response to an external stimulus. [GOC:mah]	9	0.0087	7.59e-06	0.00227	FFAR4, VAMP8, SPP1, NUPR1, HSPB1, PTGS2, HTRA1, NT5E, SMOC2
GOBP_NEGATIVE_REGULATION_OF_RESPONSE_TO_STIMULUS	1673	Any process that stops, prevents, or reduces the frequency, rate or extent of a response to a stimulus. Response to stimulus is a change in state or activity of a cell or an organism (in terms of movement, secretion, enzyme production, gene expression, etc.) as a result of a stimulus. [GOC:jid]	11	0.0066	9.29e-06	0.00267	HMOX1, LGALS3, FFAR4, SPP1, ITGA6, HSPB1, HERPUD1, GHITM, HTRA1, NT5E, DDIT4L
GOBP_POSITIVE_REGULATION_OF_LOCOMOTION	585	Any process that activates or increases the frequency, rate or extent of locomotion of a cell or organism. [GOC:go_curators]	7	0.012	1.13e-05	0.00313	HMOX1, LGALS3, ANXA3, ITGA6, HSPB1, PTGS2, SMOC2
GOBP_REGULATION_OF_MULTICELLULAR_ORGANISMAL_DEVELOPMENT	1397	Any process that modulates the frequency, rate or extent of multicellular organismal development. [GOC:obol]	10	0.0072	1.21e-05	0.00324	HMOX1, LGALS3, SRGN, ANXA3, SPP1, RBP4, NUPR1, HSPB1, SMOC2, MGP
GOBP_REGULATION_OF_RESPONSE_TO_STRESS	1414	Any process that modulates the frequency, rate or extent of a response to stress. Response to stress is a change in state or activity of a cell or an organism (in terms of movement, secretion, enzyme production, gene expression, etc.) as a result of a disturbance in organismal or cellular homeostasis, usually, but not necessarily, exogenous (e.g. temperature, humidity, ionizing radiation). [GOC:d…	10	0.0071	1.35e-05	0.00338	FFAR4, VAMP8, SPP1, NUPR1, HSPB1, HERPUD1, PTGS2, HTRA1, NT5E, SMOC2
GOBP_REGULATION_OF_ENDOTHELIAL_CELL_MIGRATION	231	Any process that modulates the rate, frequency, or extent of the orderly movement of an endothelial cell into the extracellular matrix to form an endothelium. [GOC:BHF, GOC:dph, GOC:tb]	5	0.0216	1.36e-05	0.00338	HMOX1, ANXA3, HSPB1, PTGS2, SMOC2
GOBP_CELLULAR_RESPONSE_TO_CADMIUM_ION	38	Any process that results in a change in state or activity of a cell (in terms of movement, secretion, enzyme production, gene expression, etc.) as a result of a cadmium (Cd) ion stimulus. [GOC:mah]	3	0.0789	1.75e-05	0.00391	HMOX1, MT1X, MT1A
GOBP_LEUKOCYTE_MEDIATED_IMMUNITY	873	Any process involved in the carrying out of an immune response by a leukocyte. [GO_REF:0000022, GOC:add, ISBN:0781735149]	8	0.0092	1.75e-05	0.00391	HMOX1, LGALS3, LCN2, CTSD, VAMP8, ANXA3, SLPI, SRP14
GOBP_CELL_ACTIVATION	1461	A change in the morphology or behavior of a cell resulting from exposure to an activating factor such as a cellular or soluble ligand. [GOC:mgi_curators]	10	0.0068	1.78e-05	0.00391	HMOX1, LGALS3, LCN2, CTSD, VAMP8, ANXA3, SLPI, SRP14, CDKN1A, HSPB1
GOBP_NEGATIVE_REGULATION_OF_GROWTH	245	Any process that stops, prevents or reduces the rate or extent of growth, the increase in size or mass of all or part of an organism. [GOC:go_curators]	5	0.0204	1.8e-05	0.00391	SPP1, RBP4, CDKN1A, MT1X, MT1A
GOBP_CELLULAR_TRANSITION_METAL_ION_HOMEOSTASIS	118	Any process involved in the maintenance of an internal steady state of transition metal ions at the level of a cell. A transition metal is an element whose atom has an incomplete d-subshell of extranuclear electrons, or which gives rise to a cation or cations with an incomplete d-subshell. Transition metals often have more than one valency state. Biologically relevant transition metals include va…	4	0.0339	1.83e-05	0.00391	HMOX1, LCN2, MT1X, MT1A
GOBP_POSITIVE_REGULATION_OF_TRANSPORT	882	Any process that activates or increases the frequency, rate or extent of the directed movement of substances (such as macromolecules, small molecules, ions) into, out of or within a cell, or between cells, by means of some agent such as a transporter or pore. [GOC:ai]	8	0.0091	1.89e-05	0.00392	LGALS3, FFAR4, SGK1, VAMP8, SPP1, RBP4, CHCHD10, PLTP
GOBP_NEGATIVE_REGULATION_OF_MOLECULAR_FUNCTION	1167	Any process that stops or reduces the rate or extent of a molecular function, an elemental biological activity occurring at the molecular level, such as catalysis or binding. [GO:jl]	9	0.0077	1.95e-05	0.00395	HMOX1, LGALS3, ANXA3, SLPI, NUPR1, CDKN1A, HSPB1, HERPUD1, ANXA8L1
GOBP_METAL_ION_HOMEOSTASIS	647	Any process involved in the maintenance of an internal steady state of metal ions within an organism or cell. [GOC:ai, GOC:jid, GOC:mah]	7	0.0108	2.16e-05	0.00417	HMOX1, LCN2, FFAR4, HERPUD1, ERO1A, MT1X, MT1A
GOBP_POSITIVE_REGULATION_OF_HORMONE_SECRETION	124	Any process that activates or increases the frequency, rate or extent of the regulated release of a hormone from a cell. [GOC:ai]	4	0.0323	2.22e-05	0.00417	FFAR4, VAMP8, SPP1, RBP4
GOBP_CHEMICAL_HOMEOSTASIS	1187	Any biological process involved in the maintenance of an internal steady state of a chemical. [GOC:isa_complete]	9	0.0076	2.23e-05	0.00417	HMOX1, LCN2, FFAR4, RBP4, HERPUD1, ERO1A, APOA4, MT1X, MT1A
GOBP_RESPONSE_TO_WOUNDING	654	Any process that results in a change in state or activity of a cell or an organism (in terms of movement, secretion, enzyme production, gene expression, etc.) as a result of a stimulus indicating damage to the organism. [GOC:go_curators]	7	0.0107	2.31e-05	0.00422	HMOX1, F5, F13A1, SPP1, CDKN1A, HSPB1, SMOC2
GOBP_RESPONSE_TO_OXIDATIVE_STRESS	444	Any process that results in a change in state or activity of a cell or an organism (in terms of movement, secretion, enzyme production, gene expression, etc.) as a result of oxidative stress, a state often resulting from exposure to high levels of reactive oxygen species, e.g. superoxide anions, hydrogen peroxide (H2O2), and hydroxyl radicals. [GOC:jl, PMID:12115731]	6	0.0135	2.56e-05	0.00456	HMOX1, HSPB1, ERO1A, APOA4, PTGS2, GPX3
GOBP_CELLULAR_ION_HOMEOSTASIS	668	Any process involved in the maintenance of an internal steady state of ions at the level of a cell. [GOC:mah]	7	0.0105	2.65e-05	0.0046	HMOX1, LCN2, FFAR4, HERPUD1, ERO1A, MT1X, MT1A
GOBP_BROWN_FAT_CELL_DIFFERENTIATION	46	The process in which a relatively unspecialized cell acquires specialized features of a brown adipocyte, an animal connective tissue cell involved in adaptive thermogenesis. Brown adipocytes contain multiple small droplets of triglycerides and a high number of mitochondria. [PMID:12588810]	3	0.0652	3.13e-05	0.00532	FFAR4, ERO1A, PTGS2
GOBP_ENDOTHELIAL_CELL_MIGRATION	278	The orderly movement of an endothelial cell into the extracellular matrix to form an endothelium. [GOC:go_curators]	5	0.018	3.29e-05	0.00548	HMOX1, ANXA3, HSPB1, PTGS2, SMOC2
GOBP_TRANSITION_METAL_ION_HOMEOSTASIS	139	Any process involved in the maintenance of an internal steady state of transition metal ions within an organism or cell. A transition metal is an element whose atom has an incomplete d-subshell of extranuclear electrons, or which gives rise to a cation or cations with an incomplete d-subshell. Transition metals often have more than one valency state. Biologically relevant transition metals includ…	4	0.0288	3.48e-05	0.00565	HMOX1, LCN2, MT1X, MT1A
GOBP_REGULATION_OF_EPITHELIAL_CELL_MIGRATION	293	Any process that modulates the frequency, rate or extent of epithelial cell migration. [GOC:BHF, GOC:dph, GOC:tb]	5	0.0171	4.23e-05	0.00673	HMOX1, ANXA3, HSPB1, PTGS2, SMOC2
GOBP_CELLULAR_MACROMOLECULE_LOCALIZATION	1981	Any process in which a macromolecule is transported to, and/or maintained in, a specific location at the level of a cell. Localization at the cellular level encompasses movement within the cell, from within the cell to the cell surface, or from one location to another at the surface of a cell. [GOC:mah]	11	0.0056	4.43e-05	0.0069	LGALS3, SRGN, VAMP8, SRP14, CDKN1A, HSPB1, HERPUD1, CHCHD10, GRPEL1, NACAD, VAMP5
GOBP_RESPONSE_TO_OXYGEN_CONTAINING_COMPOUND	1654	Any process that results in a change in state or activity of a cell or an organism (in terms of movement, secretion, enzyme production, gene expression, etc.) as a result of an oxygen-containing compound stimulus. [GOC:pr, GOC:TermGenie]	10	0.006	5.12e-05	0.00781	HMOX1, SGK1, SLPI, SPP1, RBP4, CDKN1A, APOA4, GPX3, CXCL3, EIF4EBP1
GOBP_MULTICELLULAR_ORGANISMAL_HOMEOSTASIS	516	Any process involved in the maintenance of an internal steady state at the level of the multicellular organism. [GOC:isa_complete]	6	0.0116	5.89e-05	0.00881	LCN2, FFAR4, SPP1, RBP4, HSPB1, PTGS2
GOBP_WOUND_HEALING	535	The series of events that restore integrity to a damaged tissue, following an injury. [GOC:bf, PMID:15269788]	6	0.0112	7.19e-05	0.0105	HMOX1, F5, F13A1, CDKN1A, HSPB1, SMOC2
GOBP_RESPONSE_TO_CADMIUM_ION	61	Any process that results in a change in state or activity of a cell or an organism (in terms of movement, secretion, enzyme production, gene expression, etc.) as a result of a cadmium (Cd) ion stimulus. [GOC:ai]	3	0.0492	7.32e-05	0.0105	HMOX1, MT1X, MT1A
GOBP_ION_HOMEOSTASIS	787	Any process involved in the maintenance of an internal steady state of ions within an organism or cell. [GOC:ai]	7	0.0089	7.43e-05	0.0105	HMOX1, LCN2, FFAR4, HERPUD1, ERO1A, MT1X, MT1A
GOBP_TUBE_DEVELOPMENT	1085	The process whose specific outcome is the progression of a tube over time, from its initial formation to a mature structure. Epithelial and endothelial tubes transport gases, liquids and cells from one site to another and form the basic structure of many organs and tissues including lung and trachea, kidney, the mammary gland, the vascular system and the gastrointestinal and urinary-genital tract…	8	0.0074	8.13e-05	0.0113	HMOX1, ANXA3, RBP4, CDKN1A, HSPB1, PTGS2, SMOC2, EIF4EBP1
GOBP_NEGATIVE_REGULATION_OF_SIGNALING	1409	Any process that stops, prevents, or reduces the frequency, rate or extent of a signaling process. [GOC:mtg_signal]	9	0.0064	8.4e-05	0.0114	HMOX1, LGALS3, FFAR4, ITGA6, HSPB1, HERPUD1, GHITM, HTRA1, DDIT4L
GOBP_POSITIVE_REGULATION_OF_VASCULATURE_DEVELOPMENT	175	Any process that activates or increases the frequency, rate or extent of vasculature development. [GO_REF:0000058, GOC:TermGenie, PMID:21472453]	4	0.0229	8.51e-05	0.0114	HMOX1, ANXA3, HSPB1, SMOC2
GOBP_REGULATION_OF_CELLULAR_COMPONENT_MOVEMENT	1100	Any process that modulates the frequency, rate or extent of the movement of a cellular component. [GOC:ai, GOC:dph, GOC:jl]	8	0.0073	8.94e-05	0.0117	HMOX1, LGALS3, SGK1, ANXA3, ITGA6, HSPB1, PTGS2, SMOC2
GOBP_SKIN_MORPHOGENESIS	11	The process in which the anatomical structures of the skin are generated and organized. The skin is the external membranous integument of an animal. In vertebrates the skin generally consists of two layers, an outer nonsensitive and nonvascular epidermis (cuticle or skarfskin) composed of cells which are constantly growing and multiplying in the deeper, and being thrown off in the superficial lay…	2	0.1818	9.26e-05	0.0117	ITGA6, CDSN
GOBP_NEGATIVE_REGULATION_OF_CATALYTIC_ACTIVITY	816	Any process that stops or reduces the activity of an enzyme. [GOC:ebc, GOC:jl, GOC:tb, GOC:vw]	7	0.0086	9.31e-05	0.0117	LGALS3, ANXA3, SLPI, CDKN1A, HSPB1, HERPUD1, ANXA8L1
GOBP_CELLULAR_RESPONSE_TO_CHEMICAL_STRESS	347	Any process that results in a change in state or activity of a cell (in terms of movement, secretion, enzyme production, gene expression, etc.) as a result of a chemical stimulus indicating the organism is under stress. [PMID:26653712]	5	0.0144	9.39e-05	0.0117	HMOX1, HSPB1, ERO1A, APOA4, GPX3
GOBP_TISSUE_MIGRATION	365	The process in which the population of cells that make up a tissue undergo directed movement. [GOC:ascb_2009, GOC:dph, GOC:tb]	5	0.0137	0.000119	0.0144	HMOX1, ANXA3, HSPB1, PTGS2, SMOC2
GOBP_REGULATION_OF_INFLAMMATORY_RESPONSE	366	Any process that modulates the frequency, rate or extent of the inflammatory response, the immediate defensive reaction (by vertebrate tissue) to infection or injury caused by chemical or physical agents. [GOC:ai]	5	0.0137	0.00012	0.0144	FFAR4, VAMP8, NUPR1, PTGS2, NT5E
GOBP_REGENERATION	192	The regrowth of a lost or destroyed body part, such as an organ or tissue. This process may occur via renewal, repair, and/or growth alone (i.e. increase in size or mass). [GOC:mah, GOC:pr]	4	0.0208	0.000122	0.0144	HMOX1, ANXA3, SPP1, CDKN1A
GOBP_ANIMAL_ORGAN_REGENERATION	73	The regrowth of a lost or destroyed animal organ. [GOC:mah]	3	0.0411	0.000125	0.0144	HMOX1, ANXA3, CDKN1A
GOBP_CATION_TRANSPORT	1155	The directed movement of cations, atoms or small molecules with a net positive charge, into, out of or within a cell, or between cells, by means of some agent such as a transporter or pore. [GOC:ai]	8	0.0069	0.000125	0.0144	LGALS3, LCN2, SGK1, VAMP8, ERO1A, FXYD5, FXYD3, TSPAN13
GOBP_POSITIVE_REGULATION_OF_BLOOD_VESSEL_ENDOTHELIAL_CELL_MIGRATION	75	Any process that activates or increases the frequency, rate or extent of the migration of the endothelial cells of blood vessels. [GOC:go_curators]	3	0.04	0.000136	0.0154	HMOX1, HSPB1, PTGS2
GOBP_CELL_CELL_ADHESION	880	The attachment of one cell to another cell via adhesion molecules. [GOC:dos]	7	0.008	0.000148	0.0164	LGALS3, ITGA6, HSPB1, APOA4, NT5E, CDSN, FXYD5
GOBP_RESPONSE_TO_OXYGEN_LEVELS	384	Any process that results in a change in state or activity of a cell or an organism (in terms of movement, secretion, enzyme production, gene expression, etc.) as a result of a stimulus reflecting the presence, absence, or concentration of oxygen. [GOC:BHF, GOC:mah]	5	0.013	0.000151	0.0164	HMOX1, CDKN1A, ERO1A, PTGS2, EIF4EBP1
GOBP_REGULATION_OF_SECRETION	613	Any process that modulates the frequency, rate or extent of the controlled release of a substance from a cell or a tissue. [GOC:ai]	6	0.0098	0.000151	0.0164	HMOX1, FFAR4, SGK1, VAMP8, SPP1, RBP4
GOBP_FIBROBLAST_PROLIFERATION	80	The multiplication or reproduction of fibroblast cells, resulting in the expansion of the fibroblast population. [GOC:jid]	3	0.0375	0.000164	0.0175	NUPR1, CDKN1A, S100A6
GOBP_MAINTENANCE_OF_LOCATION_IN_CELL	209	Any process in which a substance or cellular entity, such as a protein complex or organelle, is maintained in a specific location within, or in the membrane of, a cell, and is prevented from moving elsewhere. [GOC:ai]	4	0.0191	0.000168	0.0178	LCN2, SRGN, CHCHD10, ERO1A
GOBP_POSITIVE_REGULATION_OF_ENDOTHELIAL_CELL_CHEMOTAXIS	15	Any process that activates or increases the frequency, rate or extent of endothelial cell chemotaxis. [GOC:BHF]	2	0.1333	0.000176	0.0183	HSPB1, SMOC2
GOBP_GROWTH	908	The increase in size or mass of an entire organism, a part of an organism or a cell. [GOC:bf, GOC:ma]	7	0.0077	0.00018	0.0184	SGK1, SPP1, RBP4, CDKN1A, ATF5, MT1X, MT1A
GOBP_REGULATION_OF_GROWTH	644	Any process that modulates the frequency, rate or extent of the growth of all or part of an organism so that it occurs at its proper speed, either globally or in a specific part of the organism's development. [GOC:ems, GOC:mah]	6	0.0093	0.000197	0.0199	SGK1, SPP1, RBP4, CDKN1A, MT1X, MT1A
GOBP_POSITIVE_REGULATION_OF_BROWN_FAT_CELL_DIFFERENTIATION	16	Any process that increases the rate, frequency, or extent of brown fat cell differentiation. Brown fat cell differentiation is the process in which a relatively unspecialized cell acquires specialized features of a brown adipocyte, an animal connective tissue cell involved in adaptive thermogenesis. Brown adipocytes contain multiple small droplets of triglycerides and a high number of mitochondri…	2	0.125	0.000201	0.0201	FFAR4, PTGS2
GOBP_FAT_CELL_DIFFERENTIATION	221	The process in which a relatively unspecialized cell acquires specialized features of an adipocyte, an animal connective tissue cell specialized for the synthesis and storage of fat. [CL:0000136, GOC:go_curators]	4	0.0181	0.000209	0.0203	FFAR4, ERO1A, ATF5, PTGS2
GOBP_CELLULAR_HOMEOSTASIS	937	Any process involved in the maintenance of an internal steady state at the level of the cell. [GOC:isa_complete, GOC:jl, ISBN:0395825172]	7	0.0075	0.000218	0.0203	HMOX1, LCN2, FFAR4, HERPUD1, ERO1A, MT1X, MT1A
GOBP_LOCOMOTION	1975	Self-propelled movement of a cell or organism from one location to another. [GOC:dgh]	10	0.0051	0.00022	0.0203	HMOX1, LGALS3, SGK1, ANXA3, ITGA6, HSPB1, PTGS2, CXCL3, PLTP, SMOC2
GOBP_CELL_MIGRATION	1602	The controlled self-propelled movement of a cell from one site to a destination guided by molecular cues. Cell migration is a central process in the development and maintenance of multicellular organisms. [GOC:cjm, GOC:dph, GOC:ems, GOC:pf, Wikipedia:Cell_migration]	9	0.0056	0.000221	0.0203	HMOX1, LGALS3, SGK1, ANXA3, ITGA6, HSPB1, PTGS2, CXCL3, SMOC2
GOBP_POSITIVE_REGULATION_OF_ION_TRANSPORT	659	Any process that activates or increases the frequency, rate or extent of the directed movement of charged atoms or small charged molecules into, out of or within a cell, or between cells, by means of some agent such as a transporter or pore. [GOC:jl]	6	0.0091	0.000223	0.0203	LGALS3, FFAR4, VAMP8, SPP1, RBP4, PLTP
GOBP_RESPONSE_TO_BIOTIC_STIMULUS	1606	Any process that results in a change in state or activity of a cell or an organism (in terms of movement, secretion, enzyme production, gene expression, etc.) as a result of a biotic stimulus, a stimulus caused or produced by a living organism. [GOC:hb]	9	0.0056	0.000225	0.0203	LGALS3, LCN2, VAMP8, ANXA3, SLPI, HSPB1, APOA4, HTRA1, CXCL3
GOBP_ESTABLISHMENT_OF_PROTEIN_LOCALIZATION	1982	The directed movement of a protein to a specific location. [GOC:bf]	10	0.005	0.000226	0.0203	CTSD, VAMP8, SRP14, RBP4, CDKN1A, HSPB1, HERPUD1, GRPEL1, NACAD, VAMP5
GOBP_DETOXIFICATION_OF_INORGANIC_COMPOUND	17	Any process that reduces or removes the toxicity of inorganic compounds. These include transport of such compounds away from sensitive areas and to compartments or complexes whose purpose is sequestration of inorganic compounds. [GOC:vw]	2	0.1176	0.000228	0.0203	MT1X, MT1A
GOBP_RESPONSE_TO_HYDROPEROXIDE	17	Any process that results in a change in state or activity of a cell or an organism (in terms of movement, secretion, enzyme production, gene expression, etc.) as a result of a hydroperoxide stimulus. Hydroperoxides are monosubstitution products of hydrogen peroxide, HOOH. [GOC:mah]	2	0.1176	0.000228	0.0203	APOA4, GPX3
GOBP_MEMBRANE_ORGANIZATION	949	A process which results in the assembly, arrangement of constituent parts, or disassembly of a membrane. A membrane is a double layer of lipid molecules that encloses all cells, and, in eukaryotes, many organelles; may be a single or double lipid bilayer; also includes associated proteins. [GOC:dph, GOC:tb]	7	0.0074	0.000235	0.0207	VAMP8, F5, GHITM, CHCHD10, APOA4, PLTP, TGOLN2
GOBP_CELLULAR_RESPONSE_TO_OXYGEN_LEVELS	230	Any process that results in a change in state or activity of a cell (in terms of movement, secretion, enzyme production, gene expression, etc.) as a result of a stimulus reflecting the presence, absence, or concentration of oxygen. [GOC:mah]	4	0.0174	0.000243	0.0211	HMOX1, ERO1A, PTGS2, EIF4EBP1
GOBP_RESPONSE_TO_ALCOHOL	233	Any process that results in a change in state or activity of a cell or an organism (in terms of movement, secretion, enzyme production, gene expression, etc.) as a result of an alcohol stimulus. [GOC:pr, PMID:24014527]	4	0.0172	0.000255	0.0215	SGK1, RBP4, CDKN1A, EIF4EBP1
GOBP_HIGH_DENSITY_LIPOPROTEIN_PARTICLE_REMODELING	18	The acquisition, loss or modification of a protein or lipid within a high-density lipoprotein particle, including the hydrolysis of triglyceride by hepatic lipase, with the subsequent loss of free fatty acid, and the transfer of cholesterol esters from LDL to a triglyceride-rich lipoprotein particle by cholesteryl ester transfer protein (CETP), with the simultaneous transfer of triglyceride to LD…	2	0.1111	0.000256	0.0215	APOA4, PLTP
GOBP_STRESS_RESPONSE_TO_METAL_ION	18	Any process that results in a change in state or activity of a cell or an organism (in terms of movement, secretion, enzyme production, gene expression, etc.) as a result of a disturbance in organismal or cellular homeostasis caused by a metal ion stimulus. [GOC:kmv]	2	0.1111	0.000256	0.0215	MT1X, MT1A
GOBP_REGULATION_OF_DEFENSE_RESPONSE	692	Any process that modulates the frequency, rate or extent of a defense response. [GOC:mah]	6	0.0087	0.00029	0.0241	FFAR4, VAMP8, NUPR1, PTGS2, HTRA1, NT5E
GOBP_DIGESTIVE_SYSTEM_PROCESS	99	A physical, chemical, or biochemical process carried out by living organisms to break down ingested nutrients into components that may be easily absorbed and directed into metabolism. [GOC:isa_complete, GOC:jid, GOC:mtg_cardio]	3	0.0303	0.000308	0.0253	SGK1, RBP4, APOA4
GOBP_INTRINSIC_APOPTOTIC_SIGNALING_PATHWAY_IN_RESPONSE_TO_DNA_DAMAGE	100	A series of molecular signals in which an intracellular signal is conveyed to trigger the apoptotic death of a cell. The pathway is induced by the detection of DNA damage, and ends when the execution phase of apoptosis is triggered. [GOC:go_curators, GOC:mtg_apoptosis]	3	0.03	0.000317	0.0258	HMOX1, NUPR1, CDKN1A
GOBP_REGULATION_OF_PLASMA_LIPOPROTEIN_PARTICLE_LEVELS	101	Any process involved in the maintenance of internal levels of plasma lipoprotein particles within an organism. [GOC:BHF]	3	0.0297	0.000326	0.0263	HMOX1, APOA4, PLTP
GOBP_CELLULAR_OXIDANT_DETOXIFICATION	102	Any process carried out at the cellular level that reduces or removes the toxicity superoxide radicals or hydrogen peroxide. [GOC:dos, GOC:vw]	3	0.0294	0.000336	0.0267	APOA4, PTGS2, GPX3
GOBP_NEGATIVE_REGULATION_OF_EXTRINSIC_APOPTOTIC_SIGNALING_PATHWAY	103	Any process that stops, prevents or reduces the frequency, rate or extent of extrinsic apoptotic signaling pathway. [GOC:mtg_apoptosis]	3	0.0291	0.000346	0.0272	HMOX1, LGALS3, ITGA6
GOBP_REGULATION_OF_IMMUNE_EFFECTOR_PROCESS	464	Any process that modulates the frequency, rate, or extent of an immune effector process. [GOC:add]	5	0.0108	0.00036	0.0281	HMOX1, LGALS3, VAMP8, RBP4, HTRA1
GOBP_NEGATIVE_REGULATION_OF_CELLULAR_COMPONENT_ORGANIZATION	729	Any process that stops, prevents, or reduces the frequency, rate or extent of a process involved in the formation, arrangement of constituent parts, or disassembly of cell structures, including the plasma membrane and any external encapsulating structures such as the cell wall and cell envelope. [GOC:ai]	6	0.0082	0.000382	0.0289	LGALS3, SPP1, NUPR1, GHITM, APOA4, EIF4EBP1
GOBP_REGULATION_OF_BROWN_FAT_CELL_DIFFERENTIATION	22	Any process that modulates the rate, frequency, or extent of brown fat cell differentiation. Brown fat cell differentiation is the process in which a relatively unspecialized cell acquires specialized features of a brown adipocyte, an animal connective tissue cell involved in adaptive thermogenesis. Brown adipocytes contain multiple small droplets of triglycerides and a high number of mitochondri…	2	0.0909	0.000385	0.0289	FFAR4, PTGS2
GOBP_REGULATION_OF_HORMONE_SECRETION	260	Any process that modulates the frequency, rate or extent of the regulated release of a hormone from a cell. [GOC:ai]	4	0.0154	0.000386	0.0289	FFAR4, VAMP8, SPP1, RBP4
GOBP_NEGATIVE_REGULATION_OF_DEVELOPMENTAL_GROWTH	107	Any process that stops, prevents, or reduces the frequency, rate or extent of developmental growth. [GOC:go_curators]	3	0.028	0.000387	0.0289	SPP1, RBP4, CDKN1A

## Sheet: imOb
Gene.Set.Name	Number of Genes in Gene Set (K)	Description	Number of Genes in Overlap (k)	k/K	p.value	FDR (q value)	genes
GOBP_EXTERNAL_ENCAPSULATING_STRUCTURE_ORGANIZATION	396	A process that is carried out at the cellular level which results in the assembly, arrangement of constituent parts, or disassembly of external structures that lie outside the plasma membrane and surround the entire cell. [GOC:ai, GOC:dph, GOC:jl, GOC:mah]	43	0.1086	5.95e-48	4.45e-44	MMP14, RUNX1, LOX, ADAMTS9, ADAM12, ADAMTS1, CREB3L1, COL4A2, FBN1, FAP, MMP2, COL4A1, COL22A1, COL5A1, ANTXR1, COL3A1, VCAM1, LOXL1, SH3PXD2B, SPP1, GAS6, MMP9, CTSK, CTSV, DMP1, BMP1, TNC, ADAMTS2, POSTN, FBLN1, COL5A2, TIMP2, VCAN, IBSP, COL12A1, MMP13, MFAP2, ADAMTS5, KAZALD1, LUM, QSOX1, MMP23B, OLFML2A
GOBP_CIRCULATORY_SYSTEM_DEVELOPMENT	1140	The process whose specific outcome is the progression of the circulatory system over time, from its formation to the mature structure. The circulatory system is the organ system that passes nutrients (such as amino acids and electrolytes), gases, hormones, blood cells, etc. to and from cells in the body to help fight diseases and help stabilize body temperature and pH to maintain homeostasis. [GO…	50	0.0439	1.83e-36	6.84e-33	MMP14, RUNX1, LOX, ADAMTS9, ADAM12, ADAMTS1, CREB3L1, COL4A2, FBN1, FAP, MMP2, COL4A1, COL22A1, COL5A1, ANTXR1, COL3A1, VCAM1, LOXL1, SH3PXD2B, MDK, PTN, SOX4, ANXA1, ZFP36L1, TWIST1, FGFR2, SLIT2, SERPINF1, JUN, GJA1, SRPX2, BASP1, ANGPTL4, IGF1, FLNA, CDH2, CCL2, NRP2, PDGFRB, PRRX1, APOE, LEPR, HPGD, EPAS1, CALD1, SOCS3, TPM1, FHL2, SLIT3, BICC1
GOBP_REGULATION_OF_MULTICELLULAR_ORGANISMAL_DEVELOPMENT	1397	Any process that modulates the frequency, rate or extent of multicellular organismal development. [GOC:obol]	52	0.0372	1.73e-34	4.32e-31	MMP14, RUNX1, LOX, ADAMTS9, ADAM12, ADAMTS1, CREB3L1, COL4A2, FBN1, SPP1, GAS6, MMP9, CTSK, CTSV, DMP1, BMP1, MDK, PTN, SOX4, ANXA1, ZFP36L1, TWIST1, FGFR2, SLIT2, SERPINF1, JUN, GJA1, SRPX2, BASP1, ANGPTL4, IGF1, CSF1, SERPINE2, PLXNA2, MME, TNFSF11, BGLAP, CXCL12, KITLG, PTPRD, PTPRS, PRDX2, MYL9, TMEM176B, B2M, S1PR3, ZFP36L2, HLA-B, TMEM176A, IFITM5, ASPN, CTSC
GOBP_TUBE_DEVELOPMENT	1085	The process whose specific outcome is the progression of a tube over time, from its initial formation to a mature structure. Epithelial and endothelial tubes transport gases, liquids and cells from one site to another and form the basic structure of many organs and tissues including lung and trachea, kidney, the mammary gland, the vascular system and the gastrointestinal and urinary-genital tract…	47	0.0433	6.02e-34	1.13e-30	MMP14, RUNX1, LOX, ADAMTS9, ADAM12, ADAMTS1, CREB3L1, COL4A2, FAP, MMP2, COL4A1, COL22A1, TNC, ADAMTS2, MDK, PTN, SOX4, ANXA1, ZFP36L1, TWIST1, FGFR2, SLIT2, SERPINF1, JUN, GJA1, SRPX2, BASP1, ANGPTL4, FLNA, CDH2, CCL2, NRP2, PDGFRB, PRRX1, APOE, LEPR, HPGD, EPAS1, CALD1, CSF1, SERPINE2, PLXNA2, MME, CTHRC1, IGFBP5, PHEX, NFIB
GOBP_REGULATION_OF_CELL_DIFFERENTIATION	1618	Any process that modulates the frequency, rate or extent of cell differentiation, the process in which relatively unspecialized cells acquire specialized structural and functional features. [GOC:go_curators]	54	0.0334	1.68e-33	2.51e-30	MMP14, RUNX1, LOX, FBN1, COL5A1, SPP1, GAS6, MMP9, CTSK, CTSV, POSTN, FBLN1, COL5A2, TIMP2, MDK, PTN, SOX4, ANXA1, ZFP36L1, TWIST1, FGFR2, SLIT2, SERPINF1, JUN, GJA1, IGF1, FLNA, CDH2, SOCS3, CSF1, SERPINE2, PLXNA2, MME, TNFSF11, BGLAP, CXCL12, KITLG, PTPRD, PTPRS, PRDX2, MYL9, TMEM176B, B2M, S1PR3, ZFP36L2, HLA-B, TMEM176A, CTHRC1, IGFBP5, FGFR1, ZEB2, LPL, METRNL, WIF1
GOBP_BIOLOGICAL_ADHESION	1481	The attachment of a cell or organism to a substrate, another cell, or other organism. Biological adhesion includes intracellular attachment between membrane regions. [GOC:isa_complete]	50	0.0338	4.06e-31	5.07e-28	MMP14, RUNX1, ADAMTS9, ADAM12, FBN1, FAP, COL5A1, ANTXR1, COL3A1, VCAM1, SPP1, GAS6, DMP1, TNC, POSTN, FBLN1, VCAN, IBSP, COL12A1, MDK, PTN, SOX4, ANXA1, ZFP36L1, SRPX2, IGF1, FLNA, CDH2, CCL2, NRP2, TPM1, CSF1, SERPINE2, PLXNA2, TNFSF11, BGLAP, CXCL12, KITLG, PTPRD, PTPRS, PRDX2, MYL9, CDH11, MAP4K4, PALLD, LIMCH1, FAT1, GSN, LGALS1, MXRA8
GOBP_ANIMAL_ORGAN_MORPHOGENESIS	1025	Morphogenesis of an animal organ. An organ is defined as a tissue or set of tissues that work together to perform a specific function or functions. Morphogenesis is the process in which anatomical structures are generated and organized. Organs are commonly observed as visibly distinct structures, but may also exist as loosely associated clusters of cells that work together to perform a specific f…	43	0.042	2.08e-30	2.23e-27	MMP14, ADAMTS1, FBN1, MMP2, COL5A1, DMP1, BMP1, TNC, COL5A2, MMP13, MFAP2, ADAMTS5, MDK, PTN, SOX4, TWIST1, FGFR2, SLIT2, BASP1, FLNA, CDH2, CCL2, NRP2, PDGFRB, PRRX1, TPM1, FHL2, SLIT3, CSF1, TNFSF11, BGLAP, TMEM176B, IFITM5, ASPN, CTHRC1, IGFBP5, PHEX, NFIB, FGFR1, SATB2, ALPL, TLE5, FOXN3
GOBP_VASCULATURE_DEVELOPMENT	786	The process whose specific outcome is the progression of the vasculature over time, from its formation to the mature structure. The vasculature is an interconnected tubular multi-tissue structure that contains fluid that is actively transported around the organism. [GOC:dph, UBERON:0002409]	39	0.0496	3.06e-30	2.86e-27	MMP14, RUNX1, LOX, ADAMTS9, ADAM12, ADAMTS1, CREB3L1, COL4A2, FAP, MMP2, COL4A1, COL22A1, COL5A1, ANTXR1, LOXL1, MDK, PTN, SOX4, ANXA1, ZFP36L1, TWIST1, FGFR2, SLIT2, SERPINF1, JUN, SRPX2, ANGPTL4, FLNA, CDH2, CCL2, NRP2, PDGFRB, PRRX1, APOE, LEPR, HPGD, EPAS1, CALD1, SOCS3
GOBP_OSSIFICATION	399	The formation of bone or of a bony substance, or the conversion of fibrous tissue or of cartilage into bone or a bony substance. [GOC:mtg_mpo, PMID:17572649]	31	0.0777	5.93e-30	4.93e-27	MMP14, RUNX1, LOX, CREB3L1, MMP2, SPP1, MMP9, DMP1, BMP1, TNC, COL5A2, VCAN, IBSP, KAZALD1, MDK, PTN, TWIST1, FGFR2, IGF1, FHL2, CSF1, TNFSF11, BGLAP, IFITM5, ASPN, CTHRC1, IGFBP5, PHEX, CDH11, SATB2, ALPL
GOBP_BLOOD_VESSEL_MORPHOGENESIS	677	The process in which the anatomical structures of blood vessels are generated and organized. The blood vessel is the vasculature carrying blood. [GOC:jid]	35	0.0517	9.97e-28	7.46e-25	MMP14, RUNX1, LOX, ADAMTS9, ADAM12, ADAMTS1, CREB3L1, COL4A2, FAP, MMP2, COL4A1, COL22A1, MDK, PTN, SOX4, ANXA1, ZFP36L1, TWIST1, FGFR2, SLIT2, SERPINF1, JUN, SRPX2, ANGPTL4, FLNA, CDH2, CCL2, NRP2, PDGFRB, PRRX1, APOE, LEPR, HPGD, EPAS1, CALD1
GOBP_CELL_MIGRATION	1602	The controlled self-propelled movement of a cell from one site to a destination guided by molecular cues. Cell migration is a central process in the development and maintenance of multicellular organisms. [GOC:cjm, GOC:dph, GOC:ems, GOC:pf, Wikipedia:Cell_migration]	48	0.03	1.57e-27	1.07e-24	MMP14, LOX, ADAMTS9, ADAMTS1, FAP, COL5A1, COL3A1, VCAM1, GAS6, MMP9, POSTN, MDK, PTN, ANXA1, TWIST1, SLIT2, SERPINF1, GJA1, SRPX2, IGF1, FLNA, CDH2, CCL2, NRP2, PDGFRB, APOE, TPM1, CSF1, SERPINE2, PLXNA2, TNFSF11, CXCL12, KITLG, CTHRC1, IGFBP5, FGFR1, ZEB2, MAP4K4, PALLD, LIMCH1, FAT1, SATB2, DPYSL3, SDC2, FSTL1, DAPK2, TMSB4X, PROS1
GOBP_SKELETAL_SYSTEM_DEVELOPMENT	485	The process whose specific outcome is the progression of the skeleton over time, from its formation to the mature structure. The skeleton is the bony framework of the body in vertebrates (endoskeleton) or the hard outer envelope of insects (exoskeleton or dermoskeleton). [GOC:dph, GOC:jid, GOC:tb]	31	0.0639	2.34e-27	1.46e-24	MMP14, RUNX1, LOX, FBN1, MMP2, COL3A1, SH3PXD2B, MMP9, BMP1, COL5A2, VCAN, MMP13, LUM, MDK, SOX4, TWIST1, FGFR2, GJA1, IGF1, PRRX1, TNFSF11, BGLAP, IFITM5, PHEX, NFIB, FGFR1, CDH11, SATB2, ALPL, TLE5, FOXN3
GOBP_TUBE_MORPHOGENESIS	900	The process in which the anatomical structures of a tube are generated and organized. Epithelial and endothelial tubes transport gases, liquids and cells from one site to another and form the basic structure of many organs and tissues, with tube shape and organization varying from the single-celled excretory organ in Caenorhabditis elegans to the branching trees of the mammalian kidney and insect…	38	0.0422	6.35e-27	3.66e-24	MMP14, RUNX1, LOX, ADAMTS9, ADAM12, ADAMTS1, CREB3L1, COL4A2, FAP, MMP2, COL4A1, COL22A1, TNC, MDK, PTN, SOX4, ANXA1, ZFP36L1, TWIST1, FGFR2, SLIT2, SERPINF1, JUN, SRPX2, ANGPTL4, FLNA, CDH2, CCL2, NRP2, PDGFRB, PRRX1, APOE, LEPR, HPGD, EPAS1, CALD1, CSF1, CTHRC1
GOBP_NEUROGENESIS	1613	Generation of cells within the nervous system. [GO_REF:0000021, GOC:cls, GOC:curators, GOC:dgh, GOC:dph, GOC:jid]	47	0.0291	2.04e-26	1.09e-23	MMP14, RUNX1, COL3A1, VCAM1, SPP1, GAS6, TNC, POSTN, TIMP2, MDK, PTN, SOX4, ANXA1, TWIST1, FGFR2, SLIT2, SERPINF1, GJA1, FLNA, CDH2, CCL2, NRP2, PRRX1, APOE, LEPR, SLIT3, CSF1, SERPINE2, PLXNA2, MME, CXCL12, PTPRD, PTPRS, B2M, CTHRC1, NFIB, FGFR1, CDH11, MAP4K4, PALLD, GSN, LGALS1, MXRA8, SATB2, DPYSL3, SDC2, STMN1
GOBP_LOCOMOTION	1975	Self-propelled movement of a cell or organism from one location to another. [GOC:dgh]	51	0.0258	2.34e-26	1.17e-23	MMP14, LOX, ADAMTS9, ADAMTS1, FAP, COL5A1, COL3A1, VCAM1, GAS6, MMP9, POSTN, FBLN1, MDK, PTN, ANXA1, TWIST1, SLIT2, SERPINF1, GJA1, SRPX2, IGF1, FLNA, CDH2, CCL2, NRP2, PDGFRB, APOE, TPM1, SLIT3, CSF1, SERPINE2, PLXNA2, TNFSF11, CXCL12, KITLG, CTHRC1, IGFBP5, NFIB, FGFR1, ZEB2, MAP4K4, PALLD, LIMCH1, FAT1, SATB2, DPYSL3, SDC2, FSTL1, DAPK2, TMSB4X, PROS1
GOBP_CELL_POPULATION_PROLIFERATION	1955	The multiplication or reproduction of cells, resulting in the expansion of a cell population. [GOC:mah, GOC:mb]	50	0.0256	1.26e-25	5.9e-23	MMP14, RUNX1, ADAMTS1, FAP, MMP2, VCAM1, GAS6, MMP9, TNC, FBLN1, TIMP2, MDK, PTN, SOX4, ANXA1, ZFP36L1, TWIST1, FGFR2, SERPINF1, JUN, GJA1, IGF1, FLNA, CDH2, CCL2, NRP2, PDGFRB, PRRX1, APOE, LEPR, HPGD, TPM1, SLIT3, CSF1, SERPINE2, TNFSF11, CXCL12, KITLG, PRDX2, B2M, S1PR3, CTHRC1, IGFBP5, NFIB, FGFR1, PLAC8, IGFBP4, LIFR, CKS2, OGN
GOBP_ANATOMICAL_STRUCTURE_FORMATION_INVOLVED_IN_MORPHOGENESIS	1142	The developmental process pertaining to the initial formation of an anatomical structure from unspecified parts. This process begins with the specific processes that contribute to the appearance of the discrete structure and ends when the structural rudiment is recognizable. An anatomical structure is any biological entity that occupies space and is distinguished from its surroundings. Anatomical…	39	0.0342	2.77e-24	1.22e-21	MMP14, RUNX1, ADAMTS9, ADAM12, ADAMTS1, CREB3L1, COL4A2, FAP, MMP2, COL4A1, COL22A1, COL5A1, MMP9, DMP1, COL5A2, COL12A1, MDK, PTN, SOX4, ANXA1, TWIST1, FGFR2, SLIT2, SERPINF1, JUN, GJA1, SRPX2, ANGPTL4, FLNA, CCL2, NRP2, PDGFRB, LEPR, EPAS1, CALD1, TPM1, FHL2, PLXNA2, CTHRC1
GOBP_POSITIVE_REGULATION_OF_DEVELOPMENTAL_PROCESS	1284	Any process that activates or increases the rate or extent of development, the biological process whose specific outcome is the progression of an organism over time from an initial condition (e.g. a zygote, or a young adult) to a later condition (e.g. a multicellular animal or an aged adult). [GOC:ai]	40	0.0312	1.89e-23	7.87e-21	MMP14, RUNX1, ADAM12, GAS6, BMP1, TIMP2, MDK, PTN, SOX4, ANXA1, ZFP36L1, TWIST1, FGFR2, SLIT2, SERPINF1, JUN, GJA1, SRPX2, BASP1, ANGPTL4, IGF1, FLNA, CDH2, APOE, SOCS3, CSF1, SERPINE2, PLXNA2, MME, TNFSF11, CXCL12, KITLG, PTPRD, B2M, CTHRC1, FGFR1, ZEB2, LPL, METRNL, WIF1
GOBP_RESPONSE_TO_ENDOGENOUS_STIMULUS	1624	Any process that results in a change in state or activity of a cell or an organism (in terms of movement, secretion, enzyme production, gene expression, etc.) as a result of a stimulus arising within the organism. [GOC:sm]	44	0.0271	2e-23	7.88e-21	MMP14, RUNX1, LOX, CREB3L1, COL4A2, FBN1, MMP2, COL4A1, COL3A1, VCAM1, SPP1, TNC, POSTN, COL5A2, TIMP2, PTN, ANXA1, ZFP36L1, FGFR2, SLIT2, SERPINF1, JUN, GJA1, IGF1, FLNA, CCL2, PDGFRB, APOE, LEPR, HPGD, SOCS3, FHL2, SLIT3, BGLAP, CXCL12, ZFP36L2, ASPN, IGFBP5, PHEX, FGFR1, LPL, ALPL, FSTL1, PAPPA
GOBP_REGULATION_OF_CELLULAR_COMPONENT_MOVEMENT	1100	Any process that modulates the frequency, rate or extent of the movement of a cellular component. [GOC:ai, GOC:dph, GOC:jl]	36	0.0327	8.41e-22	3.15e-19	MMP14, ADAMTS9, ADAMTS1, COL3A1, GAS6, MMP9, POSTN, FBLN1, MDK, PTN, ANXA1, TWIST1, SLIT2, SERPINF1, GJA1, SRPX2, IGF1, FLNA, CCL2, NRP2, PDGFRB, APOE, TPM1, CSF1, SERPINE2, PLXNA2, CXCL12, KITLG, IGFBP5, FGFR1, MAP4K4, LIMCH1, DPYSL3, DAPK2, TMSB4X, STMN1
GOBP_GROWTH	908	The increase in size or mass of an entire organism, a part of an organism or a cell. [GOC:bf, GOC:ma]	33	0.0363	2.19e-21	7.82e-19	MMP14, RUNX1, SPP1, GAS6, TNC, POSTN, KAZALD1, MDK, PTN, ANXA1, ZFP36L1, FGFR2, SLIT2, GJA1, BASP1, IGF1, NRP2, PDGFRB, APOE, LEPR, SOCS3, SLIT3, CSF1, SERPINE2, CXCL12, PTPRS, IGFBP5, GSN, TLE5, PLAC8, IGFBP4, GAS1, RASGRP2
GOBP_POSITIVE_REGULATION_OF_CELL_DIFFERENTIATION	844	Any process that activates or increases the frequency, rate or extent of cell differentiation. [GOC:go_curators]	32	0.0379	2.71e-21	9.22e-19	MMP14, RUNX1, GAS6, TIMP2, MDK, PTN, SOX4, ANXA1, ZFP36L1, TWIST1, SLIT2, SERPINF1, JUN, GJA1, IGF1, FLNA, CDH2, SOCS3, CSF1, SERPINE2, PLXNA2, MME, TNFSF11, CXCL12, KITLG, PTPRD, CTHRC1, FGFR1, ZEB2, LPL, METRNL, WIF1
GOBP_REGULATION_OF_CELL_DEATH	1659	Any process that modulates the rate or frequency of cell death. Cell death is the specific activation or halting of processes within a cell so that its vital functions markedly cease, rather than simply deteriorating gradually over time, which culminates in cell death. [GOC:dph, GOC:tb]	42	0.0253	3.09e-21	1.01e-18	LOX, CREB3L1, FAP, GAS6, MMP9, MDK, PTN, SOX4, ANXA1, ZFP36L1, TWIST1, FGFR2, SLIT2, SERPINF1, JUN, GJA1, ANGPTL4, IGF1, FLNA, CCL2, PDGFRB, APOE, HPGD, SOCS3, FHL2, CSF1, CXCL12, KITLG, PRDX2, CTSC, FGFR1, MAP4K4, GSN, LGALS1, TLE5, FSTL1, DAPK2, PLAC8, GAS1, ACAA2, HP, STK17B
GOBP_RESPONSE_TO_WOUNDING	654	Any process that results in a change in state or activity of a cell or an organism (in terms of movement, secretion, enzyme production, gene expression, etc.) as a result of a stimulus indicating damage to the organism. [GOC:go_curators]	29	0.0443	3.43e-21	1.06e-18	LOX, FAP, COL5A1, COL3A1, SPP1, GAS6, TNC, POSTN, FBLN1, MDK, PTN, ANXA1, ZFP36L1, FGFR2, GJA1, IGF1, FLNA, PDGFRB, APOE, TPM1, SERPINE2, PTPRS, PRDX2, MYL9, ZFP36L2, GSN, LGALS1, DPYSL3, PROS1
GOBP_POSITIVE_REGULATION_OF_MULTICELLULAR_ORGANISMAL_PROCESS	1397	Any process that activates or increases the frequency, rate or extent of an organismal process, any of the processes pertinent to the function of an organism above the cellular level; includes the integrated processes of tissues and organs. [GOC:ai]	39	0.0279	3.53e-21	1.06e-18	MMP14, RUNX1, ADAM12, GAS6, BMP1, POSTN, MFAP2, LUM, MDK, PTN, SOX4, ANXA1, ZFP36L1, TWIST1, FGFR2, SLIT2, SERPINF1, JUN, GJA1, SRPX2, BASP1, ANGPTL4, IGF1, APOE, LEPR, EPAS1, TPM1, CSF1, SERPINE2, PLXNA2, MME, TNFSF11, CXCL12, KITLG, PTPRD, PRDX2, B2M, LPL, PLAC8
GOBP_NEGATIVE_REGULATION_OF_RESPONSE_TO_STIMULUS	1673	Any process that stops, prevents, or reduces the frequency, rate or extent of a response to a stimulus. Response to stimulus is a change in state or activity of a cell or an organism (in terms of movement, secretion, enzyme production, gene expression, etc.) as a result of a stimulus. [GOC:jid]	42	0.0251	4.22e-21	1.22e-18	MMP14, CREB3L1, FBN1, FAP, COL3A1, SPP1, GAS6, MMP9, FBLN1, TIMP2, MDK, ANXA1, TWIST1, SLIT2, SERPINF1, GJA1, IGF1, CDH2, CCL2, APOE, SOCS3, FHL2, SLIT3, BICC1, SERPINE2, CXCL12, PTPRD, PTPRS, PRDX2, HLA-B, ASPN, CTHRC1, IGFBP5, LPL, METRNL, WIF1, TLE5, TMSB4X, PROS1, STMN1, IGFBP4, ACAA2
GOBP_RESPONSE_TO_OXYGEN_CONTAINING_COMPOUND	1654	Any process that results in a change in state or activity of a cell or an organism (in terms of movement, secretion, enzyme production, gene expression, etc.) as a result of an oxygen-containing compound stimulus. [GOC:pr, GOC:TermGenie]	41	0.0248	2.16e-20	5.98e-18	FBN1, MMP2, COL4A1, VCAM1, LOXL1, SPP1, GAS6, MMP9, TNC, POSTN, COL5A2, MMP13, PTN, SOX4, ANXA1, ZFP36L1, FGFR2, SLIT2, SERPINF1, JUN, GJA1, IGF1, FLNA, CCL2, PDGFRB, APOE, HPGD, SOCS3, TPM1, SLIT3, BGLAP, CXCL12, PRDX2, IGFBP5, PHEX, LPL, GSN, LGALS1, ALPL, HP, CA3
GOBP_NEGATIVE_REGULATION_OF_DEVELOPMENTAL_PROCESS	928	Any process that stops, prevents or reduces the rate or extent of development, the biological process whose specific outcome is the progression of an organism over time from an initial condition (e.g. a zygote, or a young adult) to a later condition (e.g. a multicellular animal or an aged adult). [GOC:ai]	32	0.0345	4.48e-20	1.2e-17	RUNX1, ADAMTS9, ADAMTS1, CREB3L1, COL4A2, FBN1, COL5A1, SPP1, GAS6, MMP9, POSTN, FBLN1, COL5A2, MDK, PTN, ANXA1, ZFP36L1, TWIST1, SERPINF1, GJA1, IGF1, PTPRS, PRDX2, TMEM176B, B2M, S1PR3, ZFP36L2, TMEM176A, ASPN, IGFBP5, NFIB, PLAC8
GOBP_RESPONSE_TO_GROWTH_FACTOR	731	Any process that results in a change in state or activity of a cell or an organism (in terms of movement, secretion, enzyme production, gene expression, etc.) as a result of a growth factor stimulus. [GOC:BHF, GOC:mah]	28	0.0383	8.17e-19	2.11e-16	LOX, CREB3L1, COL4A2, FBN1, COL3A1, VCAM1, GAS6, TNC, POSTN, IBSP, LUM, PTN, ANXA1, ZFP36L1, TWIST1, FGFR2, SLIT2, JUN, CCL2, NRP2, PDGFRB, HPGD, BGLAP, ZFP36L2, ASPN, FGFR1, FSTL1, GAS1
GOBP_HEART_DEVELOPMENT	555	The process whose specific outcome is the progression of the heart over time, from its formation to the mature structure. The heart is a hollow, muscular organ, which, by contracting rhythmically, keeps up the circulation of the blood. [GOC:jid, UBERON:0000948]	25	0.045	1.58e-18	3.94e-16	RUNX1, LOX, ADAMTS9, ADAMTS1, FBN1, COL5A1, COL3A1, VCAM1, SH3PXD2B, PTN, SOX4, ZFP36L1, TWIST1, FGFR2, SLIT2, GJA1, BASP1, IGF1, FLNA, NRP2, PDGFRB, TPM1, FHL2, SLIT3, BICC1
GOBP_LEUKOCYTE_DIFFERENTIATION	525	The process in which a relatively unspecialized hemopoietic precursor cell acquires the specialized features of a leukocyte. A leukocyte is an achromatic cell of the myeloid or lymphoid lineages capable of ameboid movement, found in blood or other tissue. [CL:0000738, GOC:add, PMID:16551264]	24	0.0457	5.77e-18	1.39e-15	MMP14, RUNX1, FBN1, VCAM1, GAS6, MMP9, MDK, SOX4, ANXA1, ZFP36L1, JUN, LEPR, CSF1, TNFSF11, BGLAP, KITLG, PRDX2, TMEM176B, B2M, ZFP36L2, HLA-B, TMEM176A, LGALS1, KLF6
GOBP_NEURON_DIFFERENTIATION	1357	The process in which a relatively unspecialized cell acquires specialized features of a neuron. [GOC:mah]	35	0.0258	6.03e-18	1.41e-15	RUNX1, VCAM1, SPP1, TNC, POSTN, TIMP2, MDK, PTN, SOX4, FGFR2, SLIT2, SERPINF1, GJA1, FLNA, CDH2, NRP2, PRRX1, APOE, SLIT3, PLXNA2, CXCL12, PTPRD, PTPRS, B2M, CTHRC1, NFIB, FGFR1, CDH11, MAP4K4, PALLD, LGALS1, SATB2, DPYSL3, SDC2, STMN1
GOBP_REGULATION_OF_HEMOPOIESIS	415	Any process that modulates the frequency, rate or extent of hemopoiesis. [GO_REF:0000058, GOC:pad, GOC:PARL, GOC:TermGenie, PMID:20080761]	22	0.053	6.82e-18	1.47e-15	MMP14, RUNX1, LOX, FBN1, GAS6, MDK, PTN, SOX4, ANXA1, ZFP36L1, JUN, CSF1, TNFSF11, BGLAP, KITLG, PRDX2, MYL9, TMEM176B, B2M, ZFP36L2, HLA-B, TMEM176A
GOBP_NEGATIVE_REGULATION_OF_MULTICELLULAR_ORGANISMAL_PROCESS	1104	Any process that stops, prevents, or reduces the frequency, rate or extent of an organismal process, the processes pertinent to the function of an organism above the cellular level; includes the integrated processes of tissues and organs. [GOC:ai]	32	0.029	6.97e-18	1.47e-15	RUNX1, ADAMTS9, ADAMTS1, CREB3L1, COL4A2, FBN1, FAP, SPP1, GAS6, ADAMTS5, MDK, PTN, ANXA1, TWIST1, SLIT2, SERPINF1, GJA1, IGF1, APOE, SERPINE2, PTPRS, PRDX2, TMEM176B, B2M, TMEM176A, ASPN, CTSC, IGFBP5, NFIB, TMSB4X, PROS1, PLAC8
GOBP_RESPONSE_TO_CYTOKINE	1188	Any process that results in a change in state or activity of a cell or an organism (in terms of movement, secretion, enzyme production, gene expression, etc.) as a result of a cytokine stimulus. [GOC:sl]	33	0.0278	6.97e-18	1.47e-15	RUNX1, LOX, MMP2, COL3A1, VCAM1, GAS6, MMP9, POSTN, TIMP2, ANXA1, ZFP36L1, TWIST1, SLIT2, JUN, CCL2, NRP2, LEPR, SOCS3, SLIT3, CSF1, MME, TNFSF11, CXCL12, B2M, ZFP36L2, HLA-B, GSN, TLE5, DPYSL3, TMSB4X, LIFR, CNN2, IFITM3
GOBP_EPITHELIUM_DEVELOPMENT	1275	The process whose specific outcome is the progression of an epithelium over time, from its formation to the mature structure. An epithelium is a tissue that covers the internal or external surfaces of an anatomical structure. [GOC:dph, GOC:mtg_lung]	34	0.0267	7.06e-18	1.47e-15	MMP14, RUNX1, COL4A1, COL22A1, COL5A1, MMP9, CTSK, CTSV, TNC, MDK, PTN, SOX4, ANXA1, ZFP36L1, TWIST1, FGFR2, SLIT2, GJA1, BASP1, FLNA, CDH2, SOCS3, CSF1, SERPINE2, PLXNA2, TNFSF11, PTPRS, S1PR3, CTHRC1, IGFBP5, NFIB, PALLD, FSTL1, TAGLN2
GOBP_APOPTOTIC_PROCESS	1931	A programmed cell death process which begins when a cell receives an internal (e.g. DNA damage) or external signal (e.g. an extracellular death ligand), and proceeds through a series of biochemical events (signaling pathway phase) which trigger an execution phase. The execution phase is the last step of an apoptotic process, and is typically characterized by rounding-up of the cell, retraction of…	40	0.0207	3.45e-17	6.98e-15	LOX, CREB3L1, FAP, GAS6, MMP9, MDK, PTN, SOX4, ANXA1, ZFP36L1, TWIST1, FGFR2, SLIT2, JUN, GJA1, ANGPTL4, IGF1, FLNA, CCL2, PDGFRB, APOE, HPGD, SOCS3, FHL2, SLIT3, CXCL12, KITLG, PRDX2, CTSC, FGFR1, MAP4K4, GSN, LGALS1, TLE5, FSTL1, DAPK2, PLAC8, GAS1, ACAA2, STK17B
GOBP_POSITIVE_REGULATION_OF_CELL_POPULATION_PROLIFERATION	941	Any process that activates or increases the rate or extent of cell proliferation. [GOC:go_curators]	29	0.0308	5.93e-17	1.17e-14	ADAMTS1, MMP2, VCAM1, GAS6, MMP9, TNC, MDK, PTN, SOX4, ANXA1, TWIST1, FGFR2, JUN, GJA1, IGF1, FLNA, NRP2, PDGFRB, PRRX1, HPGD, CSF1, CXCL12, KITLG, S1PR3, CTHRC1, IGFBP5, FGFR1, PLAC8, LIFR
GOBP_REGULATION_OF_RESPONSE_TO_EXTERNAL_STIMULUS	1036	Any process that modulates the frequency, rate or extent of a response to an external stimulus. [GOC:mah]	30	0.029	8.69e-17	1.67e-14	FAP, SPP1, GAS6, MMP9, MDK, PTN, ANXA1, SLIT2, SERPINF1, GJA1, IGF1, FLNA, CCL2, PDGFRB, APOE, SOCS3, CSF1, SERPINE2, TNFSF11, CXCL12, PTPRS, PRDX2, HLA-B, CTSC, FGFR1, LPL, METRNL, DAPK2, TMSB4X, PROS1
GOBP_REGULATION_OF_CELL_ADHESION	732	Any process that modulates the frequency, rate or extent of attachment of a cell to another cell or to the extracellular matrix. [GOC:mah]	26	0.0355	9.79e-17	1.83e-14	MMP14, RUNX1, VCAM1, DMP1, TNC, POSTN, FBLN1, IBSP, MDK, PTN, SOX4, ANXA1, IGF1, FLNA, CCL2, TPM1, CSF1, SERPINE2, PLXNA2, TNFSF11, CXCL12, PRDX2, MAP4K4, LIMCH1, GSN, LGALS1
GOBP_POST_TRANSLATIONAL_PROTEIN_MODIFICATION	361	The process of covalently altering one or more amino acids in a protein after the protein has been completely translated and released from the ribosome. [GOC:jsg]	20	0.0554	1e-16	1.83e-14	FBN1, SPP1, GAS6, DMP1, TNC, VCAN, QSOX1, CDH2, APOE, EPAS1, SOCS3, CSF1, IGFBP5, LGALS1, MXRA8, SDC2, FSTL1, IGFBP4, CP, WSB1
GOBP_REGULATION_OF_IMMUNE_SYSTEM_PROCESS	1593	Any process that modulates the frequency, rate, or extent of an immune system process. [GOC:add]	36	0.0226	1.2e-16	2.13e-14	MMP14, RUNX1, LOX, FBN1, COL3A1, VCAM1, GAS6, MDK, PTN, SOX4, ANXA1, ZFP36L1, SLIT2, JUN, IGF1, CCL2, APOE, SOCS3, CSF1, TNFSF11, BGLAP, CXCL12, KITLG, PTPRD, PRDX2, MYL9, TMEM176B, B2M, ZFP36L2, HLA-B, TMEM176A, CTSC, LGALS1, DAPK2, PROS1, CFH
GOBP_DEVELOPMENTAL_GROWTH	605	The increase in size or mass of an entire organism, a part of an organism or a cell, where the increase in size or mass has the specific outcome of the progression of the organism over time from one condition to another. [GOC:go_curators]	24	0.0397	1.41e-16	2.45e-14	RUNX1, SPP1, TNC, POSTN, MDK, PTN, ANXA1, ZFP36L1, FGFR2, SLIT2, GJA1, BASP1, IGF1, NRP2, PDGFRB, APOE, LEPR, SLIT3, CSF1, CXCL12, PTPRS, GSN, PLAC8, GAS1
GOBP_IMMUNE_SYSTEM_DEVELOPMENT	989	The process whose specific outcome is the progression of an organismal system whose objective is to provide calibrated responses by an organism to a potential internal or invasive threat, over time, from its formation to the mature structure. A system is a regularly interacting or interdependent group of organs or tissues that work together to carry out a given biological process. [GOC:add, GOC:d…	29	0.0293	2.17e-16	3.69e-14	MMP14, RUNX1, LOX, FBN1, VCAM1, GAS6, MMP9, MDK, PTN, SOX4, ANXA1, ZFP36L1, FGFR2, JUN, LEPR, EPAS1, CSF1, TNFSF11, BGLAP, KITLG, PRDX2, MYL9, TMEM176B, B2M, ZFP36L2, HLA-B, TMEM176A, LGALS1, KLF6
GOBP_REGULATION_OF_LEUKOCYTE_DIFFERENTIATION	279	Any process that modulates the frequency, rate or extent of leukocyte differentiation. [GOC:add, GOC:TermGenie]	18	0.0645	2.58e-16	4.29e-14	MMP14, RUNX1, FBN1, GAS6, MDK, SOX4, ANXA1, ZFP36L1, JUN, CSF1, TNFSF11, BGLAP, KITLG, PRDX2, TMEM176B, ZFP36L2, HLA-B, TMEM176A
GOBP_REPRODUCTION	1442	The production of new individuals that contain some portion of genetic material inherited from one or more parent organisms. [GOC:go_curators, GOC:isa_complete, GOC:jl, ISBN:0198506732]	34	0.0236	2.78e-16	4.52e-14	MMP14, ADAMTS1, MMP2, ANTXR1, SPP1, MMP9, TNC, ADAMTS2, MMP23B, MDK, PTN, ANXA1, ZFP36L1, FGFR2, SLIT2, SERPINF1, GJA1, BASP1, IGF1, FLNA, PDGFRB, LEPR, HPGD, EPAS1, SOCS3, SLIT3, CSF1, SERPINE2, MME, KITLG, IGFBP5, ALPL, CKS2, PAPPA
GOBP_REGULATION_OF_ANATOMICAL_STRUCTURE_MORPHOGENESIS	1006	Any process that modulates the frequency, rate or extent of anatomical structure morphogenesis. [GOC:mah]	29	0.0288	3.38e-16	5.38e-14	RUNX1, ADAMTS9, ADAM12, ADAMTS1, CREB3L1, COL4A2, SPP1, POSTN, FBLN1, MDK, PTN, ANXA1, TWIST1, FGFR2, SLIT2, SERPINF1, GJA1, ANGPTL4, FLNA, CDH2, CCL2, TPM1, CSF1, PLXNA2, CXCL12, PTPRD, PTPRS, CTHRC1, SDC2
GOBP_CELL_ACTIVATION	1461	A change in the morphology or behavior of a cell resulting from exposure to an activating factor such as a cellular or soluble ligand. [GOC:mgi_curators]	34	0.0233	4.08e-16	6.37e-14	MMP14, RUNX1, COL3A1, VCAM1, GAS6, MMP9, TIMP2, QSOX1, MDK, SOX4, ANXA1, ZFP36L1, IGF1, FLNA, CCL2, PDGFRB, APOE, LEPR, CSF1, SERPINE2, MME, TNFSF11, PRDX2, MYL9, B2M, ZFP36L2, HLA-B, CTSC, GSN, LGALS1, PLAC8, HP, KLF6, CNN2
GOBP_SUPRAMOLECULAR_FIBER_ORGANIZATION	711	A process that is carried out at the cellular level which results in the assembly, arrangement of constituent parts, or disassembly of a supramolecular fiber, a polymer consisting of an indefinite number of protein or protein complex subunits that have polymerised to form a fiber-shaped structure. [GOC:pr]	25	0.0352	5.06e-16	7.72e-14	LOX, COL5A1, COL3A1, LOXL1, ADAMTS2, COL5A2, COL12A1, LUM, SLIT2, FLNA, PDGFRB, APOE, CALD1, TPM1, CXCL12, B2M, LIMCH1, FAT1, GSN, DPYSL3, TMSB4X, STMN1, MARCKS, TPM2, MYO1B
GOBP_NEURON_DEVELOPMENT	1109	The process whose specific outcome is the progression of a neuron over time, from initial commitment of the cell to a specific fate, to the fully functional differentiated cell. [GOC:dph]	30	0.0271	5.36e-16	8.03e-14	RUNX1, SPP1, TNC, POSTN, MDK, PTN, FGFR2, SLIT2, SERPINF1, GJA1, FLNA, CDH2, NRP2, PRRX1, APOE, SLIT3, PLXNA2, CXCL12, PTPRD, PTPRS, B2M, CTHRC1, NFIB, CDH11, MAP4K4, PALLD, LGALS1, DPYSL3, SDC2, STMN1
GOBP_POSITIVE_REGULATION_OF_LOCOMOTION	585	Any process that activates or increases the frequency, rate or extent of locomotion of a cell or organism. [GOC:go_curators]	23	0.0393	7.65e-16	1.12e-13	MMP14, ADAMTS1, GAS6, MMP9, POSTN, MDK, PTN, ANXA1, TWIST1, SLIT2, SRPX2, IGF1, FLNA, NRP2, PDGFRB, CSF1, CXCL12, KITLG, IGFBP5, FGFR1, MAP4K4, DAPK2, TMSB4X
GOBP_RESPONSE_TO_ABIOTIC_STIMULUS	1216	Any process that results in a change in state or activity of a cell or an organism (in terms of movement, secretion, enzyme production, gene expression, etc.) as a result of an abiotic (not derived from living organisms) stimulus. [GOC:hb]	31	0.0255	8.32e-16	1.2e-13	MMP14, MMP2, COL3A1, VCAM1, MMP9, TNC, POSTN, MDK, PTN, ANXA1, ZFP36L1, TWIST1, SERPINF1, JUN, GJA1, ANGPTL4, IGF1, CDH2, PDGFRB, EPAS1, SERPINE2, MME, BGLAP, CXCL12, LPL, METRNL, GSN, PLAC8, ACAA2, CNN2, SCARA3
GOBP_REPRODUCTIVE_SYSTEM_DEVELOPMENT	408	The progression of the reproductive system over time from its formation to the mature structure. The reproductive system consists of the organs that function in reproduction. [GOC:dph]	20	0.049	1.04e-15	1.47e-13	MMP14, ADAMTS1, SPP1, TNC, PTN, ANXA1, ZFP36L1, FGFR2, SLIT2, SERPINF1, GJA1, BASP1, FLNA, PDGFRB, EPAS1, SOCS3, SLIT3, SERPINE2, MME, KITLG
GOBP_RESPONSE_TO_ORGANIC_CYCLIC_COMPOUND	907	Any process that results in a change in state or activity of a cell or an organism (in terms of movement, secretion, enzyme production, gene expression, etc.) as a result of an organic cyclic compound stimulus. [GOC:ef]	27	0.0298	1.82e-15	2.51e-13	MMP14, RUNX1, LOX, SPP1, TNC, POSTN, LUM, PTN, ANXA1, ZFP36L1, SLIT2, SERPINF1, JUN, GJA1, FLNA, CCL2, PDGFRB, HPGD, SLIT3, BGLAP, ZFP36L2, IGFBP5, PHEX, GSN, LGALS1, ALPL, PAPPA
GOBP_EPITHELIAL_CELL_PROLIFERATION	428	The multiplication or reproduction of epithelial cells, resulting in the expansion of a cell population. Epithelial cells make up the epithelium, the covering of internal and external surfaces of the body, including the lining of vessels and other small cavities. It consists of cells joined by small amounts of cementing substances. [ISBN:0721662544]	20	0.0467	2.59e-15	3.52e-13	MMP14, FAP, MDK, PTN, ZFP36L1, TWIST1, FGFR2, SERPINF1, GJA1, IGF1, CCL2, NRP2, APOE, TNFSF11, CXCL12, B2M, IGFBP5, NFIB, FGFR1, IGFBP4
GOBP_CELL_MORPHOGENESIS	1004	The developmental process in which the size or shape of a cell is generated and organized. [GOC:clt, GOC:dph, GOC:go_curators, GOC:tb]	28	0.0279	2.64e-15	3.53e-13	COL22A1, ANTXR1, SPP1, POSTN, FBLN1, MDK, PTN, ANXA1, FGFR2, SLIT2, GJA1, FLNA, CDH2, CCL2, NRP2, APOE, TPM1, SLIT3, PLXNA2, CXCL12, PTPRD, PTPRS, NFIB, CDH11, MAP4K4, PALLD, SDC2, STMN1
GOBP_RESPONSE_TO_LIPID	865	Any process that results in a change in state or activity of a cell or an organism (in terms of movement, secretion, enzyme production, gene expression, etc.) as a result of a lipid stimulus. [GOC:sl]	26	0.0301	5.06e-15	6.64e-13	RUNX1, LOX, VCAM1, LOXL1, SPP1, TNC, POSTN, PTN, ANXA1, ZFP36L1, FGFR2, SLIT2, SERPINF1, JUN, GJA1, CCL2, PDGFRB, HPGD, SLIT3, BGLAP, PRDX2, ZFP36L2, PHEX, LPL, ALPL, PAPPA
GOBP_BONE_DEVELOPMENT	192	The process whose specific outcome is the progression of bone over time, from its formation to the mature structure. Bone is the hard skeletal connective tissue consisting of both mineral and cellular components. [GOC:dph]	15	0.0781	5.15e-15	6.64e-13	MMP14, LOX, FBN1, SH3PXD2B, MMP13, TWIST1, FGFR2, GJA1, IGF1, TNFSF11, BGLAP, IFITM5, PHEX, ALPL, FOXN3
GOBP_NEGATIVE_REGULATION_OF_SIGNALING	1409	Any process that stops, prevents, or reduces the frequency, rate or extent of a signaling process. [GOC:mtg_signal]	32	0.0227	6.67e-15	8.46e-13	MMP14, CREB3L1, FBN1, GAS6, MMP9, FBLN1, TIMP2, MDK, TWIST1, SLIT2, GJA1, IGF1, CDH2, APOE, SOCS3, FHL2, SLIT3, BICC1, SERPINE2, CXCL12, PTPRD, PTPRS, PRDX2, ASPN, CTHRC1, IGFBP5, WIF1, TLE5, TMSB4X, STMN1, IGFBP4, ACAA2
GOBP_RESPONSE_TO_HORMONE	876	Any process that results in a change in state or activity of a cell or an organism (in terms of movement, secretion, enzyme production, gene expression, etc.) as a result of a hormone stimulus. [GOC:jl]	26	0.0297	6.8e-15	8.48e-13	MMP14, RUNX1, LOX, FBN1, SPP1, TNC, TIMP2, PTN, ANXA1, ZFP36L1, SLIT2, SERPINF1, GJA1, PDGFRB, LEPR, SOCS3, FHL2, SLIT3, BGLAP, CXCL12, ZFP36L2, IGFBP5, PHEX, LPL, ALPL, PAPPA
GOBP_BIOMINERALIZATION	161	The process where mineral crystals are formed and deposited in an organized fashion in a matrix (either cellular or extracellular) by living organisms. This gives rise to inorganic compound-based structures such as skeleton, teeth, ivory, shells, cuticle, and corals as well as bacterial biomineralization products. [GOC:aa, PMID:24395694, PMID:28229486]	14	0.087	9.63e-15	1.18e-12	LOX, SPP1, GAS6, DMP1, IBSP, PTN, TWIST1, FGFR2, IGF1, BGLAP, IFITM5, ASPN, PHEX, ALPL
GOBP_WOUND_HEALING	535	The series of events that restore integrity to a damaged tissue, following an injury. [GOC:bf, PMID:15269788]	21	0.0393	1.55e-14	1.87e-12	LOX, FAP, COL5A1, COL3A1, GAS6, TNC, POSTN, FBLN1, ANXA1, FGFR2, GJA1, IGF1, FLNA, PDGFRB, APOE, TPM1, SERPINE2, PRDX2, MYL9, GSN, PROS1
GOBP_MONONUCLEAR_CELL_DIFFERENTIATION	411	The process in which a relatively unspecialized cell acquires the specialized features of a mononuclear cell. [CL:0000842, GO_REF:0000086, GOC:TermGenie, PMID:24759906]	19	0.0462	1.62e-14	1.92e-12	MMP14, RUNX1, VCAM1, GAS6, MDK, SOX4, ANXA1, ZFP36L1, JUN, LEPR, CSF1, PRDX2, TMEM176B, B2M, ZFP36L2, HLA-B, TMEM176A, LGALS1, KLF6
GOBP_CELLULAR_RESPONSE_TO_OXYGEN_CONTAINING_COMPOUND	1182	Any process that results in a change in state or activity of a cell (in terms of movement, secretion, enzyme production, gene expression, etc.) as a result of an oxygen-containing compound stimulus. [GOC:pr, GOC:TermGenie]	29	0.0245	2.1e-14	2.45e-12	FBN1, MMP2, COL4A1, VCAM1, SPP1, GAS6, MMP9, TNC, COL5A2, PTN, SOX4, ANXA1, ZFP36L1, FGFR2, SLIT2, SERPINF1, JUN, GJA1, IGF1, FLNA, CCL2, SOCS3, TPM1, BGLAP, PRDX2, IGFBP5, PHEX, LPL, LGALS1
GOBP_TISSUE_REMODELING	175	The reorganization or renovation of existing tissues. This process can either change the characteristics of a tissue such as in blood vessel remodeling, or result in the dynamic equilibrium of a tissue such as in bone remodeling. [GOC:ebc]	14	0.08	3.09e-14	3.55e-12	MMP14, RUNX1, MMP2, SPP1, MDK, PTN, GJA1, FLNA, LEPR, EPAS1, TNFSF11, BGLAP, CTHRC1, IGFBP5
GOBP_OSTEOBLAST_DIFFERENTIATION	222	The process whereby a relatively unspecialized cell acquires the specialized features of an osteoblast, a mesodermal or neural crest cell that gives rise to bone. [CL:0000062, GO_REF:0000034, GOC:jid]	15	0.0676	4.4e-14	4.99e-12	LOX, CREB3L1, SPP1, TNC, VCAN, IBSP, TWIST1, FGFR2, IGF1, FHL2, BGLAP, CTHRC1, IGFBP5, SATB2, ALPL
GOBP_COLLAGEN_METABOLIC_PROCESS	109	The chemical reactions and pathways involving collagen, any of a group of fibrous proteins of very high tensile strength that form the main component of connective tissue in animals. Collagen is highly enriched in glycine (some regions are 33% glycine) and proline, occurring predominantly as 3-hydroxyproline (about 20%). [GOC:mah, ISBN:0198506732]	12	0.1101	4.7e-14	5.24e-12	MMP14, RUNX1, CREB3L1, FAP, MMP2, COL5A1, MMP9, CTSK, ADAMTS2, MMP13, MMP23B, PDGFRB
GOBP_EXTRACELLULAR_MATRIX_DISASSEMBLY	81	A process that results in the breakdown of the extracellular matrix. [GOC:jid]	11	0.1358	5.08e-14	5.59e-12	MMP14, FAP, MMP2, SH3PXD2B, MMP9, CTSK, CTSV, BMP1, TIMP2, MMP13, ADAMTS5
GOBP_REGULATION_OF_GROWTH	644	Any process that modulates the frequency, rate or extent of the growth of all or part of an organism so that it occurs at its proper speed, either globally or in a specific part of the organism's development. [GOC:ems, GOC:mah]	22	0.0342	5.85e-14	6.35e-12	MMP14, RUNX1, SPP1, GAS6, KAZALD1, FGFR2, SLIT2, GJA1, BASP1, IGF1, APOE, SOCS3, SLIT3, CSF1, SERPINE2, CXCL12, PTPRS, IGFBP5, TLE5, PLAC8, IGFBP4, RASGRP2
GOBP_CELL_MORPHOGENESIS_INVOLVED_IN_DIFFERENTIATION	723	The change in form (cell shape and size) that occurs when relatively unspecialized cells, e.g. embryonic or regenerative cells, acquire specialized structural and/or functional features that characterize the cells, tissues, or organs of the mature organism or some other relatively stable phase of the organism's life history. [GOC:go_curators]	23	0.0318	6.67e-14	7.13e-12	COL22A1, ANTXR1, SPP1, POSTN, FBLN1, MDK, PTN, FGFR2, SLIT2, FLNA, CDH2, NRP2, APOE, SLIT3, PLXNA2, CXCL12, PTPRD, PTPRS, NFIB, CDH11, PALLD, SDC2, STMN1
GOBP_CENTRAL_NERVOUS_SYSTEM_DEVELOPMENT	980	The process whose specific outcome is the progression of the central nervous system over time, from its formation to the mature structure. The central nervous system is the core nervous system that serves an integrating and coordinating function. In vertebrates it consists of the brain and spinal cord. In those invertebrates with a central nervous system it typically consists of a brain, cerebral…	26	0.0265	9.08e-14	9.57e-12	COL4A1, COL3A1, TIMP2, VCAN, MDK, PTN, SOX4, FGFR2, SLIT2, BASP1, FLNA, CDH2, NRP2, SERPINE2, PLXNA2, CXCL12, PTPRS, B2M, NFIB, CDH11, GSN, MXRA8, SATB2, STMN1, MARCKS, CKB
GOBP_ENZYME_LINKED_RECEPTOR_PROTEIN_SIGNALING_PATHWAY	1072	Any series of molecular signals initiated by the binding of an extracellular ligand to a receptor on the surface of the target cell, where the receptor possesses catalytic activity or is closely associated with an enzyme such as a protein kinase, and ending with regulation of a downstream cellular process, e.g. transcription. [GOC:mah, GOC:signaling, ISBN:0815316194]	27	0.0252	9.88e-14	1.03e-11	LOX, CREB3L1, COL4A2, FBN1, MMP2, COL4A1, COL3A1, GAS6, MMP9, PTN, FGFR2, JUN, IGF1, NRP2, PDGFRB, HPGD, SOCS3, CSF1, PTPRD, ASPN, IGFBP5, FGFR1, SDC2, FSTL1, STMN1, IGFBP4, LIFR
GOBP_NEGATIVE_REGULATION_OF_CELL_DIFFERENTIATION	663	Any process that stops, prevents, or reduces the frequency, rate or extent of cell differentiation. [GOC:go_curators]	22	0.0332	1.05e-13	1.07e-11	RUNX1, FBN1, COL5A1, SPP1, MMP9, POSTN, FBLN1, COL5A2, MDK, PTN, ANXA1, ZFP36L1, TWIST1, IGF1, PTPRS, PRDX2, TMEM176B, B2M, S1PR3, ZFP36L2, TMEM176A, IGFBP5
GOBP_REGENERATION	192	The regrowth of a lost or destroyed body part, such as an organ or tissue. This process may occur via renewal, repair, and/or growth alone (i.e. increase in size or mass). [GOC:mah, GOC:pr]	14	0.0729	1.12e-13	1.13e-11	RUNX1, SPP1, GAS6, TNC, POSTN, MDK, PTN, ANXA1, IGF1, FLNA, PRRX1, CXCL12, PTPRS, GSN
GOBP_EMBRYO_DEVELOPMENT	992	The process whose specific outcome is the progression of an embryo from its formation until the end of its embryonic life stage. The end of the embryonic stage is organism-specific. For example, for mammals, the process would begin with zygote formation and end with birth. For insects, the process would begin at zygote formation and end with larval hatching. For plant zygotic embryos, this would …	26	0.0262	1.2e-13	1.2e-11	MMP14, COL4A2, FBN1, MMP2, COL5A1, MMP9, COL5A2, COL12A1, MFAP2, SOX4, ZFP36L1, TWIST1, FGFR2, GJA1, BASP1, IGF1, NRP2, PRRX1, EPAS1, SOCS3, PLXNA2, KITLG, IFITM5, CTHRC1, FGFR1, SATB2
GOBP_AMEBOIDAL_TYPE_CELL_MIGRATION	473	Cell migration that is accomplished by extension and retraction of a pseudopodium. [GOC:dph]	19	0.0402	1.98e-13	1.95e-11	ADAMTS9, FAP, MMP9, PTN, ANXA1, TWIST1, SLIT2, SERPINF1, GJA1, SRPX2, CDH2, NRP2, APOE, KITLG, FGFR1, ZEB2, MAP4K4, FSTL1, TMSB4X
GOBP_CELLULAR_COMPONENT_MORPHOGENESIS	766	The process in which cellular structures, including whole cells or cell parts, are generated and organized. [GOC:dph, GOC:mah, GOC:tb]	23	0.03	2.21e-13	2.14e-11	SPP1, POSTN, MDK, PTN, FGFR2, SLIT2, GJA1, CDH2, NRP2, PDGFRB, APOE, TPM1, SLIT3, PLXNA2, CXCL12, PTPRD, PTPRS, NFIB, CDH11, MAP4K4, PALLD, SDC2, STMN1
GOBP_RESPONSE_TO_MECHANICAL_STIMULUS	202	Any process that results in a change in state or activity of a cell or an organism (in terms of movement, secretion, enzyme production, gene expression, etc.) as a result of a mechanical stimulus. [GOC:hb]	14	0.0693	2.24e-13	2.15e-11	MMP14, COL3A1, TNC, POSTN, MDK, PTN, JUN, GJA1, CDH2, SERPINE2, BGLAP, CXCL12, GSN, CNN2
GOBP_REGULATION_OF_CELL_DEVELOPMENT	484	Any process that modulates the rate, frequency or extent of the progression of the cell over time, from its formation to the mature structure. Cell development does not include the steps involved in committing a cell to a specific fate. [GOC:dph, GOC:tb]	19	0.0393	2.97e-13	2.81e-11	FBN1, SPP1, POSTN, FBLN1, MDK, PTN, SLIT2, SERPINF1, IGF1, FLNA, SERPINE2, PLXNA2, MME, TNFSF11, CXCL12, PTPRD, PTPRS, B2M, S1PR3
GOBP_DEVELOPMENTAL_PROCESS_INVOLVED_IN_REPRODUCTION	957	A developmental process in which a progressive change in the state of some part of an organism specifically contributes to its ability to form offspring. [GOC:dph, GOC:isa_complete]	25	0.0261	4e-13	3.74e-11	MMP14, ADAMTS1, SPP1, TNC, ADAMTS2, MDK, PTN, ANXA1, ZFP36L1, FGFR2, SLIT2, SERPINF1, GJA1, BASP1, IGF1, FLNA, PDGFRB, EPAS1, SOCS3, SLIT3, CSF1, SERPINE2, MME, KITLG, ALPL
GOBP_CELL_PROJECTION_ORGANIZATION	1567	A process that is carried out at the cellular level which results in the assembly, arrangement of constituent parts, or disassembly of a prolongation or process extending from a cell, e.g. a flagellum or axon. [GOC:jl, GOC:mah, http://www.cogsci.princeton.edu/~wn/]	31	0.0198	7.04e-13	6.5e-11	SPP1, TNC, POSTN, MDK, PTN, FGFR2, SLIT2, SERPINF1, GJA1, FLNA, CDH2, NRP2, PRRX1, APOE, TPM1, SLIT3, PLXNA2, CXCL12, PTPRD, PTPRS, B2M, CTHRC1, NFIB, CDH11, MAP4K4, PALLD, GSN, LGALS1, DPYSL3, SDC2, STMN1
GOBP_NEGATIVE_REGULATION_OF_CELL_DEATH	991	Any process that decreases the rate or frequency of cell death. Cell death is the specific activation or halting of processes within a cell so that its vital functions markedly cease, rather than simply deteriorating gradually over time, which culminates in cell death. [GOC:BHF, GOC:dph, GOC:tb]	25	0.0252	8.58e-13	7.83e-11	CREB3L1, GAS6, MMP9, MDK, SOX4, ANXA1, TWIST1, FGFR2, SERPINF1, ANGPTL4, IGF1, FLNA, CCL2, PDGFRB, APOE, SOCS3, FHL2, CSF1, CXCL12, KITLG, PRDX2, MAP4K4, FSTL1, PLAC8, ACAA2
GOBP_CELL_PART_MORPHOGENESIS	679	The process in which the anatomical structures of a cell part are generated and organized. [GOC:mah]	21	0.0309	1.5e-12	1.36e-10	SPP1, POSTN, MDK, PTN, FGFR2, SLIT2, GJA1, CDH2, NRP2, APOE, SLIT3, PLXNA2, CXCL12, PTPRD, PTPRS, NFIB, CDH11, MAP4K4, PALLD, SDC2, STMN1
GOBP_RESPIRATORY_SYSTEM_DEVELOPMENT	188	The progression of the respiratory system over time from its formation to its mature structure. The respiratory system carries out respiratory gaseous exchange. [GOC:dph]	13	0.0691	1.7e-12	1.52e-10	MMP14, LOX, TNC, ADAMTS2, PTN, FGFR2, BASP1, PDGFRB, EPAS1, MME, IGFBP5, PHEX, NFIB
GOBP_INFLAMMATORY_RESPONSE	773	The immediate defensive reaction (by vertebrate tissue) to infection or injury caused by chemical or physical agents. The process is characterized by local vasodilation, extravasation of plasma into intercellular spaces and accumulation of white blood cells and macrophages. [GO_REF:0000022, ISBN:0198506732]	22	0.0285	2.18e-12	1.92e-10	VCAM1, SPP1, MMP9, MDK, PTN, ANXA1, SERPINF1, GJA1, IGF1, CCL2, APOE, SOCS3, CSF1, TNFSF11, PRDX2, S1PR3, CTSC, LPL, METRNL, TMSB4X, IGFBP4, HP
GOBP_ACTIN_FILAMENT_BASED_PROCESS	790	Any cellular process that depends upon or alters the actin cytoskeleton, that part of the cytoskeleton comprising actin filaments and their associated proteins. [GOC:mah]	22	0.0278	3.34e-12	2.9e-10	ANTXR1, MDK, ANXA1, SLIT2, GJA1, FLNA, PDGFRB, CALD1, TPM1, CXCL12, PALLD, LIMCH1, FAT1, GSN, DPYSL3, TMSB4X, STMN1, CNN2, MARCKS, TPM2, MYO1B, FRMD6
GOBP_CELL_SUBSTRATE_ADHESION	359	The attachment of a cell to the underlying substrate via adhesion molecules. [GOC:mah, GOC:pf]	16	0.0446	3.64e-12	3.13e-10	MMP14, ADAMTS9, ANTXR1, COL3A1, VCAM1, GAS6, DMP1, POSTN, FBLN1, MDK, PTN, FLNA, CSF1, MAP4K4, LIMCH1, LGALS1
GOBP_REGULATION_OF_INTRACELLULAR_SIGNAL_TRANSDUCTION	1783	Any process that modulates the frequency, rate or extent of intracellular signal transduction. [GOC:dph, GOC:signaling, GOC:tb, GOC:TermGenie]	32	0.0179	3.72e-12	3.16e-10	CREB3L1, COL3A1, GAS6, MMP9, FBLN1, TIMP2, TWIST1, FGFR2, SLIT2, GJA1, IGF1, FLNA, CDH2, CCL2, PDGFRB, APOE, FHL2, CSF1, SERPINE2, TNFSF11, CXCL12, KITLG, PRDX2, IGFBP5, FGFR1, MAP4K4, LGALS1, DAPK2, TMSB4X, STMN1, IGFBP4, WLS
GOBP_POSITIVE_REGULATION_OF_CELL_ADHESION	425	Any process that activates or increases the frequency, rate or extent of cell adhesion. [GOC:go_curators]	17	0.04	4.17e-12	3.5e-10	RUNX1, VCAM1, DMP1, IBSP, MDK, PTN, SOX4, ANXA1, IGF1, FLNA, CCL2, TPM1, CSF1, TNFSF11, CXCL12, MAP4K4, LGALS1
GOBP_CELL_CHEMOTAXIS	305	The directed movement of a motile cell guided by a specific chemical concentration gradient. Movement may be towards a higher concentration (positive chemotaxis) or towards a lower concentration (negative chemotaxis). [GOC:dph]	15	0.0492	4.37e-12	3.63e-10	LOX, VCAM1, GAS6, MDK, PTN, ANXA1, SLIT2, CCL2, PDGFRB, CSF1, TNFSF11, CXCL12, FGFR1, DAPK2, TMSB4X
GOBP_PROTEOLYSIS	1797	The hydrolysis of proteins into smaller polypeptides and/or amino acids by cleavage of their peptide bonds. [GOC:bf, GOC:mah]	32	0.0178	4.56e-12	3.75e-10	MMP14, RUNX1, ADAMTS9, ADAM12, ADAMTS1, FAP, MMP2, ANTXR1, GAS6, MMP9, CTSK, CTSV, BMP1, ADAMTS2, FBLN1, TIMP2, MMP13, ADAMTS5, MMP23B, SERPINF1, APOE, SERPINE2, MME, CTSC, PHEX, GSN, PROS1, PAPPA, GAS1, HP, PCOLCE, CPZ
GOBP_HOMEOSTATIC_PROCESS	1912	Any biological process involved in the maintenance of an internal steady state. [GOC:jl, ISBN:0395825172]	33	0.0173	4.62e-12	3.75e-10	LOX, SPP1, GAS6, MFAP2, ADAMTS5, SOX4, ANXA1, ZFP36L1, SERPINF1, GJA1, ANGPTL4, CDH2, CCL2, APOE, LEPR, EPAS1, CSF1, TNFSF11, BGLAP, CXCL12, KITLG, PRDX2, B2M, S1PR3, IGFBP5, LPL, METRNL, LGALS1, FSTL1, STMN1, PLAC8, CP, CKB
GOBP_REGULATION_OF_NEURON_PROJECTION_DEVELOPMENT	428	Any process that modulates the rate, frequency or extent of neuron projection development. Neuron projection development is the process whose specific outcome is the progression of a neuron projection over time, from its formation to the mature structure. A neuron projection is any process extending from a neural cell, such as axons or dendrites (collectively called neurites). [GOC:dph, GOC:tb]	17	0.0397	4.66e-12	3.75e-10	SPP1, MDK, PTN, SLIT2, SERPINF1, FLNA, CDH2, PRRX1, APOE, PLXNA2, CXCL12, PTPRD, PTPRS, B2M, LGALS1, DPYSL3, SDC2
GOBP_TAXIS	644	The directed movement of a motile cell or organism in response to an external stimulus. [GOC:jl, ISBN:0192801023]	20	0.0311	4.92e-12	3.92e-10	LOX, VCAM1, GAS6, MDK, PTN, ANXA1, SLIT2, CCL2, NRP2, PDGFRB, SLIT3, CSF1, PLXNA2, TNFSF11, CXCL12, NFIB, FGFR1, PALLD, DAPK2, TMSB4X
GOBP_ODONTOGENESIS	123	The process whose specific outcome is the progression of a tooth or teeth over time, from formation to the mature structure(s). A tooth is any hard bony, calcareous, or chitinous organ found in the mouth or pharynx of an animal and used in procuring or masticating food. [GOC:jl, GOC:mah]	11	0.0894	5.54e-12	4.33e-10	DMP1, TNC, ADAMTS5, TWIST1, FGFR2, CSF1, TNFSF11, BGLAP, ASPN, PHEX, ALPL
GOBP_SMOOTH_MUSCLE_CELL_PROLIFERATION	162	The multiplication or reproduction of smooth muscle cells, resulting in the expansion of a cell population. [CL:0000192, GOC:ebc, PMID:1840698]	12	0.0741	5.56e-12	4.33e-10	ADAMTS1, MMP2, MMP9, FGFR2, JUN, GJA1, IGF1, PDGFRB, HPGD, TPM1, IGFBP5, OGN
GOBP_REGULATION_OF_RESPONSE_TO_WOUNDING	164	Any process that modulates the frequency, rate or extent of response to wounding. [GO_REF:0000058, GOC:kmv, GOC:TermGenie, pmid:19164535]	12	0.0732	6.42e-12	4.95e-10	FAP, SPP1, MDK, PTN, ANXA1, GJA1, FLNA, APOE, SERPINE2, PTPRS, PRDX2, PROS1
GOBP_REGULATION_OF_HYDROLASE_ACTIVITY	1297	Any process that modulates the frequency, rate or extent of hydrolase activity, the catalysis of the hydrolysis of various bonds, e.g. C-O, C-N, C-C, phosphoric anhydride bonds, etc. Hydrolase is the systematic name for any enzyme of EC class 3. [EC:3.-.-.-, GOC:ai]	27	0.0208	8.16e-12	6.23e-10	ANTXR1, GAS6, MMP9, FBLN1, TIMP2, PTN, ANXA1, FGFR2, SLIT2, SERPINF1, JUN, ANGPTL4, CCL2, PDGFRB, LEPR, TPM1, SERPINE2, PLXNA2, FGFR1, LPL, MAP4K4, GSN, PROS1, STMN1, RASGRP2, TPM2, PCOLCE
GOBP_UROGENITAL_SYSTEM_DEVELOPMENT	320	The process whose specific outcome is the progression of the urogenital system over time, from its formation to the mature structure. [GOC:go_curators]	15	0.0469	8.65e-12	6.54e-10	ADAMTS1, FBN1, COL4A1, MMP9, TNC, SOX4, ANXA1, FGFR2, SLIT2, SERPINF1, BASP1, PDGFRB, HPGD, BICC1, MME
GOBP_REGULATION_OF_RESPONSE_TO_STRESS	1414	Any process that modulates the frequency, rate or extent of a response to stress. Response to stress is a change in state or activity of a cell or an organism (in terms of movement, secretion, enzyme production, gene expression, etc.) as a result of a disturbance in organismal or cellular homeostasis, usually, but not necessarily, exogenous (e.g. temperature, humidity, ionizing radiation). [GOC:d…	28	0.0198	1.03e-11	7.72e-10	CREB3L1, FAP, SPP1, MMP9, MDK, PTN, ANXA1, TWIST1, SERPINF1, GJA1, IGF1, FLNA, PRRX1, APOE, SOCS3, SERPINE2, TNFSF11, CXCL12, PTPRS, PRDX2, B2M, HLA-B, CTSC, LPL, METRNL, MAP4K4, TMSB4X, PROS1
