# Supplementary material for: MMP14 cleaves PTH1R in the chondrocyte-derived osteoblast lineage, curbing signaling intensity for proper bone anabolism
Source: eLife. 2023 Mar 9;12:e82142. doi: 10.7554/eLife.82142 (PMC10036123; doi:10.7554/eLife.82142)
Supplement: Figure 1—source data 3. [file elife-82142-fig1-data3.xlsx]

## Sheet: Summary
Figure 1—source data 3. Signature genes for the sub-populations at P56 (Figure 1F), and for the sub-populations of P6 and P56 combined (Figure 1J).
Column Name	Explanation
gene	the mouse gene
p_val	p value
avg_log2FC	average log2(fold change)
% in this cluster	percentage of cells expressing the gene in the cluster
% in all other cells	percentage of cells expressing the gene in all other clusters
% difference	the difference between (% in this cluster) and (% in all other cells)
p_val_adj	adjusted p-values
this cluster	the name of the cluster

## Sheet: Figure 1F (P56)
gene	p_val	avg_log2FC	% in this cluster	% in all other cells	% difference	p_val_adj	this cluster
Chst11	9.02799e-45	2.04763	0.934	0.521	0.413	1.86762e-40	Chondrocytes
Fmod	3.30313e-40	1.74769	0.958	0.456	0.502	6.83318e-36	Chondrocytes
Cnmd	4.61554e-40	1.91027	0.946	0.335	0.611	9.54816e-36	Chondrocytes
Xylt1	1.01212e-39	1.37508	0.922	0.471	0.451	2.09377e-35	Chondrocytes
Sox9	4.58872e-39	1.7867	0.976	0.494	0.482	9.49268e-35	Chondrocytes
Calml3	6.76039e-37	1.13941	0.689	0.122	0.567	1.39852e-32	Chondrocytes
Col27a1	6.92028e-37	1.66884	0.988	0.502	0.486	1.4316e-32	Chondrocytes
Chadl	7.51322e-37	1.32557	0.922	0.361	0.561	1.55426e-32	Chondrocytes
Ucma	9.6472e-37	2.0976	0.892	0.342	0.55	1.99572e-32	Chondrocytes
Papss2	2.95994e-35	1.57827	0.892	0.433	0.459	6.12323e-31	Chondrocytes
Scrg1	5.89816e-35	1.60491	0.91	0.388	0.522	1.22015e-30	Chondrocytes
Sox5	8.9028e-35	1.11709	0.91	0.422	0.488	1.84172e-30	Chondrocytes
Edil3	2.29146e-34	1.29166	0.826	0.327	0.499	4.74035e-30	Chondrocytes
Acan	3.47408e-34	1.58314	0.994	0.483	0.511	7.18683e-30	Chondrocytes
Meltf	4.23771e-34	1.38786	0.91	0.399	0.511	8.76656e-30	Chondrocytes
Col9a2	1.78721e-32	1.55766	0.988	0.399	0.589	3.69719e-28	Chondrocytes
Matn3	1.61157e-31	1.67245	0.88	0.319	0.561	3.33386e-27	Chondrocytes
Pde3a	1.7933e-31	1.03395	0.743	0.213	0.53	3.70981e-27	Chondrocytes
Sdc4	3.23693e-31	1.15977	0.982	0.722	0.26	6.69623e-27	Chondrocytes
Pkdcc	4.34807e-30	1.19805	0.82	0.342	0.478	8.99486e-26	Chondrocytes
Col9a1	5.61741e-30	1.53971	0.958	0.346	0.612	1.16207e-25	Chondrocytes
Colgalt2	9.32684e-30	1.11434	0.766	0.316	0.45	1.92944e-25	Chondrocytes
Creb3l2	1.68809e-28	0.987703	0.904	0.551	0.353	3.49214e-24	Chondrocytes
Col9a3	1.84951e-28	1.43309	0.964	0.384	0.58	3.82609e-24	Chondrocytes
Prelp	3.31505e-28	1.46478	0.928	0.483	0.445	6.85785e-24	Chondrocytes
Prnp	5.06748e-28	1.20003	0.904	0.559	0.345	1.04831e-23	Chondrocytes
Pdrg1	2.76555e-27	0.903947	0.862	0.464	0.398	5.7211e-23	Chondrocytes
Hhip	3.05573e-27	1.24426	0.683	0.186	0.497	6.32139e-23	Chondrocytes
Gfpt2	3.86269e-27	1.09986	0.802	0.365	0.437	7.99074e-23	Chondrocytes
Hapln1	5.63763e-27	1.19089	0.982	0.487	0.495	1.16626e-22	Chondrocytes
Fgfrl1	1.47953e-26	0.912154	0.832	0.38	0.452	3.06071e-22	Chondrocytes
C1qtnf3	1.78667e-26	1.83218	0.659	0.171	0.488	3.69608e-22	Chondrocytes
Mgp	7.01825e-26	1.23746	0.964	0.593	0.371	1.45187e-21	Chondrocytes
Cspg4	7.33253e-26	1.09117	0.934	0.548	0.386	1.51688e-21	Chondrocytes
Mia	1.69793e-25	1.20721	0.934	0.376	0.558	3.51251e-21	Chondrocytes
Col2a1	6.58165e-25	1.32555	0.988	0.582	0.406	1.36155e-20	Chondrocytes
Slc35e3	7.63411e-25	0.857226	0.707	0.259	0.448	1.57927e-20	Chondrocytes
3110079O15Rik	8.77311e-25	1.02219	0.994	0.422	0.572	1.81489e-20	Chondrocytes
Kcnma1	8.88067e-25	0.959996	0.826	0.445	0.381	1.83714e-20	Chondrocytes
Trpv4	2.88355e-24	0.963878	0.766	0.38	0.386	5.9652e-20	Chondrocytes
Gpc6	3.2846e-24	0.735024	0.802	0.369	0.433	6.79486e-20	Chondrocytes
Cmtm5	3.94314e-24	0.570078	0.545	0.114	0.431	8.15717e-20	Chondrocytes
Hbegf	8.86942e-24	1.29199	0.874	0.414	0.46	1.83482e-19	Chondrocytes
Pcp4	9.3379e-24	1.35455	0.515	0.099	0.416	1.93173e-19	Chondrocytes
Csgalnact1	1.40367e-23	0.809999	0.719	0.285	0.434	2.90378e-19	Chondrocytes
Crispld2	1.55447e-23	1.27265	0.719	0.3	0.419	3.21574e-19	Chondrocytes
Thbs3	1.90285e-23	0.98704	0.796	0.369	0.427	3.93643e-19	Chondrocytes
Trps1	3.48107e-23	0.9823	0.952	0.7	0.252	7.20129e-19	Chondrocytes
Rcn2	8.17544e-23	0.749421	0.91	0.62	0.29	1.69125e-18	Chondrocytes
Angptl2	1.01977e-22	0.935517	0.802	0.354	0.448	2.1096e-18	Chondrocytes
Nckap5	1.99874e-22	0.769941	0.575	0.16	0.415	4.13479e-18	Chondrocytes
Osmr	2.0132e-22	0.940317	0.749	0.308	0.441	4.1647e-18	Chondrocytes
Rcan1	3.28328e-22	1.64102	0.749	0.365	0.384	6.79212e-18	Chondrocytes
Cpne8	3.49683e-22	0.715103	0.82	0.361	0.459	7.23389e-18	Chondrocytes
Fn1	4.13958e-22	1.2626	0.994	0.734	0.26	8.56355e-18	Chondrocytes
Nfatc2	5.06752e-22	1.34522	0.653	0.236	0.417	1.04832e-17	Chondrocytes
Ncmap	5.59504e-22	0.751844	0.826	0.35	0.476	1.15745e-17	Chondrocytes
Srxn1	5.70966e-22	1.93293	0.665	0.274	0.391	1.18116e-17	Chondrocytes
Wwp2	6.93006e-22	0.98617	0.886	0.532	0.354	1.43362e-17	Chondrocytes
Notum	6.95313e-22	0.941903	0.449	0.072	0.377	1.43839e-17	Chondrocytes
Fgfr3	8.37644e-22	0.973736	0.856	0.407	0.449	1.73283e-17	Chondrocytes
Nid2	8.87933e-22	0.820088	0.808	0.319	0.489	1.83687e-17	Chondrocytes
Ccnd1	9.38994e-22	0.969591	0.671	0.236	0.435	1.9425e-17	Chondrocytes
Meg3	1.0787e-21	1.65676	0.677	0.243	0.434	2.23151e-17	Chondrocytes
Bmp7	3.41074e-21	0.568984	0.599	0.186	0.413	7.0558e-17	Chondrocytes
Msi2	5.56729e-21	0.898182	0.91	0.627	0.283	1.15171e-16	Chondrocytes
Lsp1	8.06677e-21	1.10847	0.856	0.456	0.4	1.66877e-16	Chondrocytes
Casc4	1.02051e-20	0.561617	0.832	0.475	0.357	2.11113e-16	Chondrocytes
Slc39a14	1.11317e-20	1.02299	0.82	0.445	0.375	2.30282e-16	Chondrocytes
Emilin1	1.37508e-20	0.793206	0.886	0.551	0.335	2.84464e-16	Chondrocytes
S100b	1.5106e-20	0.827008	0.862	0.475	0.387	3.12497e-16	Chondrocytes
Susd5	3.10786e-20	0.741479	0.904	0.426	0.478	6.42922e-16	Chondrocytes
Spats2l	3.15178e-20	0.569591	0.659	0.232	0.427	6.52008e-16	Chondrocytes
Peg3	3.34212e-20	0.823458	0.886	0.464	0.422	6.91383e-16	Chondrocytes
Ephb2	5.92328e-20	0.634283	0.581	0.194	0.387	1.22535e-15	Chondrocytes
P3h4	6.91523e-20	0.801626	0.856	0.551	0.305	1.43055e-15	Chondrocytes
Unc5c	6.92305e-20	0.766232	0.689	0.319	0.37	1.43217e-15	Chondrocytes
Bhlhe41	9.27874e-20	0.779084	0.659	0.255	0.404	1.91949e-15	Chondrocytes
Col11a2	1.01219e-19	1.08366	0.994	0.616	0.378	2.09391e-15	Chondrocytes
Synpo	1.05477e-19	0.678518	0.754	0.331	0.423	2.18199e-15	Chondrocytes
Fkbp9	1.68205e-19	0.863535	0.94	0.665	0.275	3.47966e-15	Chondrocytes
Micall1	2.85948e-19	0.86227	0.605	0.224	0.381	5.91541e-15	Chondrocytes
Eif4e	3.10782e-19	1.23993	0.802	0.51	0.292	6.42915e-15	Chondrocytes
Itpr2	3.41996e-19	0.80717	0.796	0.46	0.336	7.07488e-15	Chondrocytes
Kif21a	4.35427e-19	0.6857	0.743	0.384	0.359	9.00768e-15	Chondrocytes
Nop58	4.94851e-19	1.02657	0.868	0.582	0.286	1.0237e-14	Chondrocytes
Ptch1	7.02249e-19	0.914086	0.707	0.331	0.376	1.45274e-14	Chondrocytes
Runx3	1.04699e-18	0.876683	0.725	0.338	0.387	2.16591e-14	Chondrocytes
Lef1	1.46258e-18	0.964654	0.509	0.148	0.361	3.02563e-14	Chondrocytes
Eif1a	1.60791e-18	0.756582	0.844	0.57	0.274	3.32629e-14	Chondrocytes
Nfatc1	1.70969e-18	1.03162	0.826	0.506	0.32	3.53684e-14	Chondrocytes
F3	2.15036e-18	1.64328	0.593	0.217	0.376	4.44845e-14	Chondrocytes
M1ap	2.17356e-18	1.72617	0.569	0.205	0.364	4.49645e-14	Chondrocytes
Slc26a2	2.25709e-18	0.915822	0.796	0.456	0.34	4.66923e-14	Chondrocytes
Pde4b	3.65416e-18	1.12236	0.778	0.399	0.379	7.55936e-14	Chondrocytes
Hivep3	5.87719e-18	1.33685	0.695	0.35	0.345	1.21582e-13	Chondrocytes
Epyc	6.7128e-18	1.0397	0.683	0.259	0.424	1.38868e-13	Chondrocytes
Car12	1.64675e-17	0.811699	0.629	0.217	0.412	3.40664e-13	Chondrocytes
Nrk	1.86455e-17	0.565409	0.725	0.281	0.444	3.8572e-13	Chondrocytes
Srebf1	2.06544e-17	0.745206	0.617	0.285	0.332	4.27277e-13	Chondrocytes
Sobp	2.14711e-17	0.740647	0.766	0.422	0.344	4.44173e-13	Chondrocytes
Col11a1	2.83889e-17	0.983794	0.994	0.715	0.279	5.87282e-13	Chondrocytes
Sfrp5	3.01914e-17	1.23427	0.389	0.068	0.321	6.2457e-13	Chondrocytes
Serpina1d	3.51067e-17	1.38119	0.455	0.114	0.341	7.26252e-13	Chondrocytes
Oaf	3.96806e-17	0.70101	0.683	0.323	0.36	8.20873e-13	Chondrocytes
Slc41a1	4.89787e-17	0.797288	0.719	0.395	0.324	1.01322e-12	Chondrocytes
S100a1	1.84714e-16	0.727759	0.886	0.597	0.289	3.82119e-12	Chondrocytes
Galnt18	2.86042e-16	0.516532	0.485	0.156	0.329	5.91734e-12	Chondrocytes
Aebp1	3.36707e-16	0.841172	0.731	0.395	0.336	6.96546e-12	Chondrocytes
Aff3	4.0522e-16	0.598394	0.713	0.346	0.367	8.38279e-12	Chondrocytes
Wwtr1	4.71111e-16	0.623252	0.898	0.639	0.259	9.74587e-12	Chondrocytes
Itm2a	6.80094e-16	0.735372	0.832	0.51	0.322	1.40691e-11	Chondrocytes
Vit	7.05312e-16	0.626719	0.731	0.38	0.351	1.45908e-11	Chondrocytes
Samd4b	9.49284e-16	0.568586	0.677	0.346	0.331	1.96378e-11	Chondrocytes
Hspg2	1.33734e-15	0.837052	0.922	0.662	0.26	2.76655e-11	Chondrocytes
Enpp1	1.5479e-15	0.512618	0.766	0.365	0.401	3.20214e-11	Chondrocytes
Col16a1	1.59288e-15	0.579132	0.79	0.449	0.341	3.2952e-11	Chondrocytes
Kdm6b	2.18777e-15	0.924983	0.898	0.646	0.252	4.52584e-11	Chondrocytes
Hk2	2.6206e-15	0.830863	0.766	0.449	0.317	5.42123e-11	Chondrocytes
Uck2	3.23036e-15	0.688087	0.623	0.304	0.319	6.68265e-11	Chondrocytes
Trabd2b	3.37649e-15	0.536702	0.599	0.243	0.356	6.98494e-11	Chondrocytes
1700025G04Rik	3.41645e-15	0.51345	0.79	0.475	0.315	7.06762e-11	Chondrocytes
Pacsin2	3.51068e-15	0.616924	0.778	0.449	0.329	7.26255e-11	Chondrocytes
Tgfb2	3.56282e-15	1.03635	0.647	0.335	0.312	7.37041e-11	Chondrocytes
Scd2	4.19312e-15	0.610946	0.85	0.475	0.375	8.67431e-11	Chondrocytes
Loxl2	7.13265e-15	0.697298	0.832	0.513	0.319	1.47553e-10	Chondrocytes
H19	7.49056e-15	1.35887	0.431	0.114	0.317	1.54957e-10	Chondrocytes
Camk4	9.1894e-15	0.524695	0.521	0.186	0.335	1.90101e-10	Chondrocytes
Tns1	9.31309e-15	0.775438	0.701	0.395	0.306	1.9266e-10	Chondrocytes
Tnfrsf12a	1.2584e-14	0.877264	0.743	0.441	0.302	2.60326e-10	Chondrocytes
Mdfi	1.33772e-14	0.550132	0.713	0.369	0.344	2.76733e-10	Chondrocytes
Smim3	1.40617e-14	0.700412	0.665	0.335	0.33	2.90894e-10	Chondrocytes
Pqlc1	3.41115e-14	0.702646	0.659	0.361	0.298	7.05664e-10	Chondrocytes
Trib1	4.15653e-14	1.00833	0.802	0.51	0.292	8.59861e-10	Chondrocytes
Sdc3	5.08908e-14	0.660363	0.88	0.605	0.275	1.05278e-09	Chondrocytes
Tmbim1	5.39099e-14	0.65431	0.826	0.544	0.282	1.11523e-09	Chondrocytes
Plec	6.43998e-14	0.894872	0.856	0.586	0.27	1.33224e-09	Chondrocytes
Fam89a	6.59537e-14	0.589267	0.575	0.232	0.343	1.36438e-09	Chondrocytes
Fxyd2	6.69002e-14	0.865803	0.754	0.327	0.427	1.38396e-09	Chondrocytes
Sspn	7.00211e-14	0.614465	0.629	0.323	0.306	1.44853e-09	Chondrocytes
2810001G20Rik	7.03859e-14	0.572858	0.635	0.308	0.327	1.45607e-09	Chondrocytes
Tubb2a	7.53062e-14	0.869801	0.814	0.529	0.285	1.55786e-09	Chondrocytes
Prkg2	7.68937e-14	0.654738	0.623	0.247	0.376	1.5907e-09	Chondrocytes
Rflna	8.31693e-14	0.650745	0.575	0.247	0.328	1.72052e-09	Chondrocytes
Tm4sf1	9.37646e-14	1.45471	0.689	0.414	0.275	1.93971e-09	Chondrocytes
Htra1	1.13951e-13	0.549192	0.826	0.521	0.305	2.35731e-09	Chondrocytes
Ppp1r1b	1.63251e-13	0.630467	0.569	0.255	0.314	3.37718e-09	Chondrocytes
P4ha1	1.85606e-13	0.631528	0.874	0.601	0.273	3.83964e-09	Chondrocytes
Comp	2.20809e-13	0.513367	0.976	0.601	0.375	4.56788e-09	Chondrocytes
Apoe	2.21326e-13	1.43968	0.802	0.517	0.285	4.57857e-09	Chondrocytes
Mpzl2	2.58727e-13	0.636455	0.401	0.122	0.279	5.35229e-09	Chondrocytes
Elovl6	2.91818e-13	0.546069	0.563	0.221	0.342	6.03683e-09	Chondrocytes
Mlf1	4.04581e-13	0.691073	0.485	0.19	0.295	8.36957e-09	Chondrocytes
Smtn	5.98788e-13	0.519359	0.737	0.426	0.311	1.23871e-08	Chondrocytes
Zmiz1	6.83034e-13	0.668316	0.754	0.475	0.279	1.41299e-08	Chondrocytes
Col6a3	1.01511e-12	0.664534	0.952	0.616	0.336	2.09996e-08	Chondrocytes
Kcnq1ot1	1.30619e-12	1.16942	0.874	0.597	0.277	2.70211e-08	Chondrocytes
Abhd2	2.64448e-12	0.537283	0.575	0.293	0.282	5.47064e-08	Chondrocytes
Serpine1	2.72355e-12	1.27938	0.731	0.479	0.252	5.6342e-08	Chondrocytes
Ppa1	3.06968e-12	1.21699	0.772	0.464	0.308	6.35025e-08	Chondrocytes
Fam180a	3.44345e-12	0.732413	0.593	0.289	0.304	7.12346e-08	Chondrocytes
Sdk2	6.71761e-12	0.519071	0.844	0.593	0.251	1.38967e-07	Chondrocytes
Eno1	1.53668e-11	0.591697	0.856	0.597	0.259	3.17892e-07	Chondrocytes
Socs2	1.65811e-11	0.659291	0.754	0.468	0.286	3.43013e-07	Chondrocytes
Pde4dip	1.95126e-11	0.513647	0.754	0.483	0.271	4.03657e-07	Chondrocytes
Camk2d	1.95648e-11	0.871373	0.731	0.464	0.267	4.04738e-07	Chondrocytes
Klhl21	3.22884e-11	0.580385	0.617	0.338	0.279	6.6795e-07	Chondrocytes
Ldlr	3.82952e-11	0.664692	0.635	0.376	0.259	7.92212e-07	Chondrocytes
Spsb1	5.50899e-11	0.531625	0.683	0.384	0.299	1.13964e-06	Chondrocytes
Smoc2	6.06137e-11	1.2304	0.599	0.342	0.257	1.25392e-06	Chondrocytes
Pla2g5	7.19212e-11	0.623844	0.497	0.232	0.265	1.48783e-06	Chondrocytes
Cpm	8.66163e-11	0.83693	0.503	0.228	0.275	1.79183e-06	Chondrocytes
Fscn1	9.22412e-11	0.627659	0.623	0.369	0.254	1.90819e-06	Chondrocytes
Fem1b	1.12065e-10	0.584816	0.527	0.259	0.268	2.31828e-06	Chondrocytes
Cyp51	1.60843e-10	0.549059	0.689	0.407	0.282	3.32737e-06	Chondrocytes
Lmcd1	1.84686e-10	0.633259	0.527	0.243	0.284	3.82061e-06	Chondrocytes
Ell2	2.00709e-10	0.585698	0.814	0.555	0.259	4.15206e-06	Chondrocytes
Hmgcr	2.33567e-10	0.609984	0.695	0.437	0.258	4.8318e-06	Chondrocytes
Il17b	3.95662e-10	0.605819	0.563	0.251	0.312	8.18506e-06	Chondrocytes
Ctgf	4.19436e-10	1.1612	0.856	0.597	0.259	8.67686e-06	Chondrocytes
Nt5e	4.944e-10	0.649283	0.725	0.418	0.307	1.02277e-05	Chondrocytes
Tubb6	1.80434e-09	0.505918	0.605	0.335	0.27	3.73263e-05	Chondrocytes
Col12a1	1.88129e-09	0.639797	0.766	0.506	0.26	3.89183e-05	Chondrocytes
4930523C07Rik	1.96775e-09	0.589573	0.826	0.555	0.271	4.07068e-05	Chondrocytes
Ivns1abp	3.84271e-09	0.501576	0.844	0.593	0.251	7.94942e-05	Chondrocytes
Wnt4	2.0455e-08	0.663488	0.587	0.331	0.256	0.000423152	Chondrocytes
Lmnb1	6.72353e-40	1.51738	0.798	0.157	0.641	1.3909e-35	Proliferating chdonrocytes
Pclaf	9.29148e-34	1.35473	0.525	0.039	0.486	1.92213e-29	Proliferating chdonrocytes
Gmnn	2.43389e-32	0.655472	0.545	0.051	0.494	5.03498e-28	Proliferating chdonrocytes
Cxcr4	8.13997e-32	0.836589	0.566	0.06	0.506	1.68392e-27	Proliferating chdonrocytes
Rrm2	4.21018e-31	0.83951	0.535	0.051	0.484	8.7096e-27	Proliferating chdonrocytes
Birc5	5.76981e-31	1.21657	0.545	0.057	0.488	1.1936e-26	Proliferating chdonrocytes
Mki67	1.09647e-30	1.99731	0.636	0.115	0.521	2.26826e-26	Proliferating chdonrocytes
Ccna2	1.11803e-30	0.563818	0.444	0.021	0.423	2.31286e-26	Proliferating chdonrocytes
Ucp2	3.38904e-30	1.36731	0.697	0.166	0.531	7.01091e-26	Proliferating chdonrocytes
Top2a	1.21608e-29	1.57494	0.596	0.1	0.496	2.5157e-25	Proliferating chdonrocytes
Hmgb2	4.84939e-29	2.25943	0.949	0.625	0.324	1.00319e-24	Proliferating chdonrocytes
Gmfg	1.5896e-28	1.29634	0.626	0.121	0.505	3.2884e-24	Proliferating chdonrocytes
Pbk	3.91147e-28	0.610627	0.414	0.021	0.393	8.09165e-24	Proliferating chdonrocytes
Cd14	7.40786e-28	1.53593	0.535	0.073	0.462	1.53246e-23	Proliferating chdonrocytes
Dck	7.968e-27	0.509819	0.566	0.082	0.484	1.64834e-22	Proliferating chdonrocytes
Coro1a	8.95357e-27	1.73439	0.657	0.169	0.488	1.85222e-22	Proliferating chdonrocytes
Knl1	1.00219e-26	0.543152	0.424	0.03	0.394	2.07323e-22	Proliferating chdonrocytes
Cenpa	1.78799e-26	0.91674	0.596	0.106	0.49	3.69882e-22	Proliferating chdonrocytes
Cd52	3.29645e-26	1.5627	0.636	0.145	0.491	6.81937e-22	Proliferating chdonrocytes
Smc2	8.73356e-26	0.995708	0.596	0.115	0.481	1.80671e-21	Proliferating chdonrocytes
Clspn	1.86379e-25	0.600746	0.465	0.048	0.417	3.85562e-21	Proliferating chdonrocytes
Ptprc	7.08654e-25	0.987892	0.596	0.112	0.484	1.46599e-20	Proliferating chdonrocytes
Cdca8	8.20925e-25	0.782731	0.424	0.039	0.385	1.69825e-20	Proliferating chdonrocytes
Rac2	8.74779e-25	1.21566	0.576	0.121	0.455	1.80966e-20	Proliferating chdonrocytes
Hist1h2ae	1.10775e-24	1.70404	0.495	0.069	0.426	2.2916e-20	Proliferating chdonrocytes
Lockd	1.29906e-24	0.520658	0.515	0.073	0.442	2.68736e-20	Proliferating chdonrocytes
Cd37	1.52645e-24	0.654538	0.525	0.079	0.446	3.15776e-20	Proliferating chdonrocytes
Esco2	1.7845e-24	0.570683	0.374	0.021	0.353	3.69159e-20	Proliferating chdonrocytes
Hmmr	2.43748e-24	0.561098	0.404	0.03	0.374	5.04242e-20	Proliferating chdonrocytes
Kif11	2.54593e-24	0.567089	0.424	0.039	0.385	5.26676e-20	Proliferating chdonrocytes
Arhgap30	3.97751e-24	0.712322	0.495	0.073	0.422	8.22827e-20	Proliferating chdonrocytes
Spc24	5.54314e-24	0.707787	0.495	0.076	0.419	1.14671e-19	Proliferating chdonrocytes
Hist1h2ap	6.13066e-24	2.1038	0.545	0.106	0.439	1.26825e-19	Proliferating chdonrocytes
Tyms	9.26083e-24	0.622932	0.495	0.076	0.419	1.91579e-19	Proliferating chdonrocytes
Prg4	1.045e-23	5.95521	0.485	0.079	0.406	2.1618e-19	Proliferating chdonrocytes
Ube2c	1.14216e-23	1.37905	0.576	0.121	0.455	2.36279e-19	Proliferating chdonrocytes
Stmn1	1.22961e-23	1.9568	0.667	0.215	0.452	2.54369e-19	Proliferating chdonrocytes
Uhrf1	1.39206e-23	0.627458	0.525	0.085	0.44	2.87976e-19	Proliferating chdonrocytes
Ptpn18	2.45925e-23	0.709933	0.495	0.076	0.419	5.08745e-19	Proliferating chdonrocytes
Cd53	4.04773e-23	0.844662	0.545	0.109	0.436	8.37353e-19	Proliferating chdonrocytes
Lig1	4.26069e-23	0.799314	0.535	0.106	0.429	8.81409e-19	Proliferating chdonrocytes
Ikzf1	4.53625e-23	0.591402	0.485	0.073	0.412	9.38413e-19	Proliferating chdonrocytes
Cdk1	4.65392e-23	0.657404	0.475	0.069	0.406	9.62757e-19	Proliferating chdonrocytes
Cdca3	5.23055e-23	0.646851	0.434	0.048	0.386	1.08204e-18	Proliferating chdonrocytes
Rrm1	1.35565e-22	0.701278	0.596	0.148	0.448	2.80444e-18	Proliferating chdonrocytes
Sh3bgrl3	1.56436e-22	1.41969	0.949	0.583	0.366	3.2362e-18	Proliferating chdonrocytes
Samsn1	2.21954e-22	0.975121	0.475	0.073	0.402	4.59156e-18	Proliferating chdonrocytes
Laptm5	2.24063e-22	1.02549	0.626	0.169	0.457	4.63518e-18	Proliferating chdonrocytes
Cytip	4.37249e-22	0.737501	0.515	0.088	0.427	9.04538e-18	Proliferating chdonrocytes
Mcm5	9.95228e-22	0.512869	0.455	0.063	0.392	2.05883e-17	Proliferating chdonrocytes
Tspo	1.10285e-21	1.20834	0.798	0.35	0.448	2.28147e-17	Proliferating chdonrocytes
Chst3	1.56117e-21	0.653253	0.404	0.045	0.359	3.22958e-17	Proliferating chdonrocytes
Cks2	2.13838e-21	1.22985	0.818	0.384	0.434	4.42367e-17	Proliferating chdonrocytes
Slfn2	2.56863e-21	0.971559	0.495	0.091	0.404	5.31373e-17	Proliferating chdonrocytes
Nusap1	2.77843e-21	0.554932	0.394	0.042	0.352	5.74773e-17	Proliferating chdonrocytes
Cyba	2.92794e-21	1.57719	0.889	0.462	0.427	6.05703e-17	Proliferating chdonrocytes
Tmpo	3.55246e-21	0.748644	0.657	0.215	0.442	7.34897e-17	Proliferating chdonrocytes
Hist1h2ab	3.69545e-21	0.783821	0.384	0.039	0.345	7.64477e-17	Proliferating chdonrocytes
Alox5ap	5.14012e-21	1.47209	0.515	0.115	0.4	1.06334e-16	Proliferating chdonrocytes
Mcm3	6.52869e-21	0.6756	0.485	0.085	0.4	1.35059e-16	Proliferating chdonrocytes
Rbm38	6.53785e-21	0.538948	0.475	0.079	0.396	1.35248e-16	Proliferating chdonrocytes
Hist1h3c	7.08228e-21	0.633611	0.354	0.027	0.327	1.46511e-16	Proliferating chdonrocytes
Topbp1	8.07105e-21	0.58002	0.505	0.106	0.399	1.66966e-16	Proliferating chdonrocytes
Htra4	1.35247e-20	0.863376	0.273	0.006	0.267	2.79785e-16	Proliferating chdonrocytes
Hist1h1a	1.63898e-20	0.680725	0.343	0.027	0.316	3.39056e-16	Proliferating chdonrocytes
E2f2	2.14252e-20	0.661696	0.404	0.051	0.353	4.43224e-16	Proliferating chdonrocytes
Mcm6	2.22987e-20	0.675347	0.556	0.139	0.417	4.61293e-16	Proliferating chdonrocytes
Rad21	5.31591e-20	0.74927	0.788	0.356	0.432	1.0997e-15	Proliferating chdonrocytes
Napsa	5.63411e-20	0.623192	0.384	0.045	0.339	1.16553e-15	Proliferating chdonrocytes
Ncapg2	6.93448e-20	0.606193	0.465	0.082	0.383	1.43454e-15	Proliferating chdonrocytes
Prc1	8.24521e-20	0.813313	0.444	0.076	0.368	1.70569e-15	Proliferating chdonrocytes
Tyrobp	9.87844e-20	1.84373	0.566	0.148	0.418	2.04355e-15	Proliferating chdonrocytes
Hmgn2	1.10988e-19	1.44062	0.798	0.474	0.324	2.296e-15	Proliferating chdonrocytes
Slc16a3	1.13393e-19	0.628825	0.566	0.139	0.427	2.34576e-15	Proliferating chdonrocytes
Tpx2	1.85468e-19	0.669469	0.475	0.094	0.381	3.83677e-15	Proliferating chdonrocytes
Cenpf	2.79937e-19	0.851735	0.414	0.06	0.354	5.79106e-15	Proliferating chdonrocytes
Hist1h1b	3.43981e-19	1.89799	0.475	0.094	0.381	7.11594e-15	Proliferating chdonrocytes
Taldo1	3.51146e-19	0.878771	0.97	0.686	0.284	7.26416e-15	Proliferating chdonrocytes
Lbr	4.51339e-19	0.624189	0.737	0.314	0.423	9.33685e-15	Proliferating chdonrocytes
Ncf4	5.89203e-19	0.727011	0.485	0.103	0.382	1.21888e-14	Proliferating chdonrocytes
Ccnb2	6.25899e-19	0.577261	0.374	0.045	0.329	1.2948e-14	Proliferating chdonrocytes
Gpsm3	6.32598e-19	0.629955	0.465	0.091	0.374	1.30866e-14	Proliferating chdonrocytes
Ncf1	8.34976e-19	1.03211	0.444	0.088	0.356	1.72731e-14	Proliferating chdonrocytes
Fam107b	1.0095e-18	0.705183	0.556	0.148	0.408	2.08835e-14	Proliferating chdonrocytes
Srgn	1.08929e-18	2.20559	0.778	0.399	0.379	2.25342e-14	Proliferating chdonrocytes
Arhgdib	2.80541e-18	1.64395	0.677	0.269	0.408	5.80355e-14	Proliferating chdonrocytes
Ncf2	3.16932e-18	0.885426	0.455	0.094	0.361	6.55637e-14	Proliferating chdonrocytes
Igsf6	3.31985e-18	0.623038	0.313	0.027	0.286	6.86777e-14	Proliferating chdonrocytes
Mcm7	3.71269e-18	0.631855	0.576	0.175	0.401	7.68044e-14	Proliferating chdonrocytes
Tubb5	7.72724e-18	1.63897	0.818	0.508	0.31	1.59853e-13	Proliferating chdonrocytes
Grk2	7.90966e-18	0.592615	0.717	0.293	0.424	1.63627e-13	Proliferating chdonrocytes
Tuba1b	1.44983e-17	1.15951	0.838	0.489	0.349	2.99926e-13	Proliferating chdonrocytes
Git2	2.23847e-17	0.586865	0.606	0.199	0.407	4.63072e-13	Proliferating chdonrocytes
Cybb	2.69614e-17	1.58065	0.414	0.076	0.338	5.5775e-13	Proliferating chdonrocytes
Tagln2	2.99939e-17	0.94826	0.707	0.278	0.429	6.20483e-13	Proliferating chdonrocytes
Slc38a1	3.38726e-17	0.823434	0.606	0.19	0.416	7.00722e-13	Proliferating chdonrocytes
Rgs2	4.11403e-17	0.709034	0.525	0.13	0.395	8.51068e-13	Proliferating chdonrocytes
Fxyd5	6.16874e-17	1.22758	0.899	0.568	0.331	1.27613e-12	Proliferating chdonrocytes
Cilp	6.20309e-17	4.12987	0.404	0.079	0.325	1.28323e-12	Proliferating chdonrocytes
Spi1	8.15495e-17	0.621073	0.404	0.079	0.325	1.68702e-12	Proliferating chdonrocytes
Usp1	1.16365e-16	0.666478	0.616	0.248	0.368	2.40725e-12	Proliferating chdonrocytes
Plac8	1.52597e-16	1.89273	0.576	0.196	0.38	3.15678e-12	Proliferating chdonrocytes
Fbxo5	2.03869e-16	0.553795	0.303	0.03	0.273	4.21744e-12	Proliferating chdonrocytes
Chchd10	2.10259e-16	0.828038	0.424	0.085	0.339	4.34962e-12	Proliferating chdonrocytes
Pou2f2	2.1777e-16	0.53091	0.293	0.027	0.266	4.505e-12	Proliferating chdonrocytes
Clic1	2.53947e-16	0.938693	0.899	0.64	0.259	5.25341e-12	Proliferating chdonrocytes
Cotl1	2.54938e-16	0.813585	0.657	0.263	0.394	5.27391e-12	Proliferating chdonrocytes
Pcna	5.52266e-16	0.62675	0.768	0.423	0.345	1.14247e-11	Proliferating chdonrocytes
Cdk2ap2	7.53763e-16	0.590168	0.616	0.221	0.395	1.55931e-11	Proliferating chdonrocytes
Anp32e	1.0194e-15	0.721215	0.758	0.468	0.29	2.10883e-11	Proliferating chdonrocytes
Cd47	1.16917e-15	0.869952	0.899	0.586	0.313	2.41866e-11	Proliferating chdonrocytes
Rhoh	1.29683e-15	0.650635	0.364	0.06	0.304	2.68275e-11	Proliferating chdonrocytes
Ptprcap	1.32413e-15	0.686702	0.374	0.066	0.308	2.73923e-11	Proliferating chdonrocytes
Sell	1.76471e-15	0.505404	0.303	0.036	0.267	3.65065e-11	Proliferating chdonrocytes
Lyn	1.89351e-15	0.577357	0.465	0.124	0.341	3.91711e-11	Proliferating chdonrocytes
Zfp367	1.90343e-15	0.526664	0.495	0.139	0.356	3.93762e-11	Proliferating chdonrocytes
Gda	2.54779e-15	0.59995	0.374	0.073	0.301	5.27062e-11	Proliferating chdonrocytes
Fam53b	3.36405e-15	0.58862	0.444	0.106	0.338	6.9592e-11	Proliferating chdonrocytes
Itgam	3.75378e-15	0.518383	0.354	0.06	0.294	7.76544e-11	Proliferating chdonrocytes
Fam49b	4.04692e-15	0.704968	0.747	0.35	0.397	8.37187e-11	Proliferating chdonrocytes
Itgb2	4.41677e-15	0.661198	0.404	0.085	0.319	9.13697e-11	Proliferating chdonrocytes
Ly6e	4.64743e-15	1.08065	0.657	0.281	0.376	9.61413e-11	Proliferating chdonrocytes
Card19	5.14034e-15	0.673266	0.727	0.344	0.383	1.06338e-10	Proliferating chdonrocytes
Lcp1	5.39865e-15	1.24857	0.535	0.196	0.339	1.11682e-10	Proliferating chdonrocytes
Neurl3	6.05506e-15	0.777189	0.404	0.082	0.322	1.25261e-10	Proliferating chdonrocytes
Tnfaip8	6.50182e-15	0.586808	0.626	0.23	0.396	1.34503e-10	Proliferating chdonrocytes
Atad2	7.01896e-15	0.676346	0.535	0.175	0.36	1.45201e-10	Proliferating chdonrocytes
Fcer1g	9.06351e-15	1.25442	0.495	0.151	0.344	1.87497e-10	Proliferating chdonrocytes
Hist1h1e	2.15718e-14	1.06998	0.768	0.411	0.357	4.46255e-10	Proliferating chdonrocytes
Arpc3	2.2288e-14	0.912422	0.96	0.707	0.253	4.61072e-10	Proliferating chdonrocytes
Cks1b	2.33861e-14	0.782282	0.586	0.248	0.338	4.83788e-10	Proliferating chdonrocytes
Mxd1	2.50909e-14	1.02334	0.586	0.224	0.362	5.19055e-10	Proliferating chdonrocytes
Plek	2.5712e-14	0.760437	0.394	0.088	0.306	5.31904e-10	Proliferating chdonrocytes
Dnajc9	2.64522e-14	0.628942	0.576	0.239	0.337	5.47216e-10	Proliferating chdonrocytes
Capg	2.7663e-14	0.803186	0.657	0.278	0.379	5.72264e-10	Proliferating chdonrocytes
Mcemp1	2.80358e-14	1.0173	0.313	0.048	0.265	5.79976e-10	Proliferating chdonrocytes
Supt4a	2.87785e-14	0.526564	0.808	0.468	0.34	5.95342e-10	Proliferating chdonrocytes
H2afx	3.42598e-14	0.819787	0.586	0.251	0.335	7.08732e-10	Proliferating chdonrocytes
Cd24a	3.62573e-14	0.963885	0.879	0.465	0.414	7.50054e-10	Proliferating chdonrocytes
Sp140	3.67171e-14	0.612746	0.384	0.085	0.299	7.59567e-10	Proliferating chdonrocytes
Hdc	5.26352e-14	1.24454	0.343	0.066	0.277	1.08887e-09	Proliferating chdonrocytes
Wfdc21	5.5603e-14	1.84781	0.384	0.082	0.302	1.15026e-09	Proliferating chdonrocytes
Grina	5.72049e-14	0.930636	0.616	0.269	0.347	1.1834e-09	Proliferating chdonrocytes
Orc6	6.46992e-14	0.512074	0.545	0.205	0.34	1.33843e-09	Proliferating chdonrocytes
Tlr2	6.63285e-14	0.714103	0.374	0.079	0.295	1.37214e-09	Proliferating chdonrocytes
Ndufa4l2	8.45867e-14	1.10804	0.646	0.266	0.38	1.74984e-09	Proliferating chdonrocytes
Tkt	8.53714e-14	0.855682	0.919	0.613	0.306	1.76608e-09	Proliferating chdonrocytes
Il1r2	9.37761e-14	1.19994	0.364	0.076	0.288	1.93995e-09	Proliferating chdonrocytes
Rnaseh2c	1.67685e-13	0.601752	0.707	0.369	0.338	3.4689e-09	Proliferating chdonrocytes
Ostf1	2.34309e-13	0.675877	0.859	0.55	0.309	4.84714e-09	Proliferating chdonrocytes
Sod3	3.66423e-13	0.694919	0.323	0.057	0.266	7.58019e-09	Proliferating chdonrocytes
Tnfaip3	4.27293e-13	0.736268	0.495	0.16	0.335	8.8394e-09	Proliferating chdonrocytes
Tipin	5.48349e-13	0.589332	0.576	0.254	0.322	1.13437e-08	Proliferating chdonrocytes
Ezh2	5.53875e-13	0.593625	0.616	0.26	0.356	1.1458e-08	Proliferating chdonrocytes
Vdac2	5.95556e-13	0.510847	0.919	0.637	0.282	1.23203e-08	Proliferating chdonrocytes
Abracl	6.13342e-13	0.651148	0.687	0.35	0.337	1.26882e-08	Proliferating chdonrocytes
Limd2	8.86559e-13	0.679164	0.616	0.269	0.347	1.83403e-08	Proliferating chdonrocytes
Smc4	1.15583e-12	1.02524	0.697	0.444	0.253	2.39107e-08	Proliferating chdonrocytes
Atp6ap2	1.1565e-12	0.557719	0.758	0.429	0.329	2.39246e-08	Proliferating chdonrocytes
Plp2	1.44311e-12	0.611666	0.727	0.408	0.319	2.98535e-08	Proliferating chdonrocytes
Slc7a11	2.26536e-12	0.841551	0.323	0.066	0.257	4.68636e-08	Proliferating chdonrocytes
Lrmp	2.34454e-12	0.514916	0.323	0.066	0.257	4.85015e-08	Proliferating chdonrocytes
S100a4	2.35655e-12	1.26163	0.465	0.142	0.323	4.875e-08	Proliferating chdonrocytes
Cmtm7	3.96008e-12	0.813652	0.737	0.459	0.278	8.19221e-08	Proliferating chdonrocytes
Bub3	4.15275e-12	0.54678	0.667	0.35	0.317	8.5908e-08	Proliferating chdonrocytes
Ptbp3	4.36995e-12	0.545849	0.899	0.647	0.252	9.04012e-08	Proliferating chdonrocytes
Lilr4b	5.68239e-12	0.811838	0.455	0.151	0.304	1.17552e-07	Proliferating chdonrocytes
Siva1	7.84221e-12	0.69035	0.687	0.423	0.264	1.62232e-07	Proliferating chdonrocytes
Dut	8.42545e-12	1.01039	0.646	0.378	0.268	1.74297e-07	Proliferating chdonrocytes
H2afy	8.56852e-12	1.05873	0.828	0.562	0.266	1.77257e-07	Proliferating chdonrocytes
Prdx6	8.73843e-12	0.838338	0.828	0.553	0.275	1.80772e-07	Proliferating chdonrocytes
Msrb1	9.25425e-12	1.01146	0.646	0.335	0.311	1.91443e-07	Proliferating chdonrocytes
Tpd52	1.16416e-11	0.716292	0.566	0.233	0.333	2.40829e-07	Proliferating chdonrocytes
Ninj1	1.23194e-11	0.797364	0.677	0.338	0.339	2.54852e-07	Proliferating chdonrocytes
Jpt1	1.45e-11	0.5175	0.788	0.441	0.347	2.99962e-07	Proliferating chdonrocytes
Clec4e	1.48717e-11	0.730872	0.364	0.091	0.273	3.07651e-07	Proliferating chdonrocytes
Prr13	1.52744e-11	0.687308	0.687	0.344	0.343	3.15981e-07	Proliferating chdonrocytes
Ighm	2.20489e-11	1.39095	0.515	0.205	0.31	4.56125e-07	Proliferating chdonrocytes
Arpc5	2.3113e-11	0.60403	0.929	0.656	0.273	4.78138e-07	Proliferating chdonrocytes
Pglyrp1	2.34601e-11	1.55668	0.354	0.097	0.257	4.8532e-07	Proliferating chdonrocytes
Suz12	2.40207e-11	0.50052	0.636	0.329	0.307	4.96917e-07	Proliferating chdonrocytes
Sec11c	3.64733e-11	0.653221	0.798	0.535	0.263	7.54522e-07	Proliferating chdonrocytes
Tubb4b	6.77626e-11	0.650627	0.869	0.586	0.283	1.4018e-06	Proliferating chdonrocytes
Tnfrsf13c	7.852e-11	0.697736	0.354	0.091	0.263	1.62434e-06	Proliferating chdonrocytes
Cd79b	1.22266e-10	0.956109	0.364	0.103	0.261	2.52931e-06	Proliferating chdonrocytes
Cilp2	1.30374e-10	1.796	0.535	0.236	0.299	2.69705e-06	Proliferating chdonrocytes
Slbp	1.94774e-10	0.626779	0.697	0.417	0.28	4.02929e-06	Proliferating chdonrocytes
Arpc2	2.20406e-10	0.616667	0.99	0.719	0.271	4.55953e-06	Proliferating chdonrocytes
Bri3	2.79188e-10	0.510176	0.889	0.637	0.252	5.77557e-06	Proliferating chdonrocytes
Zcchc6	3.04866e-10	0.652137	0.848	0.559	0.289	6.30676e-06	Proliferating chdonrocytes
Tmem131l	4.50021e-10	0.514024	0.404	0.136	0.268	9.30959e-06	Proliferating chdonrocytes
Tuba4a	7.16975e-10	0.517061	0.505	0.211	0.294	1.48321e-05	Proliferating chdonrocytes
Pgk1	9.92649e-10	0.554942	0.879	0.583	0.296	2.05349e-05	Proliferating chdonrocytes
Gas1	1.6032e-09	1.25884	0.465	0.181	0.284	3.31655e-05	Proliferating chdonrocytes
Foxp1	1.6941e-09	0.620771	0.626	0.32	0.306	3.50458e-05	Proliferating chdonrocytes
Slc20a1	2.84718e-09	0.509156	0.747	0.42	0.327	5.88996e-05	Proliferating chdonrocytes
Crip2	5.62462e-09	0.681083	0.667	0.363	0.304	0.000116357	Proliferating chdonrocytes
St3gal5	9.32676e-09	0.564175	0.576	0.302	0.274	0.000192943	Proliferating chdonrocytes
Arl6ip1	1.21853e-08	0.587703	0.717	0.453	0.264	0.000252077	Proliferating chdonrocytes
G0s2	1.27441e-08	1.86456	0.515	0.224	0.291	0.000263637	Proliferating chdonrocytes
Cdon	1.38227e-08	0.648825	0.475	0.224	0.251	0.000285951	Proliferating chdonrocytes
Cdkn2d	3.00318e-08	0.507811	0.646	0.375	0.271	0.000621267	Proliferating chdonrocytes
Blvrb	4.34759e-08	0.945551	0.657	0.405	0.252	0.000899386	Proliferating chdonrocytes
Litaf	5.20761e-08	0.516581	0.717	0.462	0.255	0.0010773	Proliferating chdonrocytes
N4bp1	7.86547e-08	0.503227	0.475	0.215	0.26	0.00162713	Proliferating chdonrocytes
Pim1	2.99912e-07	0.608223	0.808	0.547	0.261	0.00620428	Proliferating chdonrocytes
Lgals3	4.23085e-07	0.577811	0.929	0.631	0.298	0.00875237	Proliferating chdonrocytes
Gsr	1.73901e-06	0.514413	0.677	0.417	0.26	0.0359748	Proliferating chdonrocytes
Col10a1	3.30439e-69	7.11697	0.975	0.038	0.937	6.83578e-65	HC/pre-HC
Ihh	2.88326e-68	2.98584	0.95	0.033	0.917	5.96461e-64	HC/pre-HC
Wnk4	7.62976e-62	1.40781	0.95	0.046	0.904	1.57837e-57	HC/pre-HC
Gm45397	2.6902e-53	0.658708	0.775	0.026	0.749	5.56522e-49	HC/pre-HC
Pla2g10	6.37521e-51	1.00441	0.55	0	0.55	1.31884e-46	HC/pre-HC
Nrgn	1.87876e-48	2.24969	0.925	0.085	0.84	3.8866e-44	HC/pre-HC
Gmpr	1.97512e-46	1.19044	0.825	0.056	0.769	4.08594e-42	HC/pre-HC
Cds1	1.19199e-41	0.701516	0.725	0.041	0.684	2.46587e-37	HC/pre-HC
Slco2b1	3.99886e-39	0.547901	0.625	0.026	0.599	8.27244e-35	HC/pre-HC
Matn1	1.99193e-37	2.81864	0.9	0.126	0.774	4.1207e-33	HC/pre-HC
Aldh1a3	6.31043e-36	2.00581	0.775	0.079	0.696	1.30544e-31	HC/pre-HC
Grb14	1.3834e-34	1.44613	1	0.179	0.821	2.86183e-30	HC/pre-HC
Enc1	2.62702e-34	1.02749	0.775	0.077	0.698	5.43451e-30	HC/pre-HC
Slc38a4	3.53727e-34	0.829588	0.825	0.097	0.728	7.31756e-30	HC/pre-HC
Enpp2	7.14869e-34	2.28883	1	0.249	0.751	1.47885e-29	HC/pre-HC
Irx5	7.42115e-33	1.07274	0.875	0.115	0.76	1.53521e-28	HC/pre-HC
Loxl4	1.07788e-32	2.42053	1	0.244	0.756	2.22981e-28	HC/pre-HC
Krtap17-1	1.90653e-32	1.73016	0.35	0	0.35	3.94404e-28	HC/pre-HC
Hpgd	1.04735e-31	1.82265	0.9	0.138	0.762	2.16665e-27	HC/pre-HC
Nim1k	4.14836e-31	0.878062	0.8	0.105	0.695	8.58171e-27	HC/pre-HC
Ptges3l	1.01777e-30	0.907176	0.875	0.138	0.737	2.10547e-26	HC/pre-HC
Foxa2	3.11215e-30	0.609354	0.65	0.059	0.591	6.43811e-26	HC/pre-HC
Bmp8a	3.20183e-30	0.811802	0.85	0.128	0.722	6.62362e-26	HC/pre-HC
Bmp6	1.48897e-28	0.624217	0.825	0.103	0.722	3.08024e-24	HC/pre-HC
Stc2	3.14263e-28	1.10773	0.85	0.149	0.701	6.50115e-24	HC/pre-HC
Ddit4l	1.04036e-27	1.66303	0.95	0.197	0.753	2.15219e-23	HC/pre-HC
Pank1	1.15083e-27	0.657845	0.85	0.131	0.719	2.38072e-23	HC/pre-HC
Eps8l2	2.58466e-27	1.32359	1	0.323	0.677	5.3469e-23	HC/pre-HC
F5	2.19137e-26	1.0064	0.95	0.179	0.771	4.53328e-22	HC/pre-HC
Wnt5b	3.12129e-26	0.659457	0.8	0.138	0.662	6.45701e-22	HC/pre-HC
Cdkn1c	9.8216e-26	3.44918	0.975	0.369	0.606	2.03179e-21	HC/pre-HC
Fxyd3	1.93696e-25	2.19547	1	0.313	0.687	4.007e-21	HC/pre-HC
Ccdc80	2.7871e-25	2.65313	1	0.71	0.29	5.76567e-21	HC/pre-HC
Panx3	3.29678e-25	1.77083	0.925	0.215	0.71	6.82006e-21	HC/pre-HC
Pth1r	2.43932e-23	2.84739	1	0.682	0.318	5.04623e-19	HC/pre-HC
Wipi1	5.92491e-23	0.870371	1	0.341	0.659	1.22569e-18	HC/pre-HC
Cd200	6.47571e-23	1.17664	1	0.313	0.687	1.33963e-18	HC/pre-HC
Pcolce2	7.68403e-23	2.918	1	0.536	0.464	1.5896e-18	HC/pre-HC
Dhx58os	1.58952e-22	1.22202	0.975	0.321	0.654	3.28824e-18	HC/pre-HC
Cystm1	1.89193e-22	0.757554	0.875	0.195	0.68	3.91385e-18	HC/pre-HC
Alpl	1.97738e-22	2.18901	1	0.526	0.474	4.0906e-18	HC/pre-HC
3110079O15Rik	2.4603e-22	1.99165	1	0.608	0.392	5.08962e-18	HC/pre-HC
Rhod	3.81732e-22	0.597263	0.75	0.133	0.617	7.89688e-18	HC/pre-HC
Il17d	8.11475e-22	1.66725	0.975	0.382	0.593	1.6787e-17	HC/pre-HC
F13a1	1.38008e-21	1.85503	0.9	0.249	0.651	2.85498e-17	HC/pre-HC
Serinc5	1.78403e-21	1.36779	0.95	0.351	0.599	3.69063e-17	HC/pre-HC
Map1lc3a	4.42118e-21	1.91846	1	0.697	0.303	9.14609e-17	HC/pre-HC
Atp1b3	4.5761e-21	1.9191	1	0.703	0.297	9.46659e-17	HC/pre-HC
Tspan13	7.14165e-21	1.126	0.95	0.287	0.663	1.47739e-16	HC/pre-HC
Spon2	1.28718e-20	0.882699	0.6	0.085	0.515	2.66279e-16	HC/pre-HC
Spa17	2.32838e-20	0.505209	0.7	0.123	0.577	4.81673e-16	HC/pre-HC
Tnni2	2.43534e-20	2.30997	0.85	0.238	0.612	5.038e-16	HC/pre-HC
Phtf2	3.87321e-20	0.636303	0.925	0.241	0.684	8.01251e-16	HC/pre-HC
Scube1	8.92001e-20	0.511588	0.875	0.179	0.696	1.84528e-15	HC/pre-HC
Capn6	1.55609e-19	0.989374	0.875	0.254	0.621	3.21908e-15	HC/pre-HC
Crybg3	1.84367e-19	0.95008	0.925	0.31	0.615	3.81401e-15	HC/pre-HC
Chad	2.36219e-19	1.75899	1	0.618	0.382	4.88665e-15	HC/pre-HC
Gnb4	6.52735e-19	0.959107	0.925	0.295	0.63	1.35031e-14	HC/pre-HC
Anxa8	7.63589e-19	1.51269	0.975	0.428	0.547	1.57964e-14	HC/pre-HC
Tcf7l2	9.19922e-19	1.46802	0.9	0.323	0.577	1.90304e-14	HC/pre-HC
Pak3	1.17934e-18	0.678827	0.725	0.151	0.574	2.43971e-14	HC/pre-HC
Mef2c	1.48655e-18	1.65418	1	0.49	0.51	3.07523e-14	HC/pre-HC
Nt5dc1	1.89613e-18	0.523492	0.65	0.108	0.542	3.92253e-14	HC/pre-HC
Fxyd2	2.09444e-18	1.87557	1	0.441	0.559	4.33277e-14	HC/pre-HC
Unc5b	3.03096e-18	0.843566	0.975	0.341	0.634	6.27014e-14	HC/pre-HC
Phex	5.18418e-18	0.601616	0.725	0.133	0.592	1.07245e-13	HC/pre-HC
Tgfb3	1.12407e-17	0.533313	0.875	0.226	0.649	2.32537e-13	HC/pre-HC
Prkg2	1.53126e-17	1.13775	0.95	0.336	0.614	3.16772e-13	HC/pre-HC
Ibsp	1.58812e-17	2.77978	0.9	0.295	0.605	3.28534e-13	HC/pre-HC
Hapln1	1.72609e-17	1.80603	1	0.646	0.354	3.57077e-13	HC/pre-HC
Ptp4a1	2.49885e-17	1.27965	1	0.744	0.256	5.16936e-13	HC/pre-HC
Foxa3	2.9959e-17	0.6739	0.8	0.213	0.587	6.19762e-13	HC/pre-HC
Lxn	3.32743e-17	0.800279	0.95	0.313	0.637	6.88346e-13	HC/pre-HC
Il17b	3.43877e-17	1.38055	0.925	0.315	0.61	7.11378e-13	HC/pre-HC
Isg20	5.20704e-17	0.576151	0.9	0.249	0.651	1.07718e-12	HC/pre-HC
Ptgis	7.72665e-17	1.03475	1	0.338	0.662	1.59841e-12	HC/pre-HC
Lgmn	9.28954e-17	1.14388	0.95	0.495	0.455	1.92173e-12	HC/pre-HC
S100a13	1.52208e-16	1.23421	1	0.728	0.272	3.14872e-12	HC/pre-HC
Efemp2	1.63137e-16	1.15762	0.975	0.564	0.411	3.37481e-12	HC/pre-HC
Slc8a3	1.88335e-16	0.829717	0.9	0.269	0.631	3.89608e-12	HC/pre-HC
Shisa4	3.18837e-16	1.19921	1	0.5	0.5	6.59579e-12	HC/pre-HC
Smpd3	3.45828e-16	1.77791	0.95	0.515	0.435	7.15414e-12	HC/pre-HC
Cgref1	4.16268e-16	1.01791	0.975	0.385	0.59	8.61134e-12	HC/pre-HC
Cpe	5.79055e-16	1.31885	1	0.726	0.274	1.19789e-11	HC/pre-HC
Pla2g16	8.40498e-16	0.576992	0.625	0.126	0.499	1.73874e-11	HC/pre-HC
AW112010	8.53895e-16	0.981155	0.55	0.092	0.458	1.76645e-11	HC/pre-HC
Fam43a	8.71782e-16	0.7201	0.7	0.172	0.528	1.80345e-11	HC/pre-HC
Col2a1	1.30865e-15	1.46376	1	0.713	0.287	2.7072e-11	HC/pre-HC
Stk39	2.28675e-15	0.772839	0.85	0.308	0.542	4.7306e-11	HC/pre-HC
Timp3	2.65663e-15	1.72193	1	0.541	0.459	5.49577e-11	HC/pre-HC
Tsc22d4	3.36675e-15	0.943258	1	0.546	0.454	6.96479e-11	HC/pre-HC
Comp	3.59548e-15	1.86733	1	0.721	0.279	7.43796e-11	HC/pre-HC
Mia	5.07165e-15	1.38987	1	0.551	0.449	1.04917e-10	HC/pre-HC
Pcsk6	8.81306e-15	1.0591	0.9	0.338	0.562	1.82316e-10	HC/pre-HC
Crispld1	9.27721e-15	1.33631	0.975	0.518	0.457	1.91918e-10	HC/pre-HC
Cab39	9.40924e-15	0.810291	0.975	0.508	0.467	1.94649e-10	HC/pre-HC
Ramp1	1.399e-14	0.548287	0.925	0.254	0.671	2.89412e-10	HC/pre-HC
Susd5	2.29785e-14	1.18043	1	0.572	0.428	4.75357e-10	HC/pre-HC
Rasd1	2.93561e-14	0.652869	0.8	0.218	0.582	6.07289e-10	HC/pre-HC
Asap2	3.17949e-14	0.596636	0.875	0.31	0.565	6.57742e-10	HC/pre-HC
Wscd2	4.36455e-14	0.660846	0.925	0.323	0.602	9.02895e-10	HC/pre-HC
Rala	6.21348e-14	0.658991	1	0.49	0.51	1.28538e-09	HC/pre-HC
Med9	8.88918e-14	0.501412	0.875	0.3	0.575	1.8389e-09	HC/pre-HC
Lzic	1.01213e-13	0.589265	0.725	0.21	0.515	2.09379e-09	HC/pre-HC
Slc13a5	1.03986e-13	1.15411	0.925	0.479	0.446	2.15115e-09	HC/pre-HC
Twsg1	1.15894e-13	0.717065	1	0.603	0.397	2.39751e-09	HC/pre-HC
Ntan1	1.25178e-13	0.783205	0.925	0.508	0.417	2.58955e-09	HC/pre-HC
Gsk3b	1.63087e-13	1.01352	1	0.595	0.405	3.37377e-09	HC/pre-HC
R3hdml	2.03696e-13	1.31288	0.6	0.136	0.464	4.21386e-09	HC/pre-HC
Ywhaq	2.63695e-13	1.13594	1	0.741	0.259	5.45507e-09	HC/pre-HC
Fbln7	3.15375e-13	0.749471	1	0.346	0.654	6.52417e-09	HC/pre-HC
Ugp2	3.53724e-13	0.813077	0.95	0.477	0.473	7.31749e-09	HC/pre-HC
1810058I24Rik	3.62482e-13	0.855377	1	0.687	0.313	7.49866e-09	HC/pre-HC
Slc25a36	4.21654e-13	0.654907	0.9	0.364	0.536	8.72275e-09	HC/pre-HC
Scn1b	4.63993e-13	0.754915	0.925	0.423	0.502	9.59863e-09	HC/pre-HC
Fdps	5.92501e-13	1.10466	0.925	0.405	0.52	1.22571e-08	HC/pre-HC
Arpc4	6.30741e-13	0.785621	1	0.574	0.426	1.30481e-08	HC/pre-HC
Enho	6.32788e-13	0.736965	0.825	0.29	0.535	1.30905e-08	HC/pre-HC
Fabp3	1.00923e-12	0.544641	0.525	0.105	0.42	2.08779e-08	HC/pre-HC
Cnnm4	1.05802e-12	0.594283	0.775	0.264	0.511	2.18874e-08	HC/pre-HC
Frzb	1.72763e-12	0.600794	0.675	0.185	0.49	3.57395e-08	HC/pre-HC
Chmp3	2.221e-12	0.561471	0.925	0.41	0.515	4.59457e-08	HC/pre-HC
Acan	2.41028e-12	1.19566	1	0.649	0.351	4.98614e-08	HC/pre-HC
Mien1	2.62074e-12	0.706722	0.975	0.513	0.462	5.42152e-08	HC/pre-HC
Oat	2.75283e-12	0.742926	1	0.654	0.346	5.69477e-08	HC/pre-HC
Smim5	2.81771e-12	0.965039	0.8	0.303	0.497	5.82899e-08	HC/pre-HC
Dynlrb1	2.86011e-12	0.667944	1	0.69	0.31	5.91672e-08	HC/pre-HC
Ppfibp1	4.50154e-12	0.510688	1	0.51	0.49	9.31233e-08	HC/pre-HC
Kras	6.24432e-12	0.781655	0.975	0.556	0.419	1.29176e-07	HC/pre-HC
Myo5a	6.31187e-12	0.578282	0.875	0.395	0.48	1.30574e-07	HC/pre-HC
Cd24a	6.59499e-12	0.813884	0.975	0.518	0.457	1.36431e-07	HC/pre-HC
Inppl1	1.10108e-11	0.507704	0.775	0.259	0.516	2.27779e-07	HC/pre-HC
Tmed1	1.35923e-11	0.576713	1	0.451	0.549	2.81183e-07	HC/pre-HC
Smim14	1.46193e-11	0.836214	1	0.667	0.333	3.02429e-07	HC/pre-HC
Cd164	1.52241e-11	0.934879	1	0.682	0.318	3.1494e-07	HC/pre-HC
Col9a3	1.75542e-11	1.25347	1	0.569	0.431	3.63143e-07	HC/pre-HC
Cfap36	2.02084e-11	0.633936	0.975	0.5	0.475	4.18051e-07	HC/pre-HC
Plagl1	2.02501e-11	0.514754	0.975	0.374	0.601	4.18914e-07	HC/pre-HC
Plcd1	2.03941e-11	0.599944	0.875	0.395	0.48	4.21893e-07	HC/pre-HC
Fam104a	3.37047e-11	0.687665	1	0.677	0.323	6.9725e-07	HC/pre-HC
Fam20c	3.52364e-11	1.44495	0.875	0.428	0.447	7.28935e-07	HC/pre-HC
Ccdc88a	3.70715e-11	0.815172	1	0.685	0.315	7.66899e-07	HC/pre-HC
Gtf2h5	4.34877e-11	0.575539	1	0.633	0.367	8.99631e-07	HC/pre-HC
Col9a1	4.87744e-11	1.15045	1	0.541	0.459	1.009e-06	HC/pre-HC
Col6a3	5.12994e-11	0.958777	1	0.721	0.279	1.06123e-06	HC/pre-HC
Arsi	6.60402e-11	1.02795	0.55	0.149	0.401	1.36617e-06	HC/pre-HC
Pop5	6.63593e-11	0.52144	0.9	0.39	0.51	1.37277e-06	HC/pre-HC
Col11a2	7.57018e-11	1.02851	1	0.738	0.262	1.56604e-06	HC/pre-HC
Col9a2	8.10383e-11	1.12027	1	0.59	0.41	1.67644e-06	HC/pre-HC
Rap1a	9.28135e-11	0.646077	0.975	0.615	0.36	1.92003e-06	HC/pre-HC
Enah	1.03005e-10	0.675989	0.975	0.531	0.444	2.13086e-06	HC/pre-HC
Trim47	1.68751e-10	0.530043	0.925	0.397	0.528	3.49096e-06	HC/pre-HC
Hspg2	1.74246e-10	0.819963	1	0.738	0.262	3.60462e-06	HC/pre-HC
Bmp2	1.75389e-10	1.2695	0.75	0.274	0.476	3.62828e-06	HC/pre-HC
Siah2	2.5604e-10	0.503488	0.8	0.297	0.503	5.29669e-06	HC/pre-HC
Timm8b	2.68042e-10	0.563571	1	0.59	0.41	5.54499e-06	HC/pre-HC
S100a1	2.7268e-10	0.741955	1	0.679	0.321	5.64094e-06	HC/pre-HC
Sgk1	3.86919e-10	1.03873	0.975	0.603	0.372	8.00419e-06	HC/pre-HC
Vamp8	4.04794e-10	0.684194	1	0.613	0.387	8.37397e-06	HC/pre-HC
Nrk	5.27984e-10	0.60732	0.925	0.405	0.52	1.09224e-05	HC/pre-HC
Idi1	6.08316e-10	0.778072	0.825	0.387	0.438	1.25842e-05	HC/pre-HC
Lbh	8.66348e-10	0.521957	0.975	0.454	0.521	1.79221e-05	HC/pre-HC
Pdcd10	9.49016e-10	0.53804	0.95	0.585	0.365	1.96323e-05	HC/pre-HC
Cdkn1a	1.23525e-09	1.39622	1	0.715	0.285	2.55535e-05	HC/pre-HC
Snhg18	1.60882e-09	0.619239	0.975	0.621	0.354	3.32817e-05	HC/pre-HC
Vapa	1.65194e-09	0.555791	1	0.708	0.292	3.41736e-05	HC/pre-HC
Scin	2.14645e-09	0.618614	0.775	0.336	0.439	4.44036e-05	HC/pre-HC
Otud1	2.44301e-09	0.52075	0.525	0.144	0.381	5.05386e-05	HC/pre-HC
Slc44a2	3.76956e-09	0.523326	0.925	0.497	0.428	7.7981e-05	HC/pre-HC
Tiparp	3.81564e-09	0.866853	0.95	0.626	0.324	7.89342e-05	HC/pre-HC
Mustn1	3.8351e-09	1.08316	0.55	0.164	0.386	7.93368e-05	HC/pre-HC
Bag1	4.56014e-09	0.672877	1	0.695	0.305	9.43356e-05	HC/pre-HC
Hcfc1r1	4.75944e-09	0.575227	0.975	0.551	0.424	9.84585e-05	HC/pre-HC
Mdh1	4.91791e-09	0.520623	1	0.613	0.387	0.000101737	HC/pre-HC
Dnajb1	5.3562e-09	1.2501	0.9	0.626	0.274	0.000110804	HC/pre-HC
St13	5.7999e-09	0.520788	1	0.621	0.379	0.000119983	HC/pre-HC
Cox6a1	5.99237e-09	0.575253	1	0.71	0.29	0.000123964	HC/pre-HC
Hilpda	6.24819e-09	1.04094	0.75	0.344	0.406	0.000129256	HC/pre-HC
Psmb5	6.524e-09	0.524999	1	0.669	0.331	0.000134962	HC/pre-HC
Cpne8	6.83552e-09	0.701161	0.95	0.497	0.453	0.000141406	HC/pre-HC
Peg3	9.27324e-09	0.920519	0.975	0.592	0.383	0.000191836	HC/pre-HC
Adk	1.12122e-08	0.639188	0.95	0.618	0.332	0.000231946	HC/pre-HC
Pdgfrl	1.27033e-08	0.675163	0.95	0.538	0.412	0.000262794	HC/pre-HC
Cox14	1.32412e-08	0.530348	0.975	0.651	0.324	0.00027392	HC/pre-HC
Flywch2	1.61234e-08	0.529698	0.675	0.256	0.419	0.000333544	HC/pre-HC
Uqcc2	1.62892e-08	0.571838	1	0.685	0.315	0.000336974	HC/pre-HC
Tgm2	1.63399e-08	0.876385	0.825	0.438	0.387	0.000338023	HC/pre-HC
Ppic	1.63473e-08	0.836521	1	0.738	0.262	0.000338177	HC/pre-HC
Lgals3	1.8444e-08	0.907328	1	0.669	0.331	0.000381551	HC/pre-HC
Ost4	2.31325e-08	0.690636	1	0.744	0.256	0.000478541	HC/pre-HC
Ubxn4	2.62133e-08	0.564077	1	0.703	0.297	0.000542275	HC/pre-HC
Smad7	3.23443e-08	0.923474	1	0.667	0.333	0.000669107	HC/pre-HC
Stk26	3.43512e-08	0.645634	0.85	0.474	0.376	0.000710624	HC/pre-HC
Epyc	4.76532e-08	0.579119	0.875	0.377	0.498	0.000985802	HC/pre-HC
Ndufc1	4.89549e-08	0.54531	1	0.633	0.367	0.00101273	HC/pre-HC
Usp53	6.97714e-08	0.541352	0.725	0.303	0.422	0.00144336	HC/pre-HC
Psmd8	7.42058e-08	0.503924	1	0.641	0.359	0.0015351	HC/pre-HC
Cdv3	7.65372e-08	0.612011	1	0.738	0.262	0.00158333	HC/pre-HC
Sdcbp	7.93307e-08	0.523768	1	0.674	0.326	0.00164111	HC/pre-HC
Eif3m	8.6552e-08	0.545218	0.95	0.654	0.296	0.0017905	HC/pre-HC
Emp2	9.53846e-08	0.509903	0.95	0.518	0.432	0.00197322	HC/pre-HC
Golph3	1.07531e-07	0.641824	0.975	0.669	0.306	0.0022245	HC/pre-HC
Msmo1	1.41147e-07	0.59111	0.825	0.392	0.433	0.00291991	HC/pre-HC
Sgms2	1.44855e-07	1.07814	0.975	0.641	0.334	0.00299662	HC/pre-HC
Akt2	1.56884e-07	0.52194	1	0.567	0.433	0.00324546	HC/pre-HC
Cox6b1	1.90491e-07	0.566591	1	0.749	0.251	0.00394069	HC/pre-HC
Mrps6	1.97483e-07	0.548019	0.925	0.551	0.374	0.00408534	HC/pre-HC
Gale	2.27637e-07	0.524454	0.8	0.362	0.438	0.00470913	HC/pre-HC
Uqcr10	2.55481e-07	0.500241	1	0.71	0.29	0.00528514	HC/pre-HC
Hmgcs1	4.21727e-07	0.54224	0.9	0.482	0.418	0.00872427	HC/pre-HC
Ppa1	4.31338e-07	1.16199	0.925	0.549	0.376	0.00892309	HC/pre-HC
Lmcd1	4.37164e-07	1.12788	0.7	0.318	0.382	0.00904361	HC/pre-HC
Cspg4	6.59988e-07	0.582059	1	0.667	0.333	0.0136532	HC/pre-HC
Nid2	7.2586e-07	0.593008	0.875	0.472	0.403	0.0150159	HC/pre-HC
Rgcc	1.02106e-06	0.723532	0.975	0.697	0.278	0.0211227	HC/pre-HC
Pacsin2	1.23491e-06	0.508241	0.9	0.544	0.356	0.0255467	HC/pre-HC
Gprc5a	1.33144e-06	0.502211	0.4	0.126	0.274	0.0275435	HC/pre-HC
Vegfa	1.56701e-06	1.01159	0.825	0.549	0.276	0.0324167	HC/pre-HC
Dpep1	1.12085e-67	2.18877	0.846	0.01	0.836	2.31871e-63	Immature Obs
Gdpd2	9.51943e-63	2.56076	0.962	0.025	0.937	1.96928e-58	Immature Obs
Lepr	5.17649e-54	2.78805	1	0.047	0.953	1.07086e-49	Immature Obs
Kng1	1.75523e-53	1.7135	0.731	0.012	0.719	3.63105e-49	Immature Obs
Adipoq	1.45901e-52	3.38246	0.769	0.017	0.752	3.01825e-48	Immature Obs
Cyp1b1	5.58292e-52	2.10381	0.846	0.027	0.819	1.15494e-47	Immature Obs
Marc1	5.5551e-44	1.16888	0.538	0.005	0.533	1.14918e-39	Immature Obs
Ggt5	1.21029e-41	1.67276	0.808	0.045	0.763	2.50372e-37	Immature Obs
Lamb1	6.07208e-41	1.47472	0.731	0.03	0.701	1.25613e-36	Immature Obs
Esm1	8.14161e-41	2.5028	0.731	0.03	0.701	1.68425e-36	Immature Obs
Lpl	5.96779e-40	4.24768	0.885	0.067	0.818	1.23456e-35	Immature Obs
1500009L16Rik	1.22023e-39	1.7661	0.808	0.05	0.758	2.52429e-35	Immature Obs
Kng2	8.78844e-39	1.63518	0.615	0.017	0.598	1.81806e-34	Immature Obs
Ms4a4d	9.64819e-39	0.931962	0.538	0.01	0.528	1.99592e-34	Immature Obs
Serping1	6.06544e-38	3.19905	0.885	0.072	0.813	1.25476e-33	Immature Obs
Gm4951	1.54356e-37	1.11384	0.5	0.007	0.493	3.19317e-33	Immature Obs
Vcam1	3.45619e-37	3.2347	0.962	0.099	0.863	7.14981e-33	Immature Obs
Thsd7a	6.26166e-37	0.994723	0.462	0.005	0.457	1.29535e-32	Immature Obs
Kitl	8.15057e-37	2.91089	0.885	0.074	0.811	1.68611e-32	Immature Obs
Ebf3	8.842e-37	2.56507	0.923	0.094	0.829	1.82914e-32	Immature Obs
Wdr86	2.64854e-36	0.9308	0.423	0.002	0.421	5.47904e-32	Immature Obs
Vegfc	4.5717e-35	1.1453	0.692	0.037	0.655	9.45747e-31	Immature Obs
Cxcl12	6.26984e-35	4.90526	1	0.134	0.866	1.29704e-30	Immature Obs
Sfrp4	1.20989e-34	1.85989	0.731	0.042	0.689	2.5029e-30	Immature Obs
Aldh1a2	2.0621e-34	1.61387	0.462	0.007	0.455	4.26586e-30	Immature Obs
Mylk	2.34352e-33	2.03439	0.962	0.116	0.846	4.84804e-29	Immature Obs
Fbln5	3.19998e-33	3.24602	0.962	0.126	0.836	6.61979e-29	Immature Obs
Fmo2	4.84569e-33	1.2301	0.385	0.002	0.383	1.00243e-28	Immature Obs
Angpt1	7.29336e-33	1.24046	0.731	0.05	0.681	1.50878e-28	Immature Obs
Serpina3g	1.27765e-32	1.36391	0.462	0.01	0.452	2.64307e-28	Immature Obs
Col4a1	1.74188e-32	2.31503	0.885	0.087	0.798	3.60343e-28	Immature Obs
C1s1	3.43421e-32	1.86946	0.654	0.037	0.617	7.10434e-28	Immature Obs
Mme	9.96452e-32	1.68144	0.923	0.104	0.819	2.06136e-27	Immature Obs
Negr1	3.14093e-31	0.919839	0.423	0.007	0.416	6.49765e-27	Immature Obs
Rbpms	4.00514e-31	1.67108	0.692	0.05	0.642	8.28544e-27	Immature Obs
Rarres2	5.39234e-31	2.8564	0.769	0.067	0.702	1.11551e-26	Immature Obs
Grem1	1.09004e-30	2.09436	0.692	0.05	0.642	2.25497e-26	Immature Obs
F830016B08Rik	2.88309e-30	0.855091	0.385	0.005	0.38	5.96424e-26	Immature Obs
Oasl2	5.06422e-30	0.707474	0.462	0.012	0.45	1.04763e-25	Immature Obs
Tnfsf11	4.33036e-29	1.23786	0.538	0.025	0.513	8.95823e-25	Immature Obs
Hmgcll1	7.36049e-29	0.710817	0.423	0.01	0.413	1.52266e-24	Immature Obs
Il34	1.01735e-28	0.962545	0.5	0.02	0.48	2.1046e-24	Immature Obs
Iigp1	3.96622e-28	1.17121	0.5	0.02	0.48	8.20491e-24	Immature Obs
Fgf7	1.3996e-27	1.18024	0.5	0.022	0.478	2.89536e-23	Immature Obs
Pdgfrb	2.4704e-27	2.01589	0.885	0.126	0.759	5.11052e-23	Immature Obs
Itga9	3.12497e-27	0.872117	0.538	0.027	0.511	6.46462e-23	Immature Obs
Cdh11	4.6358e-27	2.87876	1	0.186	0.814	9.59007e-23	Immature Obs
Col8a1	6.05108e-27	2.60784	0.769	0.079	0.69	1.25179e-22	Immature Obs
Arrdc4	2.12851e-26	1.93897	0.846	0.116	0.73	4.40324e-22	Immature Obs
Cygb	2.20463e-26	1.6404	0.577	0.037	0.54	4.56072e-22	Immature Obs
Hp	4.35214e-26	3.53965	0.962	0.183	0.779	9.00327e-22	Immature Obs
Igfbp4	4.44016e-26	4.15149	1	0.218	0.782	9.18537e-22	Immature Obs
Adgrf5	5.07791e-26	1.6517	0.692	0.069	0.623	1.05047e-21	Immature Obs
Ackr4	5.41666e-26	1.73741	0.692	0.069	0.623	1.12054e-21	Immature Obs
Loxl1	6.35167e-26	1.66659	0.808	0.099	0.709	1.31397e-21	Immature Obs
Nnmt	1.17876e-25	1.60262	0.769	0.094	0.675	2.4385e-21	Immature Obs
Fmo1	1.89572e-25	1.1476	0.538	0.032	0.506	3.92167e-21	Immature Obs
Fst	7.98702e-25	1.98846	0.654	0.062	0.592	1.65227e-20	Immature Obs
Serpina12	8.31032e-25	1.53683	0.5	0.027	0.473	1.71916e-20	Immature Obs
Olfml2a	9.84805e-25	1.04177	0.5	0.027	0.473	2.03727e-20	Immature Obs
Igf1	1.46506e-24	2.24169	0.923	0.161	0.762	3.03078e-20	Immature Obs
Egfr	1.66715e-24	1.15788	0.615	0.054	0.561	3.44883e-20	Immature Obs
Sfrp1	8.85801e-24	1.45964	0.538	0.037	0.501	1.83246e-19	Immature Obs
Notch3	1.39646e-23	1.19724	0.538	0.037	0.501	2.88885e-19	Immature Obs
Igfbp5	1.95836e-23	3.75709	0.923	0.173	0.75	4.05126e-19	Immature Obs
Csmd1	3.91504e-23	0.547746	0.308	0.005	0.303	8.09905e-19	Immature Obs
Ecm1	4.7114e-23	1.53186	0.769	0.101	0.668	9.74647e-19	Immature Obs
Prss23	5.47391e-23	1.31284	0.5	0.032	0.468	1.13239e-18	Immature Obs
Amy1	7.09858e-23	0.790928	0.423	0.02	0.403	1.46848e-18	Immature Obs
Spry1	1.32483e-22	1.6008	0.577	0.05	0.527	2.74067e-18	Immature Obs
Sema6d	1.38284e-22	1.35937	0.692	0.084	0.608	2.86069e-18	Immature Obs
Agt	3.65597e-22	2.54389	0.923	0.218	0.705	7.5631e-18	Immature Obs
S1pr3	2.68803e-21	1.52332	0.808	0.136	0.672	5.56072e-17	Immature Obs
Slfn5	2.70581e-21	1.20689	0.577	0.052	0.525	5.5975e-17	Immature Obs
Gas6	8.25499e-21	3.6088	1	0.361	0.639	1.70771e-16	Immature Obs
Ifitm3	8.41636e-21	3.01976	1	0.307	0.693	1.74109e-16	Immature Obs
Limch1	9.15303e-21	2.42407	0.731	0.101	0.63	1.89349e-16	Immature Obs
Fstl1	1.18082e-20	3.02178	1	0.327	0.673	2.44277e-16	Immature Obs
Csf1	1.63646e-20	1.9062	0.808	0.151	0.657	3.38535e-16	Immature Obs
Angptl4	5.58179e-20	1.90376	0.769	0.131	0.638	1.15471e-15	Immature Obs
Ifi211	1.21862e-19	0.687581	0.385	0.02	0.365	2.52096e-15	Immature Obs
Trf	1.46074e-19	3.622	0.692	0.106	0.586	3.02183e-15	Immature Obs
Mdk	1.57366e-19	1.90184	0.885	0.205	0.68	3.25544e-15	Immature Obs
Col4a2	2.29093e-19	1.85687	0.808	0.161	0.647	4.73924e-15	Immature Obs
Plpp3	3.40787e-19	2.39611	0.923	0.267	0.656	7.04986e-15	Immature Obs
Heph	3.54494e-19	0.921752	0.346	0.015	0.331	7.33341e-15	Immature Obs
Pdzrn4	5.58407e-19	1.29102	0.385	0.022	0.363	1.15518e-14	Immature Obs
Epas1	6.64794e-19	2.01047	0.923	0.27	0.653	1.37526e-14	Immature Obs
St5	1.21802e-18	1.10654	0.615	0.082	0.533	2.51972e-14	Immature Obs
Adamts2	1.24741e-18	1.64155	0.885	0.191	0.694	2.58052e-14	Immature Obs
Svep1	1.79757e-18	1.15268	0.577	0.072	0.505	3.71862e-14	Immature Obs
Mmp23	1.95316e-18	1.37087	0.808	0.168	0.64	4.04051e-14	Immature Obs
Cp	2.01442e-18	2.15032	0.846	0.193	0.653	4.16723e-14	Immature Obs
Pparg	2.3315e-18	0.654225	0.385	0.022	0.363	4.82317e-14	Immature Obs
Il1rn	3.28347e-18	2.2862	0.577	0.072	0.505	6.79252e-14	Immature Obs
Fbln1	4.40085e-18	1.4021	0.538	0.057	0.481	9.10404e-14	Immature Obs
Parp14	5.40467e-18	0.738563	0.538	0.057	0.481	1.11806e-13	Immature Obs
Plxna2	6.24135e-18	1.83899	0.731	0.139	0.592	1.29115e-13	Immature Obs
Ednra	7.0854e-18	0.901589	0.385	0.025	0.36	1.46576e-13	Immature Obs
Itga1	7.17276e-18	2.04443	0.846	0.233	0.613	1.48383e-13	Immature Obs
Steap4	1.17952e-17	1.03543	0.692	0.104	0.588	2.44007e-13	Immature Obs
Sult1a1	1.24445e-17	0.674326	0.308	0.012	0.296	2.5744e-13	Immature Obs
Pappa	1.3647e-17	1.95337	0.769	0.163	0.606	2.82316e-13	Immature Obs
C1ra	1.37024e-17	1.52656	0.615	0.087	0.528	2.83461e-13	Immature Obs
Cxcl14	2.01273e-17	3.36398	0.962	0.364	0.598	4.16374e-13	Immature Obs
Fam20a	2.71046e-17	0.828907	0.5	0.052	0.448	5.60712e-13	Immature Obs
Marcks	3.15814e-17	2.58174	0.962	0.416	0.546	6.53324e-13	Immature Obs
Maf	3.66176e-17	1.85399	0.846	0.213	0.633	7.57508e-13	Immature Obs
Ebf1	4.52553e-17	2.03462	0.962	0.317	0.645	9.36197e-13	Immature Obs
Slc26a7	6.79896e-17	1.16459	0.385	0.027	0.358	1.4065e-12	Immature Obs
Cdh2	1.38823e-16	1.70134	0.769	0.139	0.63	2.87182e-12	Immature Obs
H2-Q10	1.46766e-16	0.844685	0.5	0.054	0.446	3.03616e-12	Immature Obs
Ptx3	1.63054e-16	1.65557	0.5	0.057	0.443	3.37311e-12	Immature Obs
Ogn	1.98391e-16	2.33048	0.923	0.309	0.614	4.10411e-12	Immature Obs
Tmem176b	2.2633e-16	2.54148	1	0.646	0.354	4.68209e-12	Immature Obs
Pla2r1	2.408e-16	0.566556	0.308	0.015	0.293	4.98143e-12	Immature Obs
Cfh	2.4104e-16	2.17843	0.923	0.225	0.698	4.98638e-12	Immature Obs
Angpt4	3.73556e-16	0.929651	0.308	0.015	0.293	7.72775e-12	Immature Obs
Tmem176a	3.78133e-16	2.37113	1	0.661	0.339	7.82243e-12	Immature Obs
Gsta4	4.33896e-16	0.809453	0.269	0.01	0.259	8.97601e-12	Immature Obs
Clmp	4.46404e-16	1.64542	0.885	0.312	0.573	9.23477e-12	Immature Obs
Ptgfr	4.55725e-16	0.763216	0.269	0.01	0.259	9.42758e-12	Immature Obs
Gpm6b	5.21352e-16	1.19792	0.769	0.183	0.586	1.07852e-11	Immature Obs
Enpp4	6.90053e-16	1.02339	0.5	0.062	0.438	1.42751e-11	Immature Obs
Serpine2	7.09582e-16	2.49619	1	0.48	0.52	1.46791e-11	Immature Obs
Bicc1	1.14148e-15	1.86764	0.846	0.267	0.579	2.36138e-11	Immature Obs
Ar	1.44252e-15	1.58483	0.808	0.218	0.59	2.98413e-11	Immature Obs
Abca8a	1.56153e-15	0.542664	0.385	0.03	0.355	3.23034e-11	Immature Obs
Tle2	1.58475e-15	0.983133	0.577	0.087	0.49	3.27836e-11	Immature Obs
Tnc	2.26335e-15	2.76678	0.731	0.146	0.585	4.6822e-11	Immature Obs
Gstm2	2.44914e-15	0.660921	0.462	0.05	0.412	5.06654e-11	Immature Obs
Aldh3a1	2.61936e-15	0.739497	0.346	0.025	0.321	5.41868e-11	Immature Obs
Pdlim2	2.9056e-15	1.29636	0.654	0.129	0.525	6.01081e-11	Immature Obs
Slc38a6	4.01582e-15	1.0117	0.5	0.067	0.433	8.30753e-11	Immature Obs
Isg15	7.43286e-15	1.14046	0.5	0.067	0.433	1.53764e-10	Immature Obs
Plxdc2	1.02156e-14	1.75763	0.846	0.26	0.586	2.1133e-10	Immature Obs
Rtp4	1.26768e-14	0.702837	0.269	0.012	0.257	2.62245e-10	Immature Obs
Cd302	1.36353e-14	2.11583	0.923	0.505	0.418	2.82074e-10	Immature Obs
Cldn10	1.36665e-14	1.30739	0.538	0.082	0.456	2.8272e-10	Immature Obs
Id4	1.49616e-14	1.97696	0.769	0.223	0.546	3.0951e-10	Immature Obs
Podnl1	1.94648e-14	0.870527	0.5	0.067	0.433	4.02668e-10	Immature Obs
Ifi204	2.35325e-14	0.6273	0.346	0.027	0.319	4.86816e-10	Immature Obs
Ksr1	3.21066e-14	0.59876	0.346	0.027	0.319	6.6419e-10	Immature Obs
Gstt1	3.22455e-14	1.15074	0.308	0.02	0.288	6.67063e-10	Immature Obs
Tnfrsf19	5.43459e-14	1.47638	0.615	0.124	0.491	1.12425e-09	Immature Obs
Mfap2	6.23153e-14	1.09439	0.615	0.116	0.499	1.28912e-09	Immature Obs
Mmp13	6.27636e-14	2.39132	0.577	0.087	0.49	1.29839e-09	Immature Obs
Ifih1	6.40427e-14	0.935014	0.423	0.05	0.373	1.32485e-09	Immature Obs
Fam161a	6.53516e-14	0.594995	0.462	0.057	0.405	1.35193e-09	Immature Obs
Mgst1	8.15201e-14	1.50057	0.692	0.153	0.539	1.68641e-09	Immature Obs
Kcnk2	8.30308e-14	1.24492	0.5	0.069	0.431	1.71766e-09	Immature Obs
Ak3	8.55297e-14	1.60417	0.692	0.186	0.506	1.76935e-09	Immature Obs
Pi15	1.65408e-13	1.18727	0.269	0.015	0.254	3.42179e-09	Immature Obs
Ism1	1.76078e-13	1.31953	0.462	0.062	0.4	3.64252e-09	Immature Obs
Zeb2	1.80646e-13	1.63048	0.923	0.381	0.542	3.73703e-09	Immature Obs
Bmp4	1.81765e-13	1.08873	0.423	0.05	0.373	3.76017e-09	Immature Obs
Umad1	1.84437e-13	0.690977	0.462	0.064	0.398	3.81545e-09	Immature Obs
Fndc1	2.0264e-13	1.52311	0.423	0.05	0.373	4.19201e-09	Immature Obs
Olfml2b	2.42866e-13	1.94992	0.692	0.173	0.519	5.02417e-09	Immature Obs
Tmbim6	2.44374e-13	1.39727	1	0.738	0.262	5.05537e-09	Immature Obs
Sept4	2.95486e-13	1.01429	0.577	0.109	0.468	6.11272e-09	Immature Obs
Kctd12	3.25603e-13	1.90329	0.885	0.389	0.496	6.73575e-09	Immature Obs
Palld	3.33619e-13	1.55412	0.808	0.265	0.543	6.90158e-09	Immature Obs
Bmp5	3.86187e-13	1.23244	0.692	0.186	0.506	7.98905e-09	Immature Obs
Tmem86a	3.88147e-13	1.31572	0.423	0.052	0.371	8.02959e-09	Immature Obs
Zfp618	5.29834e-13	0.76638	0.462	0.064	0.398	1.09607e-08	Immature Obs
Rbms3	6.29204e-13	1.2775	0.692	0.176	0.516	1.30163e-08	Immature Obs
Abi3bp	6.63602e-13	1.08354	0.808	0.22	0.588	1.37279e-08	Immature Obs
Cd1d1	6.72888e-13	1.04812	0.577	0.109	0.468	1.392e-08	Immature Obs
Dact1	8.01105e-13	1.02519	0.654	0.153	0.501	1.65725e-08	Immature Obs
Ghr	8.27738e-13	1.69536	0.769	0.257	0.512	1.71234e-08	Immature Obs
H2-T23	9.12869e-13	1.30538	0.731	0.205	0.526	1.88845e-08	Immature Obs
Ltbp2	9.24697e-13	2.27199	0.615	0.139	0.476	1.91292e-08	Immature Obs
Ifi47	9.44771e-13	0.515573	0.346	0.032	0.314	1.95445e-08	Immature Obs
Selenop	9.65326e-13	2.40418	0.808	0.324	0.484	1.99697e-08	Immature Obs
H2-Q7	9.76129e-13	1.42913	0.769	0.235	0.534	2.01932e-08	Immature Obs
Mpdz	1.56585e-12	1.27078	0.654	0.168	0.486	3.23928e-08	Immature Obs
Col5a3	1.64406e-12	1.19583	0.577	0.111	0.466	3.40107e-08	Immature Obs
Lox	1.72502e-12	1.4692	0.846	0.218	0.628	3.56854e-08	Immature Obs
S1pr1	1.82419e-12	1.41059	0.538	0.104	0.434	3.77369e-08	Immature Obs
Itih5	2.20022e-12	1.48468	0.538	0.092	0.446	4.55159e-08	Immature Obs
Basp1	2.85936e-12	1.28083	0.654	0.158	0.496	5.91516e-08	Immature Obs
Plxnd1	3.30487e-12	0.829049	0.538	0.099	0.439	6.83678e-08	Immature Obs
Psmb8	3.42341e-12	1.19349	0.692	0.183	0.509	7.082e-08	Immature Obs
Rftn1	3.9984e-12	0.914753	0.423	0.059	0.364	8.2715e-08	Immature Obs
Lamc1	4.45869e-12	1.06851	0.654	0.171	0.483	9.22369e-08	Immature Obs
H2-Q6	4.52354e-12	1.1719	0.654	0.156	0.498	9.35785e-08	Immature Obs
Fbn1	4.72519e-12	2.19691	0.808	0.329	0.479	9.77499e-08	Immature Obs
Il7	5.47175e-12	0.718603	0.385	0.047	0.338	1.13194e-07	Immature Obs
B4gat1	5.89684e-12	0.915125	0.5	0.092	0.408	1.21988e-07	Immature Obs
Cald1	5.91358e-12	1.9148	0.923	0.629	0.294	1.22334e-07	Immature Obs
Fgd6	7.20146e-12	0.655549	0.5	0.089	0.411	1.48977e-07	Immature Obs
Dock4	7.35161e-12	0.833087	0.5	0.089	0.411	1.52083e-07	Immature Obs
Mmd	7.3531e-12	0.708788	0.346	0.037	0.309	1.52114e-07	Immature Obs
Nid1	7.53569e-12	1.4038	0.577	0.131	0.446	1.55891e-07	Immature Obs
Cebpa	8.38126e-12	1.07697	0.577	0.126	0.451	1.73383e-07	Immature Obs
Phldb2	1.098e-11	0.680881	0.423	0.059	0.364	2.27142e-07	Immature Obs
Lhfp	1.32129e-11	1.39953	0.769	0.282	0.487	2.73335e-07	Immature Obs
Myo1b	1.91217e-11	0.952708	0.654	0.153	0.501	3.9557e-07	Immature Obs
Slit3	2.01805e-11	1.12515	0.577	0.124	0.453	4.17473e-07	Immature Obs
Epdr1	2.1642e-11	1.2132	0.654	0.183	0.471	4.47708e-07	Immature Obs
Mark1	2.23711e-11	0.79804	0.423	0.064	0.359	4.62791e-07	Immature Obs
Lama4	2.74038e-11	1.17783	0.615	0.161	0.454	5.66902e-07	Immature Obs
Adamts9	2.83154e-11	1.02096	0.577	0.124	0.453	5.8576e-07	Immature Obs
Dlg5	3.6981e-11	0.841492	0.577	0.136	0.441	7.65026e-07	Immature Obs
Nkd2	6.4758e-11	0.520031	0.423	0.064	0.359	1.33965e-06	Immature Obs
Myl9	6.55086e-11	1.06098	0.5	0.099	0.401	1.35518e-06	Immature Obs
Dpysl3	7.17662e-11	1.40931	0.769	0.277	0.492	1.48463e-06	Immature Obs
Antxr1	9.61736e-11	1.83349	0.808	0.391	0.417	1.98954e-06	Immature Obs
Wisp2	9.70761e-11	1.25567	0.462	0.084	0.378	2.00821e-06	Immature Obs
Prrx1	1.06185e-10	0.902123	0.808	0.28	0.528	2.19665e-06	Immature Obs
Six1	1.22118e-10	1.48384	0.5	0.101	0.399	2.52626e-06	Immature Obs
C4b	1.62963e-10	1.75935	0.769	0.262	0.507	3.37122e-06	Immature Obs
Tns3	1.76302e-10	1.10459	0.846	0.431	0.415	3.64716e-06	Immature Obs
Tmem140	1.81024e-10	0.888234	0.5	0.099	0.401	3.74484e-06	Immature Obs
Adgrl2	2.39438e-10	0.68638	0.385	0.057	0.328	4.95325e-06	Immature Obs
Apoe	2.50676e-10	1.56354	1	0.604	0.396	5.18574e-06	Immature Obs
Nsg1	2.87093e-10	0.752389	0.423	0.074	0.349	5.93909e-06	Immature Obs
Lgals3bp	3.16843e-10	1.5193	0.692	0.265	0.427	6.55453e-06	Immature Obs
Pdgfra	4.35804e-10	0.709826	0.615	0.149	0.466	9.01548e-06	Immature Obs
Ctsl	4.36942e-10	1.62785	0.885	0.606	0.279	9.03901e-06	Immature Obs
H2-T22	4.5442e-10	1.1031	0.654	0.223	0.431	9.40059e-06	Immature Obs
Fmnl2	4.59055e-10	0.587107	0.423	0.072	0.351	9.49648e-06	Immature Obs
Zfhx4	4.64859e-10	1.7332	0.692	0.225	0.467	9.61654e-06	Immature Obs
Ptprd	5.56874e-10	1.63677	0.885	0.46	0.425	1.15201e-05	Immature Obs
Fzd1	5.80871e-10	1.30085	0.462	0.092	0.37	1.20165e-05	Immature Obs
Cnn2	6.42652e-10	1.24542	0.769	0.327	0.442	1.32945e-05	Immature Obs
Notch1	7.72374e-10	0.840419	0.538	0.129	0.409	1.59781e-05	Immature Obs
Tcn2	7.76626e-10	1.20072	0.615	0.186	0.429	1.60661e-05	Immature Obs
Fgfr2	1.20203e-09	1.24837	0.731	0.295	0.436	2.48665e-05	Immature Obs
Gja1	1.69658e-09	1.85911	0.885	0.582	0.303	3.50971e-05	Immature Obs
Map4k4	2.26442e-09	1.29461	0.923	0.646	0.277	4.6844e-05	Immature Obs
Pgf	2.27562e-09	0.682908	0.423	0.077	0.346	4.70758e-05	Immature Obs
Tgfbr3	2.302e-09	1.8394	0.846	0.51	0.336	4.76214e-05	Immature Obs
Rnase4	2.83875e-09	0.696403	0.577	0.151	0.426	5.87251e-05	Immature Obs
Akap12	3.31634e-09	1.02123	0.538	0.136	0.402	6.86051e-05	Immature Obs
Rai14	3.6875e-09	1.31779	0.654	0.233	0.421	7.62833e-05	Immature Obs
Fcgrt	3.77123e-09	1.18558	0.846	0.525	0.321	7.80155e-05	Immature Obs
Hvcn1	4.35633e-09	0.785372	0.462	0.097	0.365	9.01195e-05	Immature Obs
Rspo3	4.46189e-09	1.77463	0.731	0.329	0.402	9.23031e-05	Immature Obs
Islr	5.07243e-09	1.33841	0.923	0.658	0.265	0.000104933	Immature Obs
Bmp6	6.19474e-09	1.16737	0.538	0.146	0.392	0.000128151	Immature Obs
Klhl24	7.36847e-09	1.14584	0.846	0.493	0.353	0.000152432	Immature Obs
Marc2	8.653e-09	0.847627	0.808	0.386	0.422	0.000179005	Immature Obs
Dhrs3	9.08407e-09	1.08101	0.654	0.25	0.404	0.000187922	Immature Obs
Kirrel	1.10099e-08	1.05761	0.654	0.255	0.399	0.000227761	Immature Obs
Tln2	1.12065e-08	1.2903	0.731	0.349	0.382	0.000231828	Immature Obs
Foxc1	1.89489e-08	1.21632	0.885	0.559	0.326	0.000391997	Immature Obs
H2-Q4	2.02445e-08	0.903017	0.731	0.302	0.429	0.000418798	Immature Obs
Fzd5	2.34546e-08	1.14904	0.538	0.161	0.377	0.000485205	Immature Obs
Nrp1	3.20994e-08	1.53288	0.731	0.351	0.38	0.000664041	Immature Obs
Bst2	3.74054e-08	1.77714	0.615	0.225	0.39	0.000773805	Immature Obs
Igsf3	4.20207e-08	0.987596	0.731	0.347	0.384	0.000869282	Immature Obs
Hfe	4.23137e-08	0.541245	0.308	0.047	0.261	0.000875344	Immature Obs
Itgav	4.33068e-08	1.12943	0.808	0.505	0.303	0.000895889	Immature Obs
Olfml3	4.5627e-08	1.25537	0.885	0.567	0.318	0.000943886	Immature Obs
Fhl2	4.66042e-08	1.22506	0.654	0.265	0.389	0.000964102	Immature Obs
Cbr3	5.20299e-08	0.578282	0.385	0.079	0.306	0.00107634	Immature Obs
Psmb10	6.26643e-08	1.19989	0.615	0.255	0.36	0.00129634	Immature Obs
Gnai1	7.0899e-08	0.687842	0.462	0.104	0.358	0.00146669	Immature Obs
Ckb	7.68418e-08	0.829287	0.808	0.324	0.484	0.00158963	Immature Obs
Stat1	7.72854e-08	0.676083	0.538	0.168	0.37	0.0015988	Immature Obs
Thra	8.45333e-08	0.79573	0.846	0.488	0.358	0.00174874	Immature Obs
Rbms1	8.90098e-08	1.17812	0.808	0.515	0.293	0.00184135	Immature Obs
Rbp1	8.91472e-08	0.54771	0.346	0.064	0.282	0.00184419	Immature Obs
Apbb2	9.92658e-08	1.05481	0.731	0.403	0.328	0.00205351	Immature Obs
Ifngr2	1.00781e-07	0.947112	0.692	0.322	0.37	0.00208485	Immature Obs
Eif4e3	1.05297e-07	0.509937	0.423	0.097	0.326	0.00217828	Immature Obs
Samhd1	1.07765e-07	1.36358	0.769	0.431	0.338	0.00222934	Immature Obs
Synm	1.18394e-07	0.64457	0.423	0.099	0.324	0.00244921	Immature Obs
Lpp	1.34146e-07	1.19506	0.769	0.493	0.276	0.00277508	Immature Obs
Pbx1	1.34446e-07	1.01494	0.615	0.255	0.36	0.00278128	Immature Obs
Sdc1	1.43326e-07	1.00129	0.654	0.28	0.374	0.00296499	Immature Obs
Ssbp4	1.59698e-07	0.789016	0.577	0.205	0.372	0.00330367	Immature Obs
Shroom3	1.83736e-07	1.10596	0.385	0.089	0.296	0.00380095	Immature Obs
Acvr2a	1.88714e-07	0.660559	0.346	0.069	0.277	0.00390392	Immature Obs
Snai2	2.0557e-07	1.01522	0.731	0.351	0.38	0.00425263	Immature Obs
Rasgrp2	2.38019e-07	0.875846	0.538	0.173	0.365	0.00492391	Immature Obs
Mxra8	2.51023e-07	0.863507	0.769	0.426	0.343	0.00519292	Immature Obs
Foxj2	2.58613e-07	0.787336	0.385	0.089	0.296	0.00534992	Immature Obs
Esr1	2.80378e-07	0.815915	0.385	0.089	0.296	0.00580019	Immature Obs
Fat1	3.06279e-07	1.31876	0.769	0.48	0.289	0.00633599	Immature Obs
Man2a2	3.07563e-07	0.885397	0.615	0.267	0.348	0.00636256	Immature Obs
Rtn4rl1	3.08349e-07	0.650623	0.385	0.084	0.301	0.00637882	Immature Obs
Pon2	4.22535e-07	0.995995	0.654	0.312	0.342	0.00874098	Immature Obs
Igtp	4.9841e-07	0.703326	0.308	0.057	0.251	0.0103106	Immature Obs
Ifnar2	5.5406e-07	0.933196	0.692	0.386	0.306	0.0114618	Immature Obs
Vegfb	5.68727e-07	0.683367	0.423	0.116	0.307	0.0117652	Immature Obs
Pdk4	6.11715e-07	0.952657	0.385	0.089	0.296	0.0126545	Immature Obs
Postn	6.90326e-07	0.663098	0.308	0.052	0.256	0.0142808	Immature Obs
Sox4	9.90445e-07	0.99264	0.731	0.369	0.362	0.0204893	Immature Obs
Ssh2	1.19534e-06	0.84941	0.615	0.277	0.338	0.024728	Immature Obs
Slc6a6	1.19871e-06	1.41083	0.846	0.574	0.272	0.0247978	Immature Obs
Ctso	1.3259e-06	0.659692	0.346	0.079	0.267	0.0274289	Immature Obs
Phlda3	1.3675e-06	0.772428	0.462	0.141	0.321	0.0282896	Immature Obs
Clec2d	1.40845e-06	0.801602	0.346	0.077	0.269	0.0291367	Immature Obs
Ttyh3	1.46211e-06	0.849494	0.423	0.129	0.294	0.0302467	Immature Obs
Bmp2k	1.47841e-06	0.679855	0.654	0.304	0.35	0.0305838	Immature Obs
Slc20a2	1.59012e-06	0.913591	0.423	0.124	0.299	0.0328948	Immature Obs
Slc40a1	1.60577e-06	0.952173	0.423	0.119	0.304	0.0332185	Immature Obs
Abcc5	1.75507e-06	1.00439	0.577	0.245	0.332	0.0363071	Immature Obs
Adamts5	1.90989e-06	1.63324	0.654	0.295	0.359	0.0395099	Immature Obs
Esyt1	2.14491e-06	1.00553	0.615	0.28	0.335	0.0443718	Immature Obs
Cfh	7.29694e-31	2.23774	0.704	0.139	0.565	1.50952e-26	Mature Obs
Car3	7.25179e-30	3.36591	0.439	0.024	0.415	1.50018e-25	Mature Obs
Insc	1.07082e-28	0.685404	0.357	0.003	0.354	2.21521e-24	Mature Obs
Ifitm5	1.03463e-27	1.95719	0.388	0.015	0.373	2.14033e-23	Mature Obs
Pcdh7	1.51875e-27	0.909121	0.398	0.018	0.38	3.14183e-23	Mature Obs
Col1a1	7.56699e-26	5.86683	0.704	0.271	0.433	1.56538e-21	Mature Obs
Entpd3	2.62144e-24	0.713511	0.316	0.006	0.31	5.42297e-20	Mature Obs
Cdh2	5.45325e-24	1.45699	0.52	0.075	0.445	1.12811e-19	Mature Obs
Col22a1	1.36504e-23	1.78023	0.439	0.057	0.382	2.82385e-19	Mature Obs
Slc36a2	1.38745e-23	1.049	0.388	0.03	0.358	2.87023e-19	Mature Obs
Mlip	1.84982e-23	0.586621	0.306	0.006	0.3	3.82672e-19	Mature Obs
Lipc	1.38839e-22	0.583383	0.286	0.003	0.283	2.87216e-18	Mature Obs
Slit2	3.61345e-20	1.00288	0.439	0.063	0.376	7.47515e-16	Mature Obs
Nrp2	3.84652e-20	2.32402	0.612	0.229	0.383	7.95729e-16	Mature Obs
Kazald1	4.57835e-20	1.75843	0.49	0.114	0.376	9.47124e-16	Mature Obs
Satb2	4.52845e-19	1.41858	0.49	0.114	0.376	9.36801e-15	Mature Obs
Dmp1	1.29798e-18	1.23725	0.286	0.015	0.271	2.68512e-14	Mature Obs
Cdh11	4.34448e-18	1.16757	0.571	0.136	0.435	8.98743e-14	Mature Obs
Ppfibp2	4.53001e-18	0.715493	0.378	0.048	0.33	9.37123e-14	Mature Obs
Cpz	5.4651e-18	1.24146	0.306	0.027	0.279	1.13057e-13	Mature Obs
Fat3	1.84871e-17	1.01904	0.388	0.06	0.328	3.82443e-13	Mature Obs
Chn1	4.05559e-17	0.579412	0.296	0.024	0.272	8.3898e-13	Mature Obs
Tmem119	5.33509e-17	1.05542	0.378	0.063	0.315	1.10367e-12	Mature Obs
Bglap2	9.30401e-17	5.25692	0.582	0.244	0.338	1.92472e-12	Mature Obs
Lgals1	1.38619e-16	2.28862	0.643	0.331	0.312	2.86761e-12	Mature Obs
Bglap	2.14803e-16	5.77409	0.622	0.307	0.315	4.44363e-12	Mature Obs
Col13a1	3.9087e-16	1.08285	0.408	0.087	0.321	8.08592e-12	Mature Obs
Ano1	3.53099e-15	0.578536	0.327	0.048	0.279	7.30456e-11	Mature Obs
Tbx2	6.07028e-15	0.630675	0.286	0.03	0.256	1.25576e-10	Mature Obs
Lox	6.6132e-15	1.62034	0.52	0.178	0.342	1.36807e-10	Mature Obs
Slit3	3.46102e-14	0.669252	0.398	0.078	0.32	7.15982e-10	Mature Obs
Gnai1	1.25397e-13	0.748514	0.337	0.063	0.274	2.59408e-09	Mature Obs
Pdgfra	1.57738e-13	0.991395	0.429	0.102	0.327	3.26312e-09	Mature Obs
Adamts2	1.76798e-13	1.16543	0.5	0.154	0.346	3.65742e-09	Mature Obs
Dapk2	4.3792e-12	0.724539	0.388	0.105	0.283	9.05925e-08	Mature Obs
Cadm1	1.29613e-11	1.37935	0.48	0.217	0.263	2.6813e-07	Mature Obs
Pard6g	1.44842e-11	0.690565	0.367	0.099	0.268	2.99636e-07	Mature Obs
Myo1b	4.42435e-11	0.609307	0.408	0.117	0.291	9.15265e-07	Mature Obs
Zeb2	2.90872e-09	1.38462	0.633	0.349	0.284	6.01727e-05	Mature Obs
Dpysl3	3.37843e-08	1.1057	0.51	0.247	0.263	0.000698896	Mature Obs
Ifitm3	5.66065e-07	0.568422	0.561	0.286	0.275	0.0117102	Mature Obs

## Sheet: Figure 1J (P6 and P56 combined)
gene	p_val	avg_log2FC	% in this cluster	% in all other cells	% difference	p_val_adj	this cluster
Cxcl12	1.8956e-126	4.03	0.989	0.511	0.478	4.3994e-122	progenitors
Lpl	1.8468e-118	3.58	0.86	0.206	0.654	4.2861e-114	progenitors
Vcam1	5.7788e-118	2.51	0.867	0.207	0.66	1.3412e-113	progenitors
Kitl	4.5022e-106	2.24	0.867	0.286	0.581	1.0449e-101	progenitors
Igfbp4	5.5738e-104	2.82	0.989	0.722	0.267	1.2936e-99	progenitors
Agt	2.5044e-100	2.12	0.852	0.273	0.579	5.8125e-96	progenitors
Gas6	1.01834e-98	2.34	0.908	0.348	0.56	2.36345e-94	progenitors
Ebf3	1.66148e-94	1.54	0.771	0.176	0.595	3.85612e-90	progenitors
Adipoq	2.6971e-93	2.35	0.417	0.003	0.414	6.2597e-89	progenitors
Hp	5.42079e-93	2.82	0.863	0.328	0.535	1.25811e-88	progenitors
Fbn1	6.50154e-90	1.83	0.937	0.441	0.496	1.50894e-85	progenitors
Igf1	1.2905e-88	2	0.897	0.281	0.616	2.99513e-84	progenitors
Fbln5	9.16842e-88	1.86	0.775	0.206	0.569	2.1279e-83	progenitors
Gdpd2	9.88988e-87	1.66	0.764	0.198	0.566	2.29534e-82	progenitors
Kng1	3.17123e-85	1.29	0.513	0.043	0.47	7.36012e-81	progenitors
Kng2	1.23774e-83	1.26	0.424	0.015	0.409	2.87267e-79	progenitors
Cxcl14	6.05273e-83	2.75	0.48	0.034	0.446	1.40478e-78	progenitors
Mgst1	6.25897e-82	1.39	0.664	0.132	0.532	1.45264e-77	progenitors
Col4a1	4.53682e-81	1.75	0.878	0.3	0.578	1.05295e-76	progenitors
Col4a2	1.37398e-78	1.45	0.834	0.259	0.575	3.18887e-74	progenitors
Lepr	1.80932e-78	1.84	0.819	0.288	0.531	4.19925e-74	progenitors
Lamb1	6.72029e-77	1.27	0.782	0.246	0.536	1.55971e-72	progenitors
Esm1	1.11986e-76	1.82	0.399	0.017	0.382	2.59908e-72	progenitors
Gpm6b	2.00141e-73	1.29	0.708	0.194	0.514	4.64506e-69	progenitors
Serping1	1.09137e-71	1.79	0.694	0.199	0.495	2.53296e-67	progenitors
Plpp3	1.02892e-70	1.7	0.771	0.295	0.476	2.38803e-66	progenitors
Bmp6	2.07046e-70	1.06	0.539	0.084	0.455	4.80532e-66	progenitors
Selenop	4.23329e-70	1.52	0.838	0.427	0.411	9.82505e-66	progenitors
Aldh1a2	7.22408e-70	1.18	0.469	0.05	0.419	1.67664e-65	progenitors
Ggt5	7.63789e-69	1.19	0.768	0.256	0.512	1.77268e-64	progenitors
Plxdc2	1.46032e-68	1.38	0.878	0.444	0.434	3.38925e-64	progenitors
Pdgfrb	5.74461e-68	1.28	0.937	0.451	0.486	1.33327e-63	progenitors
Grem1	2.43778e-67	1.22	0.45	0.047	0.403	5.65784e-63	progenitors
1500009L16Rik	1.0598e-66	1.1	0.627	0.149	0.478	2.45969e-62	progenitors
Igfbp7	2.75266e-66	2.14	0.797	0.34	0.457	6.38864e-62	progenitors
Id4	8.2853e-64	1.4	0.797	0.346	0.451	1.92294e-59	progenitors
Itga1	1.33985e-63	1.24	0.83	0.327	0.503	3.10965e-59	progenitors
Rspo3	1.66599e-62	1.39	0.749	0.264	0.485	3.86661e-58	progenitors
Dpep1	2.05691e-62	1.17	0.524	0.099	0.425	4.77389e-58	progenitors
Col8a1	1.05968e-60	1.42	0.528	0.094	0.434	2.45941e-56	progenitors
Arrdc4	1.33321e-59	1.17	0.76	0.318	0.442	3.09425e-55	progenitors
Fst	1.91087e-59	1.07	0.487	0.078	0.409	4.43493e-55	progenitors
Epas1	3.78205e-57	1.26	0.827	0.406	0.421	8.77775e-53	progenitors
Serpina3g	5.40202e-57	1.37	0.627	0.185	0.442	1.25375e-52	progenitors
Tgfbr3	8.88383e-57	1.35	0.649	0.223	0.426	2.06185e-52	progenitors
Apoe	2.5595e-56	2.83	0.679	0.276	0.403	5.94034e-52	progenitors
Rbms3	3.3354e-56	1.11	0.771	0.333	0.438	7.74113e-52	progenitors
Steap4	9.41202e-56	1.01	0.657	0.182	0.475	2.18444e-51	progenitors
Fmo1	1.5792e-55	0.95	0.524	0.111	0.413	3.66516e-51	progenitors
Nid1	1.29426e-54	1.17	0.657	0.223	0.434	3.00385e-50	progenitors
Plac8	3.48813e-54	1.63	0.653	0.215	0.438	8.0956e-50	progenitors
Igfbp5	2.0713e-53	2.05	0.915	0.602	0.313	4.80727e-49	progenitors
Lbp	4.61945e-52	1.35	0.601	0.196	0.405	1.07213e-47	progenitors
Fhl2	9.50269e-52	1.23	0.83	0.459	0.371	2.20548e-47	progenitors
Rbpms	1.27765e-48	0.89	0.517	0.127	0.39	2.9653e-44	progenitors
Pappa	1.58929e-48	1.08	0.801	0.357	0.444	3.68859e-44	progenitors
Islr	8.94726e-48	1.18	0.923	0.631	0.292	2.07657e-43	progenitors
Samhd1	5.09158e-47	1.06	0.749	0.376	0.373	1.1817e-42	progenitors
Mdk	1.15545e-46	1.1	0.911	0.642	0.269	2.68167e-42	progenitors
Vegfc	1.41759e-46	0.99	0.52	0.141	0.379	3.29009e-42	progenitors
Negr1	5.54337e-46	0.54	0.299	0.025	0.274	1.28656e-41	progenitors
Tmem86a	5.9825e-46	1.28	0.635	0.245	0.39	1.38848e-41	progenitors
Cyp1b1	2.50494e-45	0.89	0.557	0.161	0.396	5.81372e-41	progenitors
Mylk	3.14299e-45	1.09	0.753	0.369	0.384	7.29458e-41	progenitors
Pparg	3.17615e-45	0.55	0.325	0.037	0.288	7.37154e-41	progenitors
Myl9	2.33275e-44	1.33	0.779	0.39	0.389	5.41408e-40	progenitors
Ism1	7.54681e-44	0.76	0.38	0.065	0.315	1.75154e-39	progenitors
Loxl1	1.09079e-43	0.98	0.804	0.401	0.403	2.53161e-39	progenitors
Adgrf5	2.01953e-43	0.78	0.494	0.133	0.361	4.68712e-39	progenitors
Ptx3	5.89547e-43	1.43	0.664	0.285	0.379	1.36828e-38	progenitors
Clu	6.22499e-43	1.26	0.672	0.302	0.37	1.44476e-38	progenitors
Gpc6	1.42899e-41	1.06	0.742	0.401	0.341	3.31655e-37	progenitors
Abi3bp	1.71004e-41	1.04	0.461	0.117	0.344	3.96882e-37	progenitors
Epb41l4b	4.28882e-41	0.63	0.292	0.033	0.259	9.95392e-37	progenitors
Akap12	3.6955e-40	0.81	0.399	0.084	0.315	8.57688e-36	progenitors
Cebpa	6.74659e-40	0.79	0.498	0.155	0.343	1.56582e-35	progenitors
Tnfsf11	5.54206e-39	1	0.738	0.384	0.354	1.28626e-34	progenitors
Ogn	1.63976e-38	1.06	0.764	0.386	0.378	3.80573e-34	progenitors
Olfml2a	2.71003e-38	0.94	0.661	0.254	0.407	6.2897e-34	progenitors
Sned1	3.32095e-38	0.92	0.649	0.283	0.366	7.7076e-34	progenitors
Col18a1	5.7659e-38	1.17	0.362	0.069	0.293	1.33821e-33	progenitors
Ccl2	6.04677e-37	1.4	0.535	0.18	0.355	1.4034e-32	progenitors
Nrp1	1.08638e-36	1.13	0.653	0.335	0.318	2.52139e-32	progenitors
Tns3	6.88187e-36	0.78	0.823	0.553	0.27	1.59721e-31	progenitors
Itga9	1.22177e-35	0.74	0.653	0.277	0.376	2.83561e-31	progenitors
Tln2	1.38543e-34	0.87	0.756	0.447	0.309	3.21544e-30	progenitors
Cygb	7.38377e-34	0.77	0.303	0.052	0.251	1.7137e-29	progenitors
Rarres2	8.59914e-34	1.22	0.314	0.056	0.258	1.99578e-29	progenitors
Tnfrsf21	2.58229e-33	0.68	0.461	0.143	0.318	5.99323e-29	progenitors
Sfrp1	9.29877e-33	1.11	0.391	0.111	0.28	2.15815e-28	progenitors
Fgf7	4.99923e-32	0.62	0.384	0.098	0.286	1.16027e-27	progenitors
Notch3	8.656e-32	0.78	0.675	0.328	0.347	2.00897e-27	progenitors
Plxnd1	1.41027e-31	0.78	0.69	0.361	0.329	3.27309e-27	progenitors
Svep1	9.95406e-31	0.58	0.421	0.126	0.295	2.31024e-26	progenitors
Lama4	3.47732e-30	0.71	0.683	0.36	0.323	8.07051e-26	progenitors
Slc6a6	5.07281e-30	1.46	0.557	0.283	0.274	1.17735e-25	progenitors
Psmb8	5.86749e-30	0.68	0.487	0.181	0.306	1.36179e-25	progenitors
Fam69a	1.18432e-29	0.65	0.465	0.168	0.297	2.7487e-25	progenitors
Plekhh2	1.2929e-29	0.45	0.339	0.081	0.258	3.00068e-25	progenitors
Apbb2	1.30582e-29	0.68	0.753	0.451	0.302	3.03067e-25	progenitors
Wdr86	2.65332e-29	0.49	0.358	0.091	0.267	6.1581e-25	progenitors
Heph	8.437e-29	0.55	0.428	0.136	0.292	1.95814e-24	progenitors
Trf	2.17218e-28	2.02	0.387	0.123	0.264	5.04141e-24	progenitors
Pxdn	2.32706e-28	0.58	0.384	0.109	0.275	5.40088e-24	progenitors
Tmed5	5.99852e-28	0.82	0.712	0.46	0.252	1.3922e-23	progenitors
Tapbp	1.11717e-27	0.7	0.686	0.427	0.259	2.59284e-23	progenitors
Tgfbi	2.95701e-27	0.86	0.723	0.45	0.273	6.86293e-23	progenitors
Fblim1	6.27717e-27	0.47	0.369	0.107	0.262	1.45687e-22	progenitors
Lgals3bp	2.5236e-24	0.62	0.458	0.188	0.27	5.85701e-20	progenitors
Man1a	8.14829e-24	0.64	0.454	0.196	0.258	1.89114e-19	progenitors
Fgfrl1	8.22835e-24	0.56	0.421	0.169	0.252	1.90972e-19	progenitors
Ifitm1	9.97008e-24	0.65	0.417	0.161	0.256	2.31396e-19	progenitors
Tle2	1.39267e-23	0.57	0.635	0.362	0.273	3.23226e-19	progenitors
Mpdz	3.14857e-23	0.58	0.506	0.245	0.261	7.30751e-19	progenitors
Wisp2	9.82532e-23	0.68	0.446	0.169	0.277	2.28036e-18	progenitors
Rras	1.20369e-22	0.6	0.483	0.226	0.257	2.79363e-18	progenitors
Bmp5	1.00971e-21	0.57	0.613	0.343	0.27	2.34344e-17	progenitors
Ccdc3	1.33266e-20	0.62	0.642	0.353	0.289	3.09298e-16	progenitors
Podnl1	4.33136e-19	0.52	0.701	0.42	0.281	1.00527e-14	progenitors
Col5a3	4.77066e-19	0.73	0.465	0.209	0.256	1.10722e-14	progenitors
S100b	7.81665e-18	0.44	0.454	0.203	0.251	1.81417e-13	progenitors
S100a6	6.67086e-53	1.1	0.946	0.694	0.252	1.54824e-48	immature Obs
Postn	3.97118e-50	1.4	0.808	0.478	0.33	9.21671e-46	immature Obs
Mest	4.30915e-31	1.03	0.824	0.57	0.254	1.00011e-26	immature Obs
Slc20a2	2.83167e-29	0.76	0.721	0.408	0.313	6.57203e-25	immature Obs
Plxna2	1.15067e-23	0.57	0.706	0.428	0.278	2.67058e-19	immature Obs
Limch1	1.16823e-23	0.84	0.726	0.473	0.253	2.71135e-19	immature Obs
Podnl1	1.40958e-21	0.53	0.665	0.396	0.269	3.27149e-17	immature Obs
Pclaf	1.1968e-144	1.86	0.834	0.076	0.758	2.7776e-140	proliferating Obs
Racgap1	8.7811e-142	1.19	0.744	0.04	0.704	2.038e-137	proliferating Obs
Birc5	1.0168e-135	2	0.869	0.117	0.752	2.36e-131	proliferating Obs
Pbk	4.481e-124	0.99	0.603	0.02	0.583	1.04e-119	proliferating Obs
Cdca8	3.1805e-123	1.06	0.688	0.046	0.642	7.3815e-119	proliferating Obs
Tpx2	2.851e-117	0.97	0.633	0.035	0.598	6.6168e-113	proliferating Obs
Tk1	4.8707e-116	0.99	0.668	0.046	0.622	1.1304e-111	proliferating Obs
Cdk1	1.7859e-113	1.41	0.764	0.093	0.671	4.1448e-109	proliferating Obs
Cdca3	2.902e-109	1.31	0.759	0.096	0.663	6.7353e-105	proliferating Obs
Cenpe	7.5581e-109	0.95	0.588	0.031	0.557	1.7542e-104	proliferating Obs
Tyms	5.1599e-107	1.39	0.849	0.159	0.69	1.1976e-102	proliferating Obs
Top2a	8.5255e-107	1.81	0.829	0.157	0.672	1.9787e-102	proliferating Obs
Mki67	1.9008e-106	1.46	0.799	0.126	0.673	4.4116e-102	proliferating Obs
Shcbp1	1.1964e-103	0.64	0.523	0.019	0.504	2.7767e-99	proliferating Obs
Smc2	4.7567e-103	1.47	0.849	0.175	0.674	1.10399e-98	proliferating Obs
Ska1	5.2098e-102	0.58	0.503	0.016	0.487	1.20913e-97	proliferating Obs
Hmmr	7.2915e-101	0.78	0.497	0.016	0.481	1.69228e-96	proliferating Obs
Kif15	7.1283e-100	0.66	0.538	0.026	0.512	1.65441e-95	proliferating Obs
Tmpo	9.6742e-100	1.4	0.905	0.235	0.67	2.24528e-95	proliferating Obs
Spc24	2.68237e-96	1.12	0.804	0.145	0.659	6.22551e-92	proliferating Obs
Ccna2	3.08039e-96	0.66	0.538	0.029	0.509	7.14928e-92	proliferating Obs
Rrm2	1.54229e-95	1.25	0.799	0.147	0.652	3.57949e-91	proliferating Obs
Cenph	1.8237e-95	0.64	0.573	0.038	0.535	4.23263e-91	proliferating Obs
Cenpm	2.37221e-95	0.81	0.698	0.083	0.615	5.50565e-91	proliferating Obs
Pimreg	1.45887e-94	0.55	0.452	0.011	0.441	3.38588e-90	proliferating Obs
Tacc3	1.70694e-93	0.81	0.618	0.06	0.558	3.96163e-89	proliferating Obs
Ccnb1	1.82267e-93	0.79	0.568	0.039	0.529	4.23023e-89	proliferating Obs
Spc25	3.70155e-93	0.6	0.503	0.024	0.479	8.59092e-89	proliferating Obs
Melk	9.72409e-90	0.49	0.442	0.013	0.429	2.25686e-85	proliferating Obs
Stmn1	2.31617e-89	1.98	0.955	0.399	0.556	5.37559e-85	proliferating Obs
Ckap2l	3.74227e-88	0.55	0.457	0.018	0.439	8.68544e-84	proliferating Obs
Cenpf	1.5113e-85	1.07	0.543	0.045	0.498	3.50758e-81	proliferating Obs
Ube2c	2.08804e-85	1.57	0.693	0.115	0.578	4.84613e-81	proliferating Obs
Knl1	9.36705e-85	0.56	0.492	0.029	0.463	2.174e-80	proliferating Obs
Gmnn	1.25227e-84	0.8	0.633	0.077	0.556	2.90639e-80	proliferating Obs
Ncapd2	1.64919e-84	0.56	0.518	0.036	0.482	3.8276e-80	proliferating Obs
Aurkb	1.90127e-84	0.52	0.452	0.021	0.431	4.41267e-80	proliferating Obs
Clspn	2.60885e-84	0.73	0.548	0.047	0.501	6.05487e-80	proliferating Obs
Anln	5.19187e-83	0.56	0.462	0.024	0.438	1.20498e-78	proliferating Obs
Bub1	9.16419e-83	0.5	0.452	0.022	0.43	2.12692e-78	proliferating Obs
Kif11	4.94748e-82	0.68	0.513	0.039	0.474	1.14826e-77	proliferating Obs
Rrm1	1.51731e-80	1.08	0.809	0.189	0.62	3.52152e-76	proliferating Obs
Hist1h2ap	1.15133e-78	1	0.457	0.028	0.429	2.67213e-74	proliferating Obs
Cenpq	2.46224e-77	0.65	0.608	0.076	0.532	5.71462e-73	proliferating Obs
Cdc20	3.8324e-77	1.04	0.558	0.063	0.495	8.89461e-73	proliferating Obs
Cenpw	4.53979e-77	0.99	0.794	0.201	0.593	1.05364e-72	proliferating Obs
Kif4	1.7436e-76	0.5	0.422	0.021	0.401	4.04673e-72	proliferating Obs
Ndc80	4.79683e-76	0.43	0.387	0.013	0.374	1.1133e-71	proliferating Obs
Ccnb2	6.11618e-76	1.04	0.638	0.098	0.54	1.4195e-71	proliferating Obs
Nusap1	6.75455e-75	0.65	0.497	0.044	0.453	1.56766e-70	proliferating Obs
Prc1	9.46293e-75	0.86	0.583	0.079	0.504	2.19625e-70	proliferating Obs
Kif22	3.94815e-74	0.49	0.452	0.031	0.421	9.16325e-70	proliferating Obs
Esco2	5.1529e-74	0.45	0.382	0.014	0.368	1.19594e-69	proliferating Obs
Cks1b	7.80556e-74	1.27	0.905	0.375	0.53	1.81159e-69	proliferating Obs
Lmnb1	8.98729e-74	0.87	0.784	0.18	0.604	2.08586e-69	proliferating Obs
Depdc1a	1.62647e-73	0.44	0.392	0.016	0.376	3.77487e-69	proliferating Obs
Foxm1	2.58222e-71	0.58	0.503	0.049	0.454	5.99307e-67	proliferating Obs
Ncapg	5.32903e-70	0.43	0.392	0.02	0.372	1.23681e-65	proliferating Obs
Mxd3	5.91884e-70	0.5	0.407	0.024	0.383	1.3737e-65	proliferating Obs
Mcm5	1.91035e-69	0.77	0.633	0.102	0.531	4.43373e-65	proliferating Obs
Rad51ap1	6.48671e-69	0.42	0.377	0.018	0.359	1.5055e-64	proliferating Obs
Hist1h1b	4.99045e-68	0.63	0.432	0.032	0.4	1.15823e-63	proliferating Obs
Lockd	9.8763e-68	0.67	0.543	0.068	0.475	2.29219e-63	proliferating Obs
Incenp	1.41181e-67	0.73	0.593	0.095	0.498	3.27668e-63	proliferating Obs
Bub1b	3.39802e-66	0.45	0.382	0.021	0.361	7.88647e-62	proliferating Obs
Rad51	1.26961e-65	0.41	0.362	0.017	0.345	2.94664e-61	proliferating Obs
Mad2l1	1.31008e-65	0.58	0.533	0.072	0.461	3.04057e-61	proliferating Obs
Cenpp	1.74826e-65	0.4	0.407	0.028	0.379	4.05753e-61	proliferating Obs
Nuf2	2.50826e-65	0.42	0.342	0.013	0.329	5.82141e-61	proliferating Obs
Ckap2	2.86635e-65	0.58	0.508	0.059	0.449	6.65252e-61	proliferating Obs
Spag5	6.54092e-65	0.44	0.442	0.038	0.404	1.51808e-60	proliferating Obs
Dnajc9	2.90114e-64	0.82	0.734	0.187	0.547	6.73325e-60	proliferating Obs
Cenpa	3.17839e-64	1.62	0.648	0.139	0.509	7.37673e-60	proliferating Obs
C330027C09Rik	4.5659e-64	0.48	0.452	0.043	0.409	1.0597e-59	proliferating Obs
Selenoh	6.49862e-64	1.2	0.98	0.627	0.353	1.50826e-59	proliferating Obs
Hist1h2ae	1.27007e-63	0.88	0.462	0.051	0.411	2.9477e-59	proliferating Obs
Smc4	2.03784e-63	1.2	0.859	0.368	0.491	4.72962e-59	proliferating Obs
Knstrn	5.0985e-63	0.63	0.477	0.053	0.424	1.18331e-58	proliferating Obs
Pkmyt1	8.5523e-63	0.45	0.452	0.045	0.407	1.9849e-58	proliferating Obs
Cit	1.40191e-62	0.41	0.372	0.023	0.349	3.25369e-58	proliferating Obs
Plk1	1.92016e-62	0.37	0.327	0.012	0.315	4.45649e-58	proliferating Obs
Nucks1	2.89224e-61	1.17	0.985	0.71	0.275	6.7126e-57	proliferating Obs
Dhfr	7.09549e-60	0.66	0.538	0.085	0.453	1.64679e-55	proliferating Obs
Mis18bp1	2.20217e-59	0.38	0.342	0.019	0.323	5.11101e-55	proliferating Obs
Uhrf1	4.2895e-59	0.61	0.533	0.083	0.45	9.95551e-55	proliferating Obs
Prim1	6.1462e-59	0.53	0.513	0.072	0.441	1.42647e-54	proliferating Obs
Diaph3	3.36471e-58	0.43	0.372	0.027	0.345	7.80915e-54	proliferating Obs
Arhgap11a	4.5719e-58	0.46	0.407	0.038	0.369	1.06109e-53	proliferating Obs
H2afx	5.05375e-58	1.16	0.759	0.264	0.495	1.17292e-53	proliferating Obs
Iqgap3	5.50457e-58	0.4	0.337	0.019	0.318	1.27756e-53	proliferating Obs
Cdkn3	4.62118e-57	0.62	0.422	0.044	0.378	1.07253e-52	proliferating Obs
Lig1	1.05672e-56	0.9	0.678	0.176	0.502	2.45255e-52	proliferating Obs
Dek	9.55361e-56	1.08	0.96	0.656	0.304	2.2173e-51	proliferating Obs
Sgo2a	1.84369e-54	0.29	0.312	0.016	0.296	4.27902e-50	proliferating Obs
Kif20b	4.03678e-53	0.38	0.337	0.025	0.312	9.36895e-49	proliferating Obs
Cenpn	1.1783e-52	0.35	0.357	0.029	0.328	2.73472e-48	proliferating Obs
Cenpk	2.92702e-52	0.45	0.437	0.056	0.381	6.79331e-48	proliferating Obs
Rad21	2.03514e-51	0.96	0.869	0.424	0.445	4.72335e-47	proliferating Obs
Kif23	3.58359e-51	0.6	0.508	0.087	0.421	8.31716e-47	proliferating Obs
Cdkn2c	4.13409e-51	0.58	0.568	0.116	0.452	9.59481e-47	proliferating Obs
Trip13	1.01652e-49	0.37	0.387	0.044	0.343	2.35925e-45	proliferating Obs
Asf1b	1.02584e-49	0.36	0.327	0.025	0.302	2.38087e-45	proliferating Obs
Neil3	1.86113e-49	0.33	0.317	0.023	0.294	4.31949e-45	proliferating Obs
Ccdc34	4.11621e-49	0.95	0.894	0.451	0.443	9.55331e-45	proliferating Obs
Chaf1b	5.59863e-49	0.56	0.467	0.077	0.39	1.29939e-44	proliferating Obs
Kif20a	6.05622e-49	0.3	0.302	0.019	0.283	1.40559e-44	proliferating Obs
Cks2	1.08943e-48	1.14	0.98	0.636	0.344	2.52847e-44	proliferating Obs
Cdca5	2.16408e-48	0.26	0.271	0.013	0.258	5.02262e-44	proliferating Obs
Gins2	2.2764e-48	0.57	0.543	0.114	0.429	5.2833e-44	proliferating Obs
Kifc1	5.30151e-48	0.29	0.271	0.014	0.257	1.23043e-43	proliferating Obs
Topbp1	6.78002e-48	0.71	0.683	0.2	0.483	1.57357e-43	proliferating Obs
Hmgn2	1.12887e-47	1.12	0.935	0.563	0.372	2.62001e-43	proliferating Obs
Mybl2	2.67417e-47	0.34	0.291	0.019	0.272	6.20649e-43	proliferating Obs
Plk4	3.43876e-47	0.49	0.523	0.103	0.42	7.98102e-43	proliferating Obs
Cdc45	6.38013e-47	0.32	0.352	0.036	0.316	1.48076e-42	proliferating Obs
Ect2	2.94478e-46	0.29	0.322	0.029	0.293	6.83454e-42	proliferating Obs
Tipin	3.31524e-46	0.89	0.789	0.329	0.46	7.69433e-42	proliferating Obs
Tedc1	5.3252e-46	0.29	0.317	0.027	0.29	1.23593e-41	proliferating Obs
Mcm7	1.49822e-45	0.7	0.648	0.19	0.458	3.47723e-41	proliferating Obs
Rangap1	2.22958e-45	0.72	0.653	0.204	0.449	5.17463e-41	proliferating Obs
Ncapg2	6.59776e-45	0.6	0.513	0.106	0.407	1.53127e-40	proliferating Obs
Rfc5	8.35609e-45	0.41	0.518	0.105	0.413	1.93937e-40	proliferating Obs
Usp1	8.48969e-45	0.74	0.668	0.223	0.445	1.97037e-40	proliferating Obs
Cenpi	1.45273e-44	0.27	0.286	0.021	0.265	3.37164e-40	proliferating Obs
Pola1	1.69318e-44	0.4	0.412	0.061	0.351	3.92969e-40	proliferating Obs
Rpa2	2.81199e-44	0.54	0.538	0.122	0.416	6.52635e-40	proliferating Obs
Lsm2	3.0408e-44	0.75	0.784	0.328	0.456	7.0574e-40	proliferating Obs
Hirip3	8.44869e-44	0.51	0.472	0.088	0.384	1.96086e-39	proliferating Obs
Pmf1	4.20291e-43	0.55	0.618	0.171	0.447	9.75453e-39	proliferating Obs
Dbf4	5.9737e-43	0.51	0.568	0.141	0.427	1.38644e-38	proliferating Obs
Fbxo5	6.86264e-43	0.35	0.281	0.022	0.259	1.59275e-38	proliferating Obs
Pcna	3.31372e-42	0.87	0.814	0.372	0.442	7.69081e-38	proliferating Obs
Aspm	5.75098e-42	0.51	0.402	0.063	0.339	1.33474e-37	proliferating Obs
Siva1	6.09548e-42	0.92	0.859	0.46	0.399	1.4147e-37	proliferating Obs
Syce2	2.27437e-41	0.5	0.508	0.111	0.397	5.27859e-37	proliferating Obs
Atad2	1.01208e-40	0.59	0.613	0.174	0.439	2.34895e-36	proliferating Obs
Hist1h3c	1.24175e-40	0.32	0.286	0.025	0.261	2.88197e-36	proliferating Obs
E2f1	2.20632e-40	0.48	0.427	0.077	0.35	5.12064e-36	proliferating Obs
Cenps	2.63937e-40	0.3	0.332	0.039	0.293	6.1257e-36	proliferating Obs
Mcm3	4.30098e-40	0.55	0.518	0.12	0.398	9.98215e-36	proliferating Obs
Tubb6	7.28593e-39	0.88	0.899	0.538	0.361	1.69099e-34	proliferating Obs
Ssrp1	1.22515e-38	0.73	0.879	0.504	0.375	2.84345e-34	proliferating Obs
Dut	1.40009e-38	1.03	0.859	0.457	0.402	3.24947e-34	proliferating Obs
Dtymk	2.39866e-38	0.83	0.889	0.55	0.339	5.56705e-34	proliferating Obs
Mcm6	1.40932e-37	0.64	0.538	0.147	0.391	3.2709e-33	proliferating Obs
Dctpp1	1.4761e-37	0.69	0.729	0.296	0.433	3.42588e-33	proliferating Obs
Ncaph	4.47046e-37	0.26	0.317	0.039	0.278	1.03755e-32	proliferating Obs
Sae1	1.03811e-36	0.7	0.844	0.431	0.413	2.40934e-32	proliferating Obs
Zfp367	1.44096e-36	0.32	0.402	0.075	0.327	3.34431e-32	proliferating Obs
Dnmt1	1.72725e-36	0.5	0.523	0.135	0.388	4.00878e-32	proliferating Obs
Ndc1	2.47534e-36	0.37	0.447	0.094	0.353	5.74501e-32	proliferating Obs
Fam111a	4.49308e-36	0.29	0.307	0.039	0.268	1.0428e-31	proliferating Obs
Vrk1	8.45242e-35	0.33	0.457	0.101	0.356	1.96172e-30	proliferating Obs
Nasp	1.12292e-34	0.83	0.925	0.592	0.333	2.60618e-30	proliferating Obs
Haus4	2.43966e-34	0.39	0.482	0.118	0.364	5.66221e-30	proliferating Obs
Fen1	3.23692e-34	0.37	0.447	0.101	0.346	7.51256e-30	proliferating Obs
Lsm5	3.88664e-34	0.68	0.91	0.578	0.332	9.0205e-30	proliferating Obs
Dtl	5.49932e-34	0.49	0.492	0.125	0.367	1.27634e-29	proliferating Obs
Ezh2	1.17943e-33	0.47	0.608	0.199	0.409	2.73733e-29	proliferating Obs
Exosc8	1.20836e-33	0.54	0.628	0.227	0.401	2.80449e-29	proliferating Obs
Rfc2	1.84965e-33	0.57	0.698	0.288	0.41	4.29286e-29	proliferating Obs
Orc6	9.39185e-33	0.65	0.643	0.253	0.39	2.17976e-28	proliferating Obs
H1fx	1.77614e-32	0.79	0.769	0.364	0.405	4.12223e-28	proliferating Obs
Slc43a3	1.81135e-32	0.41	0.457	0.111	0.346	4.20396e-28	proliferating Obs
Tcf19	1.97306e-32	0.28	0.322	0.05	0.272	4.57927e-28	proliferating Obs
Anp32e	3.07966e-32	0.7	0.859	0.518	0.341	7.14758e-28	proliferating Obs
Kpnb1	1.63534e-31	0.66	0.874	0.527	0.347	3.79546e-27	proliferating Obs
Hmgb3	3.70692e-31	0.55	0.739	0.326	0.413	8.60338e-27	proliferating Obs
Lsm3	4.79811e-31	0.64	0.804	0.425	0.379	1.11359e-26	proliferating Obs
Hat1	1.39405e-30	0.5	0.568	0.19	0.378	3.23546e-26	proliferating Obs
Mcm2	4.28394e-30	0.45	0.457	0.124	0.333	9.9426e-26	proliferating Obs
Rpa1	9.10581e-30	0.39	0.467	0.125	0.342	2.11337e-25	proliferating Obs
Rfc4	1.37298e-29	0.42	0.477	0.135	0.342	3.18655e-25	proliferating Obs
Cmc2	1.4191e-29	0.43	0.588	0.212	0.376	3.29358e-25	proliferating Obs
Hells	1.43193e-29	0.42	0.387	0.087	0.3	3.32337e-25	proliferating Obs
Rbl1	8.20395e-29	0.32	0.327	0.062	0.265	1.90405e-24	proliferating Obs
Cnih4	9.47864e-29	0.56	0.844	0.507	0.337	2.1999e-24	proliferating Obs
Rad18	1.7306e-28	0.29	0.362	0.077	0.285	4.01655e-24	proliferating Obs
Rnaseh2c	1.46483e-27	0.63	0.905	0.611	0.294	3.39972e-23	proliferating Obs
Alyref	2.35827e-27	0.62	0.874	0.564	0.31	5.47332e-23	proliferating Obs
Nsmce4a	2.62724e-27	0.55	0.759	0.369	0.39	6.09757e-23	proliferating Obs
Atad5	4.0534e-27	0.3	0.317	0.063	0.254	9.40755e-23	proliferating Obs
Aaas	7.31027e-27	0.3	0.367	0.088	0.279	1.69664e-22	proliferating Obs
Nsd2	1.15433e-26	0.49	0.623	0.241	0.382	2.67907e-22	proliferating Obs
Prim2	2.71746e-26	0.27	0.337	0.073	0.264	6.30695e-22	proliferating Obs
Jpt2	4.64883e-26	0.38	0.533	0.185	0.348	1.07895e-21	proliferating Obs
Rcc1	5.11782e-26	0.34	0.513	0.17	0.343	1.1878e-21	proliferating Obs
Mrpl18	5.31631e-26	0.59	0.784	0.491	0.293	1.23386e-21	proliferating Obs
Nde1	5.85501e-26	0.41	0.472	0.155	0.317	1.35889e-21	proliferating Obs
Psip1	4.29338e-25	0.59	0.874	0.585	0.289	9.96451e-21	proliferating Obs
Baz1b	6.5246e-25	0.48	0.729	0.348	0.381	1.51429e-20	proliferating Obs
Psmc3ip	6.59895e-25	0.28	0.327	0.074	0.253	1.53155e-20	proliferating Obs
Bok	9.71385e-25	0.62	0.683	0.322	0.361	2.25449e-20	proliferating Obs
Cntln	1.05453e-24	0.33	0.457	0.137	0.32	2.44747e-20	proliferating Obs
Bub3	4.39865e-24	0.6	0.698	0.37	0.328	1.02088e-19	proliferating Obs
Brip1os	5.33984e-24	0.37	0.503	0.171	0.332	1.23932e-19	proliferating Obs
Rpa3	6.50737e-24	0.52	0.709	0.33	0.379	1.5103e-19	proliferating Obs
Mlf1	1.04006e-23	0.41	0.573	0.225	0.348	2.41388e-19	proliferating Obs
Pold2	1.30354e-23	0.3	0.402	0.117	0.285	3.02538e-19	proliferating Obs
Nup85	1.36413e-23	0.29	0.432	0.132	0.3	3.16601e-19	proliferating Obs
Nup93	2.13885e-23	0.31	0.467	0.149	0.318	4.96406e-19	proliferating Obs
Haus1	2.89127e-23	0.3	0.417	0.123	0.294	6.71034e-19	proliferating Obs
Ppih	4.06916e-23	0.42	0.573	0.239	0.334	9.4441e-19	proliferating Obs
Cbx5	5.75121e-23	0.46	0.638	0.289	0.349	1.3348e-18	proliferating Obs
Hjurp	6.75247e-23	0.53	0.608	0.265	0.343	1.56718e-18	proliferating Obs
Nrm	7.27919e-23	0.33	0.447	0.149	0.298	1.68943e-18	proliferating Obs
Phgdh	8.14759e-23	0.57	0.844	0.533	0.311	1.89098e-18	proliferating Obs
Tubg1	1.04189e-22	0.34	0.437	0.144	0.293	2.41812e-18	proliferating Obs
Nudc	1.31248e-22	0.51	0.884	0.583	0.301	3.04613e-18	proliferating Obs
Med30	1.39476e-22	0.44	0.673	0.325	0.348	3.23709e-18	proliferating Obs
Lbr	2.24959e-22	0.47	0.658	0.293	0.365	5.22108e-18	proliferating Obs
Arl6ip1	6.31877e-22	0.78	0.653	0.326	0.327	1.46652e-17	proliferating Obs
Ppil1	7.48219e-22	0.32	0.487	0.18	0.307	1.73654e-17	proliferating Obs
Hpf1	1.39644e-21	0.54	0.734	0.408	0.326	3.24099e-17	proliferating Obs
Ncapd3	2.35588e-21	0.27	0.367	0.104	0.263	5.46775e-17	proliferating Obs
Cep192	2.64811e-21	0.25	0.422	0.128	0.294	6.146e-17	proliferating Obs
Cdk2	3.7331e-21	0.3	0.417	0.133	0.284	8.66415e-17	proliferating Obs
Rfc3	3.96096e-21	0.39	0.548	0.223	0.325	9.193e-17	proliferating Obs
Lsm6	5.53169e-21	0.47	0.844	0.532	0.312	1.28385e-16	proliferating Obs
Tfdp1	7.42407e-21	0.44	0.628	0.295	0.333	1.72305e-16	proliferating Obs
Ncaph2	8.7494e-21	0.46	0.709	0.378	0.331	2.03065e-16	proliferating Obs
Hspa14	9.23807e-21	0.39	0.623	0.287	0.336	2.14406e-16	proliferating Obs
Rbbp7	1.03568e-20	0.55	0.925	0.647	0.278	2.40371e-16	proliferating Obs
Impdh2	1.13887e-20	0.48	0.899	0.642	0.257	2.64321e-16	proliferating Obs
Rdm1	1.52822e-20	0.39	0.442	0.157	0.285	3.54686e-16	proliferating Obs
Ckap5	2.26194e-20	0.42	0.623	0.285	0.338	5.24973e-16	proliferating Obs
Snrpd3	2.53395e-20	0.48	0.92	0.645	0.275	5.88104e-16	proliferating Obs
Smchd1	3.66632e-20	0.41	0.764	0.437	0.327	8.50916e-16	proliferating Obs
Gins4	3.97614e-20	0.31	0.392	0.127	0.265	9.22823e-16	proliferating Obs
Dcps	4.09274e-20	0.25	0.513	0.187	0.326	9.49883e-16	proliferating Obs
Smc6	4.98634e-20	0.5	0.869	0.586	0.283	1.15728e-15	proliferating Obs
Lin54	5.02239e-20	0.3	0.437	0.147	0.29	1.16565e-15	proliferating Obs
Rnf26	5.65142e-20	0.35	0.528	0.219	0.309	1.31164e-15	proliferating Obs
Smc1a	7.70141e-20	0.5	0.859	0.585	0.274	1.78742e-15	proliferating Obs
Anapc15	8.76104e-20	0.33	0.528	0.212	0.316	2.03335e-15	proliferating Obs
Dpy30	1.05844e-19	0.41	0.683	0.352	0.331	2.45654e-15	proliferating Obs
Cdt1	1.06723e-19	0.35	0.442	0.16	0.282	2.47692e-15	proliferating Obs
Lyar	1.85394e-19	0.42	0.734	0.411	0.323	4.30282e-15	proliferating Obs
Fkbp3	2.3366e-19	0.49	0.915	0.643	0.272	5.42301e-15	proliferating Obs
Rpp30	2.3944e-19	0.29	0.402	0.134	0.268	5.55717e-15	proliferating Obs
Rnaseh2b	3.97899e-19	0.29	0.508	0.197	0.311	9.23484e-15	proliferating Obs
Nsmce1	7.10754e-19	0.37	0.653	0.328	0.325	1.64959e-14	proliferating Obs
Xpo1	8.6804e-19	0.36	0.643	0.316	0.327	2.01463e-14	proliferating Obs
Mrpl51	8.97986e-19	0.48	0.749	0.466	0.283	2.08413e-14	proliferating Obs
Tsen34	1.6867e-18	0.46	0.859	0.59	0.269	3.91465e-14	proliferating Obs
Cklf	2.08669e-18	0.25	0.407	0.139	0.268	4.843e-14	proliferating Obs
Ddx39	6.73214e-18	0.39	0.663	0.351	0.312	1.56246e-13	proliferating Obs
Rfc1	6.91035e-18	0.42	0.653	0.348	0.305	1.60382e-13	proliferating Obs
Mcm4	9.53836e-18	0.31	0.402	0.137	0.265	2.21376e-13	proliferating Obs
Lsm8	1.22507e-17	0.41	0.698	0.41	0.288	2.84326e-13	proliferating Obs
Csrp2	1.97445e-17	0.54	0.819	0.54	0.279	4.58251e-13	proliferating Obs
Anapc11	2.04589e-17	0.37	0.744	0.434	0.31	4.74831e-13	proliferating Obs
Gjc1	3.59627e-17	0.37	0.548	0.231	0.317	8.34658e-13	proliferating Obs
Lsm4	5.27096e-17	0.46	0.92	0.654	0.266	1.22334e-12	proliferating Obs
Srsf1	6.91408e-17	0.38	0.829	0.525	0.304	1.60469e-12	proliferating Obs
Vars	7.244e-17	0.35	0.638	0.322	0.316	1.68126e-12	proliferating Obs
Paics	1.2606e-16	0.44	0.603	0.322	0.281	2.92573e-12	proliferating Obs
Erh	1.2897e-16	0.45	0.829	0.541	0.288	2.99327e-12	proliferating Obs
Timm50	1.87367e-16	0.4	0.618	0.325	0.293	4.3486e-12	proliferating Obs
Pa2g4	2.28372e-16	0.39	0.809	0.521	0.288	5.30029e-12	proliferating Obs
Ndufaf2	4.03416e-16	0.39	0.668	0.39	0.278	9.36287e-12	proliferating Obs
Sms	4.61157e-16	0.28	0.528	0.237	0.291	1.0703e-11	proliferating Obs
Tcof1	4.77508e-16	0.3	0.523	0.232	0.291	1.10825e-11	proliferating Obs
Hprt	5.48545e-16	0.32	0.714	0.386	0.328	1.27312e-11	proliferating Obs
Pin1	5.8346e-16	0.37	0.764	0.458	0.306	1.35415e-11	proliferating Obs
Fam92a	1.1041e-15	0.34	0.809	0.484	0.325	2.56251e-11	proliferating Obs
Ilf2	1.40618e-15	0.35	0.789	0.482	0.307	3.26359e-11	proliferating Obs
Cenpx	1.56264e-15	0.41	0.744	0.447	0.297	3.62674e-11	proliferating Obs
Uba2	2.30602e-15	0.35	0.784	0.466	0.318	5.35203e-11	proliferating Obs
Fabp5	2.80826e-15	0.52	0.698	0.405	0.293	6.51769e-11	proliferating Obs
Ywhah	3.37661e-15	0.4	0.678	0.365	0.313	7.83678e-11	proliferating Obs
Suz12	3.48095e-15	0.32	0.638	0.333	0.305	8.07893e-11	proliferating Obs
Ybx3	3.52866e-15	0.4	0.864	0.589	0.275	8.18967e-11	proliferating Obs
Anapc1	4.49395e-15	0.36	0.638	0.349	0.289	1.043e-10	proliferating Obs
Rgs10	6.38032e-15	0.32	0.528	0.229	0.299	1.48081e-10	proliferating Obs
Casp8ap2	9.66015e-15	0.25	0.472	0.203	0.269	2.24202e-10	proliferating Obs
Dnajc2	1.12039e-14	0.35	0.633	0.344	0.289	2.60032e-10	proliferating Obs
Stip1	1.16913e-14	0.34	0.633	0.348	0.285	2.71344e-10	proliferating Obs
Oxct1	1.87001e-14	0.4	0.834	0.552	0.282	4.3401e-10	proliferating Obs
Dynlt1f	3.73767e-14	0.28	0.492	0.221	0.271	8.67476e-10	proliferating Obs
Pttg1	4.5724e-14	0.38	0.538	0.277	0.261	1.06121e-09	proliferating Obs
Nudt5	4.87133e-14	0.3	0.603	0.33	0.273	1.13059e-09	proliferating Obs
Bex3	5.14933e-14	0.43	0.839	0.543	0.296	1.19511e-09	proliferating Obs
Eif1ad	5.70524e-14	0.33	0.608	0.333	0.275	1.32413e-09	proliferating Obs
Mrpl42	7.71154e-14	0.32	0.804	0.525	0.279	1.78977e-09	proliferating Obs
Sf3a3	7.89644e-14	0.28	0.623	0.333	0.29	1.83268e-09	proliferating Obs
Arl6ip6	8.19338e-14	0.3	0.487	0.23	0.257	1.9016e-09	proliferating Obs
Lmf2	8.89848e-14	0.34	0.598	0.326	0.272	2.06525e-09	proliferating Obs
Supt16	9.31895e-14	0.37	0.709	0.417	0.292	2.16284e-09	proliferating Obs
Naa50	1.18904e-13	0.41	0.759	0.497	0.262	2.75964e-09	proliferating Obs
Cbfb	1.45291e-13	0.35	0.809	0.554	0.255	3.37205e-09	proliferating Obs
Mrpl28	1.63171e-13	0.31	0.784	0.507	0.277	3.78704e-09	proliferating Obs
Snrpa1	2.06153e-13	0.36	0.759	0.489	0.27	4.78461e-09	proliferating Obs
Ipo5	3.25039e-13	0.37	0.774	0.515	0.259	7.54383e-09	proliferating Obs
2610524H06Rik	3.27951e-13	0.32	0.633	0.351	0.282	7.61141e-09	proliferating Obs
Snrnp40	3.90081e-13	0.27	0.598	0.314	0.284	9.05339e-09	proliferating Obs
Larp7	3.95664e-13	0.31	0.623	0.352	0.271	9.18296e-09	proliferating Obs
Cavin3	4.52697e-13	0.39	0.839	0.567	0.272	1.05066e-08	proliferating Obs
Nsg1	4.97595e-13	0.34	0.688	0.379	0.309	1.15487e-08	proliferating Obs
Idh3a	1.15805e-12	0.36	0.513	0.257	0.256	2.68772e-08	proliferating Obs
Trim28	1.38581e-12	0.32	0.824	0.549	0.275	3.21632e-08	proliferating Obs
Nop10	1.89895e-12	0.33	0.874	0.622	0.252	4.40728e-08	proliferating Obs
Usp14	2.0998e-12	0.28	0.603	0.337	0.266	4.87342e-08	proliferating Obs
Maz	2.19079e-12	0.32	0.774	0.518	0.256	5.08461e-08	proliferating Obs
Cacybp	2.91699e-12	0.38	0.814	0.556	0.258	6.77005e-08	proliferating Obs
Igsf8	3.86455e-12	0.3	0.613	0.325	0.288	8.96924e-08	proliferating Obs
U2af2	4.38965e-12	0.32	0.719	0.465	0.254	1.01879e-07	proliferating Obs
Uchl3	4.61586e-12	0.27	0.658	0.368	0.29	1.07129e-07	proliferating Obs
Psma1	5.24038e-12	0.3	0.849	0.572	0.277	1.21624e-07	proliferating Obs
Cs	5.48701e-12	0.27	0.678	0.402	0.276	1.27348e-07	proliferating Obs
Hdac2	6.69578e-12	0.31	0.784	0.514	0.27	1.55402e-07	proliferating Obs
Tmem97	7.60014e-12	0.33	0.648	0.385	0.263	1.76392e-07	proliferating Obs
Smarca4	1.14585e-11	0.26	0.834	0.551	0.283	2.65941e-07	proliferating Obs
Immt	1.34178e-11	0.32	0.749	0.468	0.281	3.11413e-07	proliferating Obs
Arl6ip4	1.42674e-11	0.3	0.709	0.444	0.265	3.31133e-07	proliferating Obs
Tmem109	2.49561e-11	0.32	0.734	0.464	0.27	5.79206e-07	proliferating Obs
Snrpc	3.08037e-11	0.29	0.854	0.6	0.254	7.14923e-07	proliferating Obs
Ak2	3.57739e-11	0.35	0.678	0.425	0.253	8.30277e-07	proliferating Obs
Ssna1	4.25124e-11	0.27	0.668	0.396	0.272	9.86669e-07	proliferating Obs
Elof1	5.99406e-11	0.34	0.759	0.487	0.272	1.39116e-06	proliferating Obs
Sptssa	6.02779e-11	0.3	0.834	0.557	0.277	1.39899e-06	proliferating Obs
Rcc2	8.13115e-11	0.27	0.683	0.426	0.257	1.88716e-06	proliferating Obs
Cnot6	9.45278e-11	0.29	0.799	0.538	0.261	2.1939e-06	proliferating Obs
Mrpl13	1.31918e-10	0.26	0.784	0.529	0.255	3.06168e-06	proliferating Obs
Sdc1	3.10312e-10	0.33	0.784	0.484	0.3	7.20203e-06	proliferating Obs
Thrap3	3.18561e-10	0.29	0.874	0.61	0.264	7.39348e-06	proliferating Obs
Nap1l4	4.63223e-10	0.26	0.764	0.51	0.254	1.07509e-05	proliferating Obs
Srrt	5.64806e-10	0.26	0.628	0.375	0.253	1.31086e-05	proliferating Obs
Ctsc	2.51779e-09	0.28	0.869	0.616	0.253	5.84353e-05	proliferating Obs
Col22a1	3.4216e-174	2.27	0.964	0.171	0.793	7.9411e-170	mature Obs
Cgref1	6.9225e-165	2.13	0.944	0.173	0.771	1.6066e-160	mature Obs
Ifitm5	1.366e-164	2.39	0.944	0.161	0.783	3.1704e-160	mature Obs
Cpz	6.1076e-161	1.78	0.894	0.125	0.769	1.4175e-156	mature Obs
Pcsk6	3.6403e-150	1.72	0.905	0.17	0.735	8.4489e-146	mature Obs
Col11a2	1.9379e-138	2.88	0.989	0.61	0.379	4.4976e-134	mature Obs
Smpd3	6.9828e-132	1.97	0.858	0.173	0.685	1.6206e-127	mature Obs
Slc13a5	7.7874e-128	1.35	0.693	0.05	0.643	1.8074e-123	mature Obs
Car3	1.9445e-124	2.23	0.902	0.265	0.637	4.513e-120	mature Obs
Kcnk1	5.9754e-117	0.92	0.729	0.089	0.64	1.3868e-112	mature Obs
Cthrc1	4.614e-115	2.17	0.941	0.479	0.462	1.0709e-110	mature Obs
Fkbp11	1.3282e-114	1.87	0.95	0.523	0.427	3.0826e-110	mature Obs
Insc	5.6989e-113	0.89	0.765	0.116	0.649	1.3227e-108	mature Obs
Lox	6.2205e-113	1.71	0.98	0.534	0.446	1.4437e-108	mature Obs
Nupr1	8.4214e-109	2.21	0.961	0.531	0.43	1.9545e-104	mature Obs
Col24a1	6.9189e-107	0.94	0.654	0.074	0.58	1.6058e-102	mature Obs
Pdgfrl	1.2101e-100	1.14	0.832	0.23	0.602	2.80842e-96	mature Obs
Cadm1	1.17237e-95	1.1	0.908	0.287	0.621	2.72096e-91	mature Obs
Fkbp7	9.74238e-95	1.28	0.941	0.647	0.294	2.26111e-90	mature Obs
Ramp1	7.18961e-94	1.49	0.849	0.294	0.555	1.66864e-89	mature Obs
Sema3b	3.66412e-93	0.63	0.617	0.071	0.546	8.50406e-89	mature Obs
Sgms2	2.32894e-92	1.49	0.936	0.547	0.389	5.40524e-88	mature Obs
Lipc	2.63704e-92	0.71	0.531	0.038	0.493	6.1203e-88	mature Obs
Zfp469	3.66632e-92	0.65	0.662	0.098	0.564	8.50915e-88	mature Obs
Mamdc2	9.05895e-92	0.66	0.528	0.036	0.492	2.10249e-87	mature Obs
Entpd3	8.25783e-90	0.74	0.601	0.075	0.526	1.91656e-85	mature Obs
Col13a1	5.80887e-88	0.97	0.913	0.292	0.621	1.34818e-83	mature Obs
Fabp3	2.94378e-87	0.74	0.687	0.12	0.567	6.83222e-83	mature Obs
Prex1	5.09156e-86	0.67	0.668	0.115	0.553	1.1817e-81	mature Obs
Bmp3	3.33509e-84	0.73	0.645	0.099	0.546	7.74041e-80	mature Obs
P4ha2	4.22133e-84	1.08	0.872	0.34	0.532	9.79727e-80	mature Obs
Creb3l1	3.94568e-83	1.33	0.897	0.422	0.475	9.15753e-79	mature Obs
Tmem119	4.04531e-83	1.32	0.802	0.269	0.533	9.38877e-79	mature Obs
Wisp1	3.84851e-82	1.2	0.927	0.462	0.465	8.93201e-78	mature Obs
Slc36a2	3.8907e-82	0.92	0.885	0.308	0.577	9.02992e-78	mature Obs
Chst13	4.28772e-80	0.53	0.575	0.073	0.502	9.95138e-76	mature Obs
Aldh1l2	1.17051e-78	0.52	0.514	0.052	0.462	2.71664e-74	mature Obs
Rerg	1.6142e-77	0.5	0.489	0.043	0.446	3.74639e-73	mature Obs
Vkorc1	6.21278e-77	1.07	0.944	0.654	0.29	1.44192e-72	mature Obs
Phex	8.09933e-77	1.71	0.709	0.173	0.536	1.87977e-72	mature Obs
Dcn	7.88842e-76	1.52	0.983	0.707	0.276	1.83082e-71	mature Obs
Kazald1	1.85571e-75	1.14	0.961	0.632	0.329	4.30691e-71	mature Obs
Nrp2	4.56125e-74	1.2	0.961	0.659	0.302	1.05862e-69	mature Obs
Mef2c	9.04362e-74	1.12	0.958	0.649	0.309	2.09893e-69	mature Obs
Plod2	3.41633e-73	1.05	0.975	0.713	0.262	7.92895e-69	mature Obs
Ano1	6.34499e-73	0.55	0.601	0.1	0.501	1.47261e-68	mature Obs
Sema3d	9.51347e-71	0.59	0.573	0.095	0.478	2.20798e-66	mature Obs
Mlip	5.7022e-70	0.58	0.601	0.111	0.49	1.32342e-65	mature Obs
Gprc5c	3.32885e-69	0.65	0.749	0.215	0.534	7.72593e-65	mature Obs
Jam2	6.20803e-69	0.59	0.547	0.089	0.458	1.44082e-64	mature Obs
Pycr1	9.68818e-65	0.49	0.55	0.099	0.451	2.24853e-60	mature Obs
Tmem238	2.90953e-64	0.46	0.553	0.101	0.452	6.75273e-60	mature Obs
Smim14	4.91028e-64	0.86	0.933	0.593	0.34	1.13963e-59	mature Obs
Drd4	8.31386e-64	0.32	0.338	0.01	0.328	1.92956e-59	mature Obs
Cdo1	1.31676e-63	0.98	0.743	0.267	0.476	3.05608e-59	mature Obs
P3h4	1.34705e-61	0.91	0.922	0.567	0.355	3.12637e-57	mature Obs
Gal	1.78954e-61	0.5	0.402	0.037	0.365	4.15335e-57	mature Obs
Dmp1	1.94617e-60	2.19	0.573	0.131	0.442	4.51686e-56	mature Obs
C430049E01Rik	5.02331e-60	0.46	0.335	0.015	0.32	1.16586e-55	mature Obs
Frmd4b	7.26028e-60	0.49	0.542	0.101	0.441	1.68504e-55	mature Obs
Gars	2.30078e-59	0.84	0.849	0.423	0.426	5.33989e-55	mature Obs
Gale	2.93754e-59	0.47	0.458	0.065	0.393	6.81773e-55	mature Obs
P4ha1	3.87115e-59	0.88	0.877	0.458	0.419	8.98455e-55	mature Obs
Cyfip2	1.64262e-58	0.63	0.628	0.159	0.469	3.81235e-54	mature Obs
Cryab	3.55572e-58	0.79	0.587	0.141	0.446	8.25246e-54	mature Obs
Robo2	5.99475e-58	0.63	0.651	0.182	0.469	1.39132e-53	mature Obs
Kdelr3	6.45635e-58	0.79	0.933	0.656	0.277	1.49845e-53	mature Obs
Ube2ql1	8.67634e-58	0.51	0.441	0.062	0.379	2.01369e-53	mature Obs
Slc8a3	9.23525e-58	0.47	0.584	0.13	0.454	2.14341e-53	mature Obs
Rom1	5.61889e-57	0.61	0.564	0.129	0.435	1.30409e-52	mature Obs
Snhg18	5.69292e-57	0.77	0.913	0.63	0.283	1.32127e-52	mature Obs
Grrp1	1.02612e-56	0.43	0.377	0.036	0.341	2.38151e-52	mature Obs
Spns2	1.54763e-56	0.64	0.623	0.166	0.457	3.59189e-52	mature Obs
Shc2	3.20671e-56	0.47	0.522	0.102	0.42	7.44245e-52	mature Obs
Kcnma1	1.44631e-55	0.58	0.615	0.156	0.459	3.35674e-51	mature Obs
Ptgis	2.9356e-55	1.04	0.933	0.555	0.378	6.81324e-51	mature Obs
Enpp6	9.22704e-55	0.62	0.712	0.235	0.477	2.1415e-50	mature Obs
Sec24d	5.99654e-54	0.71	0.86	0.42	0.44	1.39174e-49	mature Obs
Smox	1.0061e-53	0.56	0.598	0.163	0.435	2.33505e-49	mature Obs
Tgfb1	1.34919e-52	0.76	0.913	0.53	0.383	3.13133e-48	mature Obs
Pacsin1	1.56882e-52	0.36	0.318	0.021	0.297	3.64107e-48	mature Obs
Bcan	6.43356e-52	0.41	0.304	0.017	0.287	1.49316e-47	mature Obs
P3h1	1.71746e-51	0.75	0.941	0.639	0.302	3.98605e-47	mature Obs
Carmil1	4.85943e-51	0.59	0.62	0.195	0.425	1.12783e-46	mature Obs
Creb3l3	6.14662e-51	0.34	0.33	0.027	0.303	1.42657e-46	mature Obs
Hid1	6.78185e-51	0.29	0.302	0.017	0.285	1.574e-46	mature Obs
Bhlhe40	8.20053e-51	0.85	0.827	0.423	0.404	1.90326e-46	mature Obs
Atf3	1.32074e-50	1.18	0.883	0.567	0.316	3.06531e-46	mature Obs
Srm	2.40025e-50	0.86	0.844	0.463	0.381	5.57074e-46	mature Obs
Guca1a	8.95185e-50	0.44	0.503	0.108	0.395	2.07763e-45	mature Obs
Hrc	9.11958e-50	0.29	0.293	0.016	0.277	2.11656e-45	mature Obs
Cdr2l	2.34827e-49	0.66	0.785	0.351	0.434	5.4501e-45	mature Obs
Mmp16	1.34546e-48	0.59	0.76	0.293	0.467	3.12268e-44	mature Obs
Cd24a	2.10118e-48	0.66	0.642	0.207	0.435	4.87663e-44	mature Obs
Eprs	6.23766e-48	0.69	0.95	0.697	0.253	1.4477e-43	mature Obs
Prrc1	1.15382e-47	0.6	0.849	0.437	0.412	2.67791e-43	mature Obs
Arl4d	4.7861e-47	0.59	0.55	0.152	0.398	1.1108e-42	mature Obs
Bglap	5.9934e-47	3.71	0.754	0.407	0.347	1.39101e-42	mature Obs
Rcor2	6.34372e-46	0.42	0.561	0.15	0.411	1.47231e-41	mature Obs
Fam46a	6.44273e-46	0.9	0.95	0.652	0.298	1.49529e-41	mature Obs
Gnai1	7.91943e-46	0.53	0.698	0.254	0.444	1.83802e-41	mature Obs
Sorcs2	8.91416e-46	0.33	0.427	0.078	0.349	2.06889e-41	mature Obs
Gxylt2	1.06352e-44	0.7	0.908	0.582	0.326	2.46833e-40	mature Obs
Kif21a	1.56558e-44	0.32	0.433	0.085	0.348	3.63356e-40	mature Obs
Slc39a13	1.96764e-44	0.49	0.704	0.259	0.445	4.56669e-40	mature Obs
Mical3	2.16007e-44	0.58	0.751	0.303	0.448	5.0133e-40	mature Obs
Cybrd1	7.11702e-44	0.3	0.358	0.05	0.308	1.65179e-39	mature Obs
Cystm1	1.18594e-43	0.33	0.341	0.045	0.296	2.75244e-39	mature Obs
Bmp7	2.25181e-43	0.31	0.318	0.037	0.281	5.22623e-39	mature Obs
Sec13	2.92528e-43	0.63	0.911	0.626	0.285	6.78928e-39	mature Obs
Bglap2	3.58602e-43	3.34	0.693	0.345	0.348	8.32279e-39	mature Obs
Itga10	4.95455e-43	0.48	0.737	0.275	0.462	1.1499e-38	mature Obs
Prorsd1	1.48685e-42	0.41	0.628	0.208	0.42	3.45084e-38	mature Obs
Ston2	1.52655e-42	0.4	0.489	0.122	0.367	3.54297e-38	mature Obs
Me2	1.843e-42	0.52	0.673	0.252	0.421	4.27742e-38	mature Obs
Fam189a2	2.09393e-42	0.31	0.358	0.055	0.303	4.85981e-38	mature Obs
Loxl4	2.52895e-42	0.31	0.391	0.07	0.321	5.86944e-38	mature Obs
Pcsk5	2.57599e-42	0.4	0.628	0.197	0.431	5.97862e-38	mature Obs
Farp2	2.78272e-42	0.32	0.416	0.082	0.334	6.45842e-38	mature Obs
Golph3	2.90945e-42	0.62	0.874	0.537	0.337	6.75254e-38	mature Obs
Tram1	3.61892e-42	0.65	0.908	0.63	0.278	8.39914e-38	mature Obs
Mthfd2	3.67407e-42	0.51	0.668	0.245	0.423	8.52715e-38	mature Obs
Metrnl	5.39494e-42	0.75	0.894	0.568	0.326	1.25211e-37	mature Obs
Herpud1	8.76609e-42	0.63	0.813	0.422	0.391	2.03452e-37	mature Obs
Pcdh7	1.47797e-41	0.47	0.598	0.188	0.41	3.43023e-37	mature Obs
Scrn1	1.60897e-41	0.31	0.475	0.109	0.366	3.73426e-37	mature Obs
Rassf4	6.68444e-41	0.29	0.293	0.03	0.263	1.55139e-36	mature Obs
Slc38a10	7.181e-41	0.67	0.911	0.654	0.257	1.66664e-36	mature Obs
Arfgap1	1.21224e-40	0.43	0.67	0.244	0.426	2.81349e-36	mature Obs
Adgrd1	3.32337e-40	0.29	0.391	0.073	0.318	7.7132e-36	mature Obs
Mtss1	6.23214e-40	0.41	0.64	0.221	0.419	1.44642e-35	mature Obs
Impdh1	3.40352e-39	0.5	0.654	0.261	0.393	7.89922e-35	mature Obs
Sra1	6.43464e-39	0.61	0.846	0.516	0.33	1.49342e-34	mature Obs
Sytl2	9.4324e-39	0.38	0.472	0.124	0.348	2.18917e-34	mature Obs
Tmem263	1.80176e-38	0.58	0.838	0.458	0.38	4.18171e-34	mature Obs
Hpgd	1.95116e-38	0.87	0.849	0.528	0.321	4.52845e-34	mature Obs
Cryzl2	1.05807e-37	0.3	0.422	0.095	0.327	2.45567e-33	mature Obs
Snd1	1.06597e-37	0.56	0.827	0.453	0.374	2.47401e-33	mature Obs
Yif1a	2.89599e-37	0.56	0.846	0.524	0.322	6.7213e-33	mature Obs
Satb2	4.59783e-37	0.55	0.919	0.56	0.359	1.06711e-32	mature Obs
Chst11	4.74259e-37	0.47	0.628	0.238	0.39	1.10071e-32	mature Obs
Pcolce2	5.80259e-37	0.51	0.469	0.132	0.337	1.34672e-32	mature Obs
Sec23a	8.81826e-37	0.59	0.763	0.391	0.372	2.04663e-32	mature Obs
Satb1	7.96161e-36	0.3	0.461	0.12	0.341	1.84781e-31	mature Obs
Slc35a2	1.24447e-35	0.43	0.659	0.268	0.391	2.88828e-31	mature Obs
Sema4d	2.43333e-35	0.28	0.369	0.074	0.295	5.64753e-31	mature Obs
Avpi1	2.79164e-35	0.49	0.601	0.22	0.381	6.47911e-31	mature Obs
Fbxo28	5.68256e-35	0.35	0.545	0.18	0.365	1.31887e-30	mature Obs
Ufsp2	1.56319e-34	0.4	0.656	0.253	0.403	3.62801e-30	mature Obs
Psat1	1.74452e-34	0.36	0.561	0.188	0.373	4.04886e-30	mature Obs
Plcd1	2.29272e-34	0.39	0.62	0.236	0.384	5.32118e-30	mature Obs
Slc41a2	2.87473e-34	0.42	0.453	0.128	0.325	6.67197e-30	mature Obs
Tmem97	3.06479e-34	0.52	0.712	0.31	0.402	7.11308e-30	mature Obs
Xbp1	3.93179e-34	0.52	0.802	0.448	0.354	9.12529e-30	mature Obs
Ap1s2	4.11135e-34	0.47	0.645	0.253	0.392	9.54204e-30	mature Obs
Tmem45a	4.77628e-34	0.41	0.656	0.254	0.402	1.10853e-29	mature Obs
Ust	1.33428e-33	0.3	0.441	0.118	0.323	3.09673e-29	mature Obs
Plaur	1.68031e-33	0.44	0.539	0.186	0.353	3.89984e-29	mature Obs
Gorasp2	3.28955e-33	0.54	0.911	0.598	0.313	7.63472e-29	mature Obs
Arfgap3	4.51574e-33	0.4	0.561	0.194	0.367	1.04806e-28	mature Obs
Ell2	5.78582e-33	0.45	0.721	0.324	0.397	1.34283e-28	mature Obs
Zbtb7c	9.41697e-33	0.26	0.385	0.088	0.297	2.18559e-28	mature Obs
Gpr153	1.53193e-32	0.52	0.807	0.446	0.361	3.55546e-28	mature Obs
Asns	1.60581e-32	0.37	0.567	0.204	0.363	3.72692e-28	mature Obs
Pdzd2	2.30925e-32	0.34	0.413	0.108	0.305	5.35954e-28	mature Obs
Uso1	2.4961e-32	0.5	0.816	0.461	0.355	5.7932e-28	mature Obs
Ppa1	3.77375e-32	0.67	0.788	0.481	0.307	8.75849e-28	mature Obs
2310039H08Rik	1.72662e-31	0.47	0.751	0.397	0.354	4.0073e-27	mature Obs
Gm15417	3.29106e-31	0.31	0.508	0.167	0.341	7.63821e-27	mature Obs
Gmppb	5.8216e-31	0.26	0.416	0.111	0.305	1.35114e-26	mature Obs
Gpr180	7.25185e-31	0.46	0.779	0.418	0.361	1.68308e-26	mature Obs
Ndrg1	1.56543e-30	0.58	0.718	0.364	0.354	3.63322e-26	mature Obs
Tmtc2	2.87416e-30	0.37	0.62	0.246	0.374	6.67063e-26	mature Obs
Pde4dip	3.17562e-30	0.28	0.436	0.127	0.309	7.37029e-26	mature Obs
Scx	4.55117e-30	0.29	0.335	0.074	0.261	1.05628e-25	mature Obs
Fyn	9.03823e-30	0.5	0.813	0.491	0.322	2.09768e-25	mature Obs
Prcp	9.4211e-30	0.48	0.835	0.463	0.372	2.18654e-25	mature Obs
Ackr3	9.56881e-30	0.76	0.352	0.093	0.259	2.22083e-25	mature Obs
Lbh	1.52513e-29	0.49	0.684	0.329	0.355	3.53967e-25	mature Obs
Pgm3	1.58324e-29	0.44	0.623	0.274	0.349	3.67454e-25	mature Obs
Panx3	1.68578e-29	0.47	0.539	0.208	0.331	3.91253e-25	mature Obs
Gm266	2.13682e-29	0.29	0.425	0.122	0.303	4.95935e-25	mature Obs
Btg2	3.36815e-29	0.7	0.883	0.605	0.278	7.81715e-25	mature Obs
Dnajc25	5.79104e-29	0.43	0.712	0.358	0.354	1.34404e-24	mature Obs
Cd59a	8.48209e-29	0.46	0.626	0.282	0.344	1.96861e-24	mature Obs
Slc39a7	8.77274e-29	0.48	0.894	0.624	0.27	2.03606e-24	mature Obs
Specc1	9.4558e-29	0.28	0.539	0.189	0.35	2.1946e-24	mature Obs
Ormdl3	1.59592e-28	0.4	0.771	0.39	0.381	3.70397e-24	mature Obs
Yif1b	2.17801e-28	0.54	0.852	0.584	0.268	5.05495e-24	mature Obs
Myo1d	2.2498e-28	0.34	0.592	0.238	0.354	5.22156e-24	mature Obs
Cercam	2.72689e-28	0.36	0.581	0.233	0.348	6.32884e-24	mature Obs
Zfp9	3.71337e-28	0.29	0.503	0.171	0.332	8.61835e-24	mature Obs
Ndfip1	1.15944e-27	0.33	0.687	0.302	0.385	2.69095e-23	mature Obs
Tmem214	1.18578e-27	0.4	0.707	0.334	0.373	2.75208e-23	mature Obs
Abl2	3.10009e-27	0.38	0.631	0.275	0.356	7.19501e-23	mature Obs
Pck2	3.23334e-27	0.39	0.712	0.338	0.374	7.50426e-23	mature Obs
Tcf7	4.62827e-27	0.29	0.492	0.173	0.319	1.07418e-22	mature Obs
Nans	7.21141e-27	0.41	0.749	0.396	0.353	1.6737e-22	mature Obs
Myo10	3.03548e-26	0.45	0.902	0.593	0.309	7.04505e-22	mature Obs
Mical2	4.80717e-26	0.32	0.503	0.19	0.313	1.1157e-21	mature Obs
Ptpn4	8.61883e-26	0.28	0.478	0.166	0.312	2.00034e-21	mature Obs
Klhl21	9.03454e-26	0.29	0.483	0.174	0.309	2.09683e-21	mature Obs
Fam3c	1.03942e-25	0.42	0.723	0.388	0.335	2.4124e-21	mature Obs
Srprb	1.22874e-25	0.38	0.729	0.365	0.364	2.85178e-21	mature Obs
Endog	3.86072e-25	0.27	0.539	0.214	0.325	8.96035e-21	mature Obs
Pkdcc	5.91921e-25	0.44	0.707	0.369	0.338	1.37379e-20	mature Obs
Akap9	1.47324e-24	0.43	0.768	0.436	0.332	3.41924e-20	mature Obs
Slc35c2	1.58045e-24	0.25	0.5	0.186	0.314	3.66806e-20	mature Obs
Nme2	2.39814e-24	0.37	0.765	0.403	0.362	5.56584e-20	mature Obs
Arfip2	2.83389e-24	0.27	0.603	0.258	0.345	6.57717e-20	mature Obs
Cdk5rap3	3.17011e-24	0.39	0.782	0.443	0.339	7.35751e-20	mature Obs
Pdgfc	8.47735e-24	0.33	0.665	0.314	0.351	1.96751e-19	mature Obs
Irx5	1.44244e-23	0.6	0.536	0.225	0.311	3.34776e-19	mature Obs
Aqp1	2.23243e-23	0.3	0.765	0.386	0.379	5.18126e-19	mature Obs
Snai1	2.28724e-23	0.31	0.455	0.172	0.283	5.30845e-19	mature Obs
Arid5a	3.15049e-23	0.37	0.598	0.276	0.322	7.31197e-19	mature Obs
Dnajc1	6.18874e-23	0.37	0.844	0.515	0.329	1.43635e-18	mature Obs
1810055G02Rik	8.03906e-23	0.27	0.492	0.19	0.302	1.86579e-18	mature Obs
Mageh1	8.37698e-23	0.31	0.603	0.272	0.331	1.94421e-18	mature Obs
Chn1	1.00052e-22	0.33	0.573	0.261	0.312	2.3221e-18	mature Obs
Alg5	2.34799e-22	0.38	0.757	0.427	0.33	5.44944e-18	mature Obs
Fam78b	2.63279e-22	0.29	0.439	0.164	0.275	6.11044e-18	mature Obs
Sppl2a	4.15912e-22	0.39	0.86	0.533	0.327	9.6529e-18	mature Obs
Plpp5	5.18822e-22	0.31	0.668	0.334	0.334	1.20413e-17	mature Obs
Ano6	6.33787e-22	0.34	0.561	0.261	0.3	1.47096e-17	mature Obs
Mgst3	7.98872e-22	0.39	0.626	0.315	0.311	1.8541e-17	mature Obs
Dapk2	8.37676e-22	0.36	0.855	0.501	0.354	1.94416e-17	mature Obs
Scfd1	1.11634e-21	0.33	0.709	0.369	0.34	2.59091e-17	mature Obs
Elmo1	1.90212e-21	0.36	0.687	0.338	0.349	4.41462e-17	mature Obs
Aldh18a1	2.63661e-21	0.27	0.503	0.207	0.296	6.1193e-17	mature Obs
Srpr	9.62704e-21	0.4	0.827	0.551	0.276	2.23434e-16	mature Obs
Gtf2e2	1.79731e-20	0.35	0.623	0.332	0.291	4.17138e-16	mature Obs
Golt1b	1.94827e-20	0.34	0.768	0.447	0.321	4.52174e-16	mature Obs
Iars	2.31181e-20	0.29	0.528	0.222	0.306	5.36547e-16	mature Obs
Derl1	2.82393e-20	0.36	0.813	0.492	0.321	6.55407e-16	mature Obs
Lysmd3	4.26055e-20	0.3	0.64	0.333	0.307	9.8883e-16	mature Obs
Tars	4.58679e-20	0.31	0.581	0.286	0.295	1.06455e-15	mature Obs
Hist1h2bc	5.14746e-20	0.33	0.774	0.438	0.336	1.19467e-15	mature Obs
Stim2	5.42013e-20	0.3	0.556	0.261	0.295	1.25796e-15	mature Obs
Pxdc1	5.67464e-20	0.46	0.802	0.518	0.284	1.31703e-15	mature Obs
Pdia5	6.06763e-20	0.28	0.642	0.324	0.318	1.40824e-15	mature Obs
Ikbip	9.67779e-20	0.34	0.796	0.498	0.298	2.24612e-15	mature Obs
Bambi	1.36847e-19	0.59	0.771	0.497	0.274	3.17609e-15	mature Obs
Rcan1	1.53153e-19	0.56	0.522	0.266	0.256	3.55453e-15	mature Obs
Ibtk	1.80155e-19	0.27	0.603	0.287	0.316	4.18121e-15	mature Obs
Mbd2	2.39782e-19	0.4	0.81	0.546	0.264	5.56511e-15	mature Obs
Mpnd	2.48252e-19	0.25	0.575	0.266	0.309	5.76167e-15	mature Obs
Cdh15	5.50067e-19	0.29	0.64	0.309	0.331	1.27665e-14	mature Obs
Csrnp1	5.95652e-19	0.38	0.67	0.384	0.286	1.38245e-14	mature Obs
Bet1l	1.17496e-18	0.29	0.587	0.296	0.291	2.72697e-14	mature Obs
B3gnt9	1.40916e-18	0.25	0.609	0.3	0.309	3.27053e-14	mature Obs
Xpot	2.27234e-18	0.31	0.617	0.297	0.32	5.27388e-14	mature Obs
Chpf2	7.71731e-18	0.28	0.696	0.374	0.322	1.79111e-13	mature Obs
Sp7	1.791e-17	0.34	0.735	0.424	0.311	4.15673e-13	mature Obs
Mrps34	2.21562e-17	0.26	0.668	0.355	0.313	5.14223e-13	mature Obs
Ss18l2	2.29387e-17	0.27	0.592	0.305	0.287	5.32385e-13	mature Obs
Pls3	2.61501e-17	0.47	0.777	0.523	0.254	6.06917e-13	mature Obs
Sec22b	2.69293e-17	0.36	0.835	0.564	0.271	6.25001e-13	mature Obs
Praf2	4.84291e-17	0.27	0.609	0.319	0.29	1.12399e-12	mature Obs
Erlec1	4.90779e-17	0.32	0.807	0.524	0.283	1.13905e-12	mature Obs
Cdc42ep3	1.08182e-16	0.28	0.598	0.311	0.287	2.5108e-12	mature Obs
Eaf1	1.65322e-16	0.3	0.592	0.311	0.281	3.83695e-12	mature Obs
Lrrfip2	1.72404e-16	0.28	0.684	0.389	0.295	4.00132e-12	mature Obs
Copg1	8.10217e-16	0.32	0.835	0.552	0.283	1.88043e-11	mature Obs
Use1	1.3767e-15	0.3	0.83	0.542	0.288	3.19518e-11	mature Obs
Nxn	1.60138e-15	0.27	0.615	0.311	0.304	3.71664e-11	mature Obs
Ppp2r5a	4.40836e-15	0.34	0.732	0.459	0.273	1.02314e-10	mature Obs
Slc35e4	5.9957e-15	0.27	0.553	0.301	0.252	1.39154e-10	mature Obs
Bet1	7.44278e-15	0.25	0.712	0.415	0.297	1.7274e-10	mature Obs
Ufm1	1.06203e-14	0.31	0.83	0.578	0.252	2.46486e-10	mature Obs
Ppp1r37	1.20831e-14	0.26	0.648	0.34	0.308	2.80437e-10	mature Obs
Cd1d1	2.01781e-14	0.29	0.737	0.485	0.252	4.68313e-10	mature Obs
Tmem57	5.61389e-14	0.26	0.816	0.499	0.317	1.30293e-09	mature Obs
Yipf3	1.19392e-13	0.26	0.763	0.491	0.272	2.77097e-09	mature Obs
Mast4	1.35758e-13	0.26	0.592	0.325	0.267	3.1508e-09	mature Obs
Sema5a	1.02967e-12	0.3	0.737	0.441	0.296	2.38976e-08	mature Obs
