# Supplementary material for: MMP14 cleaves PTH1R in the chondrocyte-derived osteoblast lineage, curbing signaling intensity for proper bone anabolism
Source: eLife. 2023 Mar 9;12:e82142. doi: 10.7554/eLife.82142 (PMC10036123; doi:10.7554/eLife.82142)
Supplement: Figure 1—source data 4. [file elife-82142-fig1-data4.xlsx]

## Sheet: P6.P56.osteogenic.HC.vs.nonHC
genes	p_val	avg_log2FC	percentage expressed in HC	percentage expressed in non-HC	status	FDR q
Mmp9	8.25849e-12	1.49956	0.498	0.297	higher in HC	1.91671e-07
Ibsp	2.14296e-25	1.21098	0.899	0.781	higher in HC	4.97359e-21
Nupr1	1.36258e-18	0.869945	0.835	0.6	higher in HC	3.16241e-14
Neat1	2.44414e-12	0.736135	0.929	0.871	higher in HC	5.67261e-08
Mmp13	9.26851e-10	0.601096	0.808	0.664	higher in HC	2.15113e-05
Car3	1.69385e-11	0.596288	0.613	0.4	higher in HC	3.93125e-07
Htra3	8.68841e-29	0.581441	0.771	0.421	higher in HC	2.01649e-24
Creb3l1	1.31469e-09	0.538604	0.663	0.528	higher in HC	3.05125e-05
Rbp4	1.94846e-17	0.505173	0.519	0.265	higher in HC	4.52218e-13
Pcolce2	2.73873e-27	0.501504	0.458	0.158	higher in HC	6.35632e-23
Fos	2.61239e-07	-0.538157	0.788	0.832	higher in non-HC	0.00606309
Clec11a	9.748e-16	-0.546501	0.768	0.815	higher in non-HC	2.26241e-11
Nav3	6.69702e-13	-0.549181	0.354	0.534	higher in non-HC	1.55431e-08
Tnc	3.90903e-08	-0.561745	0.875	0.864	higher in non-HC	0.000907246
Mfap2	1.36779e-17	-0.567316	0.657	0.809	higher in non-HC	3.17451e-13
Mpp6	2.93027e-12	-0.575039	0.62	0.713	higher in non-HC	6.80086e-08
Zfhx4	1.32067e-16	-0.580061	0.589	0.744	higher in non-HC	3.06514e-12
S100a6	6.52426e-10	-0.631893	0.71	0.796	higher in non-HC	1.51422e-05
Cd9	1.93559e-20	-0.638222	0.865	0.897	higher in non-HC	4.49231e-16
Thbs2	4.944e-20	-0.651898	0.374	0.611	higher in non-HC	1.14745e-15
Efna5	5.24031e-18	-0.667359	0.316	0.555	higher in non-HC	1.21622e-13
S100a4	1.75872e-10	-0.701913	0.232	0.396	higher in non-HC	4.0818e-06
Ogn	6.2749e-10	-0.708043	0.357	0.507	higher in non-HC	1.45634e-05
Col12a1	6.68684e-14	-0.723929	0.855	0.893	higher in non-HC	1.55195e-09
Igfbp5	1.24456e-16	-0.724825	0.468	0.738	higher in non-HC	2.8885e-12
Rpl39l	1.48902e-28	-0.732783	0.273	0.615	higher in non-HC	3.45587e-24
Col6a3	1.68316e-10	-0.734227	0.747	0.816	higher in non-HC	3.90644e-06
Vcan	3.27894e-12	-0.766455	0.62	0.759	higher in non-HC	7.61009e-08
Mgp	9.33558e-08	-0.861275	0.455	0.564	higher in non-HC	0.0021667
Ptn	2.6609e-16	-1.00919	0.316	0.547	higher in non-HC	6.17569e-12
Mest	3.07227e-15	-1.02141	0.542	0.687	higher in non-HC	7.13043e-11
Igf1	4.48227e-10	-1.02431	0.276	0.463	higher in non-HC	1.04029e-05
Aspn	2.23339e-18	-1.29006	0.02	0.254	higher in non-HC	5.18349e-14
Postn	4.30447e-36	-1.57993	0.303	0.675	higher in non-HC	9.99024e-32
Bglap2	4.59635e-08	-1.68137	0.35	0.478	higher in non-HC	0.00106677
Bglap	2.43809e-08	-1.77625	0.421	0.537	higher in non-HC	0.000565857
Col3a1	8.74947e-51	-2.38524	0.431	0.815	higher in non-HC	2.03066e-46
Bglap3	6.6126e-07	-2.60838	0.125	0.256	higher in non-HC	0.0153472
