# Supplementary material for: MMP14 cleaves PTH1R in the chondrocyte-derived osteoblast lineage, curbing signaling intensity for proper bone anabolism
Source: eLife journal article supplement (doi:10.7554/elife.82142), 2023-03-09
Supplement: supp [file elife-82142-supp-v1.zip]

Figure 7—figure supplement 1

A

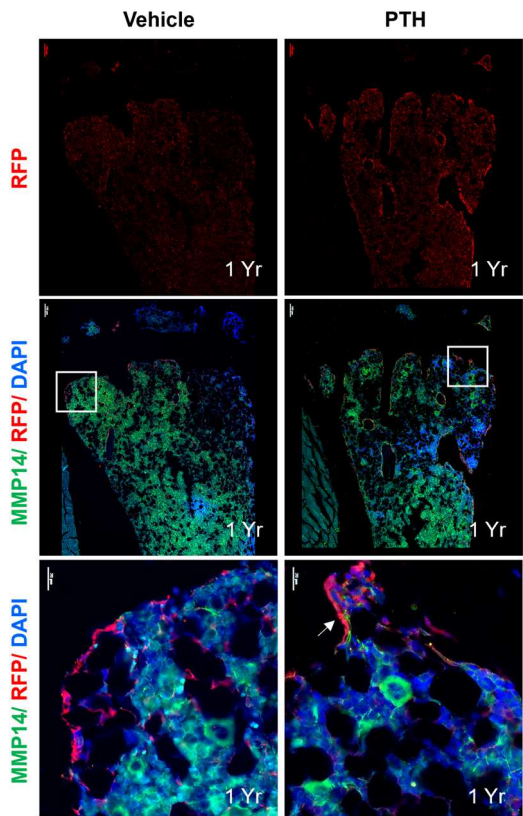

Figure 7—figure supplement 1. Expression of MMP14 in HC-derived cells with Aging (A), Representative immunofluorescence images of RFP (red), Mmp14 (green) and DAPI (blue) in trabecular region from 1 year old control mice before (left) and after PTH induction (right column). Scale bar = 100μm, 20μm.
