# Supplementary material for: MMP14 cleaves PTH1R in the chondrocyte-derived osteoblast lineage, curbing signaling intensity for proper bone anabolism
Source: eLife journal article supplement (doi:10.7554/elife.82142), 2023-03-09
Supplement: supp [file elife-82142-supp-v1.zip]

Figure 6—Figure Supplement 1

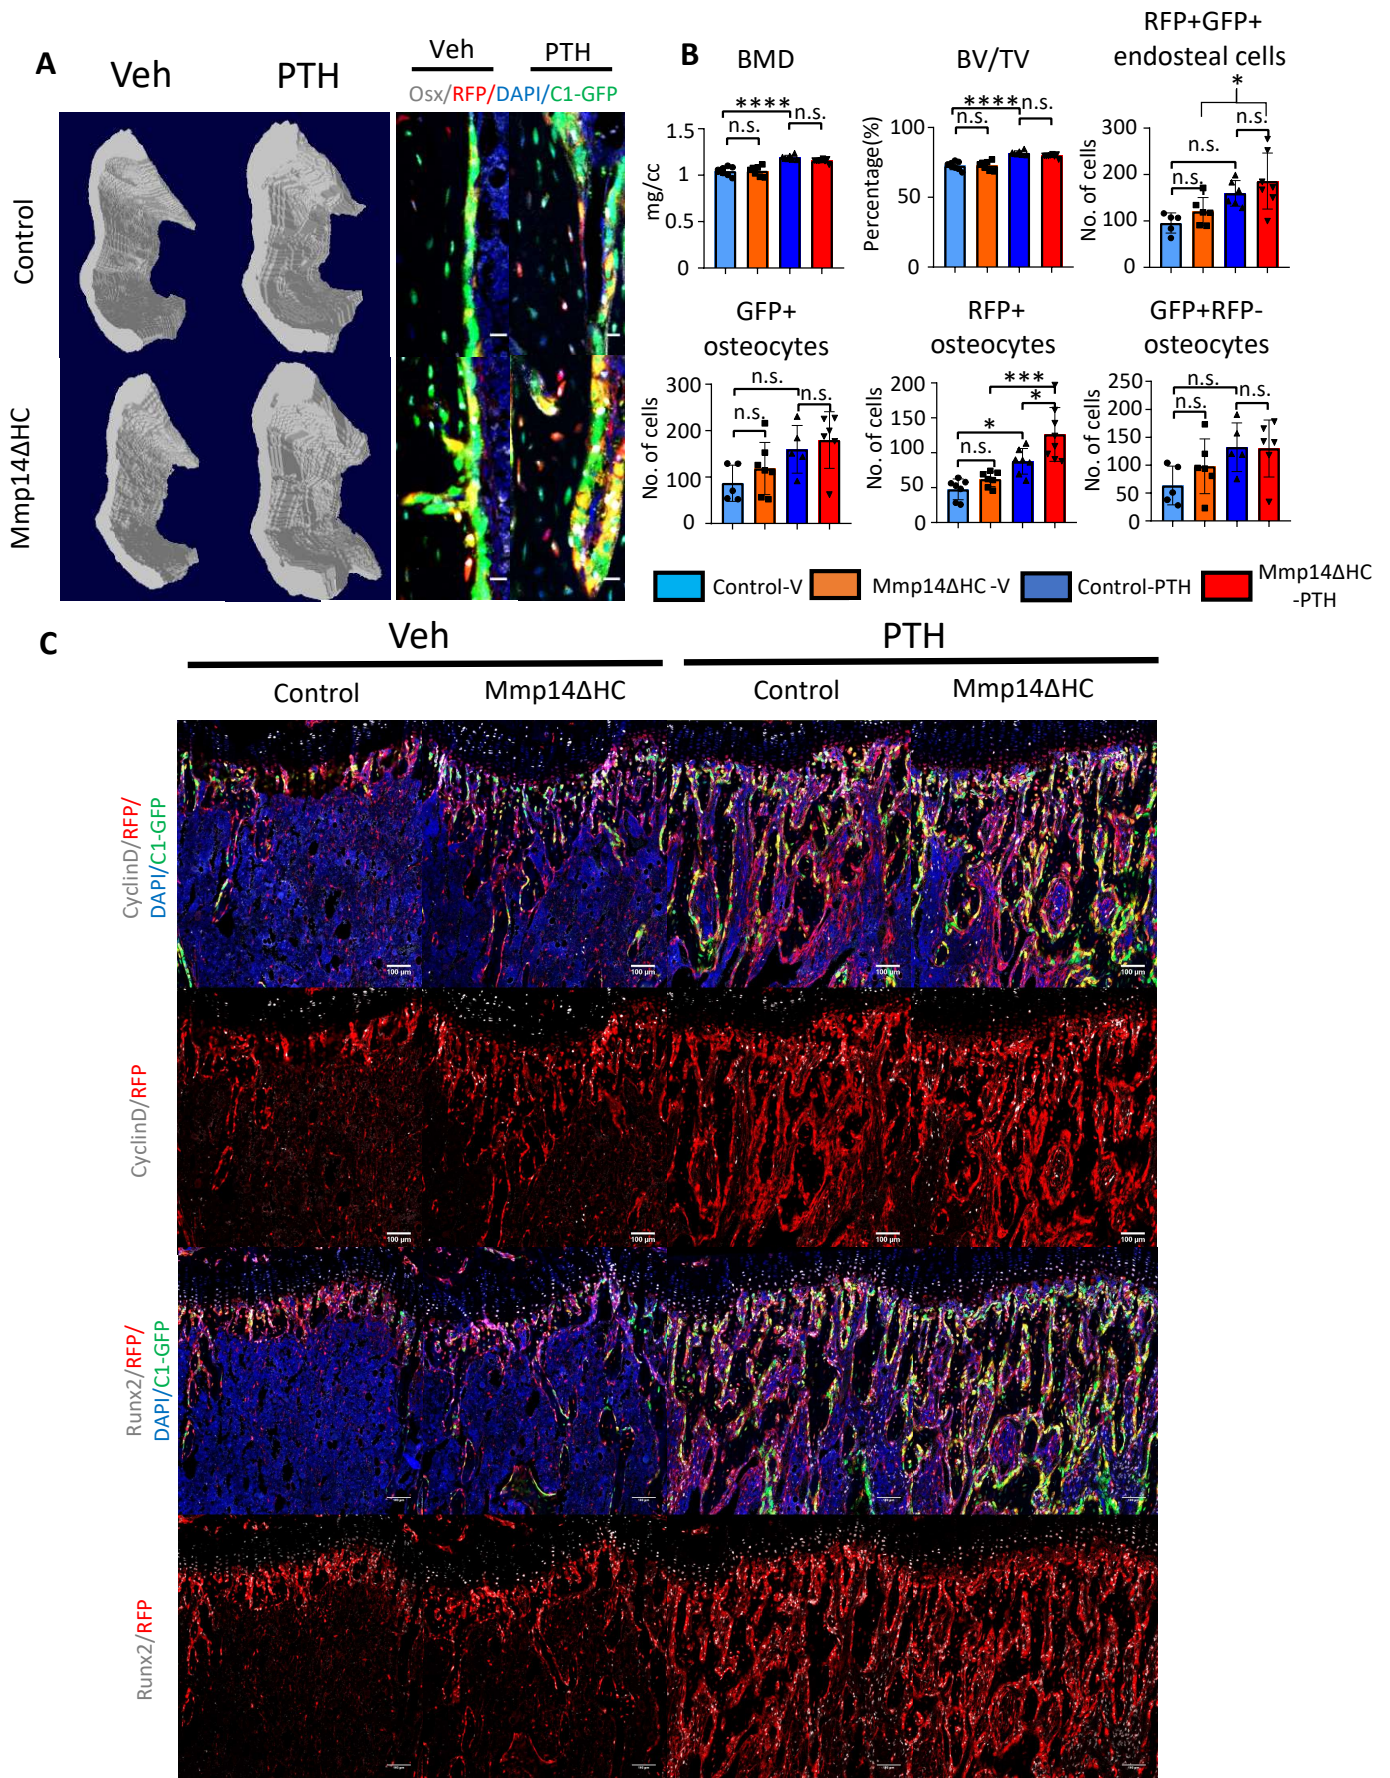

**Figure 6—figure supplement 1. Differential response to PTH in cortical osteocytes compared to trabecular osteoblast. (A),** Transverse images of cortical bone via MicroCT reconstruction in Control and Mmp14ΔHC mice treated with vehicle and PTH(1-34). Representative immunofluorescence images of OSTERIX, RFP, GFP and DAPI in cortical region are presented. **(B),** Quantitation of BMD, BV/TV in the cortical region as indicated in a. Quantitation of RFP+GFP+, RFP+, RFP-GFP+ osteocytes and endosteal RFP+ cells. \*  $p < 0.05$ , \*\*  $p < 0.01$ , \*\*\*  $p < 0.001$  by Oneway ANOVA followed by Turkey's post hoc test was used to determine statistical significance. **(C),** Representative immunofluorescence images of CyclinD, Runx2, RFP, GFP and DAPI in trabecular region are presented.
