# Supplementary material for: MMP14 cleaves PTH1R in the chondrocyte-derived osteoblast lineage, curbing signaling intensity for proper bone anabolism
Source: eLife journal article supplement (doi:10.7554/elife.82142), 2023-03-09
Supplement: supp [file elife-82142-supp-v1.zip]

List of Antibodies Used in this Manuscript

| <b>Antibody</b>            | <b>Source</b>  | <b>Catalogue number</b> | <b>ratio</b>                   |
|----------------------------|----------------|-------------------------|--------------------------------|
| <b>HA-tag</b>              | Immunoway      | YM3003                  | 1:5000                         |
| <b>MT1-MMP<br/>(MMP14)</b> | Abcam          | ab51074                 | 1:5000 for WB<br>1:200 for IHC |
| <b>RFP</b>                 | SCIGEN         |                         | 1:500 for IHC                  |
| <b>RFP</b>                 | Abcam          | ab123754                | 1:200                          |
| <b>GFP</b>                 | ThermoFisher   | A10262                  | 1:1000                         |
| <b>Osterix</b>             | Abcam          | ab22552                 | 1:200                          |
| <b>p-creb(S133)</b>        | Abcam          | ab43096                 | 1:200                          |
| <b>t-creb</b>              | Abcam          | ab32515                 | 1:1000                         |
| <b>p-erk</b>               | Cell Signaling | CS4370                  | 1:2000                         |
| <b>t-erk</b>               | Cell Signaling | CS                      | 1:1000                         |
| <b>PTH1R</b>               | ThermoFisher   | MA5-15676               | 1:1000                         |
| <b>PTH1R</b>               | ThermoFisher   | PA3-205                 | 1:5000                         |
| <b>His-tag</b>             | Immunoway      | YM3004                  | 1:1000                         |
| <b>β-actin</b>             | Sigma          |                         |                                |

List of ISH probes used in this Manuscript

| Gene    | Plasmid name | Enzyme                         | Description                                                                                                      |
|---------|--------------|--------------------------------|------------------------------------------------------------------------------------------------------------------|
| Col1a1  | pSp65-1      | HindIII/Sp6(AS)                | This plasmid contains a 0.8 kb gene fragment of the mouse <i>Col1a1</i> gene                                     |
| Col2a1  | pNJ61        | HindIII/T7(S)<br>EcoRI/T3(AS)  | This plasmid contains a 0.5kb cDNA fragment from exon 1 to 5 of mouse <i>Col2a1</i> gene                         |
| Col10a1 | pRK26        | EcoRI/Sp6(AS)<br>HindIII/T7(S) | This plasmid contains a 0.35kb cDNA fragment of exon 3 and 3' untranslated region from mouse <i>Col10a1</i> gene |
| Mmp14   | pMT1E4       | EcoRI/Sp6(AS)<br>HindIII/T7(S) | This plasmid contains a 300bps fragment from Exon 4 of <i>Mmp14</i> gene                                         |
| Mmp13   | M collase    | HindIII/T7(AS)                 | 731 bps derived from mouse <i>Mmp13</i> AvrII-HindIII fragment                                                   |
| Sox9    | pSox9.5a     | BamHI/T3(S)<br>HindIII/T7(AS)  | This plasmid contains a 0.5kb DNA from 3' to the mouse <i>Sox9</i> gene.                                         |
| Opn     | mOP          | EcoRI/SP6(AS)                  | This probe was derived from mouse Osteopontin mRNA fragment(157-1144)                                            |

Filename: Antibodies and ISH probe list  
Directory: C:\Users\nelso\Downloads  
Template: C:\Users\nelso\AppData\Roaming\Microsoft\Templates\Normal.dotm  
Title:  
Subject:  
Author: mistyzs  
Keywords:  
Comments:  
Creation Date: 4/6/2019 5:55:00 pm  
Change Number: 2  
Last Saved On: 4/6/2019 6:48:00 pm  
Last Saved By: mistyzs  
Total Editing Time: 51 Minutes  
Last Printed On: 3/5/2022 2:37:00 pm  
As of Last Complete Printing  
Number of Pages: 2  
Number of Words: 209 (approx.)  
Number of Characters: 1,197 (approx.)
