# Supplementary material for: MMP14 cleaves PTH1R in the chondrocyte-derived osteoblast lineage, curbing signaling intensity for proper bone anabolism
Source: eLife journal article supplement (doi:10.7554/elife.82142), 2023-03-09
Supplement: supp [file elife-82142-supp-v1.zip]

Figure 3—Figure Supplement 1

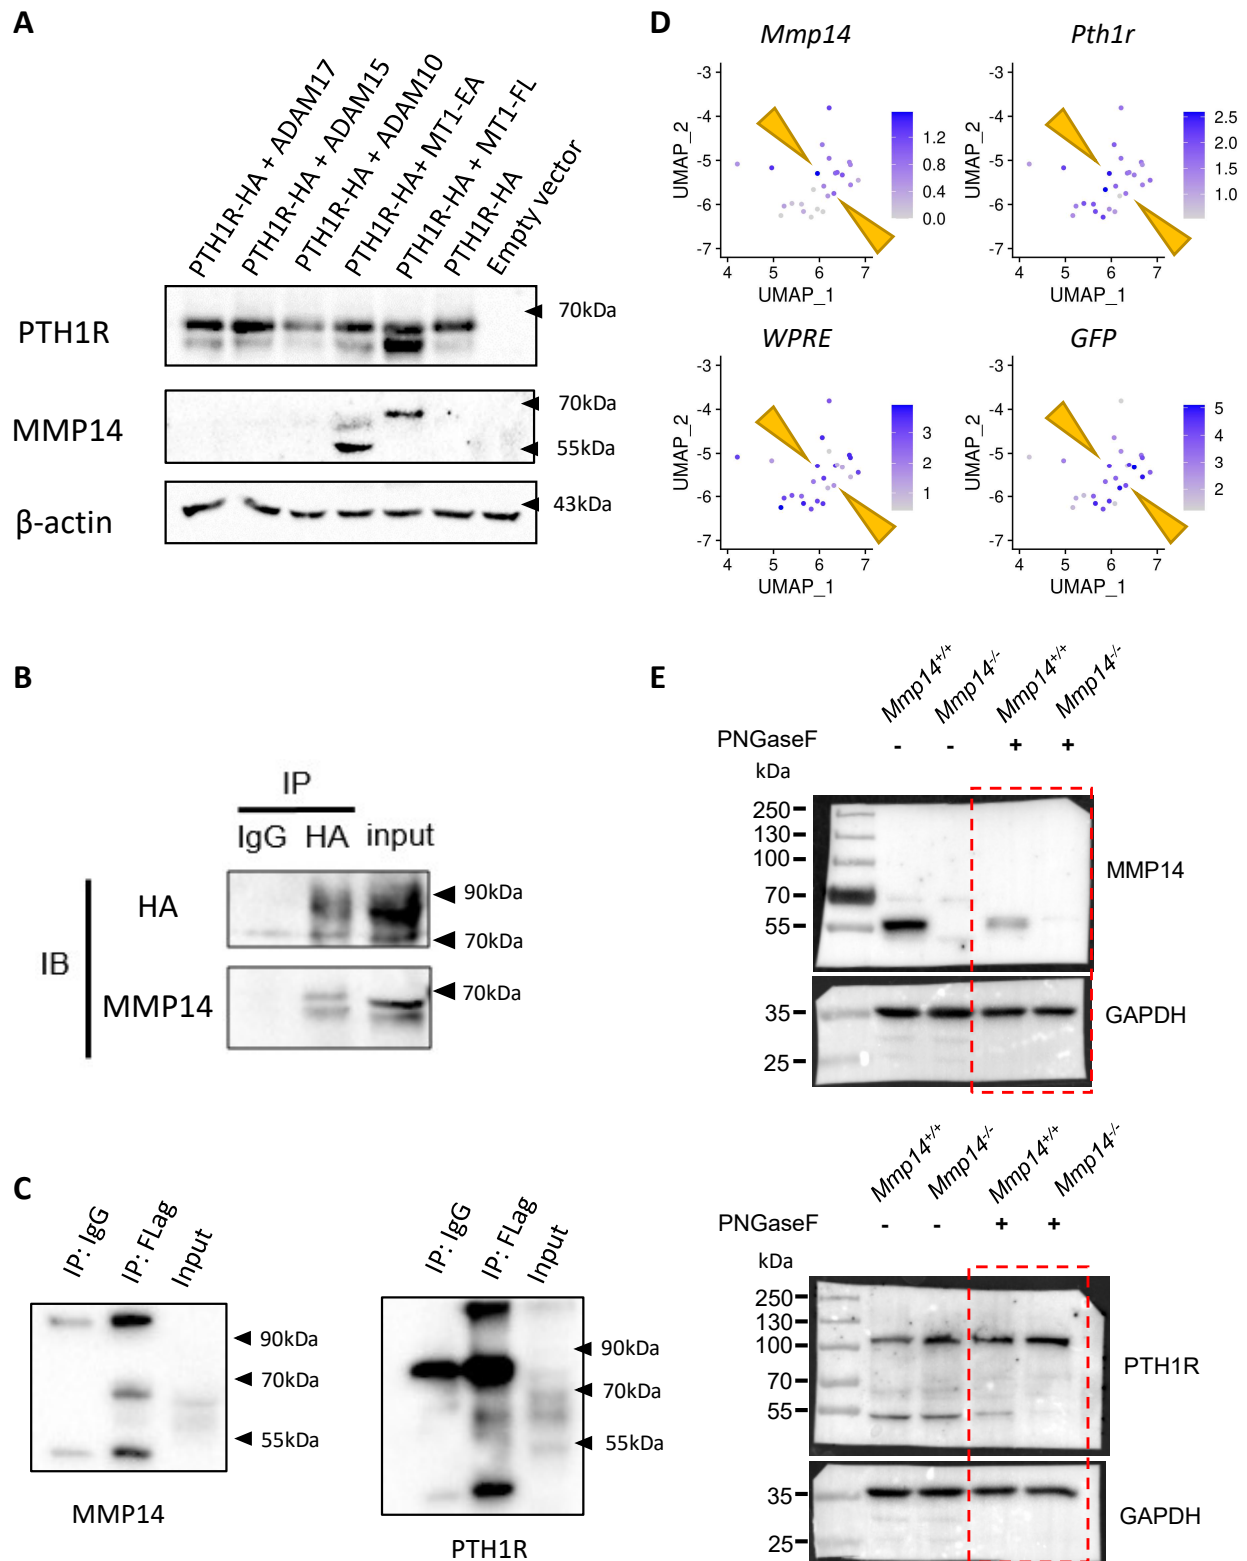

**Figure 3—figure supplement 1. MMP14 is a major protease for PTH1R.** (A), Western blot of HEK293T cells transfected with human PTH1R-HA, MT1-FL, MT1-EA, ADAM10, ADAM15 and ADAM17. (B), Co-immunoprecipitation of MMP14 with PTH1R in HEK293T cells transfected with MT1-FL and PTH1R-HA. PTH1R-HA was immunoprecipitated with anti-HA antibody in G-agarose. (C), Cell lysate from HEK293T cells transfected with PTH1R-HA, MMP14-Flag were immunoprecipitated with anti-Flag-tag antibody and analyzed by western blot. (D), FeaturePlot showing expression of *Mmp14*, *Pth1r*, *WPRE*(mRNA transcripts co-expressed with tdtomato) and *GFP* from C1-GFP using isolated cells from P56. Yellow arrow indicates cells expressing *Mmp14*, *Pth1r*, tdtomato and *GFP*. (E), Uncropped Western blots showing truncation of PTH1R treated with PNGaseF in *Mmp14*<sup>+/+</sup>(lane3) compared to *Mmp14*<sup>-/-</sup>(lane4).
