# Supplementary material for: MMP14 cleaves PTH1R in the chondrocyte-derived osteoblast lineage, curbing signaling intensity for proper bone anabolism
Source: eLife journal article supplement (doi:10.7554/elife.82142), 2023-03-09
Supplement: supp [file elife-82142-supp-v1.zip]

Figure 4—Figure Supplement 1

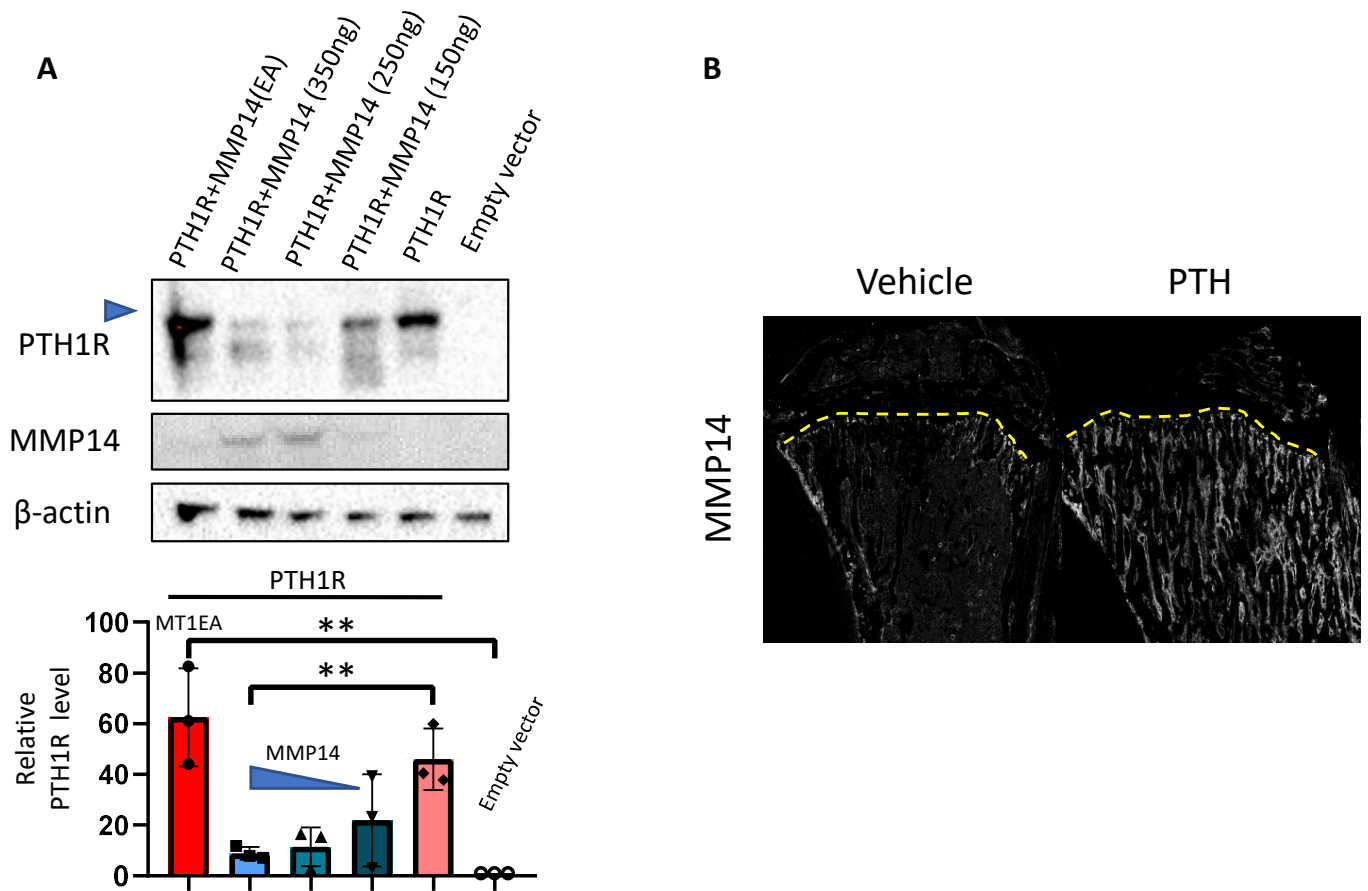

**Figure 4—figure supplement 1. MMP14 destabilize PTH1R and can be upregulated by PTH. (A),** Relative level of PTH1R in HEK293T cells co-transfected with empty vector, MMP14 and MMP14-EA. **(B),** Immunofluorescence staining of MMP14 in P56 mice treated with vehicle(left) and PTH(1-34).
